# Supplementary material for: Comparative genomics and transcriptome analysis of Aspergillus niger and metabolic engineering for citrate production
Source: PubMed Central journal article supplement (PMC5247736; doi:10.1038/srep41040), 2017-01-20
Supplement: srep41040-s1.pdf [file srep41040-s1.pdf]

**Comparative genomics and transcriptome analysis of *Aspergillus niger* and metabolic engineering for citrate production**

Xian Yin<sup>a, b</sup>, Hyun-dong Shin<sup>c</sup>, Jianghua Li<sup>a, b</sup>, Guocheng Du<sup>a, b</sup>, Long Liu<sup>a, b§</sup>, Jian Chen<sup>a§§</sup>

<sup>a</sup>Key Laboratory of Industrial Biotechnology, Ministry of Education, Jiangnan University, Wuxi 214122, China

<sup>b</sup>Key Laboratory of Carbohydrate Chemistry and Biotechnology, Ministry of Education, Jiangnan University, Wuxi 214122, China

<sup>c</sup>School of Chemical and Biomolecular Engineering, Georgia Institute of Technology, Atlanta, GA 30332, USA

Corresponding authors: <sup>§</sup>Long Liu, Tel.: +86-510-85918312, Fax: +86-510-85918309, E-mail:

[longliu@jiangnan.edu.cn](mailto:longliu@jiangnan.edu.cn); <sup>§§</sup>Jian Chen, Tel.: +86-510-85913661, Fax: +86-510-85910799, E-mail:

[jchen@jiangnan.edu.cn](mailto:jchen@jiangnan.edu.cn)

Figure captions

Figure S1. Venn diagram showed the number of function gene groups for *Aspergillus niger* H915-1 (blue), *A. niger* A1 (green) and *A. niger* L2 (red)

Figure S2. Comparison of gene expression levels by qPCR and transcriptome analysis

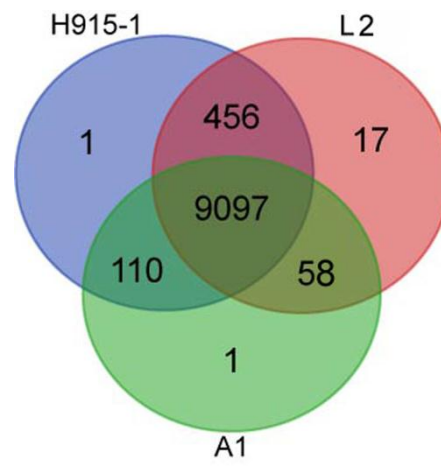

(Figure S1)

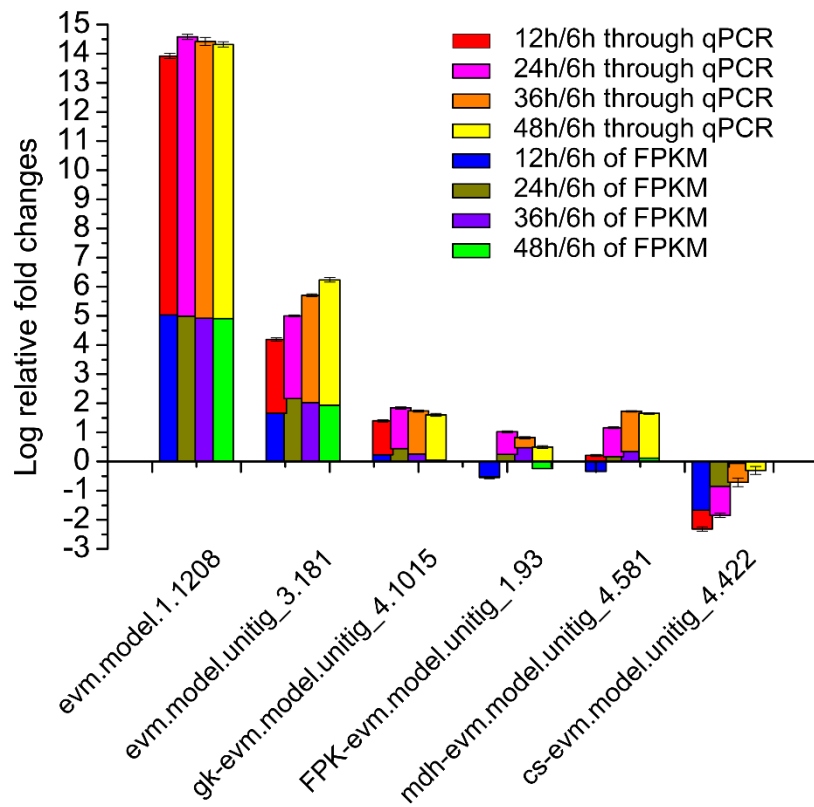

(Figure S2)

Supplementary Table S1. Primers used in this study

| Primers                         | Sequence                                   |
|---------------------------------|--------------------------------------------|
| oahA5-F                         | <u>TCTAGATACCAAGGCCAGGCCGCAA</u>           |
| oahA5-R                         | <u>GTCGACCCGCCAGCAACCAATATTCAT</u>         |
| oahA3-F                         | <u>ACTAGTACAGAACACCCTGATCGACAGT</u>        |
| oahA3-R                         | <u>AAGCTTTCTAGACCTGCTACAAATACATTGACCTC</u> |
| P1                              | TGTCAACTGAAATCTAACACCCA                    |
| P2                              | CTCAAACAAGCCTCTTTCTCTCC                    |
| P3                              | CACAGGTACTTGTTTAGAGGTAAT                   |
| P4                              | TCCACCCGAAGGTCACTGATT                      |
| Primers for qPCR                | Sequence                                   |
| Actin-F                         | CGGAACTTATTGGCTTGG                         |
| Actin-R                         | ACAGAACGATATTGAGGTAGA                      |
| evm.model.1.1208-F              | GTC AAGGCTATCAGTTCAC                       |
| evm.model.1.1208-R              | CGGAGGTATATGCGGATA                         |
| evm.model.unitig_3.181-F        | GAACTGGAACA ACTATACG                       |
| evm.model.unitig_3.181-R        | GGAGTAATTGCTGATGAC                         |
| gk-evm.model.unitig_4.1015-F    | ACTCCTTCATTCCCACCTT                        |
| gk-evm.model.unitig_4.1015-R    | GAGAGCAGATGACATTATGACTGA                   |
| hk-evm.model.unitig_0.782-F     | AACTATCCTTCTACTACCTCTT                     |
| hk-evm.model.unitig_0.782-R     | GACGCTTAGGACCGATTC                         |
| fpk-evm.model.unitig_1.93-F     | CAAACACAAGTTATCTCTG                        |
| fpk-evm.model.unitig_1.93-R     | AGAAAGAATGGAGTAATGG                        |
| gpdph-evm.model.unitig_6.799-F  | CTACATCTCCAAGGTTGA                         |
| gadph-evm.model.unitig_6.799-R  | AATCAGTCTCACTCACAG                         |
| pk-evm.model.unitig_0.620-F     | GTACCTCGACTACAAGAAC                        |
| pk-evm.model.unitig_0.620-R     | GAAAGGATACCGTCATCAA                        |
| mdh-evm.model.unitig_4.581-F    | ATAGGTGATATGCCAATA                         |
| mdh-evm.model.unitig_4.581-R    | AGAATAACAACGATTAGC                         |
| pyc-evm.model.1.596-F           | GGTTGGGTTTGGGTATTTC                        |
| pyc-evm.model.1.596-R           | ACTTGTCAATCGTATGGTTGA                      |
| cs-evm.model.unitig_2.384-F     | GTTATCGTTTCGTCATAC                         |
| cs-evm.model.unitig_2.384-R     | ACCTATCTACTCAAAGC                          |
| cs-evm.model.unitig_4.422-F     | AGGCATTGATGGACTTC                          |
| cs-evm.model.unitig_4.422-R     | AGTTCTTCTCACCAGTT                          |
| cs-evm.model.unitig_5.597-F     | TACCGTGCCTGATATACC                         |
| cs-evm.model.unitig_5.597-R     | GCGAATGTGAACA ACTTG                        |
| cs-evm.model.unitig_1.1397-F    | TTCGTCTGATGAAGGTATGATAT                    |
| cs-evm.model.unitig_1.1397-R    | ACGCCATCCTATCCACAT                         |
| ATPcs-evm.model.unitig_3.1145-F | TTCCTTACCATCCTAA                           |
| ATPcs-evm.model.unitig_3.1145-R | GGAGATATAGATAGGTGAG                        |

Supplementary Table S3. COG classification of genomes of *A. niger* H915-1, L2 and A1

| function                                                         | Gene number |     |     |
|------------------------------------------------------------------|-------------|-----|-----|
|                                                                  | H915-1      | L2  | A1  |
| A: RNA processing and modification                               | 93          | 92  | 88  |
| B: Chromatin structure and dynamics                              | 42          | 44  | 44  |
| C: Energy production and conversion                              | 279         | 277 | 275 |
| D: Cell cycle control, cell division, chromosome partitioning    | 53          | 54  | 54  |
| E: Amino acid transport and metabolism                           | 223         | 224 | 221 |
| F: Nucleotide transport and metabolism                           | 43          | 42  | 41  |
| G: Carbohydrate transport and metabolism                         | 215         | 214 | 212 |
| H: Coenzyme transport and metabolism                             | 78          | 81  | 75  |
| I: Lipid transport and metabolism                                | 306         | 306 | 303 |
| J: Translation, ribosomal structure and biogenesis               | 161         | 164 | 156 |
| K: Transcription                                                 | 108         | 110 | 107 |
| L: Replication, recombination and repair                         | 74          | 74  | 69  |
| M: Cell wall/membrane/envelope biogenesis                        | 68          | 68  | 70  |
| N: Cell motility                                                 | 2           | 2   | 2   |
| O: Posttranslational modification, protein turnover, chaperones  | 275         | 278 | 275 |
| P: Inorganic ion transport and metabolism                        | 100         | 101 | 100 |
| Q: Secondary metabolites biosynthesis, transport and catabolism  | 340         | 339 | 344 |
| R: Signal transduction mechanisms                                | 191         | 191 | 193 |
| S: Intracellular trafficking, secretion, and vesicular transport | 132         | 131 | 131 |
| T: Defense mechanisms                                            | 32          | 33  | 32  |
| U: Extracellular structures                                      | 2           | 3   | 2   |
| V: Nuclear structure                                             | 7           | 7   | 7   |
| W: Cytoskeleton                                                  | 60          | 61  | 60  |
| X: Function unknown                                              | 872         | 881 | 864 |

Supplementary Table S4. Unique or lacked genes in *A. niger* H915-1 genome compared to A1 and L2

| gene family ID | gene function                   | gene ID of H915-1                                          | gene ID of A1                  | gene ID of L2                  |
|----------------|---------------------------------|------------------------------------------------------------|--------------------------------|--------------------------------|
| Group_0372     | hypothetical protein            | evm.model.1.1046,<br>evm.model.1.1047,<br>evm.model.1.1048 | -                              | -                              |
| Group_9159     | unnamed protein product         | -                                                          | evm.model.scf7180000037711.55  | evm.model.unitig_63_quiver.338 |
| Group_9229     | hypothetical protein            | -                                                          | evm.model.scf7180000037876.7   | evm.model.unitig_0_quiver.1310 |
| Group_9142     | hypothetical protein            | -                                                          | evm.model.scf7180000037681.24  | evm.model.unitig_1_quiver.1075 |
| Group_9277     | hypothetical protein            | -                                                          | evm.model.scf7180000037928.29  | evm.model.unitig_0_quiver.932  |
| Group_9274     | hypothetical protein            | -                                                          | evm.model.scf7180000037926.82  | evm.model.unitig_63_quiver.638 |
| Group_9124     | hypothetical protein            | -                                                          | evm.model.scf7180000037644.15  | evm.model.unitig_1_quiver.15   |
| Group_9126     | unnamed protein product         | -                                                          | evm.model.scf7180000037647.5   | evm.model.unitig_63_quiver.534 |
| Group_9206     | hypothetical protein            | -                                                          | evm.model.scf7180000037852.16  | evm.model.unitig_1_quiver.827  |
| Group_9264     | unnamed protein product         | -                                                          | evm.model.scf7180000037921.98  | evm.model.unitig_63_quiver.831 |
| Group_9249     | hypothetical protein            | -                                                          | evm.model.scf7180000037912.51  | evm.model.unitig_0_quiver.1434 |
| Group_9166     | hypothetical protein            | -                                                          | evm.model.scf7180000037719.17  | evm.model.unitig_4_quiver.1058 |
| Group_9174     | glutathione S-transferase       | -                                                          | evm.model.scf7180000037730.71  | evm.model.unitig_0_quiver.1757 |
| Group_9157     | hypothetical protein            | -                                                          | evm.model.scf7180000037696.21  | evm.model.unitig_63_quiver.761 |
| Group_9144     | unnamed protein product         | -                                                          | evm.model.scf7180000037681.52  | evm.model.unitig_1_quiver.1103 |
| Group_9231     | hypothetical protein            | -                                                          | evm.model.scf7180000037881.10  | evm.model.unitig_3_quiver.724  |
| Group_9189     | hypothetical protein            | -                                                          | evm.model.scf7180000037833.124 | evm.model.unitig_1_quiver.293  |
| Group_9182     | hypothetical protein            | -                                                          | evm.model.scf7180000037798.1   | evm.model.unitig_5_quiver.788  |
| Group_9283     | hypothetical protein            | -                                                          | evm.model.scf7180000037931.3   | evm.model.unitig_0_quiver.63   |
| Group_9287     | serine/threonine protein kinase | -                                                          | evm.model.scf7180000037934.43  | evm.model.unitig_5_quiver.745  |
| Group_9233     | hypothetical protein            | -                                                          | evm.model.scf7180000037887.36  | evm.model.unitig_5_quiver.434  |
| Group_9270     | hypothetical protein            | -                                                          | evm.model.scf7180000037924.99  | evm.model.unitig_3_quiver.836  |

| gene family ID | gene function                          | gene ID of H915-1 | gene ID of A1                  | gene ID of L2                  |
|----------------|----------------------------------------|-------------------|--------------------------------|--------------------------------|
| Group_9180     | hypothetical protein                   | -                 | evm.model.scf7180000037743.66  | evm.model.unitig_1_quiver.84   |
| Group_9267     | hypothetical protein                   | -                 | evm.model.scf7180000037922.8   | evm.model.unitig_0_quiver.1497 |
| Group_9143     | phosphoglycerate mutase family protein | -                 | evm.model.scf7180000037681.40  | evm.model.unitig_1_quiver.1091 |
| Group_9245     | cell wall protein                      | -                 | evm.model.scf7180000037911.45  | evm.model.unitig_0_quiver.477  |
| Group_9225     | hypothetical protein                   | -                 | evm.model.scf7180000037869.7   | evm.model.unitig_0_quiver.1166 |
| Group_9222     | hypothetical protein                   | -                 | evm.model.scf7180000037867.102 | evm.model.unitig_0_quiver.1274 |
| Group_9273     | hypothetical protein                   | -                 | evm.model.scf7180000037926.65  | evm.model.unitig_63_quiver.657 |
| Group_9145     | hypothetical protein                   | -                 | evm.model.scf7180000037681.85  | evm.model.unitig_1_quiver.1136 |
| Group_9247     | hypothetical protein                   | -                 | evm.model.scf7180000037912.26  | evm.model.unitig_0_quiver.1409 |
| Group_9265     | hypothetical protein                   | -                 | evm.model.scf7180000037922.31  | evm.model.unitig_0_quiver.1521 |
| Group_9235     | hypothetical protein                   | -                 | evm.model.scf7180000037894.19  | evm.model.unitig_1_quiver.807  |
| Group_9156     | integral membrane protein (Pth11)      | -                 | evm.model.scf7180000037694.23  | evm.model.unitig_3_quiver.1184 |
| Group_9121     | hypothetical protein                   | -                 | evm.model.scf7180000037640.29  | evm.model.unitig_0_quiver.1684 |
| Group_9243     | hypothetical protein                   | -                 | evm.model.scf7180000037908.28  | evm.model.unitig_56_quiver.319 |
| Group_9183     | hypothetical protein                   | -                 | evm.model.scf7180000037798.56  | evm.model.unitig_5_quiver.842  |
| Group_9148     | hypothetical protein                   | -                 | evm.model.scf7180000037683.33  | evm.model.unitig_0_quiver.1132 |
| Group_9284     | hypothetical protein                   | -                 | evm.model.scf7180000037934.128 | evm.model.unitig_5_quiver.658  |
| Group_9207     | zinc knuckle transcription factor      | -                 | evm.model.scf7180000037855.24  | evm.model.unitig_2_quiver.485  |
| Group_9192     | unnamed protein product                | -                 | evm.model.scf7180000037833.130 | evm.model.unitig_1_quiver.288  |
| Group_9175     | alcohol dehydrogenase                  | -                 | evm.model.scf7180000037730.87  | evm.model.unitig_0_quiver.1772 |
| Group_9127     | unnamed protein product                | -                 | evm.model.scf7180000037651.10  | evm.model.unitig_0_quiver.178  |
| Group_9181     | similar to LOC100382988                | -                 | evm.model.scf7180000037790.2   | evm.model.unitig_5_quiver.507  |
| Group_9250     | hypothetical protein                   | -                 | evm.model.scf7180000037912.81  | evm.model.unitig_0_quiver.1466 |

| gene family ID | gene function                   | gene ID of H915-1 | gene ID of A1                  | gene ID of L2                                                  |
|----------------|---------------------------------|-------------------|--------------------------------|----------------------------------------------------------------|
| Group_9240     | unnamed protein product         | -                 | evm.model.scf7180000037901.19  | evm.model.unitig_63_quiver.866                                 |
| Group_9160     | YCII-related domain protein     | -                 | evm.model.scf7180000037711.90  | evm.model.unitig_63_quiver.373                                 |
| Group_9278     | hypothetical protein            | -                 | evm.model.scf7180000037928.40  | evm.model.unitig_0_quiver.945                                  |
| Group_9223     | hypothetical protein            | -                 | evm.model.scf7180000037867.74  | evm.model.unitig_0_quiver.1246                                 |
| Group_9152     | unnamed protein product         | -                 | evm.model.scf7180000037689.51  | evm.model.unitig_0_quiver.555                                  |
| Group_9149     | hypothetical protein            | -                 | evm.model.scf7180000037685.11  | evm.model.unitig_1_quiver.1219                                 |
| Group_9248     | unnamed protein product         | -                 | evm.model.scf7180000037912.50  | evm.model.unitig_0_quiver.1433                                 |
| Group_9179     | hypothetical protein            | -                 | evm.model.scf7180000037743.38  | evm.model.unitig_1_quiver.111                                  |
| Group_9171     | hypothetical protein            | -                 | evm.model.scf7180000037725.12  | evm.model.unitig_0_quiver.305                                  |
| Group_9138     | hypothetical protein            | -                 | evm.model.scf7180000037665.31  | evm.model.unitig_2_quiver.1075                                 |
| Group_9251     | hypothetical protein            | -                 | evm.model.scf7180000037912.89  | evm.model.unitig_0_quiver.1475                                 |
| Group_9184     | hypothetical protein            | -                 | evm.model.scf7180000037830.56  | evm.model.unitig_63_quiver.1035                                |
| Group_9146     | MFS monocarboxylate transporter | -                 | evm.model.scf7180000037681.86  | evm.model.unitig_1_quiver.1137                                 |
| Group_0374     | hypothetical protein            | -                 | evm.model.scf7180000037720.111 | evm.model.unitig_55_quiver.21,<br>evm.model.unitig_55_quiver.3 |



Supplementary Table S5. Variations in genomes of *A. niger* H915-1 from *A. niger* L2 and *A. niger* A1

|                    | SNP/Indel | SV        |          |           |                    |
|--------------------|-----------|-----------|----------|-----------|--------------------|
|                    |           | insertion | deletion | inversion | Tandem duplication |
| sites of variation | 1210      | 29        | 6        | 12        | 5                  |
| variant genes      | 57        | 22        | 2        | 7         | 4                  |

Table S6. Gene variations in genomes of *A. niger* L2 and *A. niger* A1 to *A. niger* H915-1 in SNP/indel analysis

| contig ID | position | gene ID                 | Change type                    | Nucleic acid variation                       | AA variation | Gene name                                         |
|-----------|----------|-------------------------|--------------------------------|----------------------------------------------|--------------|---------------------------------------------------|
| 1         | 1129361  | evm.model.1.311         | missense_variant               | Tca/Gca                                      | Ser598Ala    | Proline utilization trans-activator               |
| 1         | 1624442  | evm.model.1.443         | missense_variant               | Tgg/Ggg                                      | Trp237Gly    | ATP binding L-PSP endoribonuclease family protein |
| 1         | 1977948  | evm.model.1.561         | missense_variant               | Tcg/Gcg                                      | Ser433Ala    | unnamed protein product                           |
| 1         | 2561390  | evm.model.1.732         | frameshift_variant             | agc/agcA                                     |              | branched-chain-amino-acid aminotransferase        |
| 1         | 2561388  | evm.model.1.732         | frameshift_variant             | ccc/ccGc                                     |              | branched-chain-amino-acid aminotransferase        |
| 1         | 253805   | evm.model.1.76          | missense_variant               | Atc/Ctc                                      | Ile675Leu    | hypothetical protein                              |
| 1         | 2760046  | evm.model.1.766         | frameshift_variant             | cgg/cggT<br>AACACCGCCTCCAT<br>GCCGTTGGCGCCCC | Arg80_Gly81  | UPD-GlcNAc transporter (Mnn2-2)                   |
| unitig_0  | 4280803  | evm.model.unitig_0.1249 | disruptive_inframe_deletion    | GAGCGGCCGGATCC<br>CTCGTGGCAGGTGA<br>CGATG/A  |              | Fork head protein homolog 2                       |
| unitig_0  | 4410423  | evm.model.unitig_0.1291 | frameshift_variant             | ccc/Accc                                     |              | hypothetical protein                              |
| unitig_0  | 4410421  | evm.model.unitig_0.1291 | frameshift_variant+stop_gained | tac/taAc                                     |              | hypothetical protein                              |
| unitig_0  | 4587807  | evm.model.unitig_0.1343 | missense_variant               | Gat/Tat                                      | Asp225Tyr    | histone chaperone asf1 involved in gene silencing |
| unitig_0  | 5838066  | evm.model.unitig_0.1696 | frameshift_variant             | G/GT                                         |              | hypothetical protein                              |
| unitig_0  | 5838061  | evm.model.unitig_0.1696 | frameshift_variant             | cgg/cggT                                     |              | hypothetical protein                              |
| unitig_0  | 5905171  | evm.model.unitig_0.1717 | frameshift_variant             | cgatcgtctccggtcg/c                           |              | ubiquitin carboxyl-terminal hydrolase             |

| contig ID | position | gene ID                 | Change type                   | Nucleic acid variation                                                                                  | AA variation | Gene name                                      |
|-----------|----------|-------------------------|-------------------------------|---------------------------------------------------------------------------------------------------------|--------------|------------------------------------------------|
| unitig_0  | 5905170  | evm.model.unitig_0.1717 | frameshift_variant            | gc/g                                                                                                    |              | ubiquitin carboxyl-terminal hydrolase          |
| unitig_0  | 2100797  | evm.model.unitig_0.625  | missense_variant              | Acc/Ccc                                                                                                 | Thr59Pro     | Isonitrile hydratase                           |
| unitig_0  | 2267694  | evm.model.unitig_0.675  | missense_variant              | cTc/cCc                                                                                                 | Leu140Pro    | tRNA-specific adenosine deaminase subunit tad3 |
| unitig_0  | 2343478  | evm.model.unitig_0.703  | missense_variant              | tCc/tAc                                                                                                 | Ser659Tyr    | Mitochondrial escape protein 2                 |
| unitig_0  | 2797157  | evm.model.unitig_0.807  | frameshift_variant            | ccc/Accc                                                                                                |              | cytochrome P450 monooxygenase                  |
| unitig_0  | 3330384  | evm.model.unitig_0.983  | frameshift_variant            | tct/tctG                                                                                                |              | hypothetical protein                           |
| unitig_1  | 401272   | evm.model.unitig_1.103  | synonymous_variant            | ggA/ggG                                                                                                 | Gly492Gly    | Amino acid transporters                        |
| unitig_1  | 3555983  | evm.model.unitig_1.1041 | disruptive_inframe_insertion  | acc/aTCAcc                                                                                              |              | hypothetical protein                           |
| unitig_1  | 3781036  | evm.model.unitig_1.1114 | missense_variant              | Tcc/Ccc                                                                                                 | Ser109Pro    | hypothetical protein                           |
| unitig_1  | 4076579  | evm.model.unitig_1.1195 | inframe_insertion             | tct/ACTGGAGGCAG<br>CAACGGCtct                                                                           |              | hypothetical protein                           |
| unitig_1  | 4736044  | evm.model.unitig_1.1385 | intron_variant                | C/G                                                                                                     |              | C2H2 finger domain protein                     |
| unitig_1  | 4735854  | evm.model.unitig_1.1385 | intron_variant                | C/T                                                                                                     |              | C2H2 finger domain protein                     |
| unitig_1  | 524964   | evm.model.unitig_1.140  | frameshift_variant            | ccc/cAcc                                                                                                |              | pre-mRNA-splicing factor syf1                  |
| unitig_1  | 2530872  | evm.model.unitig_1.745  | missense_variant              | Agc/Cgc                                                                                                 | Ser88Arg     | CORD and CS domain protein                     |
| unitig_1  | 2988599  | evm.model.unitig_1.873  | synonymous_variant            | ccA/ccC                                                                                                 | Pro97Pro     | PBSP domain protein                            |
| unitig_1  | 3290487  | evm.model.unitig_1.969  | frameshift_variant+start_lost | TGGCCGTTTGTGG<br>GCCGGCGCCTGCGA<br>CTCGAGGATTCGGA<br>ACATCGCAACTGGT<br>AGCTCGTAATTCAT<br>GGTCACCGCCGGCC |              | ER-Golgi vesicle-tethering protein p115        |

| contig ID | position | gene ID                 | Change type                   | Nucleic acid variation                   | AA variation | Gene name                                      |
|-----------|----------|-------------------------|-------------------------------|------------------------------------------|--------------|------------------------------------------------|
|           |          |                         |                               | G/TGGCCG                                 |              |                                                |
| unitig_2  | 4237654  | evm.model.unitig_2.1270 | missense_variant              | caT/caG                                  | His329Gln    | succinate-semialdehyde dehydrogenase (NADP(+)) |
| unitig_2  | 4403439  | evm.model.unitig_2.1312 | stop_gained+inframe_insertion | tac/tacTAA                               |              | Pantothenate transporter liz1                  |
| unitig_2  | 1317528  | evm.model.unitig_2.405  | missense_variant              | Agc/Cgc                                  | Ser68Arg     | hypothetical protein                           |
| unitig_2  | 2229288  | evm.model.unitig_2.697  | missense_variant              | aTa/aGa                                  | Ile528Arg    | Early growth response protein 1-B              |
| unitig_2  | 2287481  | evm.model.unitig_2.713  | synonymous_variant            | ccA/ccC                                  | Pro50Pro     | hypothetical protein                           |
| unitig_2  | 2287463  | evm.model.unitig_2.713  | synonymous_variant            | ccT/ccC                                  | Pro44Pro     | hypothetical protein                           |
|           |          |                         |                               | CCTCCTCCTCCTCCT                          |              |                                                |
| unitig_2  | 3145846  | evm.model.unitig_2.963  | inframe_deletion              | CCTCCTCCTCCTCCT<br>CCTCCTC/C             |              | hypothetical protein                           |
|           |          |                         |                               |                                          |              | Heterokaryon incompatibility protein 6         |
| unitig_3  | 480299   | evm.model.unitig_3.153  | missense_variant              | aTa/aGa                                  | Ile527Arg    |                                                |
|           |          |                         |                               | Gggagcattggatcatta<br>ttctgcttcgagctag/G |              | isochorismatase family protein                 |
| unitig_3  | 1470785  | evm.model.unitig_3.411  | stop_lost+inframe_deletion    |                                          |              |                                                |
| unitig_3  | 1824862  | evm.model.unitig_3.529  | missense_variant              | Ccc/Acc                                  | Pro19Thr     | sorting nexin-3                                |
| unitig_3  | 2173543  | evm.model.unitig_3.624  | missense_variant              | Atc/Ctc                                  | Ile325Leu    | dimethylaniline monooxygenase                  |
| unitig_3  | 2173539  | evm.model.unitig_3.624  | missense_variant              | gGa/gTa                                  | Gly326Val    | dimethylaniline monooxygenase                  |
| unitig_3  | 2484191  | evm.model.unitig_3.722  | missense_variant              | aTg/aAg                                  | Met101Lys    | hypothetical protein                           |
| unitig_3  | 2731567  | evm.model.unitig_3.784  | missense_variant              | gaT/gaG                                  | Asp465Glu    | trimethylguanosine synthase                    |
| unitig_4  | 3605300  | evm.model.unitig_4.1030 | inframe_deletion              | Ggca/G                                   | Ala1390del   | Phospholipid-transporting ATPase               |
| unitig_4  | 97713    | evm.model.unitig_4.23   | frameshift_variant            | gtt/gttT                                 |              | aconitase family protein                       |
| unitig_4  | 97714    | evm.model.unitig_4.23   | frameshift_variant            | aac/aTac                                 |              | aconitase family protein                       |
| unitig_4  | 2177645  | evm.model.unitig_4.629  | intron_variant                | A/C                                      |              | cell pattern formation-associated              |

| contig ID | position | gene ID                | Change type                 | Nucleic acid variation | AA variation | Gene name                                                      |
|-----------|----------|------------------------|-----------------------------|------------------------|--------------|----------------------------------------------------------------|
| unitig_4  | 2172575  | evm.model.unitig_4.629 | intron_variant              | atT/at                 |              | protein stuA<br>cell pattern formation-associated protein stuA |
| unitig_4  | 2177840  | evm.model.unitig_4.629 | intron_variant              | A/T                    |              | cell pattern formation-associated protein stuA                 |
| unitig_4  | 270070   | evm.model.unitig_4.77  | splice_region_variant       | c/Ct                   |              | Uncharacterized transcriptional regulatory protein             |
| unitig_4  | 2808789  | evm.model.unitig_4.809 | missense_variant            | Agc/Cgc                | Ser151Arg    | Flavin-containing monooxygenase                                |
| unitig_4  | 3229522  | evm.model.unitig_4.928 | intron_variant              | T/A                    |              | Alpha-amylase A                                                |
| unitig_5  | 496859   | evm.model.unitig_5.165 | frameshift_variant          | ccc/ccAc               |              | mRNA export protein mlo3                                       |
| unitig_5  | 496856   | evm.model.unitig_5.165 | frameshift_variant          | gcc/gcAc               |              | mRNA export protein mlo3                                       |
| unitig_5  | 496858   | evm.model.unitig_5.165 | frameshift_variant          | ccc/cAcc               |              | mRNA export protein mlo3                                       |
| unitig_5  | 1068715  | evm.model.unitig_5.347 | missense_variant            | tTg/tGg                | Leu616Trp    | hypothetical protein                                           |
| unitig_5  | 1521187  | evm.model.unitig_5.491 | frameshift_variant          | gcc/gccA               |              | Cutinase transcription factor 1 alpha                          |
| unitig_5  | 1521189  | evm.model.unitig_5.491 | frameshift_variant          | gcc/gAcc               |              | Cutinase transcription factor 1 alpha                          |
| unitig_5  | 2095316  | evm.model.unitig_5.644 | frameshift_variant          | ccg/ccAg               |              | ubiquitin-conjugating enzyme E2-18 kDa                         |
| unitig_5  | 2095314  | evm.model.unitig_5.644 | frameshift_variant          | ccg/Accg               |              | ubiquitin-conjugating enzyme E2-18 kDa                         |
| unitig_5  | 2171271  | evm.model.unitig_5.671 | synonymous_variant          | ccA/ccC                | Pro321Pro    | cytokinesis protein 3                                          |
| unitig_6  | 1280151  | evm.model.unitig_6.311 | missense_variant            | gAg/gGg                | Glu358Gly    | Histidine protein methyltransferase 1                          |
| unitig_6  | 2041466  | evm.model.unitig_6.537 | missense_variant            | gAg/gGg                | Glu184Gly    | hypothetical protein                                           |
| unitig_6  | 2828319  | evm.model.unitig_6.787 | frameshift_variant          | cca/Acca               |              | tfdA family oxidoreductase                                     |
| unitig_6  | 2964360  | evm.model.unitig_6.833 | disruptive_inframe_deletion | caacaacag/cag          |              | unnamed protein product                                        |

| contig ID | position | gene ID                 | Change type           | Nucleic acid variation | AA variation | Gene name                                |
|-----------|----------|-------------------------|-----------------------|------------------------|--------------|------------------------------------------|
| unitig_3  | 789515   | evm.model.unitig_3.236  | splice_region_variant | GTA/G                  |              | hypothetical protein                     |
| unitig_0  | 2658818  | evm.model.unitig_0.772  | splice_region_variant | GCATCATC/GCATC         |              | riboflavin kinase                        |
| unitig_5  | 574639   | evm.model.unitig_5.194  | frameshift_variant    | CAG/C                  |              | hypothetical protein                     |
| unitig_0  | 5905186  | evm.model.unitig_0.1717 | frameshift_variant    | GATCGTCTCCGGTC<br>T/G  |              | ubiquitin carboxyl-terminal<br>hydrolase |
| unitig_0  | 2269725  | evm.model.unitig_0.676  | inframe_deletion      | TGCGGC/TGC             |              | hypothetical protein                     |

Supplementary Table S7. Gene variations in genomes of *A. niger* L2 and *A. niger* A1 to *A. niger* H915-1 in SV analysis

| Gene ID of H915-1       | Gene function                                       | Variation type     | nucleic acid change length(bp) | Variation position with gene |
|-------------------------|-----------------------------------------------------|--------------------|--------------------------------|------------------------------|
| evm.model.unitig_2.1148 | unnamed protein product                             | Tandom duplication | 496                            | in frame                     |
| evm.model.unitig_1.848  | DNA repair protein (Rad57)                          | Tandom duplication | 5498                           | in frame                     |
| evm.model.unitig_6.117  | GRAM domain protein                                 | Tandom duplication | 337                            | in frame                     |
| evm.model.unitig_4.408  | two-component system protein A                      | Tandom duplication | 811                            | promoter                     |
| evm.model.1.1050        | plant senescence-associated protein                 | Inversion          | 49412                          | in frame                     |
| evm.model.unitig_2.196  | lipin Smp2                                          | Inversion          | 1007                           | in frame                     |
| evm.model.unitig_2.197  | transcription initiation factor TFIID, 31kD subunit | Inversion          | 1007                           | promoter                     |
| evm.model.unitig_2.314  | non-hemolytic phospholipase C precursor             | Inversion          | 688                            | promoter                     |
| evm.model.unitig_2.1102 | hypothetical protein                                | Inversion          | 104                            | promoter                     |
| evm.model.unitig_1.890  | epoxide hydrolase                                   | Inversion          | 783                            | in frame                     |
| evm.model.unitig_1.891  | 60S ribosomal protein L5                            | Inversion          | 783                            | in frame                     |
| evm.model.1.341         | unnamed protein product                             | Insersion          | 211                            | promoter                     |
| evm.model.1.382         | hypothetical protein                                | Insersion          | 220                            | in frame                     |
| evm.model.1.1046        | hypothetical protein                                | Insersion          | 97                             | in frame                     |
| evm.model.1.1047        | hypothetical protein                                | Insersion          | 195                            | in frame                     |
| evm.model.1.1048        | hypothetical protein                                | Insersion          | 105                            | in frame                     |
| evm.model.1.1050        | plant senescence-associated protein                 | Insersion          | 263                            | in frame                     |
| evm.model.unitig_2.667  | hypothetical protein                                | Insersion          | 159                            | in frame                     |
| evm.model.unitig_2.743  | pre-mRNA-splicing factor cwc22                      | Insersion          | 253                            | promoter                     |
| evm.model.unitig_1.73   | hypothetical protein                                | Insersion          | 258                            | in frame                     |
| evm.model.unitig_1.141  | Sec7 domain protein                                 | Insersion          | 280                            | in frame                     |
| evm.model.unitig_1.788  | unnamed protein product                             | Insersion          | 85                             | promoter                     |
| evm.model.unitig_1.789  | unnamed protein product                             | Insersion          | 85                             | promoter                     |

| Gene ID of H915-1       | Gene function                                     | Variation type | nucleic acid change length(bp) | Variation position with gene |
|-------------------------|---------------------------------------------------|----------------|--------------------------------|------------------------------|
| evm.model.unitig_1.1260 | RNA-splicing protein MRS3                         | Insersion      | 274                            | in frame                     |
| evm.model.unitig_0.113  | mRNA transport regulator (Mtr10)                  | Insersion      | 222                            | in frame                     |
| evm.model.unitig_0.311  | unnamed protein product                           | Insersion      | 277                            | promoter                     |
| evm.model.unitig_0.312  | hypothetical protein                              | Insersion      | 277                            | promoter                     |
| evm.model.unitig_0.635  | ABC transporter (Adp1)                            | Insersion      | 201                            | in frame                     |
| evm.model.unitig_0.1140 | phosphatidate cytidyltransferase                  | Insersion      | 81                             | in frame                     |
| evm.model.unitig_6.686  | calcofluor white hypersensitive protein precursor | Insersion      | 268                            | in frame                     |
| evm.model.unitig_5.900  | hypothetical protein                              | Insersion      | 85                             | in frame                     |
| evm.model.unitig_4.405  | hypothetical protein                              | Insersion      | 277                            | in frame                     |
| evm.model.unitig_4.679  | DNA-directed RNA polymerase II subunit RPB9       | Insersion      | 261                            | in frame                     |
| evm.model.unitig_1.969  | unnamed protein product                           | Deletion       | 80                             | in frame                     |
| evm.model.unitig_5.207  | hypothetical protein                              | Deletion       | 117                            | promoter                     |



Supplementary Table S8. Genes involving micro-colony formation

| gene ID of H915-1       | gene ID of CBS513.88 | gene function                                                | GenBank ID                      | SwissProt ID           |
|-------------------------|----------------------|--------------------------------------------------------------|---------------------------------|------------------------|
| evm.model.1.1107        | An03g02400           | spore-wall fungal hydrophobin dewA                           | gi 145234977 ref XP_001390137.1 | sp P52750 DEWA_EMENI   |
| evm.model.1.1139        | An03g01820           | polyketide synthase                                          | gi 317028440 ref XP_001390084.2 | sp Q12397 STCA_EMENI   |
| evm.model.1.139         | An04g08500           | hydrophobin                                                  | gi 145258896 ref XP_001402208.1 | sp P28346 RODL_EMENI   |
| evm.model.1.17          | An04g10030           | polyketide synthase                                          | gi 317038885 ref XP_001402359.2 | sp Q9Y8A5 LNKS_ASPT    |
| evm.model.1.61          | An04g09530           | Conidial yellow pigment biosynthesis polyketide synthase     | gi 350631780 gb EHA20150.1      | sp Q03149 WA_EMENI     |
| evm.model.1.820         | An03g06380           | polyketide synthase                                          | gi 317028699 ref XP_001390513.2 | sp Q4WAZ9 NRP14_AS PFU |
| evm.model.1.887         | An03g05440           | Conidial yellow pigment biosynthesis polyketide synthase     | gi 134058112 emb CAK38306.1     | sp Q03149 WA_EMENI     |
| evm.model.1.909         | An03g05140           | polyketide synthase                                          | gi 317028624 ref XP_001390395.2 | sp Q0C8M3 LNKS_ASPTN   |
| evm.model.unitig_0.1081 | An02g10140           | Polyketide synthase PksJ                                     | gi 350634928 gb EHA23290.1      | sp P40806 PKSJ_BACSU   |
| evm.model.unitig_0.236  | An07g03340           | hydrophobin                                                  | gi 145237540 ref XP_001391417.1 | sp P28346 RODL_EMENI   |
| evm.model.unitig_1.406  | An08g08480           | Granaticin polyketide synthase putative ketoacyl reductase 2 | gi 358373461 dbj GAA90059.1     | sp P16543 DHK2_STRVN   |
| evm.model.unitig_2.264  | An01g11790           | nonribosomal peptide synthetase TdiA                         | gi 145230650 ref XP_001389589.1 | sp P40806 PKSJ_BACSU   |
| evm.model.unitig_2.964  | An09g01290           | Phthiocerol synthesis polyketide synthase type I PpsC        | gi 134054733 emb CAK43573.1     | sp P96202 PPSC_MYCTU   |
| evm.model.unitig_3.162  | An12g02730           | polyketide synthase                                          | gi 145246206 ref XP_001395352.1 | sp Q4WAZ9 NRP14_AS PFU |
| evm.model.unitig_3.167  | An12g02670           | Phthiocerol synthesis polyketide synthase type I PpsC        | gi 134080059 emb CAK41106.1     | sp P96202 PPSC_MYCTU   |
| evm.model.unitig_3.209  | An12g02050           | polyketide synthase                                          | gi 317033668 ref XP_001395291.2 | sp Q03149 WA_EMENI     |
| evm.model.unitig_3.667  | An11g07310           | polyketide synthase                                          | gi 145244871 ref XP_001394705.1 | sp Q03149 WA_EMENI     |

| gene ID of H915-1      | gene ID of CBS513.88 | gene function                                                                    | GenBank ID                      | SwissProt ID           |
|------------------------|----------------------|----------------------------------------------------------------------------------|---------------------------------|------------------------|
| evm.model.unitig_3.755 | An11g05960           | polyketide synthase                                                              | gi 317032924 ref XP_001394581.2 | sp Q9Y8A5 LNKS_ASPT    |
| evm.model.unitig_3.757 | An11g05940           | polyketide synthase                                                              | gi 145244150 ref XP_001394579.1 | sp Q0C8M3 LNKS_ASPTN   |
| evm.model.unitig_3.780 | An11g05570           | polyketide synthase                                                              | gi 317032887 ref XP_001394543.2 | sp Q0C8M3 LNKS_ASPTN   |
| evm.model.unitig_3.870 | An11g04280           | Catalytic activity: polyketide synthases                                         | gi 134079105 emb CAK40660.1     | sp Q4WAZ9 NRP14_AS PFU |
| evm.model.unitig_4.214 | An15g05090           | polyketide synthase                                                              | gi 317035844 ref XP_001397040.2 | sp Q4WAZ9 NRP14_AS PFU |
| evm.model.unitig_4.407 | An15g02130           | polyketide synthase                                                              | gi 145250477 ref XP_001396752.1 | sp Q0C8M3 LNKS_ASPTN   |
| evm.model.unitig_4.684 | An12g03950           | L-aminoadipate-semialdehyde dehydrogenase-phosphopantetheinyl transferase (npgA) | gi 145246440 ref XP_001395469.1 | sp Q9CQF6 ADPPT_MOUSE  |
| evm.model.unitig_4.900 | An12g07070           | polyketide synthase                                                              | gi 317033991 ref XP_001395761.2 | sp Q9Y8A5 LNKS_ASPT    |
| evm.model.unitig_4.901 | An12g07070           | Similarity to polyketide synthase PKS1                                           | gi 134080488 emb CAK46336.1     | sp Q4WAZ9 NRP14_AS PFU |
| evm.model.unitig_5.198 | An14g04860           | Catalytic activity: polyketide synthases                                         | gi 134081790 emb CAK42046.1     | sp Q03131 ERYA1_SACER  |
| evm.model.unitig_5.499 | An14g00830           | phosphopantetheinyl transferase PptB                                             | gi 317034610 ref XP_001400712.2 | -                      |
| evm.model.unitig_5.672 | An09g05730           | Conidial yellow pigment biosynthesis polyketide synthase                         | gi 134078436 emb CAL00851.1     | sp Q03149 WA_EMENI     |
| evm.model.unitig_5.720 | An09g05110           | Polyketide synthase PksJ                                                         | gi 134078372 emb CAK40363.1     | sp P40806 PKSJ_BACSU   |
| evm.model.unitig_5.950 | An09g01860           | Conidial yellow pigment biosynthesis polyketide synthase                         | gi 350639884 gb EHA28237.1      | sp Q03149 WA_EMENI     |

Supplementary Table S9. Regulation of genes involved main heteroacids formation

| EC number   | gene ID of H915-1      | gene ID of CBS513.88 | Gene function                | FPKM-6h | FPKM-12h | FPKM-24h | FPKM-36h | FPKM-48h |
|-------------|------------------------|----------------------|------------------------------|---------|----------|----------|----------|----------|
| EC 4.1.1.2  | evm.model.1.1180       | An03g01140           | oxalate decarboxylase OxdC   | 10.0074 | 514.407  | 2999.5   | 2018.14  | 2832.48  |
| EC 1.1.1.27 | evm.model.1.153        | An04g08220           | L-lactate dehydrogenase      | 1.83775 | 0.789    | 0.192629 | 0        | 0.16791  |
| EC 6.2.1.1  | evm.model.1.340        | An04g05620           | acetyl-CoA synthetase        | 400.783 | 146.2    | 183.762  | 240.954  | 179.627  |
| EC 1.1.99.1 | evm.model.unitig_0.36  | An07g00450           | Glucose oxidase              | 792.581 | 7.59982  | 5.52318  | 9.00983  | 12.9734  |
| EC 3.1.2.1  | evm.model.unitig_6.429 | An16g07110           | acetyl-CoA hydrolase         | 2299.17 | 33.862   | 32.829   | 16.3067  | 13.3424  |
| EC 3.7.1.1  | evm.model.unitig_6.59  | An10g00820           | oxaloacetate acetylhydrolase | 7968.16 | 33.4376  | 4.34472  | 5.28545  | 6.43708  |

Supplementary Table S10. Transcription levels of genes involving cell wall synthesis during citrate fermentation.

| gene ID of H915-1       | gene ID of CBS<br>513.88 | gene function                                | abbrevi<br>ation | FPKM-6h | FPKM-12h | FPKM-24h | FPKM-36h | FPKM-48h |
|-------------------------|--------------------------|----------------------------------------------|------------------|---------|----------|----------|----------|----------|
| <b>Gas-family</b>       |                          |                                              |                  |         |          |          |          |          |
| evm.model.unitig_3.549  | An02g03070               | 1,3-beta-glucanosyltransferase               | GelC             | 433.688 | 266.047  | 120.248  | 156.893  | 114.367  |
| evm.model.unitig_5.1027 | An09g00670               | 1,3-beta-glucanosyltransferase               | GelD             | 347.75  | 1183.05  | 1546.35  | 1636.47  | 2032.39  |
| evm.model.1.835         | An03g06220               | 1,3-beta-glucanosyltransferase               | GelE             | 7.98677 | 6.53206  | 7.28515  | 5.65486  | 7.23761  |
| evm.model.unitig_6.497  | An16g06120               | 1,3-beta-glucanosyltransferase               | GelF             | 0       | 0.142663 | 0.424798 | 0.281753 | 0.251436 |
| evm.model.unitig_6.32   | An10g00400               | 1,3-beta-glucanosyltransferase               | GelA             | 182.41  | 71.739   | 8.32015  | 47.2731  | 24.2603  |
| evm.model.unitig_1.1003 | An08g07350               | 1,3-beta-glucanosyltransferase               | GelB             | 124.206 | 108.339  | 124.296  | 93.5029  | 76.1817  |
| evm.model.unitig_0.1147 | An02g09050               | 1,3-beta-glucanosyltransferase               | GelG             | 3.37788 | 4.13736  | 4.94468  | 6.27805  | 7.90065  |
| <b>Bgl-family</b>       |                          |                                              |                  |         |          |          |          |          |
| evm.model.unitig_1.737  | An08g03580               | Glucan 1,3-beta-glucosidase                  | BgtA             | 39.9038 | 53.5506  | 16.7324  | 190.818  | 99.3332  |
| evm.model.1.898         | An03g05290               | Probable glucan<br>endo-1,3-beta-glucosidase | eglC             | 67.2244 | 114.701  | 85.5947  | 143.378  | 88.2422  |
| evm.model.unitig_0.323  | An07g04650               | Putative glucan<br>endo-1,3-beta-glucosidase | BtgC             | 29.6338 | 19.1013  | 31.2696  | 14.117   | 17.8292  |
| evm.model.unitig_1.1272 | An06g01530               | Probable family 17 glucosidase               | Scw              | 3.04155 | 1.80463  | 0.659209 | 0.883687 | 0.776761 |
| evm.model.unitig_6.431  | An16g07040               | Probable beta-glucosidase btgE               | BtgE             | 69.5802 | 95.1163  | 104.077  | 67.5617  | 63.5846  |
| evm.model.unitig_1.986  | An08g07090               | SUN domain protein (Adg3)                    |                  | 73.0387 | 67.3362  | 105.523  | 49.8541  | 74.4551  |
| evm.model.unitig_0.188  | An07g02730               | SUN domain protein (Uth1)                    |                  | 187.914 | 322.05   | 321.125  | 232.741  | 228.9    |
| <b>Crh1-family</b>      |                          |                                              |                  |         |          |          |          |          |
| evm.model.unitig_3.1068 | An11g01540               | Probable glycosidase                         | CrhA             | 36.3163 | 20.197   | 39.8707  | 21.4461  | 20.5791  |
| evm.model.unitig_2.317  | An01g11010               | Probable glycosidase                         | CrhD             | 17.3047 | 88.3407  | 157.803  | 116.044  | 130.69   |
| evm.model.unitig_6.721  | An16g02850               | Probable glycosidase                         | CrhF             | 100.793 | 97.9857  | 38.6559  | 44.7124  | 28.122   |
| evm.model.unitig_4.200  | An15g05350               | Probable glycosidase                         | CrhG             | 11.2157 | 39.3065  | 39.1893  | 40.1699  | 34.7719  |

| gene ID of H915-1       | gene ID of CBS<br>513.88 | gene function                           | abbrevi<br>ation | FPKM-6h  | FPKM-12h | FPKM-24h | FPKM-36h | FPKM-48h |
|-------------------------|--------------------------|-----------------------------------------|------------------|----------|----------|----------|----------|----------|
| evm.model.unitig_0.522  | An07g07530               | Probable glycosidase                    | CrhB             | 97.9781  | 144.602  | 194.156  | 150.878  | 127.798  |
| evm.model.unitig_0.83   | An07g01160               | Probable glycosidase                    | CrhC             | 13.5355  | 120.163  | 237.258  | 116.55   | 180.128  |
| evm.model.unitig_0.1055 | An02g10490               | probable glycosidase                    |                  | 40.9125  | 31.2089  | 48.6761  | 49.0684  | 61.722   |
| evm.model.unitig_2.883  | An01g03090               | Putative<br>endo-1,3(4)-beta-glucanase  | EngA             | 31.8375  | 30.7227  | 33.1075  | 56.3619  | 119.447  |
| evm.model.unitig_2.863  | An01g03340               | Probable endo-beta-1,4-glucanase<br>A   |                  | 584.567  | 502.49   | 115.875  | 112.818  | 112.276  |
| evm.model.unitig_0.1757 | An02g00850               | Probable<br>endo-1,3(4)-beta-glucanase  |                  | 92.423   | 103.935  | 102.81   | 68.4599  | 46.2662  |
| evm.model.unitig_5.348  | An14g02760               | endo-1,4-beta-glucanase precursor       |                  | 7071.84  | 1027.03  | 99.331   | 169.691  | 43.2697  |
| evm.model.unitig_4.225  | An15g04900               | Probable endo-beta-1,4-glucanase        |                  | 17.0986  | 2.44082  | 2.24502  | 0.604792 | 0.363236 |
| evm.model.unitig_1.260  | An18g04100               | Probable glucan<br>1,3-beta-glucosidase | ExgA             | 3.16418  | 1.7518   | 1.89166  | 5.14283  | 7.07359  |
| evm.model.unitig_3.651  | An11g07660               | Probable glucan<br>1,3-beta-glucosidase | ExgB             | 39.2042  | 26.8141  | 35.7971  | 24.4634  | 24.3788  |
| evm.model.unitig_1.552  | An08g01100               | Probable glucan<br>1,3-beta-glucosidase | ExgC             | 15.4429  | 36.4156  | 43.8723  | 34.9773  | 51.9825  |
| evm.model.unitig_1.1420 | An06g02060               | Probable glucan<br>1,3-beta-glucosidase | ExgD             | 0        | 0.204065 | 0        | 0        | 0        |
| evm.model.unitig_2.209  | An01g12450               | Glucan 1,3-beta-glucosidase             | BxgA             | 344.399  | 551.739  | 519.35   | 526.324  | 403.968  |
| evm.model.unitig_0.884  | An02g13180               | Glucan endo-1,3-beta-glucosidase        | BgxB             | 5.10612  | 9.01723  | 5.68684  | 12.8277  | 28.7822  |
| evm.model.unitig_2.1411 | An19g00090               | Glucan 1,3-beta-glucosidase             | BgxC             | 0.685964 | 0.047614 | 0        | 0        | 0        |
| <b>Ags-family</b>       |                          |                                         |                  |          |          |          |          |          |
| evm.model.1.29          | An04g09890               | Cell wall alpha-1,3-glucan synthase     | AgsA             | 169.943  | 282.768  | 282.946  | 317.366  | 285.498  |

| gene ID of H915-1       | gene ID of CBS<br>513.88 | gene function                        | abbrevi<br>ation | FPKM-6h  | FPKM-12h | FPKM-24h | FPKM-36h | FPKM-48h |
|-------------------------|--------------------------|--------------------------------------|------------------|----------|----------|----------|----------|----------|
| evm.model.unitig_0.1588 | An02g03260               | Cell wall alpha-1,3-glucan synthase  | AgsD             | 2.23031  | 8.82718  | 3.48992  | 64.9818  | 35.9973  |
| evm.model.unitig_5.859  | An09g03070               | Cell wall alpha-1,3-glucan synthase  | AgsE             | 47.7876  | 54.046   | 35.0288  | 63.1913  | 35.827   |
| evm.model.unitig_3.182  | An12g02450               | Cell wall alpha-1,3-glucan synthase  | AgsC             | 24.1429  | 144.188  | 172.476  | 133.579  | 108.774  |
| evm.model.unitig_4.19   | An15g07810               | Cell wall alpha-1,3-glucan synthase  | AgsB             | 47.6622  | 157.271  | 21.0596  | 146.674  | 59.1841  |
| evm.model.unitig_6.619  | An16g04200               | GTP-binding protein rho2             | RhoB             | 173.942  | 221.408  | 234.063  | 296.498  | 289.229  |
| <b>Agt-family</b>       |                          |                                      |                  |          |          |          |          |          |
| evm.model.unitig_3.181  | An12g02460               | Acid alpha-amylase                   | agtB             | 94.2973  | 297.199  | 419.9    | 384.096  | 358.325  |
| evm.model.unitig_4.20   | An15g07800               | Alpha-amylase A type-3               | agtC             | 13.2914  | 44.1562  | 6.93325  | 44.1816  | 14.4295  |
| evm.model.unitig_5.858  | An09g03100               | Alpha-amylase A type-3               | agtA             | 122.561  | 70.9253  | 49.7084  | 24.9631  | 23.0356  |
| <b>Agn-family</b>       |                          |                                      |                  |          |          |          |          |          |
| evm.model.unitig_0.592  | An07g08640               | Glucan endo-1,3-alpha-glucosidas     | AgnB             | 5.903    | 7.82034  | 7.96088  | 8.96181  | 12.1774  |
| evm.model.unitig_5.633  | An09g06260               | Glucan endo-1,3-alpha-glucosidase    | AgnC             | 44.5241  | 31.5329  | 34.4453  | 52.983   | 41.7625  |
| evm.model.unitig_1.1164 | An08g09610               | Glucan endo-1,3-alpha-glucosidase    | AgnD             | 394.829  | 681.203  | 829.257  | 633.59   | 609.324  |
| evm.model.unitig_4.237  | An15g04760               | Glucan endo-1,3-alpha-glucosidase    | AgnE             | 0        | 0.381614 | 0.249933 | 3.3578   | 3.16017  |
| evm.model.unitig_3.229  | An12g01800               | Glucan endo-1,3-alpha-glucosidase    | AgnF             | 0.219113 | 0.143616 | 0        | 0.138753 | 0.305501 |
| evm.model.unitig_1.1330 | An06g00810               | Glucan endo-1,3-alpha-glucosidase    | AgnG             | 0.479026 | 0.266505 | 0.389786 | 0.450368 | 0.857455 |
| evm.model.1.257         | An04g06930               | Alpha-amylase A type-3               |                  | 49.5177  | 125.179  | 70.9508  | 114.751  | 105.761  |
| evm.model.unitig_2.126  | An01g13610               | Glucan<br>1,4-alpha-maltohexaosidase |                  | 27.7415  | 32.3324  | 23.5033  | 33.0255  | 29.6689  |
| evm.model.unitig_3.939  | An11g03340               | Acid alpha-amylase                   |                  | 9406.27  | 13401.3  | 9128.24  | 5542.22  | 9089.55  |
| <b>Chitin synthases</b> |                          |                                      |                  |          |          |          |          |          |
| evm.model.unitig_0.1646 | An02g02360               | Chitin synthase                      | CsmA             | 121.832  | 215.961  | 162.438  | 230.794  | 197.261  |
| evm.model.unitig_0.1647 | An02g02340               | Chitin synthase                      | CsmB             | 186.867  | 351.722  | 269.736  | 365.92   | 309.08   |

| gene ID of H915-1       | gene ID of CBS<br>513.88 | gene function                                  | abbrevi<br>ation | FPKM-6h  | FPKM-12h | FPKM-24h | FPKM-36h | FPKM-48h |
|-------------------------|--------------------------|------------------------------------------------|------------------|----------|----------|----------|----------|----------|
| evm.model.unitig_5.922  | An09g02290               | Chitin synthase                                | ChsD             | 57.1857  | 89.9635  | 75.9485  | 64.6078  | 57.0536  |
| evm.model.unitig_5.789  | An09g04010               | Chitin synthase                                | ChsB             | 280.053  | 335.388  | 272.588  | 292.975  | 242.53   |
| evm.model.unitig_4.1127 | An12g10380               | Chitin synthase                                | ChsE             | 21.7103  | 124.166  | 120.939  | 170.282  | 120.051  |
| evm.model.unitig_1.857  | An08g05290               | Chitin synthase                                | ChsG             | 1.16509  | 1.78908  | 3.47599  | 9.31298  | 14.9153  |
| evm.model.1.822         | An03g06360               | Chitin synthase                                | ChsF             | 0        | 0        | 0        | 0.07609  | 0        |
| evm.model.unitig_5.512  | An14g00660               | Chitin synthase                                | ChsC             | 55.6076  | 61.7083  | 101.074  | 30.7118  | 39.0433  |
| evm.model.unitig_0.385  | An07g05570               | Chitin synthase                                | ChsA             | 19.7451  | 32.3549  | 40.2954  | 45.9547  | 36.6638  |
| evm.model.unitig_1.801  | An08g04350               | Chitin synthase export chaperone               |                  | 81.3704  | 72.3258  | 141.221  | 129.138  | 149.885  |
| evm.model.unitig_5.927  | An09g02240               | Beta-hexosaminidase                            |                  | 98.8768  | 200.375  | 218.569  | 201.472  | 396.727  |
| evm.model.unitig_3.394  | An11g11050               | Chitin synthase regulatory factor              |                  | 34.1481  | 59.39    | 57.0364  | 75.1117  | 61.6274  |
| evm.model.unitig_4.975  | An12g07840               | Glucosamine 6-phosphate<br>N-acetyltransferase |                  | 150.507  | 196.763  | 146.381  | 206.745  | 169.775  |
| evm.model.unitig_4.979  | An12g07880               | Cell fusion protein cfr1                       |                  | 23.8721  | 20.7203  | 28.3961  | 23.3557  | 18.4492  |
| evm.model.unitig_4.951  | An12g07540               | Chitin synthase regulatory factor              |                  | 46.6925  | 49.4799  | 49.9162  | 49.4965  | 40.939   |
| evm.model.unitig_3.336  | An12g00480               | UDP-N-acetylglucosamine<br>pyrophosphorylase   |                  | 154.738  | 208.841  | 181.376  | 324.571  | 235.485  |
| <b>Chitinases</b>       |                          |                                                |                  |          |          |          |          |          |
| evm.model.unitig_5.620  | An09g06400               | Endochitinase                                  | CtcA             | 3.91932  | 2.93238  | 3.14127  | 5.3972   | 3.91676  |
| evm.model.unitig_5.660  | An09g05920               | Chitinase                                      | CtcB             | 4.71241  | 3.90778  | 4.69047  | 5.16489  | 7.70855  |
| evm.model.unitig_0.1325 | An02g07020               | Endochitinase                                  | CfcA             | 14.5408  | 18.3883  | 23.0106  | 44.9139  | 81.1113  |
| evm.model.unitig_1.1124 | An08g09030               | Endochitinase                                  | CfcB             | 1.44866  | 1.04379  | 0.514962 | 2.05976  | 5.11871  |
| evm.model.1.403         | An04g04670               | Endochitinase                                  | CfcC             | 42.213   | 128.615  | 62.0976  | 203.941  | 100.62   |
| evm.model.unitig_2.728  | An01g05360               | Endochitinase                                  | CfcD             | 15.4151  | 19.1235  | 18.3242  | 18.5392  | 25.1596  |
| evm.model.unitig_2.1410 | An19g00100               | class V chitinase                              | CfcG             | 0.163024 | 0.052542 | 0.051115 | 0.050851 | 0.045011 |

| gene ID of H915-1       | gene ID of CBS<br>513.88 | gene function                                 | abbrevi<br>ation | FPKM-6h | FPKM-12h | FPKM-24h | FPKM-36h | FPKM-48h |
|-------------------------|--------------------------|-----------------------------------------------|------------------|---------|----------|----------|----------|----------|
| evm.model.unitig_0.841  | An02g13580               | Chitinase                                     | Cfcl             | 3.3609  | 2.12306  | 4.6016   | 4.92571  | 9.3432   |
| evm.model.unitig_0.1536 | An02g03980               | Beta-glucan synthesis-associated<br>protein   | KsIA             | 20.6661 | 46.6438  | 22.2827  | 36.0561  | 38.607   |
| evm.model.unitig_4.612  | An05g00130               | Cell wall synthesis protein                   | KnIA             | 90.1949 | 95.653   | 97.6268  | 107.621  | 98.3554  |
| evm.model.unitig_0.110  | An07g01540               | Protein rot1                                  | RotA             | 77.4846 | 55.8693  | 104.477  | 62.237   | 75.1657  |
| <b>Dfg-family</b>       |                          |                                               |                  |         |          |          |          |          |
| evm.model.1.1206        | An03g00740               | Mannan<br>endo-1,6-alpha-mannosidase          | DfgB             | 1.35522 | 1.95428  | 2.6843   | 3.57772  | 5.54232  |
| evm.model.unitig_5.282  | An14g03520               | Mannan<br>endo-1,6-alpha-mannosidase          | DfgC             | 93.495  | 116.532  | 106.391  | 105.103  | 98.1553  |
| evm.model.unitig_2.647  | An01g06500               | Mannan<br>endo-1,6-alpha-mannosidase          | DfgD             | 4.32931 | 2.45921  | 0.853608 | 1.55632  | 1.87156  |
| evm.model.unitig_6.356  | An16g08090               | Mannan<br>endo-1,6-alpha-mannosidase          | DfgE             | 16.3897 | 35.1257  | 42.8621  | 60.157   | 55.5207  |
| evm.model.unitig_1.1363 | An06g00360               | Mannan<br>endo-1,6-alpha-mannosidase          | DfgF             | 16.8543 | 14.191   | 19.4463  | 10.9905  | 14.8966  |
| evm.model.unitig_0.1631 | An02g02660               | Putative mannan<br>endo-1,6-alpha-mannosidase | DfgG             | 7.41031 | 5.3498   | 2.91568  | 4.15995  | 2.58706  |
| evm.model.unitig_3.1087 | An11g01240               | Mannan<br>endo-1,6-alpha-mannosidase          | DfgH             | 74.8663 | 62.3018  | 59.9235  | 49.4836  | 26.1839  |
| evm.model.unitig_4.836  | An12g05930               | Putative mannan<br>endo-1,6-alpha-mannosidase | DfgI             | 0       | 0.52315  | 0.382449 | 0.628217 | 0.221378 |
| evm.model.1.48          | An04g09650               | Putative mannan<br>endo-1,6-alpha-mannosidase |                  | 0.94681 | 0.365253 | 0.534255 | 6.97958  | 16.3193  |



| gene ID of H915-1       | gene ID of CBS<br>513.88 | gene function                                       | abbrevi<br>ation | FPKM-6h  | FPKM-12h | FPKM-24h | FPKM-36h | FPKM-48h |
|-------------------------|--------------------------|-----------------------------------------------------|------------------|----------|----------|----------|----------|----------|
| evm.model.1.676         | An04g01230               | Protein ecm33                                       | EcmA             | 929.988  | 1203.71  | 1399.09  | 1203.41  | 1268.35  |
| <b>WSC-family</b>       |                          |                                                     |                  |          |          |          |          |          |
| evm.model.unitig_2.422  | An01g09460               | Cell wall integrity and stress response component 2 | WscA             | 235.559  | 273.829  | 290.222  | 268.634  | 311.975  |
| evm.model.unitig_0.288  | An07g04070               | Cell wall integrity and stress response component 4 | WscB             | 111.895  | 175.154  | 195.666  | 238.122  | 181.34   |
| <b>Rho-GEFs</b>         |                          |                                                     |                  |          |          |          |          |          |
| evm.model.unitig_0.356  | An07g05090               | Rho1 guanine nucleotide exchange factor             | RefA             | 52.8923  | 68.5687  | 68.44    | 74.6655  | 69.3745  |
| evm.model.unitig_4.350  | An15g02900               | Rho1 guanine nucleotide exchange factor             | RefB             | 25.4491  | 33.3459  | 35.4138  | 39.4765  | 35.9026  |
| evm.model.1.372         | An04g05150               | Rho guanine nucleotide exchange factor              | CefA             | 26.2798  | 32.4087  | 39.2074  | 41.5341  | 38.1165  |
| evm.model.unitig_1.1186 | An08g10040               | rho guanyl nucleotide exchange factor               | CefB             | 0.497884 | 0.319301 | 0.84013  | 0.615691 | 0.962403 |
| <b>Rho-GAPs</b>         |                          |                                                     |                  |          |          |          |          |          |
| evm.model.unitig_6.40   | An10g00490               | Rho-GTPase-activating protein                       | RapA             | 18.5192  | 20.8484  | 26.765   | 26.3171  | 24.8437  |
| evm.model.unitig_3.467  | An11g10060               | Probable Rho-GTPase-activating protein              | RapB             | 36.7498  | 54.8389  | 44.0932  | 60.9663  | 50.8077  |
| evm.model.unitig_4.343  | An15g03040               | Rho-type GTPase-activating protein                  | RapC             | 47.4675  | 66.5632  | 67.4757  | 70.7548  | 60.5539  |
| evm.model.unitig_2.1202 | An13g01020               | Probable Rho-type GTPase-activating protein         | RapD             | 26.01    | 35.5613  | 32.579   | 43.3829  | 30.0461  |
| evm.model.unitig_2.1189 | An13g00850               | Rho-GTPase-activating protein                       | RapE             | 28.6628  | 42.3099  | 40.4563  | 65.8285  | 42.576   |

| gene ID of H915-1          | gene ID of CBS<br>513.88 | gene function                                               | abbrevi<br>ation | FPKM-6h | FPKM-12h | FPKM-24h | FPKM-36h | FPKM-48h |
|----------------------------|--------------------------|-------------------------------------------------------------|------------------|---------|----------|----------|----------|----------|
| evm.model.unitig_1.870     | An08g05440               | Probable Rho-type<br>GTPase-activating protein              | CapA             | 14.5782 | 24.1364  | 24.0061  | 31.7156  | 21.2868  |
| evm.model.unitig_1.458     | An18g06730               | Probable Rho-type<br>GTPase-activating protein              | CapB             | 32.6111 | 46.9568  | 52.137   | 54.2704  | 45.0441  |
| <b>Rho-related GTPases</b> |                          |                                                             |                  |         |          |          |          |          |
| evm.model.unitig_5.148     | An14g05530               | GTP-binding protein                                         | RhoD             | 30.4013 | 25.9519  | 34.4187  | 18.4885  | 12.8308  |
| evm.model.unitig_3.469     | An11g10030               | Ras-related C3 botulinum toxin<br>substrate                 | RacA             | 38.7862 | 71.7136  | 55.0574  | 128.527  | 86.0568  |
| evm.model.unitig_3.513     | An11g09620               | GTP-binding protein                                         | RhoC             | 26.4742 | 33.7911  | 26.6553  | 46.7332  | 33.9395  |
| evm.model.unitig_1.135     | An18g02400               | Protein kinase C with putative<br>function in CWI signaling | PkcA             | 51.7412 | 70.6264  | 87.8224  | 82.0698  | 78.4548  |
| <b>MAPKKs</b>              |                          |                                                             |                  |         |          |          |          |          |
| evm.model.unitig_0.1339    | An02g06830               | MAP kinase kinase kinase                                    | BckA             | 11.3569 | 19.4852  | 21.0069  | 28.0421  | 21.2434  |
| evm.model.unitig_6.186     | An17g01280               | MAP kinase kinase kinase                                    | SteK             | 49.5722 | 70.2375  | 66.6273  | 79.3403  | 60.3522  |
| evm.model.unitig_1.709     | An08g03240               | MAP kinase kinase kinase                                    | SskB             | 50.9855 | 82.7021  | 75.2767  | 87.2121  | 81.6301  |
| <b>MAPKs</b>               |                          |                                                             |                  |         |          |          |          |          |
| evm.model.unitig_1.229     | An18g03740               | MAP kinase kinase                                           | MkkA             | 53.0267 | 108.27   | 108.346  | 163.971  | 109.647  |
| evm.model.unitig_3.420     | An11g10690               | MAP kinase kinase                                           | SteG             | 6.09445 | 7.6951   | 8.00354  | 9.9322   | 7.35432  |
| evm.model.unitig_2.316     | An01g11080               | Protein kinase wis1                                         | PbsB             | 32.8318 | 78.593   | 87.6352  | 118.403  | 117.221  |
| <b>MAPKs</b>               |                          |                                                             |                  |         |          |          |          |          |
| evm.model.unitig_2.418     | An01g09520               | Mitogen-activated protein kinase                            | MpkA             | 146.664 | 130.995  | 147.38   | 140.736  | 119.403  |
| evm.model.unitig_1.1235    | An08g10670               | Mitogen-activated protein kinase                            | FusC             | 111.246 | 145.531  | 245.124  | 256.164  | 241.179  |
| evm.model.unitig_0.281     | An07g03980               | Mitogen-activated protein kinase                            | HogA             | 8.12914 | 8.77733  | 12.3331  | 7.79599  | 7.51126  |

| gene ID of H915-1                     | gene ID of CBS<br>513.88 | gene function                                         | abbrevi<br>ation | FPKM-6h  | FPKM-12h | FPKM-24h | FPKM-36h | FPKM-48h |
|---------------------------------------|--------------------------|-------------------------------------------------------|------------------|----------|----------|----------|----------|----------|
| evm.model.unitig_1.896                | An08g05850               | Mitogen-activated protein kinase                      | HogB             | 141.295  | 147.167  | 169.79   | 181.585  | 165.733  |
| evm.model.unitig_1.348                | An18g05270               | Mitogen-activated protein kinase                      | HogC             | 1.58693  | 0.774868 | 3.92005  | 6.72042  | 20.3115  |
| <b>MADS-BOX transcription factors</b> |                          |                                                       |                  |          |          |          |          |          |
| evm.model.unitig_0.945                | An02g12210               | Transcription factor RLM1                             | RlmA             | 7.26868  | 15.633   | 15.411   | 17.4989  | 13.7581  |
| evm.model.unitig_4.1026               | An12g08730               | Transcription factor of<br>morphogenesis              | McmA             | 191.85   | 147.766  | 153.792  | 152.946  | 136.861  |
| evm.model.1.139                       | An04g08500               | hydrophobin                                           | hypE             | 0.331532 | 1.60662  | 0.309212 | 0.320809 | 0.550592 |
| evm.model.unitig_0.236                | An07g03340               | hydrophobin                                           | hypF             | 24.6584  | 16.3423  | 25.2839  | 43.4444  | 55.1751  |
| <b>spore wall maturation proteins</b> |                          |                                                       |                  |          |          |          |          |          |
| evm.model.1.899                       | An03g05260               | fungal chitosanase                                    |                  | 23.2343  | 19.2568  | 8.30921  | 13.1914  | 6.97961  |
| <b>Others</b>                         |                          |                                                       |                  |          |          |          |          |          |
| evm.model.unitig_1.1270               | An06g01550               | 1,3-beta-glucan synthase<br>component                 | FksA             | 350.208  | 541.062  | 562.486  | 672.174  | 542.831  |
| evm.model.unitig_1.409                | An18g05980               | GTP-binding protein                                   | RhoA             | 525.453  | 604.953  | 574.374  | 782.461  | 649.664  |
| evm.model.unitig_5.501                | An14g00800               | Signaling mucin MSB2                                  | HkrA             | 38.4008  | 78.7296  | 84.9039  | 92.6592  | 74.5294  |
| evm.model.unitig_6.244                | An17g02120               | Glucan synthesis regulatory protein                   | KnrA             | 86.9143  | 95.0952  | 97.6845  | 93.8772  | 75.3459  |
| evm.model.unitig_3.1090               | An11g01190               | GPI-anchored cell wall protein Pst1                   |                  | 8.19626  | 33.0153  | 90.2154  | 96.7182  | 109.892  |
| evm.model.unitig_2.210                | An01g12440               | chitin binding protein                                |                  | 634.108  | 135.492  | 118.697  | 205.541  | 121.575  |
| evm.model.unitig_4.261                | An15g04570               | fungal cellulose binding domain<br>protein            |                  | 109.335  | 1.77699  | 1.51897  | 0.645444 | 0.189446 |
| evm.model.1.863                       | An03g05740               | Cellulose synthase catalytic subunit<br>[UDP-forming] |                  | 3.52841  | 6.39177  | 3.83371  | 5.4007   | 4.64119  |

Supplementary Table S11. Citrate production and yield of H915-1 and H915( $\Delta oah::hph$ )

| Strain                    | Titer (g L <sup>-1</sup> ) | Yield (g g <sup>-1</sup> %) |
|---------------------------|----------------------------|-----------------------------|
| H915-1                    | 129 ± 1.28                 | 95.78 ± 1.85                |
| H915( $\Delta oah::hph$ ) | 130 ± 2.82                 | 97.46 ± 0.79                |

The results shown were mean ± sd (n=3). Statistical significance was examined by T-test.
