# Supplementary material for: Comparative genomics and transcriptome analysis of Aspergillus niger and metabolic engineering for citrate production
Source: PubMed Central journal article supplement (PMC5247736; doi:10.1038/srep41040), 2017-01-20
Supplement: srep41040-s2.pdf [file srep41040-s2.pdf]

**Comparative genomics and transcriptome analysis of *Aspergillus niger* and metabolic engineering for citrate production**

Xian Yin<sup>a, b</sup>, Hyun-dong Shin<sup>c</sup>, Jianghua Li<sup>a, b</sup>, Guocheng Du<sup>a, b</sup>, Long Liu<sup>a, b§</sup>, Jian Chen<sup>a§§</sup>

<sup>a</sup>Key Laboratory of Industrial Biotechnology, Ministry of Education, Jiangnan University, Wuxi 214122, China

<sup>b</sup>Key Laboratory of Carbohydrate Chemistry and Biotechnology, Ministry of Education, Jiangnan University, Wuxi 214122, China

<sup>c</sup>School of Chemical and Biomolecular Engineering, Georgia Institute of Technology, Atlanta, GA 30332, USA

Corresponding authors: <sup>§</sup>Long Liu, Tel.: +86-510-85918312, Fax: +86-510-85918309, E-mail:

[longliu@jiangnan.edu.cn](mailto:longliu@jiangnan.edu.cn); <sup>§§</sup>Jian Chen, Tel.: +86-510-85913661, Fax: +86-510-85910799, E-mail:

[jchen@jiangnan.edu.cn](mailto:jchen@jiangnan.edu.cn)

Supplementary Table S2. Gene ID matching of H915-1 and CBS513.88

| Gene ID of H915-1 | Gene ID of 513.88 |
|-------------------|-------------------|
| evm.model.1.1     | An04g10300        |
| evm.model.1.10    | An04g10110        |
| evm.model.1.100   | An04g09030        |
| evm.model.1.1000  | An03g03820        |
| evm.model.1.1001  | An03g03810        |
| evm.model.1.1002  | An03g03800        |
| evm.model.1.1003  | An03g03800        |
| evm.model.1.1004  | An03g03780        |
| evm.model.1.1005  | An03g03770        |
| evm.model.1.1006  | An03g03760        |
| evm.model.1.1007  | An03g03750        |
| evm.model.1.1008  | An03g03740        |
| evm.model.1.1009  | An03g03730        |
| evm.model.1.101   | An04g09020        |
| evm.model.1.1010  | An03g03720        |
| evm.model.1.1011  | An03g03710        |
| evm.model.1.1012  | An03g03700        |
| evm.model.1.1013  | An03g03670        |
| evm.model.1.1014  | An03g03660        |
| evm.model.1.1015  | An03g03650        |
| evm.model.1.1016  | An03g03640        |
| evm.model.1.1017  | An03g03620        |
| evm.model.1.1018  | An03g03600        |
| evm.model.1.1019  | An03g03590        |
| evm.model.1.102   | An04g09010        |
| evm.model.1.1020  | An03g03580        |
| evm.model.1.1021  | An03g03570        |
| evm.model.1.1022  | An03g03560        |
| evm.model.1.1023  | An03g03550        |
| evm.model.1.1024  | An03g03540        |
| evm.model.1.1025  | An03g03530        |
| evm.model.1.1026  | An03g03520        |
| evm.model.1.1027  | An03g03510        |
| evm.model.1.1028  | An03g03500        |
| evm.model.1.1029  | An03g03490        |
| evm.model.1.103   | -                 |
| evm.model.1.1030  | An03g03480        |
| evm.model.1.1031  | An03g03470        |
| evm.model.1.1032  | An03g03460        |
| evm.model.1.1033  | An03g03450        |
| evm.model.1.1035  | An03g03420        |
| evm.model.1.1037  | An03g03030        |

---

| Gene ID of H915-1 | Gene ID of 513.88 |
|-------------------|-------------------|
| evm.model.1.1038  | An03g03360        |
| evm.model.1.1039  | An03g03350        |
| evm.model.1.104   | An04g09000        |
| evm.model.1.1040  | An03g03330        |
| evm.model.1.1041  | An03g03300        |
| evm.model.1.1042  | An03g03290        |
| evm.model.1.1043  | An03g03270        |
| evm.model.1.1049  | -                 |
| evm.model.1.105   | An04g08990        |
| evm.model.1.1050  | -                 |
| evm.model.1.1051  | An03g03130        |
| evm.model.1.1053  | -                 |
| evm.model.1.1055  | -                 |
| evm.model.1.1056  | An03g03050        |
| evm.model.1.1057  | An03g03030        |
| evm.model.1.1058  | An03g03010        |
| evm.model.1.1059  | An03g03000        |
| evm.model.1.106   | An04g08970        |
| evm.model.1.1060  | An03g02990        |
| evm.model.1.1061  | An03g02980        |
| evm.model.1.1062  | An03g02970        |
| evm.model.1.1063  | An03g02960        |
| evm.model.1.1064  | An03g02950        |
| evm.model.1.1065  | An03g02940        |
| evm.model.1.1066  | An03g02930        |
| evm.model.1.1067  | An03g02920        |
| evm.model.1.1068  | An03g02910        |
| evm.model.1.1069  | An03g02890        |
| evm.model.1.107   | An15g05530        |
| evm.model.1.1070  | -                 |
| evm.model.1.1071  | An03g02880        |
| evm.model.1.1072  | An03g02870        |
| evm.model.1.1073  | An03g02850        |
| evm.model.1.1074  | An03g02840        |
| evm.model.1.1075  | An03g02830        |
| evm.model.1.1076  | An03g02810        |
| evm.model.1.1077  | An03g02800        |
| evm.model.1.1079  | An03g02780        |
| evm.model.1.108   | An04g08940        |
| evm.model.1.1080  | An03g02770        |
| evm.model.1.1081  | An03g02750        |
| evm.model.1.1082  | An03g02720        |
| evm.model.1.1083  | An03g02700        |

---

---

| Gene ID of H915-1 | Gene ID of 513.88 |
|-------------------|-------------------|
| evm.model.1.1084  | An03g02690        |
| evm.model.1.1085  | An03g02680        |
| evm.model.1.1086  | An03g02670        |
| evm.model.1.1087  | An03g02660        |
| evm.model.1.1088  | An03g02650        |
| evm.model.1.1089  | An12g04690        |
| evm.model.1.109   | An04g08920        |
| evm.model.1.1091  | An03g02630        |
| evm.model.1.1092  | An03g02620        |
| evm.model.1.1093  | An03g02610        |
| evm.model.1.1094  | An03g02600        |
| evm.model.1.1095  | An03g02580        |
| evm.model.1.1096  | An03g02570        |
| evm.model.1.1097  | An03g02560        |
| evm.model.1.1098  | An03g02550        |
| evm.model.1.1099  | An03g02540        |
| evm.model.1.110   | An04g08900        |
| evm.model.1.1100  | An03g02540        |
| evm.model.1.1101  | An03g02530        |
| evm.model.1.1102  | An03g02510        |
| evm.model.1.1103  | An03g02500        |
| evm.model.1.1104  | An03g02490        |
| evm.model.1.1105  | An03g02480        |
| evm.model.1.1106  | An03g02430        |
| evm.model.1.1107  | An03g02400        |
| evm.model.1.1108  | An03g02380        |
| evm.model.1.1109  | An03g02330        |
| evm.model.1.111   | An04g08890        |
| evm.model.1.1110  | An03g02320        |
| evm.model.1.1111  | An03g02300        |
| evm.model.1.1112  | An03g02280        |
| evm.model.1.1113  | An03g02270        |
| evm.model.1.1114  | An03g02260        |
| evm.model.1.1115  | An03g02230        |
| evm.model.1.1116  | An03g02190        |
| evm.model.1.1117  | An03g02180        |
| evm.model.1.1118  | An03g02160        |
| evm.model.1.1119  | An03g02130        |
| evm.model.1.112   | An04g08860        |
| evm.model.1.1120  | An03g02120        |
| evm.model.1.1121  | An03g02100        |
| evm.model.1.1122  | An03g02090        |
| evm.model.1.1123  | An03g02080        |

---

---

| Gene ID of H915-1 | Gene ID of 513.88 |
|-------------------|-------------------|
| evm.model.1.1124  | An03g02070        |
| evm.model.1.1125  | An03g02060        |
| evm.model.1.1126  | An03g02040        |
| evm.model.1.1127  | An03g02000        |
| evm.model.1.1128  | An03g01950        |
| evm.model.1.1129  | An03g01940        |
| evm.model.1.113   | An04g08840        |
| evm.model.1.1130  | An03g01900        |
| evm.model.1.1131  | An03g01900        |
| evm.model.1.1133  | An03g01890        |
| evm.model.1.1134  | An03g01880        |
| evm.model.1.1135  | An03g01880        |
| evm.model.1.1136  | An03g01860        |
| evm.model.1.1137  | An03g01850        |
| evm.model.1.1138  | An03g01830        |
| evm.model.1.1139  | An03g01820        |
| evm.model.1.114   | An04g08830        |
| evm.model.1.1140  | An03g01810        |
| evm.model.1.1141  | An03g01790        |
| evm.model.1.1142  | An03g01750        |
| evm.model.1.1143  | An03g01710        |
| evm.model.1.1144  | An03g01700        |
| evm.model.1.1145  | An03g01690        |
| evm.model.1.1146  | An03g01660        |
| evm.model.1.1147  | An03g01650        |
| evm.model.1.1148  | An03g01640        |
| evm.model.1.1149  | An03g01620        |
| evm.model.1.115   | An04g08810        |
| evm.model.1.1150  | An03g01590        |
| evm.model.1.1151  | An03g01570        |
| evm.model.1.1152  | An03g01560        |
| evm.model.1.1153  | An03g01540        |
| evm.model.1.1154  | An03g01530        |
| evm.model.1.1155  | An03g01520        |
| evm.model.1.1156  | An14g01490        |
| evm.model.1.1157  | An03g01490        |
| evm.model.1.1158  | An03g01480        |
| evm.model.1.1159  | An03g01470        |
| evm.model.1.116   | An04g08800        |
| evm.model.1.1160  | An03g01460        |
| evm.model.1.1161  | An03g01450        |
| evm.model.1.1162  | An03g01430        |
| evm.model.1.1163  | An03g01420        |

---

---

| Gene ID of H915-1 | Gene ID of 513.88 |
|-------------------|-------------------|
| evm.model.1.1164  | An03g01390        |
| evm.model.1.1165  | An03g01370        |
| evm.model.1.1166  | An03g01360        |
| evm.model.1.1167  | An03g01320        |
| evm.model.1.1168  | An03g01310        |
| evm.model.1.1169  | An03g01300        |
| evm.model.1.117   | An04g08790        |
| evm.model.1.1170  | An03g01290        |
| evm.model.1.1171  | An03g01280        |
| evm.model.1.1172  | An03g01270        |
| evm.model.1.1173  | An03g01240        |
| evm.model.1.1174  | An03g01230        |
| evm.model.1.1175  | An03g01200        |
| evm.model.1.1176  | An03g01190        |
| evm.model.1.1177  | An03g01180        |
| evm.model.1.1178  | An03g01170        |
| evm.model.1.1179  | An03g01160        |
| evm.model.1.118   | An04g08760        |
| evm.model.1.1180  | An03g01140        |
| evm.model.1.1181  | An03g01130        |
| evm.model.1.1182  | An03g01120        |
| evm.model.1.1183  | An03g01110        |
| evm.model.1.1184  | An03g01090        |
| evm.model.1.1185  | An18g00060        |
| evm.model.1.1186  | An03g01060        |
| evm.model.1.1187  | An03g01050        |
| evm.model.1.1188  | An03g01030        |
| evm.model.1.1189  | An03g01010        |
| evm.model.1.119   | An04g08740        |
| evm.model.1.1190  | An03g01000        |
| evm.model.1.1191  | An03g00980        |
| evm.model.1.1192  | An03g00970        |
| evm.model.1.1193  | An03g00960        |
| evm.model.1.1194  | An03g00940        |
| evm.model.1.1195  | An03g00920        |
| evm.model.1.1196  | An03g00910        |
| evm.model.1.1197  | An03g00890        |
| evm.model.1.1198  | An03g00880        |
| evm.model.1.1199  | An03g00870        |
| evm.model.1.12    | An04g10090        |
| evm.model.1.120   | An04g08740        |
| evm.model.1.1200  | An03g00860        |
| evm.model.1.1201  | An03g00850        |

---

---

| Gene ID of H915-1 | Gene ID of 513.88 |
|-------------------|-------------------|
| evm.model.1.1203  | An03g00790        |
| evm.model.1.1204  | An03g00770        |
| evm.model.1.1205  | An03g00750        |
| evm.model.1.1206  | An03g00740        |
| evm.model.1.1207  | An03g00730        |
| evm.model.1.1208  | An03g00680        |
| evm.model.1.1209  | An03g00660        |
| evm.model.1.121   | An04g08730        |
| evm.model.1.1210  | An03g00650        |
| evm.model.1.1211  | An03g00640        |
| evm.model.1.1212  | An03g00600        |
| evm.model.1.1213  | An03g00590        |
| evm.model.1.1214  | An03g00580        |
| evm.model.1.1215  | An03g00560        |
| evm.model.1.1216  | An03g00500        |
| evm.model.1.1217  | An03g00490        |
| evm.model.1.1218  | An03g00480        |
| evm.model.1.1219  | An03g00470        |
| evm.model.1.122   | An04g08720        |
| evm.model.1.1220  | An03g00460        |
| evm.model.1.1221  | An03g00450        |
| evm.model.1.1222  | An03g00430        |
| evm.model.1.1223  | An03g00420        |
| evm.model.1.1224  | An03g00400        |
| evm.model.1.1225  | An03g00390        |
| evm.model.1.1226  | An03g00370        |
| evm.model.1.1227  | An03g00360        |
| evm.model.1.1228  | An03g00340        |
| evm.model.1.1229  | -                 |
| evm.model.1.123   | An04g08710        |
| evm.model.1.1230  | An03g00320        |
| evm.model.1.1231  | An03g00310        |
| evm.model.1.1232  | An03g00280        |
| evm.model.1.1234  | An03g00250        |
| evm.model.1.1235  | An03g00240        |
| evm.model.1.1236  | An03g00230        |
| evm.model.1.1238  | An03g00200        |
| evm.model.1.1239  | An03g00190        |
| evm.model.1.124   | An04g08700        |
| evm.model.1.1240  | An03g00180        |
| evm.model.1.1241  | An03g00170        |
| evm.model.1.1242  | An03g00160        |
| evm.model.1.1244  | An03g00140        |

---

---

| Gene ID of H915-1 | Gene ID of 513.88 |
|-------------------|-------------------|
| evm.model.1.1245  | An03g00130        |
| evm.model.1.1246  | An03g00060        |
| evm.model.1.1247  | An03g00040        |
| evm.model.1.1248  | An03g00030        |
| evm.model.1.125   | An04g08690        |
| evm.model.1.1250  | An03g00010        |
| evm.model.1.1251  | An03g06480        |
| evm.model.1.1252  | An14g04420        |
| evm.model.1.1253  | An18g04550        |
| evm.model.1.126   | An04g08680        |
| evm.model.1.127   | An04g08660        |
| evm.model.1.128   | An04g08650        |
| evm.model.1.129   | An04g08640        |
| evm.model.1.13    | An04g10080        |
| evm.model.1.130   | An04g08630        |
| evm.model.1.132   | An04g08620        |
| evm.model.1.133   | An04g08610        |
| evm.model.1.134   | An04g08600        |
| evm.model.1.135   | An04g08590        |
| evm.model.1.136   | An04g08580        |
| evm.model.1.137   | An04g08560        |
| evm.model.1.138   | An04g08550        |
| evm.model.1.139   | An04g08500        |
| evm.model.1.14    | An04g10070        |
| evm.model.1.140   | An04g08490        |
| evm.model.1.141   | An04g08440        |
| evm.model.1.142   | An04g08420        |
| evm.model.1.143   | An04g08390        |
| evm.model.1.144   | An04g08370        |
| evm.model.1.145   | An04g08360        |
| evm.model.1.146   | An04g08340        |
| evm.model.1.147   | An04g08330        |
| evm.model.1.148   | An04g08320        |
| evm.model.1.149   | An04g08300        |
| evm.model.1.15    | An04g10060        |
| evm.model.1.151   | An04g08240        |
| evm.model.1.153   | An04g08220        |
| evm.model.1.154   | An04g08210        |
| evm.model.1.155   | An04g08190        |
| evm.model.1.156   | An04g08160        |
| evm.model.1.157   | An04g08150        |
| evm.model.1.159   | An04g08130        |
| evm.model.1.16    | An04g10040        |

---



---

| Gene ID of H915-1 | Gene ID of 513.88 |
|-------------------|-------------------|
| evm.model.1.160   | An04g08120        |
| evm.model.1.161   | An04g08110        |
| evm.model.1.162   | An04g08100        |
| evm.model.1.163   | An04g08090        |
| evm.model.1.164   | An04g08080        |
| evm.model.1.165   | An04g08070        |
| evm.model.1.166   | An04g08050        |
| evm.model.1.167   | An04g08040        |
| evm.model.1.168   | An04g08030        |
| evm.model.1.169   | An04g08020        |
| evm.model.1.17    | An04g10030        |
| evm.model.1.171   | An08g09960        |
| evm.model.1.173   | An12g06860        |
| evm.model.1.174   | An08g12110        |
| evm.model.1.175   | An08g12110        |
| evm.model.1.176   | An03g03030        |
| evm.model.1.177   | An08g12200        |
| evm.model.1.178   | An13g03520        |
| evm.model.1.18    | An04g10020        |
| evm.model.1.180   | An03g06600        |
| evm.model.1.181   | An08g11160        |
| evm.model.1.183   | An02g13500        |
| evm.model.1.187   | An04g07800        |
| evm.model.1.189   | An04g07720        |
| evm.model.1.19    | An04g10010        |
| evm.model.1.190   | An12g05680        |
| evm.model.1.191   | An04g07800        |
| evm.model.1.192   | An04g07680        |
| evm.model.1.193   | An09g02020        |
| evm.model.1.198   | An08g12250        |
| evm.model.1.2     | An04g10290        |
| evm.model.1.20    | An04g10000        |
| evm.model.1.204   | An04g07540        |
| evm.model.1.205   | An04g07530        |
| evm.model.1.206   | An04g07510        |
| evm.model.1.207   | An04g07500        |
| evm.model.1.208   | An04g07490        |
| evm.model.1.209   | An04g07480        |
| evm.model.1.21    | An04g09990        |
| evm.model.1.210   | An04g07470        |
| evm.model.1.212   | An04g07460        |
| evm.model.1.213   | An04g07440        |
| evm.model.1.214   | -                 |

---

---

| Gene ID of H915-1 | Gene ID of 513.88 |
|-------------------|-------------------|
| evm.model.1.215   | An04g07430        |
| evm.model.1.216   | An04g07410        |
| evm.model.1.217   | An04g07400        |
| evm.model.1.218   | An04g07380        |
| evm.model.1.219   | An04g07370        |
| evm.model.1.22    | An01g12090        |
| evm.model.1.220   | An04g07340        |
| evm.model.1.221   | An04g07330        |
| evm.model.1.222   | An04g07320        |
| evm.model.1.224   | An04g07280        |
| evm.model.1.225   | An04g07270        |
| evm.model.1.226   | An04g07260        |
| evm.model.1.227   | An04g07250        |
| evm.model.1.228   | An04g07240        |
| evm.model.1.229   | An04g07230        |
| evm.model.1.23    | An01g12090        |
| evm.model.1.230   | An04g07220        |
| evm.model.1.231   | An04g07210        |
| evm.model.1.232   | An04g07200        |
| evm.model.1.233   | An04g07190        |
| evm.model.1.234   | An04g07180        |
| evm.model.1.235   | An04g07170        |
| evm.model.1.236   | An04g07160        |
| evm.model.1.237   | An04g07130        |
| evm.model.1.238   | An04g07120        |
| evm.model.1.239   | An04g07110        |
| evm.model.1.24    | An04g09960        |
| evm.model.1.240   | An04g07100        |
| evm.model.1.241   | An04g07090        |
| evm.model.1.242   | An04g07080        |
| evm.model.1.243   | An04g07070        |
| evm.model.1.244   | An04g07060        |
| evm.model.1.245   | An04g07050        |
| evm.model.1.246   | An04g07040        |
| evm.model.1.247   | An04g07030        |
| evm.model.1.248   | An04g07020        |
| evm.model.1.249   | An04g07010        |
| evm.model.1.25    | An04g09940        |
| evm.model.1.250   | An04g07000        |
| evm.model.1.251   | An04g06990        |
| evm.model.1.252   | An04g06980        |
| evm.model.1.253   | An04g06970        |
| evm.model.1.254   | An04g06960        |

---

---

| Gene ID of H915-1 | Gene ID of 513.88 |
|-------------------|-------------------|
| evm.model.1.255   | An04g06950        |
| evm.model.1.256   | An04g06940        |
| evm.model.1.257   | An04g06930        |
| evm.model.1.258   | An04g06920        |
| evm.model.1.259   | An04g06910        |
| evm.model.1.26    | An04g09920        |
| evm.model.1.260   | An04g06900        |
| evm.model.1.261   | An04g06890        |
| evm.model.1.262   | An04g06880        |
| evm.model.1.263   | An04g06870        |
| evm.model.1.264   | An04g06840        |
| evm.model.1.265   | An04g06730        |
| evm.model.1.266   | An04g06690        |
| evm.model.1.267   | An04g06680        |
| evm.model.1.268   | An04g06670        |
| evm.model.1.269   | An04g06660        |
| evm.model.1.27    | An04g09910        |
| evm.model.1.270   | An04g06650        |
| evm.model.1.271   | An04g06640        |
| evm.model.1.273   | An04g06620        |
| evm.model.1.274   | An04g06600        |
| evm.model.1.275   | An04g06590        |
| evm.model.1.276   | An04g06580        |
| evm.model.1.277   | An04g06570        |
| evm.model.1.278   | An04g06530        |
| evm.model.1.279   | An04g06510        |
| evm.model.1.28    | An04g09900        |
| evm.model.1.280   | An04g06500        |
| evm.model.1.281   | An04g06490        |
| evm.model.1.282   | An04g06430        |
| evm.model.1.283   | An04g06420        |
| evm.model.1.284   | An04g06400        |
| evm.model.1.285   | An04g06380        |
| evm.model.1.286   | An04g06370        |
| evm.model.1.287   | An04g06310        |
| evm.model.1.288   | An04g06300        |
| evm.model.1.289   | An04g06290        |
| evm.model.1.29    | An04g09890        |
| evm.model.1.290   | An04g06270        |
| evm.model.1.291   | An04g06260        |
| evm.model.1.292   | An04g06250        |
| evm.model.1.293   | An04g06210        |
| evm.model.1.294   | An04g06200        |

---

---

| Gene ID of H915-1 | Gene ID of 513.88 |
|-------------------|-------------------|
| evm.model.1.295   | An04g06180        |
| evm.model.1.296   | An04g06170        |
| evm.model.1.297   | An04g06160        |
| evm.model.1.298   | An04g06150        |
| evm.model.1.299   | An04g06140        |
| evm.model.1.3     | An04g10280        |
| evm.model.1.30    | An04g09870        |
| evm.model.1.300   | An04g06120        |
| evm.model.1.301   | An04g06100        |
| evm.model.1.302   | An04g06090        |
| evm.model.1.303   | An04g06080        |
| evm.model.1.304   | An04g06070        |
| evm.model.1.305   | An04g06060        |
| evm.model.1.306   | An04g06050        |
| evm.model.1.307   | An04g06040        |
| evm.model.1.308   | An04g06030        |
| evm.model.1.309   | An04g06020        |
| evm.model.1.31    | An04g09850        |
| evm.model.1.310   | An04g06010        |
| evm.model.1.311   | An04g06000        |
| evm.model.1.312   | An04g05990        |
| evm.model.1.313   | An04g05980        |
| evm.model.1.314   | An04g05970        |
| evm.model.1.315   | An04g05960        |
| evm.model.1.316   | An04g05950        |
| evm.model.1.317   | An04g05940        |
| evm.model.1.318   | An04g05930        |
| evm.model.1.319   | An04g05880        |
| evm.model.1.32    | An04g09830        |
| evm.model.1.320   | An04g05870        |
| evm.model.1.321   | An04g05860        |
| evm.model.1.322   | An04g05850        |
| evm.model.1.323   | An04g05820        |
| evm.model.1.324   | An04g05820        |
| evm.model.1.325   | An04g05810        |
| evm.model.1.326   | An04g05790        |
| evm.model.1.327   | -                 |
| evm.model.1.328   | An04g05760        |
| evm.model.1.329   | An04g05740        |
| evm.model.1.33    | An04g09820        |
| evm.model.1.330   | An04g05730        |
| evm.model.1.331   | An04g05720        |
| evm.model.1.332   | An04g05710        |

---

---

| Gene ID of H915-1 | Gene ID of 513.88 |
|-------------------|-------------------|
| evm.model.1.333   | An04g05700        |
| evm.model.1.334   | An04g05680        |
| evm.model.1.335   | An04g05670        |
| evm.model.1.336   | An04g05660        |
| evm.model.1.337   | An04g05650        |
| evm.model.1.338   | An04g05640        |
| evm.model.1.339   | An04g05630        |
| evm.model.1.34    | An04g09810        |
| evm.model.1.340   | An04g05620        |
| evm.model.1.341   | An04g05590        |
| evm.model.1.342   | An12g00800        |
| evm.model.1.343   | An04g05570        |
| evm.model.1.345   | An04g05550        |
| evm.model.1.346   | An04g05540        |
| evm.model.1.347   | An04g05530        |
| evm.model.1.348   | An04g05510        |
| evm.model.1.349   | An04g05500        |
| evm.model.1.35    | An04g09790        |
| evm.model.1.350   | An04g05490        |
| evm.model.1.351   | An04g05480        |
| evm.model.1.352   | An04g05460        |
| evm.model.1.353   | An04g05450        |
| evm.model.1.354   | An04g05440        |
| evm.model.1.355   | An04g05430        |
| evm.model.1.356   | An04g05420        |
| evm.model.1.357   | An04g05380        |
| evm.model.1.358   | An04g05360        |
| evm.model.1.359   | An04g05330        |
| evm.model.1.36    | An04g09770        |
| evm.model.1.360   | An04g05320        |
| evm.model.1.361   | An04g05310        |
| evm.model.1.362   | An04g05300        |
| evm.model.1.363   | An04g05280        |
| evm.model.1.364   | An04g05270        |
| evm.model.1.365   | An04g05260        |
| evm.model.1.366   | An04g05250        |
| evm.model.1.367   | An04g05230        |
| evm.model.1.368   | An04g05220        |
| evm.model.1.369   | An04g05210        |
| evm.model.1.37    | An04g09760        |
| evm.model.1.370   | An04g05190        |
| evm.model.1.371   | An04g05180        |
| evm.model.1.372   | An04g05150        |

---

---

| Gene ID of H915-1 | Gene ID of 513.88 |
|-------------------|-------------------|
| evm.model.1.373   | An04g05130        |
| evm.model.1.374   | An04g05120        |
| evm.model.1.375   | An04g05110        |
| evm.model.1.376   | An04g05100        |
| evm.model.1.377   | An04g05060        |
| evm.model.1.378   | An04g05000        |
| evm.model.1.379   | An04g04990        |
| evm.model.1.38    | An04g09750        |
| evm.model.1.380   | An04g04980        |
| evm.model.1.381   | An04g04970        |
| evm.model.1.382   | An04g04950        |
| evm.model.1.383   | An04g04940        |
| evm.model.1.384   | An04g04890        |
| evm.model.1.385   | An04g04880        |
| evm.model.1.386   | An04g04870        |
| evm.model.1.387   | An04g04860        |
| evm.model.1.389   | An04g04840        |
| evm.model.1.39    | An04g09740        |
| evm.model.1.391   | An04g04820        |
| evm.model.1.392   | An04g04810        |
| evm.model.1.393   | An04g04790        |
| evm.model.1.394   | An04g04770        |
| evm.model.1.395   | An04g04750        |
| evm.model.1.396   | An04g04740        |
| evm.model.1.397   | An04g04730        |
| evm.model.1.398   | An04g04720        |
| evm.model.1.399   | An04g04710        |
| evm.model.1.4     | An04g10270        |
| evm.model.1.40    | An04g09730        |
| evm.model.1.400   | An04g04700        |
| evm.model.1.401   | An04g04690        |
| evm.model.1.402   | An04g04680        |
| evm.model.1.403   | An04g04670        |
| evm.model.1.404   | An04g04640        |
| evm.model.1.405   | An04g04640        |
| evm.model.1.406   | An04g04630        |
| evm.model.1.407   | An04g04620        |
| evm.model.1.408   | An04g04590        |
| evm.model.1.409   | An04g04580        |
| evm.model.1.41    | An04g09720        |
| evm.model.1.410   | An04g04540        |
| evm.model.1.411   | An04g04510        |
| evm.model.1.412   | An04g04480        |

---

---

| Gene ID of H915-1 | Gene ID of 513.88 |
|-------------------|-------------------|
| evm.model.1.413   | An04g04470        |
| evm.model.1.414   | An04g04440        |
| evm.model.1.415   | An04g04430        |
| evm.model.1.416   | An04g04400        |
| evm.model.1.417   | An04g04380        |
| evm.model.1.418   | An04g04370        |
| evm.model.1.42    | -                 |
| evm.model.1.420   | An04g04340        |
| evm.model.1.421   | An04g04340        |
| evm.model.1.422   | An04g04330        |
| evm.model.1.423   | An04g04320        |
| evm.model.1.424   | An04g04280        |
| evm.model.1.425   | -                 |
| evm.model.1.426   | An04g04270        |
| evm.model.1.427   | An04g04240        |
| evm.model.1.428   | An04g04230        |
| evm.model.1.429   | An04g04210        |
| evm.model.1.43    | An04g09700        |
| evm.model.1.430   | An04g04170        |
| evm.model.1.431   | An07g00360        |
| evm.model.1.432   | An04g04150        |
| evm.model.1.433   | An04g04130        |
| evm.model.1.434   | An04g04110        |
| evm.model.1.435   | An04g04100        |
| evm.model.1.436   | An04g04080        |
| evm.model.1.437   | An04g04070        |
| evm.model.1.438   | An04g04060        |
| evm.model.1.439   | An04g04050        |
| evm.model.1.44    | An04g09690        |
| evm.model.1.440   | An04g04040        |
| evm.model.1.442   | An04g03980        |
| evm.model.1.443   | An04g03970        |
| evm.model.1.444   | An04g03960        |
| evm.model.1.445   | An04g03950        |
| evm.model.1.446   | An04g03940        |
| evm.model.1.447   | An04g03930        |
| evm.model.1.448   | An04g03920        |
| evm.model.1.449   | An04g03910        |
| evm.model.1.45    | An04g09680        |
| evm.model.1.450   | An04g03900        |
| evm.model.1.451   | An04g03890        |
| evm.model.1.452   | An04g03880        |
| evm.model.1.453   | An04g03870        |

---

---

| Gene ID of H915-1 | Gene ID of 513.88 |
|-------------------|-------------------|
| evm.model.1.454   | An04g03860        |
| evm.model.1.455   | An04g03850        |
| evm.model.1.456   | An04g03840        |
| evm.model.1.457   | An04g03830        |
| evm.model.1.458   | An04g03820        |
| evm.model.1.459   | An04g03810        |
| evm.model.1.46    | An04g09670        |
| evm.model.1.460   | An04g03800        |
| evm.model.1.461   | An04g03790        |
| evm.model.1.462   | An04g03780        |
| evm.model.1.463   | An04g03770        |
| evm.model.1.464   | An04g03750        |
| evm.model.1.466   | An04g03720        |
| evm.model.1.467   | An04g03710        |
| evm.model.1.468   | An04g03700        |
| evm.model.1.469   | An04g03690        |
| evm.model.1.47    | An04g09660        |
| evm.model.1.470   | An04g03680        |
| evm.model.1.471   | An04g03650        |
| evm.model.1.472   | An04g03640        |
| evm.model.1.473   | An04g03620        |
| evm.model.1.474   | An04g03610        |
| evm.model.1.475   | An04g03600        |
| evm.model.1.476   | An04g03590        |
| evm.model.1.477   | An04g03580        |
| evm.model.1.478   | An04g03570        |
| evm.model.1.479   | An04g03530        |
| evm.model.1.48    | An04g09650        |
| evm.model.1.480   | An04g03500        |
| evm.model.1.481   | An04g03495        |
| evm.model.1.482   | An04g03490        |
| evm.model.1.483   | An04g03460        |
| evm.model.1.484   | An04g03440        |
| evm.model.1.485   | An04g03420        |
| evm.model.1.486   | An04g03400        |
| evm.model.1.487   | An04g03380        |
| evm.model.1.488   | An04g03360        |
| evm.model.1.489   | An04g03350        |
| evm.model.1.49    | An04g09640        |
| evm.model.1.490   | An04g03340        |
| evm.model.1.491   | An04g03330        |
| evm.model.1.492   | An04g03320        |
| evm.model.1.493   | An04g03310        |

---



---

| Gene ID of H915-1 | Gene ID of 513.88 |
|-------------------|-------------------|
| evm.model.1.494   | An04g03300        |
| evm.model.1.495   | An04g03290        |
| evm.model.1.496   | An04g03270        |
| evm.model.1.497   | An04g03260        |
| evm.model.1.498   | An04g03250        |
| evm.model.1.499   | An04g03250        |
| evm.model.1.5     | An16g02400        |
| evm.model.1.50    | An04g09630        |
| evm.model.1.500   | An04g03220        |
| evm.model.1.501   | An04g03210        |
| evm.model.1.502   | An04g03200        |
| evm.model.1.503   | An04g03190        |
| evm.model.1.504   | An04g03190        |
| evm.model.1.505   | An04g03180        |
| evm.model.1.506   | An04g03170        |
| evm.model.1.507   | An04g03160        |
| evm.model.1.508   | An04g03140        |
| evm.model.1.509   | An04g03130        |
| evm.model.1.51    | An04g09620        |
| evm.model.1.510   | An04g03120        |
| evm.model.1.511   | An04g03110        |
| evm.model.1.512   | An04g03100        |
| evm.model.1.513   | An04g03090        |
| evm.model.1.514   | An04g03080        |
| evm.model.1.515   | An04g03070        |
| evm.model.1.516   | An04g03060        |
| evm.model.1.517   | An04g03050        |
| evm.model.1.519   | An04g03010        |
| evm.model.1.52    | An04g09610        |
| evm.model.1.520   | An12g05680        |
| evm.model.1.521   | An12g02770        |
| evm.model.1.522   | An04g02990        |
| evm.model.1.523   | An04g02980        |
| evm.model.1.524   | An04g02970        |
| evm.model.1.525   | An04g02950        |
| evm.model.1.526   | An04g02930        |
| evm.model.1.528   | An04g02910        |
| evm.model.1.529   | An04g02900        |
| evm.model.1.53    | An04g09600        |
| evm.model.1.530   | An04g02890        |
| evm.model.1.531   | An04g02880        |
| evm.model.1.532   | -                 |
| evm.model.1.533   | An04g02850        |

---

---

| Gene ID of H915-1 | Gene ID of 513.88 |
|-------------------|-------------------|
| evm.model.1.534   | An04g02840        |
| evm.model.1.535   | An04g02830        |
| evm.model.1.536   | An04g02810        |
| evm.model.1.537   | An04g02810        |
| evm.model.1.538   | An04g02800        |
| evm.model.1.539   | An04g02790        |
| evm.model.1.54    | -                 |
| evm.model.1.540   | An04g02780        |
| evm.model.1.541   | An04g02770        |
| evm.model.1.542   | An04g02760        |
| evm.model.1.543   | An08g06050        |
| evm.model.1.544   | An04g02730        |
| evm.model.1.545   | An04g02720        |
| evm.model.1.546   | An04g02710        |
| evm.model.1.547   | An04g02700        |
| evm.model.1.548   | An04g02690        |
| evm.model.1.549   | An04g02670        |
| evm.model.1.55    | An04g09580        |
| evm.model.1.550   | An04g02660        |
| evm.model.1.551   | An04g02650        |
| evm.model.1.552   | An04g02640        |
| evm.model.1.553   | An04g02620        |
| evm.model.1.554   | An04g02610        |
| evm.model.1.555   | An04g02600        |
| evm.model.1.556   | -                 |
| evm.model.1.557   | An04g02580        |
| evm.model.1.558   | An04g02570        |
| evm.model.1.559   | An04g02550        |
| evm.model.1.56    | An04g09570        |
| evm.model.1.560   | An04g02540        |
| evm.model.1.561   | An04g02530        |
| evm.model.1.562   | An04g02520        |
| evm.model.1.563   | An04g02510        |
| evm.model.1.564   | An04g02500        |
| evm.model.1.565   | An04g02490        |
| evm.model.1.566   | An04g02480        |
| evm.model.1.567   | An04g02460        |
| evm.model.1.568   | An04g02450        |
| evm.model.1.569   | An04g02420        |
| evm.model.1.570   | An04g02410        |
| evm.model.1.571   | An04g02400        |
| evm.model.1.572   | An04g02380        |
| evm.model.1.573   | An04g02370        |

---

---

| Gene ID of H915-1 | Gene ID of 513.88 |
|-------------------|-------------------|
| evm.model.1.574   | An04g02360        |
| evm.model.1.576   | An04g02340        |
| evm.model.1.577   | An04g02320        |
| evm.model.1.578   | An04g02320        |
| evm.model.1.579   | An04g02310        |
| evm.model.1.58    | An04g09560        |
| evm.model.1.580   | An04g02300        |
| evm.model.1.581   | An04g02280        |
| evm.model.1.582   | An04g02270        |
| evm.model.1.583   | An04g02240        |
| evm.model.1.584   | An04g02230        |
| evm.model.1.585   | An04g02220        |
| evm.model.1.586   | An04g02210        |
| evm.model.1.587   | An04g02200        |
| evm.model.1.588   | An04g02190        |
| evm.model.1.589   | An04g02170        |
| evm.model.1.59    | An04g09550        |
| evm.model.1.590   | An04g02160        |
| evm.model.1.591   | An04g02150        |
| evm.model.1.592   | An04g02130        |
| evm.model.1.593   | An04g02120        |
| evm.model.1.594   | An04g02110        |
| evm.model.1.595   | An04g02100        |
| evm.model.1.596   | An04g02090        |
| evm.model.1.597   | An04g02070        |
| evm.model.1.598   | An04g02060        |
| evm.model.1.599   | An04g02050        |
| evm.model.1.6     | An08g08410        |
| evm.model.1.60    | An04g09540        |
| evm.model.1.600   | An04g02040        |
| evm.model.1.601   | An04g02030        |
| evm.model.1.602   | An04g02020        |
| evm.model.1.603   | An04g02010        |
| evm.model.1.604   | An04g02000        |
| evm.model.1.605   | An04g01990        |
| evm.model.1.606   | An04g01980        |
| evm.model.1.607   | An04g01970        |
| evm.model.1.608   | An04g01960        |
| evm.model.1.609   | An04g01950        |
| evm.model.1.61    | An04g09530        |
| evm.model.1.610   | An04g01940        |
| evm.model.1.611   | An04g01930        |
| evm.model.1.612   | An04g01920        |

---

---

| Gene ID of H915-1 | Gene ID of 513.88 |
|-------------------|-------------------|
| evm.model.1.613   | An04g01910        |
| evm.model.1.614   | An04g01900        |
| evm.model.1.615   | An04g01890        |
| evm.model.1.616   | An04g01880        |
| evm.model.1.617   | An04g01870        |
| evm.model.1.618   | An04g01860        |
| evm.model.1.619   | An04g01850        |
| evm.model.1.62    | An04g09520        |
| evm.model.1.620   | An04g01840        |
| evm.model.1.621   | An04g01830        |
| evm.model.1.622   | -                 |
| evm.model.1.623   | An04g01810        |
| evm.model.1.624   | An04g01800        |
| evm.model.1.625   | An04g01790        |
| evm.model.1.626   | An04g01780        |
| evm.model.1.627   | An04g01770        |
| evm.model.1.628   | An04g01760        |
| evm.model.1.629   | An04g01750        |
| evm.model.1.63    | An04g09510        |
| evm.model.1.630   | An04g01740        |
| evm.model.1.631   | An04g01730        |
| evm.model.1.632   | An04g01720        |
| evm.model.1.633   | An04g01710        |
| evm.model.1.634   | An04g01700        |
| evm.model.1.635   | An04g01690        |
| evm.model.1.636   | An04g01680        |
| evm.model.1.637   | An04g01670        |
| evm.model.1.638   | An04g01660        |
| evm.model.1.639   | An04g01650        |
| evm.model.1.64    | An12g10140        |
| evm.model.1.640   | An04g01640        |
| evm.model.1.641   | An04g01630        |
| evm.model.1.642   | An04g01620        |
| evm.model.1.643   | An04g01610        |
| evm.model.1.644   | An04g01600        |
| evm.model.1.645   | An04g01590        |
| evm.model.1.646   | An04g01580        |
| evm.model.1.647   | An04g01570        |
| evm.model.1.648   | An04g01550        |
| evm.model.1.649   | An04g01540        |
| evm.model.1.65    | -                 |
| evm.model.1.650   | An04g01535        |
| evm.model.1.651   | An04g01530        |

---

---

| Gene ID of H915-1 | Gene ID of 513.88 |
|-------------------|-------------------|
| evm.model.1.652   | An04g01520        |
| evm.model.1.653   | An04g01500        |
| evm.model.1.654   | An04g01480        |
| evm.model.1.655   | An04g01470        |
| evm.model.1.656   | An04g01460        |
| evm.model.1.657   | An04g01450        |
| evm.model.1.658   | An04g01440        |
| evm.model.1.659   | An04g01430        |
| evm.model.1.66    | An04g09480        |
| evm.model.1.660   | An04g01420        |
| evm.model.1.661   | An04g01410        |
| evm.model.1.663   | An04g01390        |
| evm.model.1.664   | An04g01370        |
| evm.model.1.665   | An04g01360        |
| evm.model.1.666   | An04g01340        |
| evm.model.1.668   | An04g01330        |
| evm.model.1.669   | An04g01320        |
| evm.model.1.67    | An04g09440        |
| evm.model.1.670   | An04g01310        |
| evm.model.1.671   | An04g01300        |
| evm.model.1.672   | An04g01290        |
| evm.model.1.673   | An04g01280        |
| evm.model.1.674   | An04g01260        |
| evm.model.1.675   | An04g01250        |
| evm.model.1.676   | An04g01230        |
| evm.model.1.677   | An04g01210        |
| evm.model.1.678   | An04g01190        |
| evm.model.1.679   | An04g01170        |
| evm.model.1.68    | An16g04830        |
| evm.model.1.680   | An04g01160        |
| evm.model.1.681   | An04g01150        |
| evm.model.1.682   | An04g01140        |
| evm.model.1.683   | An04g01130        |
| evm.model.1.684   | An04g01120        |
| evm.model.1.685   | An04g01110        |
| evm.model.1.686   | An04g01100        |
| evm.model.1.687   | An04g01080        |
| evm.model.1.689   | An11g00670        |
| evm.model.1.69    | An04g09420        |
| evm.model.1.690   | An04g00960        |
| evm.model.1.691   | An04g00980        |
| evm.model.1.692   | An04g00990        |
| evm.model.1.694   | An04g00930        |

---

---

| Gene ID of H915-1 | Gene ID of 513.88 |
|-------------------|-------------------|
| evm.model.1.695   | An04g00910        |
| evm.model.1.696   | An04g00900        |
| evm.model.1.697   | An04g00880        |
| evm.model.1.698   | An04g00870        |
| evm.model.1.699   | An04g00860        |
| evm.model.1.70    | An04g09410        |
| evm.model.1.700   | An04g00850        |
| evm.model.1.701   | An04g00840        |
| evm.model.1.702   | An04g00830        |
| evm.model.1.703   | An04g00820        |
| evm.model.1.704   | An04g00800        |
| evm.model.1.705   | An04g00790        |
| evm.model.1.706   | An04g00780        |
| evm.model.1.707   | An04g00760        |
| evm.model.1.708   | An04g00750        |
| evm.model.1.709   | An04g00740        |
| evm.model.1.71    | An04g09400        |
| evm.model.1.711   | An04g00720        |
| evm.model.1.713   | An04g00690        |
| evm.model.1.714   | An04g00680        |
| evm.model.1.715   | An04g00670        |
| evm.model.1.716   | An04g00660        |
| evm.model.1.717   | An04g00640        |
| evm.model.1.718   | -                 |
| evm.model.1.719   | An04g00630        |
| evm.model.1.72    | An04g09390        |
| evm.model.1.720   | An04g00610        |
| evm.model.1.721   | An04g00600        |
| evm.model.1.722   | An04g00590        |
| evm.model.1.723   | An04g00580        |
| evm.model.1.724   | An04g00570        |
| evm.model.1.725   | An04g00560        |
| evm.model.1.726   | An04g00530        |
| evm.model.1.728   | An04g00510        |
| evm.model.1.729   | An04g00500        |
| evm.model.1.73    | An04g09380        |
| evm.model.1.730   | An04g00490        |
| evm.model.1.731   | An04g00480        |
| evm.model.1.732   | An04g00430        |
| evm.model.1.733   | An04g00420        |
| evm.model.1.734   | An04g00410        |
| evm.model.1.735   | An04g00390        |
| evm.model.1.736   | An04g00370        |

---

---

| Gene ID of H915-1 | Gene ID of 513.88 |
|-------------------|-------------------|
| evm.model.1.737   | An04g00360        |
| evm.model.1.738   | An04g00350        |
| evm.model.1.739   | An04g00340        |
| evm.model.1.74    | An04g09360        |
| evm.model.1.740   | An04g00300        |
| evm.model.1.741   | An04g00270        |
| evm.model.1.742   | An04g00250        |
| evm.model.1.743   | An18g03170        |
| evm.model.1.744   | An04g00220        |
| evm.model.1.745   | An04g00210        |
| evm.model.1.746   | An04g00200        |
| evm.model.1.747   | An04g00180        |
| evm.model.1.748   | An04g00170        |
| evm.model.1.749   | An04g00160        |
| evm.model.1.75    | An04g09290        |
| evm.model.1.750   | An04g00150        |
| evm.model.1.751   | An04g00140        |
| evm.model.1.752   | An04g00130        |
| evm.model.1.753   | An04g00120        |
| evm.model.1.754   | An04g00110        |
| evm.model.1.755   | An04g00100        |
| evm.model.1.756   | An04g00080        |
| evm.model.1.757   | An04g00070        |
| evm.model.1.758   | An04g00060        |
| evm.model.1.759   | An04g00050        |
| evm.model.1.76    | An04g09270        |
| evm.model.1.760   | An04g00020        |
| evm.model.1.761   | An04g00010        |
| evm.model.1.763   | An03g06970        |
| evm.model.1.764   | An03g06960        |
| evm.model.1.765   | An03g06950        |
| evm.model.1.766   | An03g06940        |
| evm.model.1.767   | An03g06930        |
| evm.model.1.768   | An03g06920        |
| evm.model.1.769   | An03g06910        |
| evm.model.1.77    | An04g09260        |
| evm.model.1.770   | An03g06900        |
| evm.model.1.772   | An03g06880        |
| evm.model.1.773   | An03g06870        |
| evm.model.1.774   | An03g06860        |
| evm.model.1.775   | An03g06850        |
| evm.model.1.776   | An03g06840        |
| evm.model.1.777   | An03g06830        |

---

---

| Gene ID of H915-1 | Gene ID of 513.88 |
|-------------------|-------------------|
| evm.model.1.778   | An03g06820        |
| evm.model.1.779   | An03g06810        |
| evm.model.1.78    | An04g09250        |
| evm.model.1.780   | An03g06800        |
| evm.model.1.781   | An03g06790        |
| evm.model.1.782   | -                 |
| evm.model.1.784   | An03g06760        |
| evm.model.1.785   | An03g06750        |
| evm.model.1.786   | An03g06730        |
| evm.model.1.787   | An03g06720        |
| evm.model.1.788   | An03g06710        |
| evm.model.1.789   | -                 |
| evm.model.1.79    | An04g09230        |
| evm.model.1.790   | An03g06700        |
| evm.model.1.791   | An03g06690        |
| evm.model.1.792   | An03g06670        |
| evm.model.1.793   | An03g06660        |
| evm.model.1.794   | An03g06650        |
| evm.model.1.795   | An03g06630        |
| evm.model.1.796   | An03g06620        |
| evm.model.1.798   | An03g06600        |
| evm.model.1.799   | An03g06590        |
| evm.model.1.8     | An02g12900        |
| evm.model.1.80    | An04g09220        |
| evm.model.1.800   | An03g06580        |
| evm.model.1.801   | An03g06580        |
| evm.model.1.802   | An03g06570        |
| evm.model.1.803   | An03g06560        |
| evm.model.1.804   | An03g06550        |
| evm.model.1.805   | An03g06540        |
| evm.model.1.806   | An03g06530        |
| evm.model.1.807   | An03g06510        |
| evm.model.1.808   | An03g06500        |
| evm.model.1.809   | An03g06490        |
| evm.model.1.81    | An08g09960        |
| evm.model.1.810   | An03g06480        |
| evm.model.1.811   | An03g06470        |
| evm.model.1.812   | An03g06460        |
| evm.model.1.813   | An03g06450        |
| evm.model.1.814   | An03g06440        |
| evm.model.1.815   | An03g06430        |
| evm.model.1.816   | An03g06420        |
| evm.model.1.817   | An03g06410        |

---



---

| Gene ID of H915-1 | Gene ID of 513.88 |
|-------------------|-------------------|
| evm.model.1.818   | An03g06400        |
| evm.model.1.819   | An03g06390        |
| evm.model.1.82    | An04g09190        |
| evm.model.1.820   | An03g06380        |
| evm.model.1.821   | An03g06370        |
| evm.model.1.822   | An03g06360        |
| evm.model.1.823   | An03g06350        |
| evm.model.1.824   | An03g06340        |
| evm.model.1.825   | An03g06330        |
| evm.model.1.826   | An03g06320        |
| evm.model.1.827   | An03g06310        |
| evm.model.1.828   | An03g06300        |
| evm.model.1.829   | An03g06270        |
| evm.model.1.83    | An04g09170        |
| evm.model.1.830   | An03g06250        |
| evm.model.1.831   | An03g06250        |
| evm.model.1.832   | An03g06240        |
| evm.model.1.833   | An03g06230        |
| evm.model.1.834   | An13g01780        |
| evm.model.1.835   | An03g06220        |
| evm.model.1.836   | An03g06140        |
| evm.model.1.837   | An03g06120        |
| evm.model.1.838   | An03g06090        |
| evm.model.1.839   | An03g06080        |
| evm.model.1.84    | An04g09160        |
| evm.model.1.840   | An03g06020        |
| evm.model.1.841   | An03g06010        |
| evm.model.1.842   | An03g06000        |
| evm.model.1.843   | An03g05990        |
| evm.model.1.844   | An03g05980        |
| evm.model.1.845   | An03g05960        |
| evm.model.1.846   | An03g05940        |
| evm.model.1.847   | An03g05930        |
| evm.model.1.848   | An07g05640        |
| evm.model.1.849   | An03g05890        |
| evm.model.1.85    | An04g09150        |
| evm.model.1.850   | An03g05890        |
| evm.model.1.851   | An03g05880        |
| evm.model.1.852   | -                 |
| evm.model.1.853   | An03g05870        |
| evm.model.1.854   | An03g05860        |
| evm.model.1.855   | An03g05850        |
| evm.model.1.856   | An03g05840        |

---

---

| Gene ID of H915-1 | Gene ID of 513.88 |
|-------------------|-------------------|
| evm.model.1.857   | An03g05830        |
| evm.model.1.858   | An03g05810        |
| evm.model.1.859   | An03g05790        |
| evm.model.1.860   | An03g05780        |
| evm.model.1.861   | An03g05770        |
| evm.model.1.862   | An03g05750        |
| evm.model.1.863   | An03g05740        |
| evm.model.1.865   | An03g05680        |
| evm.model.1.866   | An03g05670        |
| evm.model.1.867   | An03g05660        |
| evm.model.1.868   | An03g05650        |
| evm.model.1.869   | An08g11230        |
| evm.model.1.87    | An04g09130        |
| evm.model.1.871   | An03g05620        |
| evm.model.1.872   | An03g05610        |
| evm.model.1.873   | An03g05600        |
| evm.model.1.874   | An03g05590        |
| evm.model.1.875   | An03g05590        |
| evm.model.1.876   | An03g05560        |
| evm.model.1.877   | An03g05540        |
| evm.model.1.878   | An03g05530        |
| evm.model.1.879   | An08g10880        |
| evm.model.1.88    | An04g09120        |
| evm.model.1.881   | An03g05490        |
| evm.model.1.882   | An03g05480        |
| evm.model.1.884   | An03g05460        |
| evm.model.1.885   | An03g05450        |
| evm.model.1.886   | -                 |
| evm.model.1.887   | An03g05440        |
| evm.model.1.888   | An03g05430        |
| evm.model.1.889   | An03g05420        |
| evm.model.1.89    | -                 |
| evm.model.1.890   | An04g03890        |
| evm.model.1.891   | An03g05380        |
| evm.model.1.892   | An03g05360        |
| evm.model.1.893   | An03g05340        |
| evm.model.1.894   | An03g05330        |
| evm.model.1.895   | An03g05320        |
| evm.model.1.896   | An03g05310        |
| evm.model.1.897   | An03g05300        |
| evm.model.1.898   | An03g05290        |
| evm.model.1.899   | An03g05260        |
| evm.model.1.9     | An04g10130        |

---

---

| Gene ID of H915-1 | Gene ID of 513.88 |
|-------------------|-------------------|
| evm.model.1.90    | An04g09100        |
| evm.model.1.900   | An03g05250        |
| evm.model.1.901   | An03g05240        |
| evm.model.1.902   | An03g05220        |
| evm.model.1.903   | An03g05210        |
| evm.model.1.904   | An03g05200        |
| evm.model.1.905   | An03g05190        |
| evm.model.1.906   | An03g05170        |
| evm.model.1.907   | An03g05160        |
| evm.model.1.908   | An03g05150        |
| evm.model.1.909   | An03g05140        |
| evm.model.1.91    | An04g09090        |
| evm.model.1.910   | An03g05130        |
| evm.model.1.911   | An03g05120        |
| evm.model.1.912   | An03g05110        |
| evm.model.1.913   | An03g05100        |
| evm.model.1.914   | An03g05090        |
| evm.model.1.915   | An03g05080        |
| evm.model.1.916   | An03g05070        |
| evm.model.1.917   | An03g05060        |
| evm.model.1.918   | An03g05050        |
| evm.model.1.919   | An03g05030        |
| evm.model.1.92    | An04g09080        |
| evm.model.1.920   | An03g05020        |
| evm.model.1.921   | An03g05010        |
| evm.model.1.922   | An03g05000        |
| evm.model.1.923   | An03g04990        |
| evm.model.1.924   | An03g04970        |
| evm.model.1.925   | -                 |
| evm.model.1.926   | An03g04960        |
| evm.model.1.927   | An03g04940        |
| evm.model.1.928   | An03g04930        |
| evm.model.1.929   | An03g04890        |
| evm.model.1.93    | An04g09070        |
| evm.model.1.930   | An03g04880        |
| evm.model.1.931   | An03g04880        |
| evm.model.1.932   | An03g04870        |
| evm.model.1.933   | An03g04860        |
| evm.model.1.934   | An03g04850        |
| evm.model.1.935   | An03g04840        |
| evm.model.1.936   | An03g04820        |
| evm.model.1.937   | An03g04810        |
| evm.model.1.938   | An03g04800        |

---

---

| Gene ID of H915-1 | Gene ID of 513.88 |
|-------------------|-------------------|
| evm.model.1.939   | An03g04790        |
| evm.model.1.94    | -                 |
| evm.model.1.940   | An03g04770        |
| evm.model.1.941   | An03g04760        |
| evm.model.1.942   | An03g04750        |
| evm.model.1.943   | An03g04740        |
| evm.model.1.944   | An03g04730        |
| evm.model.1.945   | An03g04720        |
| evm.model.1.946   | An03g04710        |
| evm.model.1.947   | An03g04700        |
| evm.model.1.948   | An03g04690        |
| evm.model.1.949   | An03g04680        |
| evm.model.1.95    | -                 |
| evm.model.1.950   | An03g04670        |
| evm.model.1.951   | An03g04660        |
| evm.model.1.952   | An03g04650        |
| evm.model.1.953   | An03g04610        |
| evm.model.1.954   | An03g04600        |
| evm.model.1.955   | An03g04590        |
| evm.model.1.956   | An03g04570        |
| evm.model.1.957   | An03g04570        |
| evm.model.1.958   | An03g04560        |
| evm.model.1.959   | An03g04550        |
| evm.model.1.96    | An04g09065        |
| evm.model.1.960   | An03g04530        |
| evm.model.1.961   | An03g04520        |
| evm.model.1.962   | An03g04510        |
| evm.model.1.963   | An03g04500        |
| evm.model.1.964   | An03g04430        |
| evm.model.1.965   | An03g04410        |
| evm.model.1.966   | An03g04400        |
| evm.model.1.967   | An03g04390        |
| evm.model.1.968   | -                 |
| evm.model.1.969   | An03g04380        |
| evm.model.1.97    | An04g09062        |
| evm.model.1.970   | An03g04360        |
| evm.model.1.971   | An03g04350        |
| evm.model.1.972   | An03g04340        |
| evm.model.1.973   | An03g04330        |
| evm.model.1.974   | An03g04320        |
| evm.model.1.975   | An03g04310        |
| evm.model.1.976   | An03g04280        |
| evm.model.1.977   | An03g04250        |

---

---

| Gene ID of H915-1       | Gene ID of 513.88 |
|-------------------------|-------------------|
| evm.model.1.978         | An03g04250        |
| evm.model.1.979         | An03g04230        |
| evm.model.1.98          | An04g09060        |
| evm.model.1.980         | An03g04210        |
| evm.model.1.981         | An03g04190        |
| evm.model.1.982         | An03g04180        |
| evm.model.1.983         | An03g04140        |
| evm.model.1.984         | An03g04130        |
| evm.model.1.985         | An03g04120        |
| evm.model.1.986         | An03g04110        |
| evm.model.1.987         | An03g04090        |
| evm.model.1.988         | An03g04080        |
| evm.model.1.989         | An03g04060        |
| evm.model.1.99          | An04g09050        |
| evm.model.1.990         | An03g03960        |
| evm.model.1.991         | An03g03940        |
| evm.model.1.992         | An03g03930        |
| evm.model.1.993         | An03g03900        |
| evm.model.1.994         | An03g03890        |
| evm.model.1.995         | An03g03870        |
| evm.model.1.996         | An03g03860        |
| evm.model.1.997         | An03g03850        |
| evm.model.1.998         | An03g03840        |
| evm.model.1.999         | An03g03830        |
| evm.model.unitig_0.1    | -                 |
| evm.model.unitig_0.10   | An07g00060        |
| evm.model.unitig_0.100  | An07g01410        |
| evm.model.unitig_0.1000 | An02g11330        |
| evm.model.unitig_0.1001 | An02g11320        |
| evm.model.unitig_0.1002 | An02g11300        |
| evm.model.unitig_0.1003 | An02g11290        |
| evm.model.unitig_0.1004 | An02g11280        |
| evm.model.unitig_0.1005 | An02g11270        |
| evm.model.unitig_0.1006 | An02g11260        |
| evm.model.unitig_0.1007 | An02g11230        |
| evm.model.unitig_0.1008 | An02g11210        |
| evm.model.unitig_0.1009 | An02g11200        |
| evm.model.unitig_0.101  | An07g01420        |
| evm.model.unitig_0.1010 | An02g11190        |
| evm.model.unitig_0.1011 | An02g11180        |
| evm.model.unitig_0.1012 | An02g11180        |
| evm.model.unitig_0.1013 | An02g11170        |
| evm.model.unitig_0.1014 | An02g11160        |

---

---

| Gene ID of H915-1       | Gene ID of 513.88 |
|-------------------------|-------------------|
| evm.model.unitig_0.1015 | An02g11150        |
| evm.model.unitig_0.1016 | An02g11140        |
| evm.model.unitig_0.1017 | An02g11120        |
| evm.model.unitig_0.1018 | An02g11090        |
| evm.model.unitig_0.1019 | An02g11080        |
| evm.model.unitig_0.102  | An07g01430        |
| evm.model.unitig_0.1020 | An02g11070        |
| evm.model.unitig_0.1021 | An02g11060        |
| evm.model.unitig_0.1022 | An02g11040        |
| evm.model.unitig_0.1023 | An02g11030        |
| evm.model.unitig_0.1024 | An02g11000        |
| evm.model.unitig_0.1025 | An02g10690        |
| evm.model.unitig_0.1026 | An02g10980        |
| evm.model.unitig_0.1027 | An02g10970        |
| evm.model.unitig_0.1028 | An02g10940        |
| evm.model.unitig_0.1029 | An02g10930        |
| evm.model.unitig_0.103  | An07g01440        |
| evm.model.unitig_0.1030 | An02g10920        |
| evm.model.unitig_0.1031 | An02g10900        |
| evm.model.unitig_0.1032 | An02g10890        |
| evm.model.unitig_0.1033 | An02g10870        |
| evm.model.unitig_0.1034 | An07g02880        |
| evm.model.unitig_0.1035 | An02g10840        |
| evm.model.unitig_0.1036 | An02g10830        |
| evm.model.unitig_0.1037 | An02g10810        |
| evm.model.unitig_0.1038 | An02g10790        |
| evm.model.unitig_0.1039 | An02g10780        |
| evm.model.unitig_0.104  | An07g01450        |
| evm.model.unitig_0.1040 | An02g10760        |
| evm.model.unitig_0.1041 | An02g10750        |
| evm.model.unitig_0.1042 | An02g10740        |
| evm.model.unitig_0.1043 | An02g10730        |
| evm.model.unitig_0.1044 | An02g10710        |
| evm.model.unitig_0.1045 | An02g10700        |
| evm.model.unitig_0.1046 | An02g10690        |
| evm.model.unitig_0.1047 | An02g10680        |
| evm.model.unitig_0.1048 | An02g10670        |
| evm.model.unitig_0.1049 | An02g10660        |
| evm.model.unitig_0.105  | An07g01470        |
| evm.model.unitig_0.1050 | An02g10620        |
| evm.model.unitig_0.1051 | An02g10610        |
| evm.model.unitig_0.1052 | An02g10610        |
| evm.model.unitig_0.1053 | An02g10580        |

---

---

| Gene ID of H915-1       | Gene ID of 513.88 |
|-------------------------|-------------------|
| evm.model.unitig_0.1054 | An02g10550        |
| evm.model.unitig_0.1055 | An02g10490        |
| evm.model.unitig_0.1056 | An02g10480        |
| evm.model.unitig_0.1057 | An02g10470        |
| evm.model.unitig_0.1058 | An02g10460        |
| evm.model.unitig_0.1059 | An02g10450        |
| evm.model.unitig_0.106  | An07g01480        |
| evm.model.unitig_0.1060 | An02g10440        |
| evm.model.unitig_0.1061 | An02g10400        |
| evm.model.unitig_0.1062 | An02g10390        |
| evm.model.unitig_0.1063 | An02g10370        |
| evm.model.unitig_0.1064 | An02g10360        |
| evm.model.unitig_0.1065 | An02g10350        |
| evm.model.unitig_0.1066 | An02g10340        |
| evm.model.unitig_0.1067 | An02g10330        |
| evm.model.unitig_0.1068 | An02g10320        |
| evm.model.unitig_0.1069 | An02g10310        |
| evm.model.unitig_0.107  | An07g01510        |
| evm.model.unitig_0.1070 | An02g10270        |
| evm.model.unitig_0.1071 | An02g10260        |
| evm.model.unitig_0.1072 | An02g10230        |
| evm.model.unitig_0.1073 | An02g10220        |
| evm.model.unitig_0.1074 | An02g10210        |
| evm.model.unitig_0.1075 | An02g10200        |
| evm.model.unitig_0.1076 | An02g10190        |
| evm.model.unitig_0.1077 | An02g10180        |
| evm.model.unitig_0.1078 | An02g10170        |
| evm.model.unitig_0.1079 | An02g10160        |
| evm.model.unitig_0.108  | An07g01520        |
| evm.model.unitig_0.1080 | An02g10150        |
| evm.model.unitig_0.1081 | An02g10140        |
| evm.model.unitig_0.1082 | An02g10120        |
| evm.model.unitig_0.1084 | An02g10110        |
| evm.model.unitig_0.1085 | An02g10100        |
| evm.model.unitig_0.1086 | An02g10090        |
| evm.model.unitig_0.1087 | An02g10080        |
| evm.model.unitig_0.1088 | An02g10050        |
| evm.model.unitig_0.1089 | An02g10040        |
| evm.model.unitig_0.109  | An07g01530        |
| evm.model.unitig_0.1090 | An02g10030        |
| evm.model.unitig_0.1092 | An18g03810        |
| evm.model.unitig_0.1093 | An02g10000        |
| evm.model.unitig_0.1094 | An02g09990        |

---

---

| Gene ID of H915-1       | Gene ID of 513.88 |
|-------------------------|-------------------|
| evm.model.unitig_0.1095 | An02g09970        |
| evm.model.unitig_0.1096 | An02g09960        |
| evm.model.unitig_0.1097 | An02g09950        |
| evm.model.unitig_0.1098 | An02g09940        |
| evm.model.unitig_0.1099 | An02g09930        |
| evm.model.unitig_0.11   | An07g00080        |
| evm.model.unitig_0.110  | An07g01540        |
| evm.model.unitig_0.1100 | An02g09910        |
| evm.model.unitig_0.1101 | An02g09890        |
| evm.model.unitig_0.1102 | An02g09830        |
| evm.model.unitig_0.1103 | An02g09810        |
| evm.model.unitig_0.1104 | An02g09790        |
| evm.model.unitig_0.1105 | An02g09780        |
| evm.model.unitig_0.1106 | An02g09740        |
| evm.model.unitig_0.1107 | An02g09730        |
| evm.model.unitig_0.1108 | An02g09720        |
| evm.model.unitig_0.1109 | An02g09710        |
| evm.model.unitig_0.111  | An07g01550        |
| evm.model.unitig_0.1110 | An02g09690        |
| evm.model.unitig_0.1111 | An02g09610        |
| evm.model.unitig_0.1112 | An02g09560        |
| evm.model.unitig_0.1113 | An02g09550        |
| evm.model.unitig_0.1114 | An02g09540        |
| evm.model.unitig_0.1115 | An02g09470        |
| evm.model.unitig_0.1116 | An02g09460        |
| evm.model.unitig_0.1117 | An02g09440        |
| evm.model.unitig_0.1118 | An02g09430        |
| evm.model.unitig_0.1119 | An02g09420        |
| evm.model.unitig_0.112  | An07g01560        |
| evm.model.unitig_0.1120 | An02g09390        |
| evm.model.unitig_0.1121 | An02g09370        |
| evm.model.unitig_0.1122 | An02g09350        |
| evm.model.unitig_0.1123 | An02g09340        |
| evm.model.unitig_0.1124 | An02g09330        |
| evm.model.unitig_0.1125 | An02g09310        |
| evm.model.unitig_0.1126 | An02g09300        |
| evm.model.unitig_0.1127 | An02g09290        |
| evm.model.unitig_0.1128 | An02g09280        |
| evm.model.unitig_0.1129 | -                 |
| evm.model.unitig_0.113  | An07g01580        |
| evm.model.unitig_0.1130 | An02g09270        |
| evm.model.unitig_0.1131 | An02g09260        |
| evm.model.unitig_0.1132 | An02g09250        |

---



---

| Gene ID of H915-1       | Gene ID of 513.88 |
|-------------------------|-------------------|
| evm.model.unitig_0.1133 | An02g09240        |
| evm.model.unitig_0.1134 | An02g09220        |
| evm.model.unitig_0.1135 | An02g09210        |
| evm.model.unitig_0.1136 | An02g09200        |
| evm.model.unitig_0.1137 | An02g09190        |
| evm.model.unitig_0.1138 | An02g09180        |
| evm.model.unitig_0.1139 | An02g09170        |
| evm.model.unitig_0.114  | An07g01620        |
| evm.model.unitig_0.1140 | An02g09160        |
| evm.model.unitig_0.1141 | An02g09150        |
| evm.model.unitig_0.1142 | An02g09100        |
| evm.model.unitig_0.1143 | An02g09090        |
| evm.model.unitig_0.1144 | An02g09080        |
| evm.model.unitig_0.1145 | An02g09070        |
| evm.model.unitig_0.1146 | An02g09060        |
| evm.model.unitig_0.1147 | An02g09050        |
| evm.model.unitig_0.1148 | An02g09040        |
| evm.model.unitig_0.1149 | An02g09030        |
| evm.model.unitig_0.115  | An07g01640        |
| evm.model.unitig_0.1150 | An02g09020        |
| evm.model.unitig_0.1151 | An02g09010        |
| evm.model.unitig_0.1152 | An02g09000        |
| evm.model.unitig_0.1153 | An02g08990        |
| evm.model.unitig_0.1154 | An02g08980        |
| evm.model.unitig_0.1155 | An02g08970        |
| evm.model.unitig_0.1156 | An02g08950        |
| evm.model.unitig_0.1157 | An02g08940        |
| evm.model.unitig_0.1158 | An02g08930        |
| evm.model.unitig_0.1159 | An02g08920        |
| evm.model.unitig_0.116  | An07g01650        |
| evm.model.unitig_0.1160 | -                 |
| evm.model.unitig_0.1161 | An02g08910        |
| evm.model.unitig_0.1162 | An02g08900        |
| evm.model.unitig_0.1163 | An02g08890        |
| evm.model.unitig_0.1164 | -                 |
| evm.model.unitig_0.1165 | An02g08870        |
| evm.model.unitig_0.1166 | An02g08860        |
| evm.model.unitig_0.1167 | An02g08850        |
| evm.model.unitig_0.1168 | An02g08845        |
| evm.model.unitig_0.1169 | An02g08840        |
| evm.model.unitig_0.117  | An07g01670        |
| evm.model.unitig_0.1170 | An02g08830        |
| evm.model.unitig_0.1171 | An02g08820        |

---

---

| Gene ID of H915-1       | Gene ID of 513.88 |
|-------------------------|-------------------|
| evm.model.unitig_0.1172 | An02g08800        |
| evm.model.unitig_0.1173 | An02g08790        |
| evm.model.unitig_0.1174 | An02g08780        |
| evm.model.unitig_0.1175 | An02g08770        |
| evm.model.unitig_0.1176 | An02g08760        |
| evm.model.unitig_0.1177 | An02g08750        |
| evm.model.unitig_0.1178 | An02g08740        |
| evm.model.unitig_0.1179 | An02g08730        |
| evm.model.unitig_0.118  | An07g01680        |
| evm.model.unitig_0.1180 | An02g08720        |
| evm.model.unitig_0.1181 | An02g08700        |
| evm.model.unitig_0.1182 | An02g08690        |
| evm.model.unitig_0.1183 | An02g08680        |
| evm.model.unitig_0.1184 | An02g08670        |
| evm.model.unitig_0.1185 | An02g08660        |
| evm.model.unitig_0.1186 | An02g08640        |
| evm.model.unitig_0.1187 | An02g08630        |
| evm.model.unitig_0.1188 | An02g08620        |
| evm.model.unitig_0.1189 | An02g08610        |
| evm.model.unitig_0.119  | An07g01690        |
| evm.model.unitig_0.1190 | An02g08600        |
| evm.model.unitig_0.1191 | An02g08590        |
| evm.model.unitig_0.1193 | An02g08570        |
| evm.model.unitig_0.1194 | An02g08560        |
| evm.model.unitig_0.1195 | An04g04570        |
| evm.model.unitig_0.1196 | An02g08530        |
| evm.model.unitig_0.1197 | An02g08520        |
| evm.model.unitig_0.1198 | An02g08510        |
| evm.model.unitig_0.1199 | An02g08490        |
| evm.model.unitig_0.12   | An07g00090        |
| evm.model.unitig_0.120  | An07g01700        |
| evm.model.unitig_0.1200 | An02g08470        |
| evm.model.unitig_0.1202 | An02g08460        |
| evm.model.unitig_0.1203 | An02g08450        |
| evm.model.unitig_0.1204 | An02g08440        |
| evm.model.unitig_0.1205 | An02g08430        |
| evm.model.unitig_0.1206 | An02g08420        |
| evm.model.unitig_0.1207 | An02g08410        |
| evm.model.unitig_0.1208 | An02g08400        |
| evm.model.unitig_0.1209 | An02g08390        |
| evm.model.unitig_0.121  | An07g01710        |
| evm.model.unitig_0.1210 | An02g08380        |
| evm.model.unitig_0.1211 | An02g08370        |

---

---

| Gene ID of H915-1       | Gene ID of 513.88 |
|-------------------------|-------------------|
| evm.model.unitig_0.1212 | An02g08350        |
| evm.model.unitig_0.1213 | An02g08340        |
| evm.model.unitig_0.1214 | An02g08330        |
| evm.model.unitig_0.1215 | An02g08320        |
| evm.model.unitig_0.1216 | An02g08310        |
| evm.model.unitig_0.1217 | An02g08290        |
| evm.model.unitig_0.1218 | An02g08000        |
| evm.model.unitig_0.1219 | An02g08010        |
| evm.model.unitig_0.122  | An03g06510        |
| evm.model.unitig_0.1220 | An02g08020        |
| evm.model.unitig_0.1222 | An02g08040        |
| evm.model.unitig_0.1223 | An02g08050        |
| evm.model.unitig_0.1224 | An02g08060        |
| evm.model.unitig_0.1225 | An02g08070        |
| evm.model.unitig_0.1226 | An02g08080        |
| evm.model.unitig_0.1227 | An02g08090        |
| evm.model.unitig_0.1228 | An02g08100        |
| evm.model.unitig_0.1229 | An02g08110        |
| evm.model.unitig_0.123  | An07g01730        |
| evm.model.unitig_0.1230 | An02g08120        |
| evm.model.unitig_0.1231 | An02g08130        |
| evm.model.unitig_0.1232 | An02g08140        |
| evm.model.unitig_0.1233 | An02g08160        |
| evm.model.unitig_0.1234 | An02g08170        |
| evm.model.unitig_0.1235 | An02g08180        |
| evm.model.unitig_0.1236 | An02g08200        |
| evm.model.unitig_0.1237 | An02g08210        |
| evm.model.unitig_0.1238 | An02g08220        |
| evm.model.unitig_0.1239 | An02g08250        |
| evm.model.unitig_0.124  | An07g01780        |
| evm.model.unitig_0.1240 | An02g08260        |
| evm.model.unitig_0.1241 | An02g08270        |
| evm.model.unitig_0.1242 | An02g07980        |
| evm.model.unitig_0.1243 | An02g07960        |
| evm.model.unitig_0.1244 | An02g07950        |
| evm.model.unitig_0.1245 | An02g07940        |
| evm.model.unitig_0.1246 | An02g07930        |
| evm.model.unitig_0.1248 | An02g07910        |
| evm.model.unitig_0.1249 | An02g07900        |
| evm.model.unitig_0.1250 | An02g07890        |
| evm.model.unitig_0.1251 | An02g07880        |
| evm.model.unitig_0.1252 | An02g07870        |
| evm.model.unitig_0.1253 | An02g07860        |

---

---

| Gene ID of H915-1       | Gene ID of 513.88 |
|-------------------------|-------------------|
| evm.model.unitig_0.1254 | An02g07850        |
| evm.model.unitig_0.1255 | An02g07840        |
| evm.model.unitig_0.1256 | An02g07830        |
| evm.model.unitig_0.1257 | -                 |
| evm.model.unitig_0.1258 | An02g07820        |
| evm.model.unitig_0.1259 | An02g07800        |
| evm.model.unitig_0.1260 | An02g07780        |
| evm.model.unitig_0.1261 | An02g07770        |
| evm.model.unitig_0.1262 | -                 |
| evm.model.unitig_0.1263 | An02g07760        |
| evm.model.unitig_0.1264 | An02g07750        |
| evm.model.unitig_0.1265 | An02g07740        |
| evm.model.unitig_0.1266 | An02g07730        |
| evm.model.unitig_0.1267 | -                 |
| evm.model.unitig_0.1268 | An02g07720        |
| evm.model.unitig_0.1269 | An02g07710        |
| evm.model.unitig_0.127  | An18g06220        |
| evm.model.unitig_0.1270 | An02g07700        |
| evm.model.unitig_0.1271 | An02g07690        |
| evm.model.unitig_0.1272 | An02g07660        |
| evm.model.unitig_0.1273 | An02g07650        |
| evm.model.unitig_0.1274 | -                 |
| evm.model.unitig_0.1275 | An02g07640        |
| evm.model.unitig_0.1276 | An04g00180        |
| evm.model.unitig_0.1277 | An02g07610        |
| evm.model.unitig_0.1278 | An02g07590        |
| evm.model.unitig_0.1279 | An02g07580        |
| evm.model.unitig_0.1280 | An02g07570        |
| evm.model.unitig_0.1281 | An02g07560        |
| evm.model.unitig_0.1282 | An02g07550        |
| evm.model.unitig_0.1283 | An02g07530        |
| evm.model.unitig_0.1284 | An02g07520        |
| evm.model.unitig_0.1285 | An02g07510        |
| evm.model.unitig_0.1286 | An02g07500        |
| evm.model.unitig_0.1287 | An02g07490        |
| evm.model.unitig_0.1288 | An02g07480        |
| evm.model.unitig_0.1289 | An02g07470        |
| evm.model.unitig_0.129  | An07g01810        |
| evm.model.unitig_0.1290 | An02g07460        |
| evm.model.unitig_0.1291 | An02g07440        |
| evm.model.unitig_0.1292 | An02g07430        |
| evm.model.unitig_0.1293 | An02g07420        |
| evm.model.unitig_0.1294 | An02g07410        |

---

---

| Gene ID of H915-1       | Gene ID of 513.88 |
|-------------------------|-------------------|
| evm.model.unitig_0.1295 | An02g07400        |
| evm.model.unitig_0.1296 | An02g07390        |
| evm.model.unitig_0.1297 | An02g07380        |
| evm.model.unitig_0.1298 | An02g07370        |
| evm.model.unitig_0.1299 | An02g07360        |
| evm.model.unitig_0.13   | An07g00100        |
| evm.model.unitig_0.130  | -                 |
| evm.model.unitig_0.1300 | An02g07350        |
| evm.model.unitig_0.1301 | An02g07340        |
| evm.model.unitig_0.1302 | An02g07330        |
| evm.model.unitig_0.1303 | An02g07320        |
| evm.model.unitig_0.1304 | An02g07310        |
| evm.model.unitig_0.1305 | An02g07300        |
| evm.model.unitig_0.1306 | An02g07290        |
| evm.model.unitig_0.1307 | An02g07260        |
| evm.model.unitig_0.1308 | An02g07250        |
| evm.model.unitig_0.1309 | An02g07240        |
| evm.model.unitig_0.131  | An07g01830        |
| evm.model.unitig_0.1310 | An02g07230        |
| evm.model.unitig_0.1311 | An02g07210        |
| evm.model.unitig_0.1312 | An02g07190        |
| evm.model.unitig_0.1313 | An02g07170        |
| evm.model.unitig_0.1314 | An02g07160        |
| evm.model.unitig_0.1315 | An02g07140        |
| evm.model.unitig_0.1316 | An02g07130        |
| evm.model.unitig_0.1317 | An02g07120        |
| evm.model.unitig_0.1318 | An02g07090        |
| evm.model.unitig_0.1319 | An02g07080        |
| evm.model.unitig_0.132  | An07g01850        |
| evm.model.unitig_0.1320 | An02g07070        |
| evm.model.unitig_0.1321 | An02g07060        |
| evm.model.unitig_0.1322 | An02g07050        |
| evm.model.unitig_0.1323 | An02g07040        |
| evm.model.unitig_0.1324 | An02g07030        |
| evm.model.unitig_0.1325 | An02g07020        |
| evm.model.unitig_0.1326 | An02g07010        |
| evm.model.unitig_0.1327 | An02g07000        |
| evm.model.unitig_0.1328 | An02g06980        |
| evm.model.unitig_0.1329 | An02g06970        |
| evm.model.unitig_0.133  | An07g01870        |
| evm.model.unitig_0.1330 | An02g06960        |
| evm.model.unitig_0.1331 | An02g06940        |
| evm.model.unitig_0.1332 | An02g06910        |

---

---

| Gene ID of H915-1       | Gene ID of 513.88 |
|-------------------------|-------------------|
| evm.model.unitig_0.1333 | An02g06900        |
| evm.model.unitig_0.1334 | An02g06890        |
| evm.model.unitig_0.1335 | An02g06870        |
| evm.model.unitig_0.1336 | An02g06860        |
| evm.model.unitig_0.1337 | An02g06850        |
| evm.model.unitig_0.1338 | An02g06840        |
| evm.model.unitig_0.1339 | An02g06830        |
| evm.model.unitig_0.134  | An07g01940        |
| evm.model.unitig_0.1340 | An02g06820        |
| evm.model.unitig_0.1341 | An02g06810        |
| evm.model.unitig_0.1342 | An02g06780        |
| evm.model.unitig_0.1343 | An02g06770        |
| evm.model.unitig_0.1344 | An02g06760        |
| evm.model.unitig_0.1345 | An02g06750        |
| evm.model.unitig_0.1346 | An02g06740        |
| evm.model.unitig_0.1347 | An02g06720        |
| evm.model.unitig_0.1348 | An02g06710        |
| evm.model.unitig_0.1349 | An02g06700        |
| evm.model.unitig_0.135  | An07g01950        |
| evm.model.unitig_0.1350 | An02g06680        |
| evm.model.unitig_0.1351 | An02g06670        |
| evm.model.unitig_0.1352 | An02g06630        |
| evm.model.unitig_0.1353 | An02g06610        |
| evm.model.unitig_0.1354 | An02g06600        |
| evm.model.unitig_0.1355 | An02g06590        |
| evm.model.unitig_0.1356 | An02g06580        |
| evm.model.unitig_0.1357 | An02g06570        |
| evm.model.unitig_0.1358 | An02g06560        |
| evm.model.unitig_0.1359 | An02g06550        |
| evm.model.unitig_0.136  | An07g01960        |
| evm.model.unitig_0.1360 | An02g06530        |
| evm.model.unitig_0.1361 | An02g06520        |
| evm.model.unitig_0.1363 | An02g06470        |
| evm.model.unitig_0.1364 | An02g06460        |
| evm.model.unitig_0.1365 | An02g06450        |
| evm.model.unitig_0.1366 | An02g06440        |
| evm.model.unitig_0.1367 | An02g06430        |
| evm.model.unitig_0.1368 | An02g06420        |
| evm.model.unitig_0.1369 | An02g06400        |
| evm.model.unitig_0.137  | An07g01970        |
| evm.model.unitig_0.1370 | An02g06390        |
| evm.model.unitig_0.1371 | An02g06380        |
| evm.model.unitig_0.1372 | An02g06370        |

---

---

| Gene ID of H915-1       | Gene ID of 513.88 |
|-------------------------|-------------------|
| evm.model.unitig_0.1373 | An02g06360        |
| evm.model.unitig_0.1374 | An02g06350        |
| evm.model.unitig_0.1375 | An02g06340        |
| evm.model.unitig_0.1376 | An02g06330        |
| evm.model.unitig_0.1377 | An02g06320        |
| evm.model.unitig_0.1378 | An02g06300        |
| evm.model.unitig_0.1379 | An02g06280        |
| evm.model.unitig_0.138  | An07g01990        |
| evm.model.unitig_0.1380 | An02g06240        |
| evm.model.unitig_0.1381 | An02g06230        |
| evm.model.unitig_0.1382 | An02g06220        |
| evm.model.unitig_0.1383 | An02g06180        |
| evm.model.unitig_0.1384 | An02g06150        |
| evm.model.unitig_0.1385 | An02g06140        |
| evm.model.unitig_0.1386 | An02g06130        |
| evm.model.unitig_0.1387 | An02g06120        |
| evm.model.unitig_0.1388 | An02g06090        |
| evm.model.unitig_0.1389 | An02g06080        |
| evm.model.unitig_0.139  | An07g02000        |
| evm.model.unitig_0.1390 | An02g06070        |
| evm.model.unitig_0.1391 | An02g06060        |
| evm.model.unitig_0.1392 | An02g06050        |
| evm.model.unitig_0.1393 | An02g06040        |
| evm.model.unitig_0.1394 | An02g06030        |
| evm.model.unitig_0.1395 | An02g06020        |
| evm.model.unitig_0.1396 | An02g06010        |
| evm.model.unitig_0.1397 | An02g06000        |
| evm.model.unitig_0.1398 | An02g05930        |
| evm.model.unitig_0.1399 | An02g05920        |
| evm.model.unitig_0.140  | An07g02010        |
| evm.model.unitig_0.1400 | An02g05890        |
| evm.model.unitig_0.1401 | An02g05880        |
| evm.model.unitig_0.1402 | An02g05870        |
| evm.model.unitig_0.1403 | An02g05860        |
| evm.model.unitig_0.1404 | An02g05850        |
| evm.model.unitig_0.1405 | An02g05840        |
| evm.model.unitig_0.1406 | An02g05830        |
| evm.model.unitig_0.1407 | An02g05790        |
| evm.model.unitig_0.1408 | An02g05760        |
| evm.model.unitig_0.1409 | An02g05750        |
| evm.model.unitig_0.141  | An07g02020        |
| evm.model.unitig_0.1410 | An02g05740        |
| evm.model.unitig_0.1411 | An02g05730        |

---

---

| Gene ID of H915-1       | Gene ID of 513.88 |
|-------------------------|-------------------|
| evm.model.unitig_0.1412 | An02g05700        |
| evm.model.unitig_0.1413 | An02g05690        |
| evm.model.unitig_0.1414 | An02g05680        |
| evm.model.unitig_0.1415 | An02g05670        |
| evm.model.unitig_0.1416 | An02g05660        |
| evm.model.unitig_0.1417 | An02g05650        |
| evm.model.unitig_0.1418 | An02g05640        |
| evm.model.unitig_0.1419 | An02g05630        |
| evm.model.unitig_0.142  | An07g02040        |
| evm.model.unitig_0.1420 | An02g05610        |
| evm.model.unitig_0.1421 | An02g05600        |
| evm.model.unitig_0.1422 | An02g05590        |
| evm.model.unitig_0.1424 | An17g00640        |
| evm.model.unitig_0.1425 | An02g05560        |
| evm.model.unitig_0.1426 | An02g05540        |
| evm.model.unitig_0.1427 | An02g05530        |
| evm.model.unitig_0.1428 | An02g05490        |
| evm.model.unitig_0.1429 | An02g05480        |
| evm.model.unitig_0.143  | An07g02050        |
| evm.model.unitig_0.1430 | An02g05470        |
| evm.model.unitig_0.1431 | An02g05460        |
| evm.model.unitig_0.1432 | An02g05450        |
| evm.model.unitig_0.1433 | An02g05440        |
| evm.model.unitig_0.1434 | An02g05420        |
| evm.model.unitig_0.1435 | An02g05410        |
| evm.model.unitig_0.1436 | An02g05400        |
| evm.model.unitig_0.1437 | An02g05390        |
| evm.model.unitig_0.1438 | An02g05380        |
| evm.model.unitig_0.1439 | An02g05360        |
| evm.model.unitig_0.144  | An07g02060        |
| evm.model.unitig_0.1440 | An02g05340        |
| evm.model.unitig_0.1441 | An02g05320        |
| evm.model.unitig_0.1442 | An02g05260        |
| evm.model.unitig_0.1443 | An02g05240        |
| evm.model.unitig_0.1444 | An02g05230        |
| evm.model.unitig_0.1445 | An02g05220        |
| evm.model.unitig_0.1446 | An02g05210        |
| evm.model.unitig_0.1447 | An02g05190        |
| evm.model.unitig_0.1448 | An02g05170        |
| evm.model.unitig_0.1449 | An02g05150        |
| evm.model.unitig_0.145  | An07g02080        |
| evm.model.unitig_0.1450 | An02g05140        |
| evm.model.unitig_0.1451 | An02g05120        |

---



---

| Gene ID of H915-1       | Gene ID of 513.88 |
|-------------------------|-------------------|
| evm.model.unitig_0.1452 | An02g05100        |
| evm.model.unitig_0.1453 | An11g01150        |
| evm.model.unitig_0.1454 | An02g05080        |
| evm.model.unitig_0.1455 | An02g05070        |
| evm.model.unitig_0.1456 | An02g05060        |
| evm.model.unitig_0.1457 | An02g05010        |
| evm.model.unitig_0.1458 | An02g05000        |
| evm.model.unitig_0.1459 | An02g04990        |
| evm.model.unitig_0.146  | An07g02090        |
| evm.model.unitig_0.1460 | An02g04980        |
| evm.model.unitig_0.1461 | An02g04970        |
| evm.model.unitig_0.1462 | An02g04960        |
| evm.model.unitig_0.1463 | An02g04920        |
| evm.model.unitig_0.1464 | An02g04910        |
| evm.model.unitig_0.1465 | An02g04900        |
| evm.model.unitig_0.1466 | An02g04880        |
| evm.model.unitig_0.1467 | An02g04870        |
| evm.model.unitig_0.1468 | An02g04860        |
| evm.model.unitig_0.1469 | An02g04850        |
| evm.model.unitig_0.147  | An07g02100        |
| evm.model.unitig_0.1470 | An02g04840        |
| evm.model.unitig_0.1471 | An02g04830        |
| evm.model.unitig_0.1472 | An02g04820        |
| evm.model.unitig_0.1473 | An02g04800        |
| evm.model.unitig_0.1474 | An02g04790        |
| evm.model.unitig_0.1475 | An02g04750        |
| evm.model.unitig_0.1476 | An02g04730        |
| evm.model.unitig_0.1477 | An02g04690        |
| evm.model.unitig_0.1478 | An02g04680        |
| evm.model.unitig_0.1479 | An02g04660        |
| evm.model.unitig_0.148  | An07g02110        |
| evm.model.unitig_0.1480 | An04g08640        |
| evm.model.unitig_0.1481 | An02g04640        |
| evm.model.unitig_0.1482 | An02g04630        |
| evm.model.unitig_0.1483 | An02g04620        |
| evm.model.unitig_0.1485 | An02g04590        |
| evm.model.unitig_0.1486 | An02g04580        |
| evm.model.unitig_0.1487 | An02g04555        |
| evm.model.unitig_0.1488 | An02g04540        |
| evm.model.unitig_0.1489 | An02g04530        |
| evm.model.unitig_0.149  | An07g02130        |
| evm.model.unitig_0.1490 | An02g04520        |
| evm.model.unitig_0.1491 | An02g04510        |

---

---

| Gene ID of H915-1       | Gene ID of 513.88 |
|-------------------------|-------------------|
| evm.model.unitig_0.1492 | An02g04500        |
| evm.model.unitig_0.1493 | An02g04480        |
| evm.model.unitig_0.1494 | An02g04460        |
| evm.model.unitig_0.1495 | An02g04440        |
| evm.model.unitig_0.1496 | An02g04430        |
| evm.model.unitig_0.1497 | An02g04420        |
| evm.model.unitig_0.1498 | An02g04410        |
| evm.model.unitig_0.1499 | An02g04400        |
| evm.model.unitig_0.15   | An07g00130        |
| evm.model.unitig_0.1500 | An02g04370        |
| evm.model.unitig_0.1501 | An02g04360        |
| evm.model.unitig_0.1502 | An02g04350        |
| evm.model.unitig_0.1503 | An02g04330        |
| evm.model.unitig_0.1504 | An02g04320        |
| evm.model.unitig_0.1505 | An02g04310        |
| evm.model.unitig_0.1506 | An02g04300        |
| evm.model.unitig_0.1507 | An02g04290        |
| evm.model.unitig_0.1508 | An02g04280        |
| evm.model.unitig_0.1509 | An02g04270        |
| evm.model.unitig_0.151  | An07g02150        |
| evm.model.unitig_0.1510 | An02g04260        |
| evm.model.unitig_0.1511 | An02g04250        |
| evm.model.unitig_0.1512 | An02g04240        |
| evm.model.unitig_0.1513 | An02g04230        |
| evm.model.unitig_0.1514 | An02g04220        |
| evm.model.unitig_0.1515 | An02g04210        |
| evm.model.unitig_0.1516 | An02g04200        |
| evm.model.unitig_0.1517 | An02g04190        |
| evm.model.unitig_0.1518 | An02g04180        |
| evm.model.unitig_0.1519 | An02g04170        |
| evm.model.unitig_0.152  | An07g02160        |
| evm.model.unitig_0.1520 | An02g04160        |
| evm.model.unitig_0.1521 | An02g04150        |
| evm.model.unitig_0.1522 | An02g04130        |
| evm.model.unitig_0.1523 | An02g04120        |
| evm.model.unitig_0.1524 | An02g04110        |
| evm.model.unitig_0.1525 | An02g04100        |
| evm.model.unitig_0.1526 | An02g04080        |
| evm.model.unitig_0.1527 | An02g04070        |
| evm.model.unitig_0.1528 | An02g04060        |
| evm.model.unitig_0.1529 | An02g04050        |
| evm.model.unitig_0.153  | An07g02180        |
| evm.model.unitig_0.1530 | An02g04040        |

---

---

| Gene ID of H915-1       | Gene ID of 513.88 |
|-------------------------|-------------------|
| evm.model.unitig_0.1531 | An02g04030        |
| evm.model.unitig_0.1532 | An02g04020        |
| evm.model.unitig_0.1533 | An02g04010        |
| evm.model.unitig_0.1534 | An02g04000        |
| evm.model.unitig_0.1535 | An02g03990        |
| evm.model.unitig_0.1536 | An02g03980        |
| evm.model.unitig_0.1538 | An02g03960        |
| evm.model.unitig_0.1539 | An02g03950        |
| evm.model.unitig_0.154  | An07g02190        |
| evm.model.unitig_0.1540 | An02g03940        |
| evm.model.unitig_0.1541 | -                 |
| evm.model.unitig_0.1542 | An02g03860        |
| evm.model.unitig_0.1543 | An02g03850        |
| evm.model.unitig_0.1544 | An02g03840        |
| evm.model.unitig_0.1545 | An02g03830        |
| evm.model.unitig_0.1546 | An02g03790        |
| evm.model.unitig_0.1547 | An02g03780        |
| evm.model.unitig_0.1548 | An02g03770        |
| evm.model.unitig_0.1549 | An02g03760        |
| evm.model.unitig_0.155  | An07g02200        |
| evm.model.unitig_0.1550 | An02g03740        |
| evm.model.unitig_0.1551 | An02g03730        |
| evm.model.unitig_0.1552 | An02g03728        |
| evm.model.unitig_0.1553 | An01g07410        |
| evm.model.unitig_0.1556 | An02g03720        |
| evm.model.unitig_0.1557 | An02g03710        |
| evm.model.unitig_0.1558 | An02g03700        |
| evm.model.unitig_0.1559 | An02g03670        |
| evm.model.unitig_0.156  | An07g02210        |
| evm.model.unitig_0.1560 | An02g03650        |
| evm.model.unitig_0.1561 | An02g03630        |
| evm.model.unitig_0.1562 | An02g03620        |
| evm.model.unitig_0.1563 | An02g03600        |
| evm.model.unitig_0.1564 | An02g03590        |
| evm.model.unitig_0.1565 | An02g03580        |
| evm.model.unitig_0.1566 | An02g03570        |
| evm.model.unitig_0.1567 | An02g03540        |
| evm.model.unitig_0.1568 | An02g03520        |
| evm.model.unitig_0.1569 | An02g03510        |
| evm.model.unitig_0.157  | An07g02240        |
| evm.model.unitig_0.1570 | An02g03490        |
| evm.model.unitig_0.1571 | An02g03480        |
| evm.model.unitig_0.1572 | An02g03460        |

---

---

| Gene ID of H915-1       | Gene ID of 513.88 |
|-------------------------|-------------------|
| evm.model.unitig_0.1573 | An02g03420        |
| evm.model.unitig_0.1574 | An02g03410        |
| evm.model.unitig_0.1575 | An02g03400        |
| evm.model.unitig_0.1576 | An02g03390        |
| evm.model.unitig_0.1577 | An02g03380        |
| evm.model.unitig_0.1578 | An02g03360        |
| evm.model.unitig_0.1579 | An02g03350        |
| evm.model.unitig_0.158  | An07g02250        |
| evm.model.unitig_0.1580 | An02g03340        |
| evm.model.unitig_0.1581 | An02g03330        |
| evm.model.unitig_0.1582 | An02g03320        |
| evm.model.unitig_0.1583 | An02g03310        |
| evm.model.unitig_0.1584 | An02g03300        |
| evm.model.unitig_0.1585 | An02g03290        |
| evm.model.unitig_0.1586 | An02g03280        |
| evm.model.unitig_0.1587 | An02g03270        |
| evm.model.unitig_0.1588 | An02g03260        |
| evm.model.unitig_0.1589 | An02g03250        |
| evm.model.unitig_0.159  | An07g02270        |
| evm.model.unitig_0.1590 | An02g03240        |
| evm.model.unitig_0.1591 | An02g03230        |
| evm.model.unitig_0.1592 | An02g03220        |
| evm.model.unitig_0.1593 | An02g03210        |
| evm.model.unitig_0.1594 | An02g03200        |
| evm.model.unitig_0.1595 | An02g03190        |
| evm.model.unitig_0.1596 | An02g03180        |
| evm.model.unitig_0.1597 | An02g03160        |
| evm.model.unitig_0.1598 | An02g03140        |
| evm.model.unitig_0.1599 | An02g03120        |
| evm.model.unitig_0.16   | An07g00150        |
| evm.model.unitig_0.160  | An07g02270        |
| evm.model.unitig_0.1600 | An02g03110        |
| evm.model.unitig_0.1601 | An02g03090        |
| evm.model.unitig_0.1602 | An02g03100        |
| evm.model.unitig_0.1603 | An02g03010        |
| evm.model.unitig_0.1604 | An02g03000        |
| evm.model.unitig_0.1605 | An02g02990        |
| evm.model.unitig_0.1606 | An02g02980        |
| evm.model.unitig_0.1607 | An02g02970        |
| evm.model.unitig_0.1608 | An02g02960        |
| evm.model.unitig_0.1609 | An02g02950        |
| evm.model.unitig_0.161  | An07g02280        |
| evm.model.unitig_0.1610 | An02g02940        |

---

---

| Gene ID of H915-1       | Gene ID of 513.88 |
|-------------------------|-------------------|
| evm.model.unitig_0.1611 | An02g02930        |
| evm.model.unitig_0.1612 | An02g02920        |
| evm.model.unitig_0.1613 | An02g02910        |
| evm.model.unitig_0.1614 | An02g02890        |
| evm.model.unitig_0.1615 | An02g02880        |
| evm.model.unitig_0.1616 | An02g02870        |
| evm.model.unitig_0.1617 | An02g02860        |
| evm.model.unitig_0.1618 | An02g02840        |
| evm.model.unitig_0.1619 | An02g02830        |
| evm.model.unitig_0.162  | An07g02290        |
| evm.model.unitig_0.1620 | An02g02820        |
| evm.model.unitig_0.1621 | An02g02810        |
| evm.model.unitig_0.1622 | An02g02790        |
| evm.model.unitig_0.1623 | An02g02780        |
| evm.model.unitig_0.1624 | An02g02750        |
| evm.model.unitig_0.1625 | An02g02740        |
| evm.model.unitig_0.1626 | An02g02730        |
| evm.model.unitig_0.1627 | An02g02720        |
| evm.model.unitig_0.1628 | An02g02710        |
| evm.model.unitig_0.1629 | An02g02690        |
| evm.model.unitig_0.163  | An07g02300        |
| evm.model.unitig_0.1630 | An02g02680        |
| evm.model.unitig_0.1631 | An02g02660        |
| evm.model.unitig_0.1632 | An02g02650        |
| evm.model.unitig_0.1633 | An02g02640        |
| evm.model.unitig_0.1634 | An02g02620        |
| evm.model.unitig_0.1635 | An02g02540        |
| evm.model.unitig_0.1636 | An02g02530        |
| evm.model.unitig_0.1637 | An02g02520        |
| evm.model.unitig_0.1638 | An02g02510        |
| evm.model.unitig_0.1639 | An02g02500        |
| evm.model.unitig_0.164  | An07g02310        |
| evm.model.unitig_0.1640 | An02g02480        |
| evm.model.unitig_0.1641 | An02g02460        |
| evm.model.unitig_0.1642 | An02g02410        |
| evm.model.unitig_0.1643 | An02g02390        |
| evm.model.unitig_0.1644 | An02g02380        |
| evm.model.unitig_0.1645 | An02g02370        |
| evm.model.unitig_0.1646 | An02g02360        |
| evm.model.unitig_0.1647 | An02g02340        |
| evm.model.unitig_0.1648 | An02g02330        |
| evm.model.unitig_0.1649 | An02g02320        |
| evm.model.unitig_0.165  | An07g02350        |

---

---

| Gene ID of H915-1       | Gene ID of 513.88 |
|-------------------------|-------------------|
| evm.model.unitig_0.1650 | An12g02840        |
| evm.model.unitig_0.1651 | An02g02290        |
| evm.model.unitig_0.1652 | An02g02280        |
| evm.model.unitig_0.1653 | An02g02270        |
| evm.model.unitig_0.1654 | An02g02260        |
| evm.model.unitig_0.1655 | An02g02250        |
| evm.model.unitig_0.1656 | An02g02240        |
| evm.model.unitig_0.1657 | An02g02230        |
| evm.model.unitig_0.1658 | An02g02210        |
| evm.model.unitig_0.1659 | An02g02200        |
| evm.model.unitig_0.166  | An07g02360        |
| evm.model.unitig_0.1660 | -                 |
| evm.model.unitig_0.1661 | -                 |
| evm.model.unitig_0.1662 | An02g02190        |
| evm.model.unitig_0.1663 | An02g02180        |
| evm.model.unitig_0.1664 | An02g02170        |
| evm.model.unitig_0.1665 | An02g02150        |
| evm.model.unitig_0.1666 | An02g02070        |
| evm.model.unitig_0.1667 | An02g02060        |
| evm.model.unitig_0.1668 | An02g02040        |
| evm.model.unitig_0.1669 | An02g02030        |
| evm.model.unitig_0.167  | An07g02370        |
| evm.model.unitig_0.1670 | An02g02020        |
| evm.model.unitig_0.1671 | An02g02010        |
| evm.model.unitig_0.1672 | An02g02000        |
| evm.model.unitig_0.1673 | An02g01990        |
| evm.model.unitig_0.1674 | An02g01980        |
| evm.model.unitig_0.1675 | An02g01970        |
| evm.model.unitig_0.1676 | An02g01950        |
| evm.model.unitig_0.1677 | An02g01890        |
| evm.model.unitig_0.1678 | An02g01880        |
| evm.model.unitig_0.1679 | An02g01870        |
| evm.model.unitig_0.168  | An07g02380        |
| evm.model.unitig_0.1680 | An02g01860        |
| evm.model.unitig_0.1681 | An02g01830        |
| evm.model.unitig_0.1682 | An02g01810        |
| evm.model.unitig_0.1683 | An02g01800        |
| evm.model.unitig_0.1684 | An02g01790        |
| evm.model.unitig_0.1685 | An02g01770        |
| evm.model.unitig_0.1686 | An02g01760        |
| evm.model.unitig_0.1687 | An02g01750        |
| evm.model.unitig_0.1688 | An02g01740        |
| evm.model.unitig_0.1689 | An02g01730        |

---

---

| Gene ID of H915-1       | Gene ID of 513.88 |
|-------------------------|-------------------|
| evm.model.unitig_0.169  | An07g02390        |
| evm.model.unitig_0.1690 | An02g01720        |
| evm.model.unitig_0.1691 | An02g01700        |
| evm.model.unitig_0.1692 | An02g01690        |
| evm.model.unitig_0.1693 | An02g01680        |
| evm.model.unitig_0.1694 | -                 |
| evm.model.unitig_0.1695 | An02g01650        |
| evm.model.unitig_0.1696 | An02g01640        |
| evm.model.unitig_0.1697 | An02g01630        |
| evm.model.unitig_0.1698 | An02g01620        |
| evm.model.unitig_0.1699 | An02g01610        |
| evm.model.unitig_0.17   | An07g00200        |
| evm.model.unitig_0.170  | An07g02400        |
| evm.model.unitig_0.1700 | An02g01600        |
| evm.model.unitig_0.1701 | An02g01590        |
| evm.model.unitig_0.1702 | An02g01580        |
| evm.model.unitig_0.1703 | -                 |
| evm.model.unitig_0.1704 | An02g01570        |
| evm.model.unitig_0.1705 | An02g01560        |
| evm.model.unitig_0.1706 | An02g01550        |
| evm.model.unitig_0.1707 | An02g01540        |
| evm.model.unitig_0.1708 | An02g01530        |
| evm.model.unitig_0.1709 | An02g01520        |
| evm.model.unitig_0.171  | -                 |
| evm.model.unitig_0.1710 | An02g01510        |
| evm.model.unitig_0.1711 | An02g01500        |
| evm.model.unitig_0.1712 | An02g01490        |
| evm.model.unitig_0.1713 | An02g01480        |
| evm.model.unitig_0.1714 | An02g01470        |
| evm.model.unitig_0.1716 | An02g01430        |
| evm.model.unitig_0.1717 | An02g01420        |
| evm.model.unitig_0.1718 | An02g01400        |
| evm.model.unitig_0.1719 | An02g01390        |
| evm.model.unitig_0.172  | -                 |
| evm.model.unitig_0.1721 | An02g01370        |
| evm.model.unitig_0.1722 | An02g01360        |
| evm.model.unitig_0.1723 | An02g01350        |
| evm.model.unitig_0.1724 | An02g01330        |
| evm.model.unitig_0.1725 | An02g01320        |
| evm.model.unitig_0.1726 | An02g01290        |
| evm.model.unitig_0.1727 | An02g01270        |
| evm.model.unitig_0.1728 | -                 |
| evm.model.unitig_0.1729 | An02g01260        |

---

---

| Gene ID of H915-1       | Gene ID of 513.88 |
|-------------------------|-------------------|
| evm.model.unitig_0.1730 | An02g01255        |
| evm.model.unitig_0.1731 | An02g01250        |
| evm.model.unitig_0.1732 | An02g01240        |
| evm.model.unitig_0.1733 | An02g01220        |
| evm.model.unitig_0.1734 | An02g01210        |
| evm.model.unitig_0.1735 | An02g01200        |
| evm.model.unitig_0.1736 | An02g01180        |
| evm.model.unitig_0.1737 | An02g01160        |
| evm.model.unitig_0.1738 | An02g01140        |
| evm.model.unitig_0.1739 | An02g01110        |
| evm.model.unitig_0.174  | An07g02440        |
| evm.model.unitig_0.1740 | An02g01100        |
| evm.model.unitig_0.1741 | An02g01090        |
| evm.model.unitig_0.1742 | An02g01080        |
| evm.model.unitig_0.1743 | An02g01070        |
| evm.model.unitig_0.1744 | An02g01050        |
| evm.model.unitig_0.1745 | An02g01040        |
| evm.model.unitig_0.1746 | An02g01040        |
| evm.model.unitig_0.1747 | An02g01000        |
| evm.model.unitig_0.1748 | An02g00990        |
| evm.model.unitig_0.1749 | An02g00980        |
| evm.model.unitig_0.175  | An07g02450        |
| evm.model.unitig_0.1750 | An02g00970        |
| evm.model.unitig_0.1751 | An02g00960        |
| evm.model.unitig_0.1753 | An02g00910        |
| evm.model.unitig_0.1754 | An02g00890        |
| evm.model.unitig_0.1755 | An02g00880        |
| evm.model.unitig_0.1756 | An02g00870        |
| evm.model.unitig_0.1757 | An02g00850        |
| evm.model.unitig_0.1758 | An02g00840        |
| evm.model.unitig_0.1759 | An02g00810        |
| evm.model.unitig_0.176  | An07g02510        |
| evm.model.unitig_0.1760 | An02g00780        |
| evm.model.unitig_0.1761 | An02g00760        |
| evm.model.unitig_0.1762 | An02g00750        |
| evm.model.unitig_0.1763 | An02g00740        |
| evm.model.unitig_0.1765 | An02g00700        |
| evm.model.unitig_0.1767 | An02g00670        |
| evm.model.unitig_0.1768 | An02g00660        |
| evm.model.unitig_0.1769 | An02g00610        |
| evm.model.unitig_0.177  | An07g02530        |
| evm.model.unitig_0.1770 | An02g00590        |
| evm.model.unitig_0.1771 | An02g00580        |

---



---

| Gene ID of H915-1       | Gene ID of 513.88 |
|-------------------------|-------------------|
| evm.model.unitig_0.1772 | An02g00560        |
| evm.model.unitig_0.1773 | An02g00540        |
| evm.model.unitig_0.1774 | An02g00500        |
| evm.model.unitig_0.1775 | An02g00490        |
| evm.model.unitig_0.1776 | An02g00470        |
| evm.model.unitig_0.1777 | An02g00470        |
| evm.model.unitig_0.1779 | An02g00460        |
| evm.model.unitig_0.178  | An07g02540        |
| evm.model.unitig_0.1780 | An03g05140        |
| evm.model.unitig_0.1781 | An02g00420        |
| evm.model.unitig_0.1782 | An02g00400        |
| evm.model.unitig_0.1783 | An02g00390        |
| evm.model.unitig_0.1784 | An06g00670        |
| evm.model.unitig_0.1785 | An02g00350        |
| evm.model.unitig_0.1786 | An02g00340        |
| evm.model.unitig_0.1787 | An02g00320        |
| evm.model.unitig_0.1788 | An02g00310        |
| evm.model.unitig_0.1789 | An02g00290        |
| evm.model.unitig_0.179  | An07g02560        |
| evm.model.unitig_0.1790 | An02g00260        |
| evm.model.unitig_0.1791 | An02g00260        |
| evm.model.unitig_0.1792 | An02g00250        |
| evm.model.unitig_0.1793 | An02g00240        |
| evm.model.unitig_0.1794 | An02g00230        |
| evm.model.unitig_0.1795 | An02g00220        |
| evm.model.unitig_0.1796 | An02g00210        |
| evm.model.unitig_0.1797 | An02g00200        |
| evm.model.unitig_0.1798 | An02g00190        |
| evm.model.unitig_0.1799 | An02g00180        |
| evm.model.unitig_0.18   | An07g00230        |
| evm.model.unitig_0.180  | An07g02570        |
| evm.model.unitig_0.1800 | An02g00170        |
| evm.model.unitig_0.1801 | An02g00160        |
| evm.model.unitig_0.1802 | An02g00150        |
| evm.model.unitig_0.1803 | An02g00140        |
| evm.model.unitig_0.1805 | An02g00120        |
| evm.model.unitig_0.1806 | An02g00110        |
| evm.model.unitig_0.1807 | An02g00090        |
| evm.model.unitig_0.1808 | An02g00080        |
| evm.model.unitig_0.1809 | An02g00070        |
| evm.model.unitig_0.1810 | An02g00060        |
| evm.model.unitig_0.1811 | -                 |
| evm.model.unitig_0.1812 | An02g00050        |

---

---

| Gene ID of H915-1       | Gene ID of 513.88 |
|-------------------------|-------------------|
| evm.model.unitig_0.1813 | An02g00050        |
| evm.model.unitig_0.1814 | An02g00040        |
| evm.model.unitig_0.1815 | An02g00030        |
| evm.model.unitig_0.1816 | An12g05070        |
| evm.model.unitig_0.1817 | An02g06350        |
| evm.model.unitig_0.1820 | An03g00140        |
| evm.model.unitig_0.1821 | An14g07360        |
| evm.model.unitig_0.1823 | An11g10970        |
| evm.model.unitig_0.1824 | An16g00740        |
| evm.model.unitig_0.1825 | An11g04030        |
| evm.model.unitig_0.1826 | An07g04020        |
| evm.model.unitig_0.1827 | An18g00230        |
| evm.model.unitig_0.1829 | An04g04320        |
| evm.model.unitig_0.184  | An07g02650        |
| evm.model.unitig_0.185  | An07g02680        |
| evm.model.unitig_0.186  | An07g02690        |
| evm.model.unitig_0.187  | An07g02700        |
| evm.model.unitig_0.188  | An07g02730        |
| evm.model.unitig_0.189  | An07g02760        |
| evm.model.unitig_0.19   | An07g00240        |
| evm.model.unitig_0.190  | An07g02760        |
| evm.model.unitig_0.191  | An07g02770        |
| evm.model.unitig_0.192  | An07g02780        |
| evm.model.unitig_0.194  | An07g02800        |
| evm.model.unitig_0.195  | An07g02810        |
| evm.model.unitig_0.196  | An07g02820        |
| evm.model.unitig_0.197  | An07g02840        |
| evm.model.unitig_0.198  | An07g02860        |
| evm.model.unitig_0.199  | An07g02870        |
| evm.model.unitig_0.2    | An12g08270        |
| evm.model.unitig_0.20   | An07g00250        |
| evm.model.unitig_0.200  | An07g02880        |
| evm.model.unitig_0.201  | An07g02890        |
| evm.model.unitig_0.202  | An07g02900        |
| evm.model.unitig_0.203  | An07g02930        |
| evm.model.unitig_0.204  | An07g02960        |
| evm.model.unitig_0.205  | An07g02970        |
| evm.model.unitig_0.206  | An07g02990        |
| evm.model.unitig_0.207  | An07g03000        |
| evm.model.unitig_0.208  | An07g03005        |
| evm.model.unitig_0.209  | An07g03020        |
| evm.model.unitig_0.21   | An07g00260        |
| evm.model.unitig_0.210  | An07g03040        |

---

---

| Gene ID of H915-1      | Gene ID of 513.88 |
|------------------------|-------------------|
| evm.model.unitig_0.211 | An07g03050        |
| evm.model.unitig_0.212 | An07g03070        |
| evm.model.unitig_0.213 | An07g03080        |
| evm.model.unitig_0.214 | An07g03090        |
| evm.model.unitig_0.215 | An07g03100        |
| evm.model.unitig_0.216 | An07g03110        |
| evm.model.unitig_0.217 | An07g03120        |
| evm.model.unitig_0.218 | An07g03130        |
| evm.model.unitig_0.219 | An07g03140        |
| evm.model.unitig_0.22  | An07g00280        |
| evm.model.unitig_0.220 | An07g03150        |
| evm.model.unitig_0.221 | An07g03160        |
| evm.model.unitig_0.222 | An07g03170        |
| evm.model.unitig_0.223 | An07g03190        |
| evm.model.unitig_0.224 | An07g03200        |
| evm.model.unitig_0.225 | An07g03210        |
| evm.model.unitig_0.226 | An07g03220        |
| evm.model.unitig_0.227 | An07g03250        |
| evm.model.unitig_0.228 | An07g03260        |
| evm.model.unitig_0.229 | An07g03270        |
| evm.model.unitig_0.23  | An07g00290        |
| evm.model.unitig_0.230 | An07g03280        |
| evm.model.unitig_0.231 | An07g03290        |
| evm.model.unitig_0.232 | An07g03300        |
| evm.model.unitig_0.233 | An07g03320        |
| evm.model.unitig_0.234 | An07g03330        |
| evm.model.unitig_0.235 | An01g05470        |
| evm.model.unitig_0.236 | An07g03340        |
| evm.model.unitig_0.237 | An07g03360        |
| evm.model.unitig_0.238 | An07g03370        |
| evm.model.unitig_0.239 | An07g03380        |
| evm.model.unitig_0.24  | An07g00300        |
| evm.model.unitig_0.241 | An07g03390        |
| evm.model.unitig_0.242 | An07g03410        |
| evm.model.unitig_0.243 | An07g03420        |
| evm.model.unitig_0.244 | An07g03430        |
| evm.model.unitig_0.245 | An07g03440        |
| evm.model.unitig_0.246 | An07g03450        |
| evm.model.unitig_0.247 | An07g03460        |
| evm.model.unitig_0.248 | An07g03470        |
| evm.model.unitig_0.249 | An07g03520        |
| evm.model.unitig_0.25  | An07g00310        |
| evm.model.unitig_0.250 | An12g04180        |

---

---

| Gene ID of H915-1      | Gene ID of 513.88 |
|------------------------|-------------------|
| evm.model.unitig_0.251 | An11g09540        |
| evm.model.unitig_0.252 | An02g00500        |
| evm.model.unitig_0.253 | An07g03570        |
| evm.model.unitig_0.254 | An07g03590        |
| evm.model.unitig_0.255 | An07g03600        |
| evm.model.unitig_0.256 | An07g03610        |
| evm.model.unitig_0.257 | An07g03620        |
| evm.model.unitig_0.258 | An07g03630        |
| evm.model.unitig_0.259 | -                 |
| evm.model.unitig_0.26  | An07g00320        |
| evm.model.unitig_0.260 | An07g03660        |
| evm.model.unitig_0.261 | An07g03670        |
| evm.model.unitig_0.262 | An07g03680        |
| evm.model.unitig_0.263 | An07g03690        |
| evm.model.unitig_0.264 | An07g03710        |
| evm.model.unitig_0.265 | An07g03720        |
| evm.model.unitig_0.266 | An07g03730        |
| evm.model.unitig_0.267 | An07g03740        |
| evm.model.unitig_0.268 | An07g03750        |
| evm.model.unitig_0.269 | An07g03760        |
| evm.model.unitig_0.27  | An07g00330        |
| evm.model.unitig_0.270 | An07g03770        |
| evm.model.unitig_0.271 | An07g03850        |
| evm.model.unitig_0.272 | An07g03860        |
| evm.model.unitig_0.273 | An07g03880        |
| evm.model.unitig_0.274 | An07g03890        |
| evm.model.unitig_0.275 | An07g03920        |
| evm.model.unitig_0.276 | An07g03930        |
| evm.model.unitig_0.277 | An07g03940        |
| evm.model.unitig_0.278 | An07g03950        |
| evm.model.unitig_0.279 | An07g03960        |
| evm.model.unitig_0.280 | An07g03970        |
| evm.model.unitig_0.281 | An07g03980        |
| evm.model.unitig_0.282 | An07g03990        |
| evm.model.unitig_0.283 | An07g04000        |
| evm.model.unitig_0.284 | An07g04010        |
| evm.model.unitig_0.285 | An07g04020        |
| evm.model.unitig_0.286 | An07g04030        |
| evm.model.unitig_0.287 | An07g04040        |
| evm.model.unitig_0.288 | An07g04070        |
| evm.model.unitig_0.289 | An07g04120        |
| evm.model.unitig_0.29  | An07g00350        |
| evm.model.unitig_0.290 | An07g04130        |

---

---

| Gene ID of H915-1      | Gene ID of 513.88 |
|------------------------|-------------------|
| evm.model.unitig_0.291 | An07g04160        |
| evm.model.unitig_0.292 | An07g04170        |
| evm.model.unitig_0.293 | An07g04180        |
| evm.model.unitig_0.294 | An07g04190        |
| evm.model.unitig_0.295 | An07g04200        |
| evm.model.unitig_0.296 | An07g04240        |
| evm.model.unitig_0.297 | An07g04250        |
| evm.model.unitig_0.298 | An07g04260        |
| evm.model.unitig_0.299 | An07g04270        |
| evm.model.unitig_0.30  | An07g00360        |
| evm.model.unitig_0.300 | An07g04280        |
| evm.model.unitig_0.301 | An07g04290        |
| evm.model.unitig_0.302 | An07g04300        |
| evm.model.unitig_0.303 | An07g04320        |
| evm.model.unitig_0.304 | An07g04330        |
| evm.model.unitig_0.305 | An07g04350        |
| evm.model.unitig_0.306 | An07g04390        |
| evm.model.unitig_0.307 | An16g01460        |
| evm.model.unitig_0.308 | An07g04420        |
| evm.model.unitig_0.309 | An07g04430        |
| evm.model.unitig_0.31  | An07g00370        |
| evm.model.unitig_0.310 | An07g04470        |
| evm.model.unitig_0.311 | An07g04480        |
| evm.model.unitig_0.312 | An07g04490        |
| evm.model.unitig_0.313 | An07g04500        |
| evm.model.unitig_0.314 | An07g04510        |
| evm.model.unitig_0.315 | An07g04520        |
| evm.model.unitig_0.316 | An07g04540        |
| evm.model.unitig_0.317 | An07g04560        |
| evm.model.unitig_0.318 | An07g04580        |
| evm.model.unitig_0.319 | An07g04590        |
| evm.model.unitig_0.32  | An07g00380        |
| evm.model.unitig_0.320 | An07g04610        |
| evm.model.unitig_0.321 | An07g04620        |
| evm.model.unitig_0.322 | An07g04640        |
| evm.model.unitig_0.323 | An07g04650        |
| evm.model.unitig_0.324 | An07g04660        |
| evm.model.unitig_0.325 | An07g04700        |
| evm.model.unitig_0.326 | An07g04730        |
| evm.model.unitig_0.328 | An07g04770        |
| evm.model.unitig_0.329 | An07g04780        |
| evm.model.unitig_0.33  | An07g00400        |
| evm.model.unitig_0.330 | An07g04800        |

---

---

| Gene ID of H915-1      | Gene ID of 513.88 |
|------------------------|-------------------|
| evm.model.unitig_0.331 | An07g04810        |
| evm.model.unitig_0.332 | An07g04820        |
| evm.model.unitig_0.333 | An07g04830        |
| evm.model.unitig_0.334 | An07g04840        |
| evm.model.unitig_0.335 | An07g04850        |
| evm.model.unitig_0.337 | An07g04860        |
| evm.model.unitig_0.338 | An11g05110        |
| evm.model.unitig_0.339 | An07g04880        |
| evm.model.unitig_0.34  | -                 |
| evm.model.unitig_0.340 | An07g04910        |
| evm.model.unitig_0.341 | An07g04920        |
| evm.model.unitig_0.342 | An07g04930        |
| evm.model.unitig_0.343 | An07g04940        |
| evm.model.unitig_0.344 | An07g04960        |
| evm.model.unitig_0.345 | An11g09010        |
| evm.model.unitig_0.346 | An07g04980        |
| evm.model.unitig_0.347 | An07g04990        |
| evm.model.unitig_0.348 | An07g05000        |
| evm.model.unitig_0.349 | An07g05010        |
| evm.model.unitig_0.35  | An07g00440        |
| evm.model.unitig_0.350 | An07g05020        |
| evm.model.unitig_0.351 | An07g05030        |
| evm.model.unitig_0.352 | An07g05040        |
| evm.model.unitig_0.353 | An07g05050        |
| evm.model.unitig_0.354 | An07g05060        |
| evm.model.unitig_0.355 | An07g05080        |
| evm.model.unitig_0.356 | An07g05090        |
| evm.model.unitig_0.357 | An07g05100        |
| evm.model.unitig_0.358 | An07g05110        |
| evm.model.unitig_0.359 | An07g05130        |
| evm.model.unitig_0.36  | An07g00450        |
| evm.model.unitig_0.360 | An07g05140        |
| evm.model.unitig_0.361 | An07g05150        |
| evm.model.unitig_0.362 | An07g05160        |
| evm.model.unitig_0.363 | An07g05170        |
| evm.model.unitig_0.364 | An07g05180        |
| evm.model.unitig_0.365 | An07g05210        |
| evm.model.unitig_0.366 | An07g05230        |
| evm.model.unitig_0.368 | An07g05260        |
| evm.model.unitig_0.369 | An07g05280        |
| evm.model.unitig_0.37  | An07g00470        |
| evm.model.unitig_0.370 | An07g05290        |
| evm.model.unitig_0.371 | An07g05350        |

---

---

| Gene ID of H915-1      | Gene ID of 513.88 |
|------------------------|-------------------|
| evm.model.unitig_0.372 | -                 |
| evm.model.unitig_0.373 | An07g05370        |
| evm.model.unitig_0.374 | An07g05380        |
| evm.model.unitig_0.375 | An07g05410        |
| evm.model.unitig_0.376 | An07g05430        |
| evm.model.unitig_0.377 | An07g05440        |
| evm.model.unitig_0.379 | An07g05460        |
| evm.model.unitig_0.38  | An07g00480        |
| evm.model.unitig_0.380 | An03g01570        |
| evm.model.unitig_0.381 | An07g05500        |
| evm.model.unitig_0.382 | An07g05510        |
| evm.model.unitig_0.383 | An07g05520        |
| evm.model.unitig_0.384 | An07g05550        |
| evm.model.unitig_0.385 | An07g05570        |
| evm.model.unitig_0.386 | An07g05600        |
| evm.model.unitig_0.387 | An07g05610        |
| evm.model.unitig_0.388 | An07g05620        |
| evm.model.unitig_0.389 | An07g05630        |
| evm.model.unitig_0.39  | An07g00510        |
| evm.model.unitig_0.390 | An07g05640        |
| evm.model.unitig_0.391 | An07g05650        |
| evm.model.unitig_0.392 | An07g05660        |
| evm.model.unitig_0.393 | An07g05670        |
| evm.model.unitig_0.394 | An07g05690        |
| evm.model.unitig_0.395 | An07g05710        |
| evm.model.unitig_0.396 | An07g05730        |
| evm.model.unitig_0.397 | An07g05740        |
| evm.model.unitig_0.398 | An07g05750        |
| evm.model.unitig_0.399 | An07g05760        |
| evm.model.unitig_0.4   | An03g06700        |
| evm.model.unitig_0.40  | An07g00520        |
| evm.model.unitig_0.400 | An07g05780        |
| evm.model.unitig_0.401 | An07g05790        |
| evm.model.unitig_0.402 | An07g05800        |
| evm.model.unitig_0.403 | An07g05810        |
| evm.model.unitig_0.404 | An07g05820        |
| evm.model.unitig_0.405 | An07g05830        |
| evm.model.unitig_0.406 | An07g05880        |
| evm.model.unitig_0.407 | An07g05900        |
| evm.model.unitig_0.408 | An07g05920        |
| evm.model.unitig_0.409 | An07g05930        |
| evm.model.unitig_0.41  | An07g00530        |
| evm.model.unitig_0.410 | An07g05940        |

---

---

| Gene ID of H915-1      | Gene ID of 513.88 |
|------------------------|-------------------|
| evm.model.unitig_0.411 | An07g05960        |
| evm.model.unitig_0.412 | -                 |
| evm.model.unitig_0.413 | An07g05970        |
| evm.model.unitig_0.414 | An07g05970        |
| evm.model.unitig_0.415 | An07g05980        |
| evm.model.unitig_0.416 | -                 |
| evm.model.unitig_0.417 | An07g05990        |
| evm.model.unitig_0.418 | An07g06000        |
| evm.model.unitig_0.419 | An07g06010        |
| evm.model.unitig_0.42  | An07g00540        |
| evm.model.unitig_0.420 | An07g06020        |
| evm.model.unitig_0.421 | An07g06030        |
| evm.model.unitig_0.422 | An07g06040        |
| evm.model.unitig_0.423 | An07g06050        |
| evm.model.unitig_0.424 | An07g06080        |
| evm.model.unitig_0.425 | An07g06100        |
| evm.model.unitig_0.426 | An07g06130        |
| evm.model.unitig_0.427 | An07g06140        |
| evm.model.unitig_0.428 | An07g06150        |
| evm.model.unitig_0.429 | An07g06160        |
| evm.model.unitig_0.43  | An07g00550        |
| evm.model.unitig_0.430 | An07g06190        |
| evm.model.unitig_0.431 | An07g06200        |
| evm.model.unitig_0.434 | An07g06240        |
| evm.model.unitig_0.435 | An07g06270        |
| evm.model.unitig_0.436 | An07g06280        |
| evm.model.unitig_0.437 | An07g06300        |
| evm.model.unitig_0.438 | An07g06310        |
| evm.model.unitig_0.439 | An07g06330        |
| evm.model.unitig_0.44  | An07g00570        |
| evm.model.unitig_0.440 | An07g06340        |
| evm.model.unitig_0.441 | An07g06350        |
| evm.model.unitig_0.442 | An07g06360        |
| evm.model.unitig_0.443 | An07g06370        |
| evm.model.unitig_0.444 | An07g06380        |
| evm.model.unitig_0.445 | An07g06390        |
| evm.model.unitig_0.446 | An07g06400        |
| evm.model.unitig_0.447 | An07g06420        |
| evm.model.unitig_0.448 | An07g06430        |
| evm.model.unitig_0.449 | An02g03670        |
| evm.model.unitig_0.45  | An07g00580        |
| evm.model.unitig_0.450 | An07g06460        |
| evm.model.unitig_0.451 | An07g06480        |

---



---

| Gene ID of H915-1      | Gene ID of 513.88 |
|------------------------|-------------------|
| evm.model.unitig_0.452 | An07g06490        |
| evm.model.unitig_0.453 | An07g06500        |
| evm.model.unitig_0.454 | An07g06510        |
| evm.model.unitig_0.455 | An07g06520        |
| evm.model.unitig_0.456 | An07g06530        |
| evm.model.unitig_0.457 | An07g06540        |
| evm.model.unitig_0.458 | An07g06550        |
| evm.model.unitig_0.459 | An07g06570        |
| evm.model.unitig_0.46  | An07g00590        |
| evm.model.unitig_0.460 | An07g06580        |
| evm.model.unitig_0.461 | An07g06590        |
| evm.model.unitig_0.462 | An07g06600        |
| evm.model.unitig_0.463 | An07g06610        |
| evm.model.unitig_0.464 | An07g06630        |
| evm.model.unitig_0.465 | An07g06640        |
| evm.model.unitig_0.466 | An07g01830        |
| evm.model.unitig_0.467 | An07g06700        |
| evm.model.unitig_0.468 | An04g09660        |
| evm.model.unitig_0.469 | An07g06730        |
| evm.model.unitig_0.47  | An07g00620        |
| evm.model.unitig_0.470 | An07g06740        |
| evm.model.unitig_0.471 | An07g06750        |
| evm.model.unitig_0.472 | An07g06760        |
| evm.model.unitig_0.473 | An07g06770        |
| evm.model.unitig_0.474 | An07g06780        |
| evm.model.unitig_0.475 | An04g06250        |
| evm.model.unitig_0.476 | An07g06820        |
| evm.model.unitig_0.477 | An07g06840        |
| evm.model.unitig_0.478 | An07g06880        |
| evm.model.unitig_0.479 | An07g06910        |
| evm.model.unitig_0.48  | An07g00630        |
| evm.model.unitig_0.480 | An07g06960        |
| evm.model.unitig_0.481 | An07g06980        |
| evm.model.unitig_0.482 | An07g06990        |
| evm.model.unitig_0.483 | An07g07000        |
| evm.model.unitig_0.484 | An07g07010        |
| evm.model.unitig_0.485 | An07g07020        |
| evm.model.unitig_0.486 | An07g07050        |
| evm.model.unitig_0.487 | An07g07060        |
| evm.model.unitig_0.488 | An07g07090        |
| evm.model.unitig_0.489 | An07g07100        |
| evm.model.unitig_0.49  | An07g00640        |
| evm.model.unitig_0.490 | An07g07110        |

---

---

| Gene ID of H915-1      | Gene ID of 513.88 |
|------------------------|-------------------|
| evm.model.unitig_0.491 | An07g07140        |
| evm.model.unitig_0.492 | An07g07150        |
| evm.model.unitig_0.493 | An07g07160        |
| evm.model.unitig_0.494 | An07g07170        |
| evm.model.unitig_0.495 | An07g07180        |
| evm.model.unitig_0.496 | An07g07190        |
| evm.model.unitig_0.497 | An07g07210        |
| evm.model.unitig_0.498 | An07g07240        |
| evm.model.unitig_0.499 | An07g07250        |
| evm.model.unitig_0.5   | An11g06460        |
| evm.model.unitig_0.50  | An07g00670        |
| evm.model.unitig_0.500 | An07g07260        |
| evm.model.unitig_0.501 | An07g07280        |
| evm.model.unitig_0.502 | -                 |
| evm.model.unitig_0.503 | An07g07290        |
| evm.model.unitig_0.504 | An07g07300        |
| evm.model.unitig_0.505 | An07g07310        |
| evm.model.unitig_0.506 | An07g07320        |
| evm.model.unitig_0.507 | An07g07340        |
| evm.model.unitig_0.509 | An07g07370        |
| evm.model.unitig_0.51  | An07g00680        |
| evm.model.unitig_0.510 | An07g07380        |
| evm.model.unitig_0.511 | An07g07390        |
| evm.model.unitig_0.512 | An07g07400        |
| evm.model.unitig_0.513 | An07g07420        |
| evm.model.unitig_0.514 | An07g07430        |
| evm.model.unitig_0.515 | An07g07450        |
| evm.model.unitig_0.516 | An07g07460        |
| evm.model.unitig_0.517 | An07g07470        |
| evm.model.unitig_0.518 | An07g07480        |
| evm.model.unitig_0.519 | An07g07500        |
| evm.model.unitig_0.52  | An07g00700        |
| evm.model.unitig_0.520 | An07g07510        |
| evm.model.unitig_0.521 | An07g07520        |
| evm.model.unitig_0.522 | An07g07530        |
| evm.model.unitig_0.523 | An07g07550        |
| evm.model.unitig_0.524 | An07g07560        |
| evm.model.unitig_0.525 | An07g07570        |
| evm.model.unitig_0.526 | An07g07580        |
| evm.model.unitig_0.527 | An07g07590        |
| evm.model.unitig_0.528 | An07g07610        |
| evm.model.unitig_0.529 | An07g00850        |
| evm.model.unitig_0.53  | An07g00730        |

---

---

| Gene ID of H915-1      | Gene ID of 513.88 |
|------------------------|-------------------|
| evm.model.unitig_0.530 | An07g07630        |
| evm.model.unitig_0.531 | An07g07650        |
| evm.model.unitig_0.532 | An07g07670        |
| evm.model.unitig_0.533 | An07g07680        |
| evm.model.unitig_0.534 | An07g07690        |
| evm.model.unitig_0.535 | An07g07700        |
| evm.model.unitig_0.536 | An07g07740        |
| evm.model.unitig_0.537 | An07g07760        |
| evm.model.unitig_0.538 | An07g07780        |
| evm.model.unitig_0.539 | An07g07790        |
| evm.model.unitig_0.54  | An07g00750        |
| evm.model.unitig_0.540 | An07g07800        |
| evm.model.unitig_0.541 | An07g07810        |
| evm.model.unitig_0.542 | An07g07820        |
| evm.model.unitig_0.543 | An07g07830        |
| evm.model.unitig_0.544 | An07g07840        |
| evm.model.unitig_0.545 | An07g07850        |
| evm.model.unitig_0.546 | An07g07860        |
| evm.model.unitig_0.547 | An07g07870        |
| evm.model.unitig_0.548 | An07g07880        |
| evm.model.unitig_0.549 | An07g07910        |
| evm.model.unitig_0.55  | An07g00760        |
| evm.model.unitig_0.550 | An07g07930        |
| evm.model.unitig_0.551 | An07g07940        |
| evm.model.unitig_0.552 | An07g07970        |
| evm.model.unitig_0.553 | An07g07980        |
| evm.model.unitig_0.554 | An07g08010        |
| evm.model.unitig_0.555 | An07g08030        |
| evm.model.unitig_0.556 | An16g01690        |
| evm.model.unitig_0.557 | An07g08100        |
| evm.model.unitig_0.558 | An07g08140        |
| evm.model.unitig_0.56  | An07g00790        |
| evm.model.unitig_0.560 | An07g08160        |
| evm.model.unitig_0.561 | An07g08170        |
| evm.model.unitig_0.562 | An07g08190        |
| evm.model.unitig_0.563 | An07g08200        |
| evm.model.unitig_0.564 | An07g08210        |
| evm.model.unitig_0.565 | An07g08220        |
| evm.model.unitig_0.566 | An07g08240        |
| evm.model.unitig_0.567 | An07g08250        |
| evm.model.unitig_0.568 | An07g08280        |
| evm.model.unitig_0.569 | An07g08290        |
| evm.model.unitig_0.570 | An07g08300        |

---

---

| Gene ID of H915-1      | Gene ID of 513.88 |
|------------------------|-------------------|
| evm.model.unitig_0.571 | An07g08310        |
| evm.model.unitig_0.572 | An07g08320        |
| evm.model.unitig_0.573 | An07g08330        |
| evm.model.unitig_0.574 | An07g08340        |
| evm.model.unitig_0.575 | An07g08350        |
| evm.model.unitig_0.576 | An07g08360        |
| evm.model.unitig_0.577 | An07g08370        |
| evm.model.unitig_0.578 | An07g08380        |
| evm.model.unitig_0.579 | An07g08390        |
| evm.model.unitig_0.58  | An07g00810        |
| evm.model.unitig_0.580 | An07g08400        |
| evm.model.unitig_0.581 | An11g06480        |
| evm.model.unitig_0.582 | An07g08430        |
| evm.model.unitig_0.583 | An07g08470        |
| evm.model.unitig_0.584 | An07g08490        |
| evm.model.unitig_0.585 | An07g08520        |
| evm.model.unitig_0.587 | An07g08590        |
| evm.model.unitig_0.588 | An07g08600        |
| evm.model.unitig_0.589 | An07g08610        |
| evm.model.unitig_0.59  | An04g03400        |
| evm.model.unitig_0.590 | An07g08620        |
| evm.model.unitig_0.591 | An07g08630        |
| evm.model.unitig_0.592 | An07g08640        |
| evm.model.unitig_0.593 | An07g08650        |
| evm.model.unitig_0.594 | An07g08690        |
| evm.model.unitig_0.595 | An07g08710        |
| evm.model.unitig_0.596 | An07g08720        |
| evm.model.unitig_0.597 | An07g08730        |
| evm.model.unitig_0.598 | An07g08740        |
| evm.model.unitig_0.599 | An07g08750        |
| evm.model.unitig_0.6   | An07g00010        |
| evm.model.unitig_0.60  | An16g07700        |
| evm.model.unitig_0.600 | An07g08760        |
| evm.model.unitig_0.601 | An07g08770        |
| evm.model.unitig_0.602 | An07g08810        |
| evm.model.unitig_0.603 | An07g08820        |
| evm.model.unitig_0.604 | An07g08830        |
| evm.model.unitig_0.605 | An07g08850        |
| evm.model.unitig_0.606 | An07g08860        |
| evm.model.unitig_0.607 | An07g08870        |
| evm.model.unitig_0.608 | An07g08880        |
| evm.model.unitig_0.609 | An07g08890        |
| evm.model.unitig_0.61  | An12g10110        |

---

---

| Gene ID of H915-1      | Gene ID of 513.88 |
|------------------------|-------------------|
| evm.model.unitig_0.610 | An07g08900        |
| evm.model.unitig_0.611 | An07g08910        |
| evm.model.unitig_0.612 | An03g03030        |
| evm.model.unitig_0.613 | An07g08920        |
| evm.model.unitig_0.614 | An07g08930        |
| evm.model.unitig_0.615 | An07g08940        |
| evm.model.unitig_0.616 | An07g08950        |
| evm.model.unitig_0.617 | An07g08960        |
| evm.model.unitig_0.618 | An07g08970        |
| evm.model.unitig_0.619 | An07g08980        |
| evm.model.unitig_0.62  | An15g04620        |
| evm.model.unitig_0.620 | An07g08990        |
| evm.model.unitig_0.621 | An07g09005        |
| evm.model.unitig_0.622 | An07g09010        |
| evm.model.unitig_0.623 | An07g09020        |
| evm.model.unitig_0.624 | An07g09040        |
| evm.model.unitig_0.625 | An07g09050        |
| evm.model.unitig_0.626 | An07g09060        |
| evm.model.unitig_0.627 | An07g09070        |
| evm.model.unitig_0.628 | An07g09090        |
| evm.model.unitig_0.629 | An07g09110        |
| evm.model.unitig_0.63  | An12g10140        |
| evm.model.unitig_0.630 | An07g09120        |
| evm.model.unitig_0.631 | An07g09130        |
| evm.model.unitig_0.632 | An07g09140        |
| evm.model.unitig_0.633 | An07g09150        |
| evm.model.unitig_0.634 | An07g09160        |
| evm.model.unitig_0.635 | An07g09170        |
| evm.model.unitig_0.636 | An07g09180        |
| evm.model.unitig_0.637 | An07g09190        |
| evm.model.unitig_0.638 | An07g09200        |
| evm.model.unitig_0.639 | An07g09220        |
| evm.model.unitig_0.64  | An03g01460        |
| evm.model.unitig_0.640 | An07g09230        |
| evm.model.unitig_0.641 | An07g09240        |
| evm.model.unitig_0.642 | An07g09250        |
| evm.model.unitig_0.643 | An07g09260        |
| evm.model.unitig_0.644 | An07g09270        |
| evm.model.unitig_0.645 | -                 |
| evm.model.unitig_0.646 | An07g09280        |
| evm.model.unitig_0.647 | An07g09290        |
| evm.model.unitig_0.648 | An07g09320        |
| evm.model.unitig_0.649 | An07g09330        |

---

---

| Gene ID of H915-1      | Gene ID of 513.88 |
|------------------------|-------------------|
| evm.model.unitig_0.65  | An11g04940        |
| evm.model.unitig_0.650 | An07g09340        |
| evm.model.unitig_0.651 | An07g09350        |
| evm.model.unitig_0.652 | An07g09360        |
| evm.model.unitig_0.653 | An07g09370        |
| evm.model.unitig_0.654 | An07g09380        |
| evm.model.unitig_0.655 | An07g09390        |
| evm.model.unitig_0.656 | An07g09400        |
| evm.model.unitig_0.658 | An07g00320        |
| evm.model.unitig_0.66  | An07g00820        |
| evm.model.unitig_0.660 | An04g07430        |
| evm.model.unitig_0.661 | An04g07400        |
| evm.model.unitig_0.663 | An15g06750        |
| evm.model.unitig_0.664 | An07g09410        |
| evm.model.unitig_0.665 | An07g09430        |
| evm.model.unitig_0.666 | An07g09470        |
| evm.model.unitig_0.667 | An07g09530        |
| evm.model.unitig_0.668 | An07g09540        |
| evm.model.unitig_0.669 | An07g09550        |
| evm.model.unitig_0.67  | An07g00860        |
| evm.model.unitig_0.670 | An07g09560        |
| evm.model.unitig_0.671 | An07g09570        |
| evm.model.unitig_0.672 | An07g09580        |
| evm.model.unitig_0.673 | An07g09610        |
| evm.model.unitig_0.674 | An07g09630        |
| evm.model.unitig_0.676 | An07g09710        |
| evm.model.unitig_0.677 | An07g09720        |
| evm.model.unitig_0.678 | An07g09650        |
| evm.model.unitig_0.679 | An07g09680        |
| evm.model.unitig_0.68  | An07g00905        |
| evm.model.unitig_0.680 | An07g09690        |
| evm.model.unitig_0.681 | An07g09700        |
| evm.model.unitig_0.682 | An07g09730        |
| evm.model.unitig_0.683 | An07g09740        |
| evm.model.unitig_0.684 | An07g09750        |
| evm.model.unitig_0.685 | An07g09760        |
| evm.model.unitig_0.686 | An07g09770        |
| evm.model.unitig_0.687 | An07g09780        |
| evm.model.unitig_0.688 | An07g09780        |
| evm.model.unitig_0.689 | An11g07910        |
| evm.model.unitig_0.69  | An07g00930        |
| evm.model.unitig_0.690 | An04g08560        |
| evm.model.unitig_0.692 | An07g02100        |

---

---

| Gene ID of H915-1      | Gene ID of 513.88 |
|------------------------|-------------------|
| evm.model.unitig_0.693 | An18g00810        |
| evm.model.unitig_0.694 | An07g09790        |
| evm.model.unitig_0.695 | An07g09800        |
| evm.model.unitig_0.696 | An07g09810        |
| evm.model.unitig_0.697 | An07g09830        |
| evm.model.unitig_0.698 | An07g09840        |
| evm.model.unitig_0.699 | An07g09850        |
| evm.model.unitig_0.7   | An07g00020        |
| evm.model.unitig_0.70  | An07g00940        |
| evm.model.unitig_0.700 | An07g09860        |
| evm.model.unitig_0.701 | An07g09870        |
| evm.model.unitig_0.702 | An07g09880        |
| evm.model.unitig_0.703 | An07g09890        |
| evm.model.unitig_0.704 | An07g09900        |
| evm.model.unitig_0.705 | An07g09920        |
| evm.model.unitig_0.706 | An07g09950        |
| evm.model.unitig_0.707 | An07g09960        |
| evm.model.unitig_0.708 | An07g09970        |
| evm.model.unitig_0.709 | An07g09990        |
| evm.model.unitig_0.71  | An07g00950        |
| evm.model.unitig_0.710 | An07g10010        |
| evm.model.unitig_0.711 | An07g10020        |
| evm.model.unitig_0.712 | An07g10040        |
| evm.model.unitig_0.713 | An07g10050        |
| evm.model.unitig_0.714 | An07g10080        |
| evm.model.unitig_0.715 | An07g10090        |
| evm.model.unitig_0.716 | An07g10100        |
| evm.model.unitig_0.717 | An07g10110        |
| evm.model.unitig_0.718 | An07g10190        |
| evm.model.unitig_0.719 | An07g10200        |
| evm.model.unitig_0.72  | An07g00970        |
| evm.model.unitig_0.720 | An07g10210        |
| evm.model.unitig_0.721 | An07g10220        |
| evm.model.unitig_0.722 | An07g10230        |
| evm.model.unitig_0.723 | An07g10240        |
| evm.model.unitig_0.724 | An07g10250        |
| evm.model.unitig_0.725 | An07g10270        |
| evm.model.unitig_0.726 | An07g10280        |
| evm.model.unitig_0.727 | An07g10290        |
| evm.model.unitig_0.728 | An07g10310        |
| evm.model.unitig_0.729 | An07g10320        |
| evm.model.unitig_0.73  | An07g00980        |
| evm.model.unitig_0.730 | An07g10340        |

---

---

| Gene ID of H915-1      | Gene ID of 513.88 |
|------------------------|-------------------|
| evm.model.unitig_0.731 | An07g10350        |
| evm.model.unitig_0.732 | An07g10370        |
| evm.model.unitig_0.733 | An07g10400        |
| evm.model.unitig_0.734 | An07g10410        |
| evm.model.unitig_0.735 | An07g10420        |
| evm.model.unitig_0.736 | An07g10430        |
| evm.model.unitig_0.737 | An02g14990        |
| evm.model.unitig_0.738 | An02g14980        |
| evm.model.unitig_0.739 | An02g14970        |
| evm.model.unitig_0.74  | An07g01000        |
| evm.model.unitig_0.740 | An02g14950        |
| evm.model.unitig_0.741 | An02g14930        |
| evm.model.unitig_0.742 | An02g14920        |
| evm.model.unitig_0.743 | An02g14900        |
| evm.model.unitig_0.744 | An02g14890        |
| evm.model.unitig_0.745 | An02g14870        |
| evm.model.unitig_0.746 | An02g14860        |
| evm.model.unitig_0.747 | An02g14840        |
| evm.model.unitig_0.748 | An02g14830        |
| evm.model.unitig_0.749 | An02g14820        |
| evm.model.unitig_0.75  | An07g01010        |
| evm.model.unitig_0.750 | An02g14810        |
| evm.model.unitig_0.751 | An02g14800        |
| evm.model.unitig_0.752 | An02g14790        |
| evm.model.unitig_0.753 | An02g14770        |
| evm.model.unitig_0.754 | An02g14760        |
| evm.model.unitig_0.755 | An02g14750        |
| evm.model.unitig_0.756 | An02g14740        |
| evm.model.unitig_0.757 | An02g14730        |
| evm.model.unitig_0.758 | An02g14720        |
| evm.model.unitig_0.759 | An02g14710        |
| evm.model.unitig_0.76  | An07g01030        |
| evm.model.unitig_0.760 | An02g14690        |
| evm.model.unitig_0.761 | An02g14670        |
| evm.model.unitig_0.762 | An02g14660        |
| evm.model.unitig_0.763 | An02g14650        |
| evm.model.unitig_0.764 | An02g14630        |
| evm.model.unitig_0.765 | An02g14620        |
| evm.model.unitig_0.766 | An02g14610        |
| evm.model.unitig_0.767 | An02g14600        |
| evm.model.unitig_0.768 | An02g14590        |
| evm.model.unitig_0.769 | An02g14560        |
| evm.model.unitig_0.77  | An12g02670        |

---



---

| Gene ID of H915-1      | Gene ID of 513.88 |
|------------------------|-------------------|
| evm.model.unitig_0.770 | An02g14550        |
| evm.model.unitig_0.771 | An02g14540        |
| evm.model.unitig_0.772 | An02g14530        |
| evm.model.unitig_0.773 | An02g14520        |
| evm.model.unitig_0.774 | An02g14500        |
| evm.model.unitig_0.775 | An02g14490        |
| evm.model.unitig_0.776 | An02g14470        |
| evm.model.unitig_0.777 | An02g14460        |
| evm.model.unitig_0.778 | An02g14450        |
| evm.model.unitig_0.779 | An02g14410        |
| evm.model.unitig_0.78  | An07g01050        |
| evm.model.unitig_0.780 | An02g14400        |
| evm.model.unitig_0.781 | An02g14390        |
| evm.model.unitig_0.782 | An02g14380        |
| evm.model.unitig_0.783 | An02g14360        |
| evm.model.unitig_0.784 | An02g14350        |
| evm.model.unitig_0.785 | An02g14340        |
| evm.model.unitig_0.786 | An02g14330        |
| evm.model.unitig_0.787 | An02g14310        |
| evm.model.unitig_0.788 | An02g14300        |
| evm.model.unitig_0.789 | An02g14290        |
| evm.model.unitig_0.790 | An02g14280        |
| evm.model.unitig_0.791 | An02g14270        |
| evm.model.unitig_0.792 | An02g14240        |
| evm.model.unitig_0.794 | An02g14230        |
| evm.model.unitig_0.795 | An02g14220        |
| evm.model.unitig_0.796 | An02g14210        |
| evm.model.unitig_0.797 | An02g14190        |
| evm.model.unitig_0.798 | An02g14170        |
| evm.model.unitig_0.799 | An02g14160        |
| evm.model.unitig_0.8   | An07g00030        |
| evm.model.unitig_0.80  | An07g01090        |
| evm.model.unitig_0.800 | -                 |
| evm.model.unitig_0.801 | -                 |
| evm.model.unitig_0.802 | An02g14110        |
| evm.model.unitig_0.803 | An02g14100        |
| evm.model.unitig_0.804 | An02g14080        |
| evm.model.unitig_0.805 | An02g14070        |
| evm.model.unitig_0.806 | An02g14010        |
| evm.model.unitig_0.807 | An02g13980        |
| evm.model.unitig_0.808 | An02g13970        |
| evm.model.unitig_0.809 | An02g13940        |
| evm.model.unitig_0.81  | An07g01110        |

---

---

| Gene ID of H915-1      | Gene ID of 513.88 |
|------------------------|-------------------|
| evm.model.unitig_0.811 | An02g13920        |
| evm.model.unitig_0.812 | An02g13910        |
| evm.model.unitig_0.813 | -                 |
| evm.model.unitig_0.814 | An02g13900        |
| evm.model.unitig_0.815 | An02g13890        |
| evm.model.unitig_0.816 | An02g13880        |
| evm.model.unitig_0.817 | An02g13870        |
| evm.model.unitig_0.818 | An02g13860        |
| evm.model.unitig_0.819 | An02g13850        |
| evm.model.unitig_0.820 | An02g13840        |
| evm.model.unitig_0.821 | An02g13830        |
| evm.model.unitig_0.822 | An02g13820        |
| evm.model.unitig_0.823 | An02g13810        |
| evm.model.unitig_0.824 | An02g13800        |
| evm.model.unitig_0.825 | An02g13790        |
| evm.model.unitig_0.826 | -                 |
| evm.model.unitig_0.827 | An02g13770        |
| evm.model.unitig_0.828 | An02g13750        |
| evm.model.unitig_0.829 | An02g13740        |
| evm.model.unitig_0.83  | An07g01160        |
| evm.model.unitig_0.830 | An02g13710        |
| evm.model.unitig_0.831 | An02g13700        |
| evm.model.unitig_0.832 | An02g13680        |
| evm.model.unitig_0.833 | An02g13670        |
| evm.model.unitig_0.835 | An02g13650        |
| evm.model.unitig_0.836 | An02g13640        |
| evm.model.unitig_0.837 | An02g13630        |
| evm.model.unitig_0.838 | An02g13620        |
| evm.model.unitig_0.839 | An02g13600        |
| evm.model.unitig_0.840 | An02g13590        |
| evm.model.unitig_0.841 | An02g13580        |
| evm.model.unitig_0.842 | An02g13570        |
| evm.model.unitig_0.843 | An02g13560        |
| evm.model.unitig_0.844 | An02g13550        |
| evm.model.unitig_0.845 | An02g13540        |
| evm.model.unitig_0.846 | An02g13530        |
| evm.model.unitig_0.847 | An02g13520        |
| evm.model.unitig_0.848 | An02g13510        |
| evm.model.unitig_0.849 | An02g13500        |
| evm.model.unitig_0.85  | An07g01200        |
| evm.model.unitig_0.850 | An02g13490        |
| evm.model.unitig_0.851 | An02g13480        |
| evm.model.unitig_0.852 | An02g13470        |

---

---

| Gene ID of H915-1      | Gene ID of 513.88 |
|------------------------|-------------------|
| evm.model.unitig_0.853 | An02g13460        |
| evm.model.unitig_0.855 | An02g13450        |
| evm.model.unitig_0.856 | An02g13440        |
| evm.model.unitig_0.857 | An02g13430        |
| evm.model.unitig_0.858 | An02g13420        |
| evm.model.unitig_0.859 | An02g13410        |
| evm.model.unitig_0.86  | An07g01220        |
| evm.model.unitig_0.860 | An02g13400        |
| evm.model.unitig_0.861 | An02g13390        |
| evm.model.unitig_0.862 | An02g13380        |
| evm.model.unitig_0.863 | An02g13370        |
| evm.model.unitig_0.864 | An02g13360        |
| evm.model.unitig_0.865 | An02g13350        |
| evm.model.unitig_0.866 | An02g13340        |
| evm.model.unitig_0.867 | An02g13330        |
| evm.model.unitig_0.868 | An02g13320        |
| evm.model.unitig_0.869 | An02g13310        |
| evm.model.unitig_0.87  | An17g01560        |
| evm.model.unitig_0.870 | An02g13310        |
| evm.model.unitig_0.871 | An02g13300        |
| evm.model.unitig_0.872 | An02g13290        |
| evm.model.unitig_0.873 | An02g13280        |
| evm.model.unitig_0.874 | An02g13270        |
| evm.model.unitig_0.875 | An02g13260        |
| evm.model.unitig_0.876 | An02g13250        |
| evm.model.unitig_0.877 | An02g13240        |
| evm.model.unitig_0.879 | An02g13220        |
| evm.model.unitig_0.88  | An07g01250        |
| evm.model.unitig_0.880 | -                 |
| evm.model.unitig_0.881 | An02g13210        |
| evm.model.unitig_0.882 | -                 |
| evm.model.unitig_0.883 | An02g13190        |
| evm.model.unitig_0.884 | An02g13180        |
| evm.model.unitig_0.885 | An02g13160        |
| evm.model.unitig_0.886 | An02g13150        |
| evm.model.unitig_0.887 | An02g13140        |
| evm.model.unitig_0.888 | An02g13130        |
| evm.model.unitig_0.889 | An02g13120        |
| evm.model.unitig_0.89  | An07g01260        |
| evm.model.unitig_0.890 | An02g13100        |
| evm.model.unitig_0.891 | An02g13090        |
| evm.model.unitig_0.892 | An02g13050        |
| evm.model.unitig_0.893 | An02g13040        |

---

---

| Gene ID of H915-1      | Gene ID of 513.88 |
|------------------------|-------------------|
| evm.model.unitig_0.897 | An02g12980        |
| evm.model.unitig_0.898 | An02g12970        |
| evm.model.unitig_0.899 | An11g08370        |
| evm.model.unitig_0.9   | An07g00040        |
| evm.model.unitig_0.90  | An07g01270        |
| evm.model.unitig_0.900 | An02g12940        |
| evm.model.unitig_0.901 | An02g12930        |
| evm.model.unitig_0.902 | An02g12920        |
| evm.model.unitig_0.903 | An02g12900        |
| evm.model.unitig_0.904 | An02g12850        |
| evm.model.unitig_0.906 | An02g12830        |
| evm.model.unitig_0.907 | An02g12820        |
| evm.model.unitig_0.908 | An02g12810        |
| evm.model.unitig_0.909 | An02g12800        |
| evm.model.unitig_0.91  | An07g01280        |
| evm.model.unitig_0.910 | An02g12790        |
| evm.model.unitig_0.912 | An02g12770        |
| evm.model.unitig_0.913 | An02g12760        |
| evm.model.unitig_0.914 | An02g12750        |
| evm.model.unitig_0.915 | An02g12680        |
| evm.model.unitig_0.916 | An02g12670        |
| evm.model.unitig_0.917 | An02g12650        |
| evm.model.unitig_0.918 | An02g12640        |
| evm.model.unitig_0.919 | An02g12630        |
| evm.model.unitig_0.92  | An07g01290        |
| evm.model.unitig_0.920 | An02g12610        |
| evm.model.unitig_0.921 | An02g12600        |
| evm.model.unitig_0.922 | An02g12510        |
| evm.model.unitig_0.923 | An02g12505        |
| evm.model.unitig_0.924 | -                 |
| evm.model.unitig_0.925 | An02g12503        |
| evm.model.unitig_0.927 | An02g12500        |
| evm.model.unitig_0.928 | An02g12490        |
| evm.model.unitig_0.929 | An02g12480        |
| evm.model.unitig_0.93  | An07g01310        |
| evm.model.unitig_0.930 | An02g12470        |
| evm.model.unitig_0.931 | An02g12460        |
| evm.model.unitig_0.932 | An02g12450        |
| evm.model.unitig_0.934 | -                 |
| evm.model.unitig_0.935 | An02g12430        |
| evm.model.unitig_0.936 | An02g12420        |
| evm.model.unitig_0.937 | An02g12390        |
| evm.model.unitig_0.938 | An02g12370        |

---

---

| Gene ID of H915-1      | Gene ID of 513.88 |
|------------------------|-------------------|
| evm.model.unitig_0.939 | An02g12360        |
| evm.model.unitig_0.94  | An07g01340        |
| evm.model.unitig_0.940 | An02g12350        |
| evm.model.unitig_0.942 | An02g12320        |
| evm.model.unitig_0.943 | An02g12310        |
| evm.model.unitig_0.944 | An02g12260        |
| evm.model.unitig_0.945 | An02g12210        |
| evm.model.unitig_0.946 | An02g12160        |
| evm.model.unitig_0.947 | An02g12140        |
| evm.model.unitig_0.95  | An07g01350        |
| evm.model.unitig_0.950 | An02g12080        |
| evm.model.unitig_0.951 | An02g12070        |
| evm.model.unitig_0.952 | An02g12050        |
| evm.model.unitig_0.953 | An02g12040        |
| evm.model.unitig_0.954 | An02g12030        |
| evm.model.unitig_0.955 | An02g12000        |
| evm.model.unitig_0.956 | An02g11990        |
| evm.model.unitig_0.957 | An02g11980        |
| evm.model.unitig_0.958 | -                 |
| evm.model.unitig_0.959 | An02g11950        |
| evm.model.unitig_0.96  | An07g01360        |
| evm.model.unitig_0.960 | An02g11940        |
| evm.model.unitig_0.961 | An02g11920        |
| evm.model.unitig_0.962 | An02g11910        |
| evm.model.unitig_0.963 | -                 |
| evm.model.unitig_0.964 | An02g11900        |
| evm.model.unitig_0.965 | An02g11890        |
| evm.model.unitig_0.966 | An02g11860        |
| evm.model.unitig_0.967 | An12g06430        |
| evm.model.unitig_0.968 | An02g11830        |
| evm.model.unitig_0.969 | An02g11810        |
| evm.model.unitig_0.97  | An07g01380        |
| evm.model.unitig_0.970 | An02g11800        |
| evm.model.unitig_0.971 | An02g11790        |
| evm.model.unitig_0.972 | An02g11760        |
| evm.model.unitig_0.973 | An02g11750        |
| evm.model.unitig_0.974 | An02g11720        |
| evm.model.unitig_0.976 | An02g11700        |
| evm.model.unitig_0.977 | An02g11690        |
| evm.model.unitig_0.978 | An02g11680        |
| evm.model.unitig_0.979 | An02g11670        |
| evm.model.unitig_0.98  | An07g01390        |
| evm.model.unitig_0.980 | An02g11660        |

---

---

| Gene ID of H915-1       | Gene ID of 513.88 |
|-------------------------|-------------------|
| evm.model.unitig_0.981  | An02g11650        |
| evm.model.unitig_0.982  | An02g11630        |
| evm.model.unitig_0.983  | An02g11625        |
| evm.model.unitig_0.984  | An02g11590        |
| evm.model.unitig_0.985  | -                 |
| evm.model.unitig_0.986  | An02g11560        |
| evm.model.unitig_0.987  | An02g11550        |
| evm.model.unitig_0.988  | An02g11530        |
| evm.model.unitig_0.989  | An02g11500        |
| evm.model.unitig_0.99   | An07g01400        |
| evm.model.unitig_0.990  | An02g11480        |
| evm.model.unitig_0.991  | An02g11470        |
| evm.model.unitig_0.992  | An02g11460        |
| evm.model.unitig_0.993  | An02g11450        |
| evm.model.unitig_0.994  | An02g11440        |
| evm.model.unitig_0.996  | An02g11420        |
| evm.model.unitig_0.997  | An02g11400        |
| evm.model.unitig_0.998  | An02g11390        |
| evm.model.unitig_0.999  | An02g11360        |
| evm.model.unitig_1.1    | An15g05100        |
| evm.model.unitig_1.10   | An18g00100        |
| evm.model.unitig_1.100  | An18g01890        |
| evm.model.unitig_1.1000 | An08g07320        |
| evm.model.unitig_1.1001 | An08g07330        |
| evm.model.unitig_1.1002 | An08g07340        |
| evm.model.unitig_1.1003 | An08g07350        |
| evm.model.unitig_1.1004 | An08g07360        |
| evm.model.unitig_1.1005 | An08g07370        |
| evm.model.unitig_1.1006 | An08g07380        |
| evm.model.unitig_1.1007 | An08g07400        |
| evm.model.unitig_1.1008 | An08g07420        |
| evm.model.unitig_1.1009 | An08g07430        |
| evm.model.unitig_1.101  | An12g05650        |
| evm.model.unitig_1.1010 | An08g07440        |
| evm.model.unitig_1.1011 | An08g07460        |
| evm.model.unitig_1.1012 | An08g07465        |
| evm.model.unitig_1.1013 | An08g07480        |
| evm.model.unitig_1.1014 | An08g07490        |
| evm.model.unitig_1.1015 | An08g07510        |
| evm.model.unitig_1.1016 | An08g07520        |
| evm.model.unitig_1.1017 | An08g07530        |
| evm.model.unitig_1.1018 | An08g07540        |
| evm.model.unitig_1.1019 | An08g07550        |

---

---

| Gene ID of H915-1       | Gene ID of 513.88 |
|-------------------------|-------------------|
| evm.model.unitig_1.102  | An18g01930        |
| evm.model.unitig_1.1020 | An08g07560        |
| evm.model.unitig_1.1021 | An08g07570        |
| evm.model.unitig_1.1022 | An08g07580        |
| evm.model.unitig_1.1023 | An08g07590        |
| evm.model.unitig_1.1024 | An08g07600        |
| evm.model.unitig_1.1025 | An08g07610        |
| evm.model.unitig_1.1026 | An06g02010        |
| evm.model.unitig_1.1027 | An08g07630        |
| evm.model.unitig_1.1028 | An08g07710        |
| evm.model.unitig_1.1029 | An08g07740        |
| evm.model.unitig_1.103  | An18g01950        |
| evm.model.unitig_1.1030 | An08g07770        |
| evm.model.unitig_1.1031 | An08g07780        |
| evm.model.unitig_1.1032 | An08g07790        |
| evm.model.unitig_1.1033 | An08g07800        |
| evm.model.unitig_1.1034 | An08g07810        |
| evm.model.unitig_1.1035 | An08g07820        |
| evm.model.unitig_1.1036 | An08g07820        |
| evm.model.unitig_1.1037 | An08g07830        |
| evm.model.unitig_1.1038 | An08g07840        |
| evm.model.unitig_1.1039 | An08g07870        |
| evm.model.unitig_1.104  | An18g01960        |
| evm.model.unitig_1.1040 | An08g07890        |
| evm.model.unitig_1.1041 | An08g07900        |
| evm.model.unitig_1.1042 | An08g07920        |
| evm.model.unitig_1.1043 | An08g07930        |
| evm.model.unitig_1.1044 | An08g07940        |
| evm.model.unitig_1.1045 | An08g07950        |
| evm.model.unitig_1.1046 | An08g07960        |
| evm.model.unitig_1.1047 | An08g08000        |
| evm.model.unitig_1.1048 | An08g08010        |
| evm.model.unitig_1.1049 | An08g08020        |
| evm.model.unitig_1.105  | An18g01970        |
| evm.model.unitig_1.1050 | An08g08030        |
| evm.model.unitig_1.1051 | An08g08040        |
| evm.model.unitig_1.1052 | An08g08060        |
| evm.model.unitig_1.1053 | An08g08070        |
| evm.model.unitig_1.1054 | An08g08080        |
| evm.model.unitig_1.1055 | An08g08100        |
| evm.model.unitig_1.1057 | An08g08120        |
| evm.model.unitig_1.1058 | An08g08130        |
| evm.model.unitig_1.1059 | An08g08140        |

---

---

| Gene ID of H915-1       | Gene ID of 513.88 |
|-------------------------|-------------------|
| evm.model.unitig_1.106  | An18g01980        |
| evm.model.unitig_1.1060 | An08g08150        |
| evm.model.unitig_1.1061 | An08g08220        |
| evm.model.unitig_1.1062 | An08g08230        |
| evm.model.unitig_1.1063 | An08g08240        |
| evm.model.unitig_1.1064 | An08g08250        |
| evm.model.unitig_1.1065 | An08g08260        |
| evm.model.unitig_1.1066 | An08g08280        |
| evm.model.unitig_1.1067 | An08g08290        |
| evm.model.unitig_1.1068 | An08g08300        |
| evm.model.unitig_1.1069 | An08g08310        |
| evm.model.unitig_1.107  | An18g01990        |
| evm.model.unitig_1.1070 | An08g08320        |
| evm.model.unitig_1.1071 | An08g08330        |
| evm.model.unitig_1.1072 | An08g08340        |
| evm.model.unitig_1.1073 | An01g11250        |
| evm.model.unitig_1.1075 | An08g08370        |
| evm.model.unitig_1.1076 | An08g08380        |
| evm.model.unitig_1.1077 | An02g10090        |
| evm.model.unitig_1.1078 | An08g08400        |
| evm.model.unitig_1.1079 | An08g08410        |
| evm.model.unitig_1.108  | An18g02000        |
| evm.model.unitig_1.1080 | An08g08430        |
| evm.model.unitig_1.1081 | An08g08450        |
| evm.model.unitig_1.1083 | An08g08470        |
| evm.model.unitig_1.1084 | An08g08480        |
| evm.model.unitig_1.1085 | An08g08480        |
| evm.model.unitig_1.1086 | An08g08490        |
| evm.model.unitig_1.1087 | An08g08500        |
| evm.model.unitig_1.1088 | An08g08510        |
| evm.model.unitig_1.1089 | An08g08530        |
| evm.model.unitig_1.109  | An18g02010        |
| evm.model.unitig_1.1090 | An08g08540        |
| evm.model.unitig_1.1091 | An08g08550        |
| evm.model.unitig_1.1092 | An08g08560        |
| evm.model.unitig_1.1093 | An08g08570        |
| evm.model.unitig_1.1094 | An08g08590        |
| evm.model.unitig_1.1095 | An08g08600        |
| evm.model.unitig_1.1096 | An08g08620        |
| evm.model.unitig_1.1097 | An08g08660        |
| evm.model.unitig_1.1098 | An08g08670        |
| evm.model.unitig_1.11   | An18g00110        |
| evm.model.unitig_1.110  | An18g02020        |

---



---

| Gene ID of H915-1       | Gene ID of 513.88 |
|-------------------------|-------------------|
| evm.model.unitig_1.1100 | An08g08690        |
| evm.model.unitig_1.1102 | An08g08710        |
| evm.model.unitig_1.1103 | An08g08720        |
| evm.model.unitig_1.1104 | An08g08730        |
| evm.model.unitig_1.1105 | An08g08740        |
| evm.model.unitig_1.1106 | An08g08750        |
| evm.model.unitig_1.1107 | An08g08760        |
| evm.model.unitig_1.1108 | An08g08770        |
| evm.model.unitig_1.1109 | An08g08820        |
| evm.model.unitig_1.111  | An18g02050        |
| evm.model.unitig_1.1110 | An08g08840        |
| evm.model.unitig_1.1111 | An08g08850        |
| evm.model.unitig_1.1112 | An08g08860        |
| evm.model.unitig_1.1113 | An08g08870        |
| evm.model.unitig_1.1114 | An08g08890        |
| evm.model.unitig_1.1115 | An08g08910        |
| evm.model.unitig_1.1116 | An08g08920        |
| evm.model.unitig_1.1117 | An08g08930        |
| evm.model.unitig_1.1118 | An08g08940        |
| evm.model.unitig_1.1119 | An08g08950        |
| evm.model.unitig_1.112  | An18g02060        |
| evm.model.unitig_1.1120 | An08g08980        |
| evm.model.unitig_1.1121 | An08g09000        |
| evm.model.unitig_1.1122 | An08g09010        |
| evm.model.unitig_1.1123 | An08g09020        |
| evm.model.unitig_1.1124 | An08g09030        |
| evm.model.unitig_1.1125 | An08g09040        |
| evm.model.unitig_1.1127 | An08g09120        |
| evm.model.unitig_1.1128 | An08g09140        |
| evm.model.unitig_1.1129 | An08g09150        |
| evm.model.unitig_1.113  | An18g02090        |
| evm.model.unitig_1.1130 | An08g09160        |
| evm.model.unitig_1.1131 | An08g09170        |
| evm.model.unitig_1.1132 | An08g09180        |
| evm.model.unitig_1.1133 | An08g09190        |
| evm.model.unitig_1.1134 | An09g00520        |
| evm.model.unitig_1.1135 | An08g09230        |
| evm.model.unitig_1.1136 | An08g09240        |
| evm.model.unitig_1.1137 | An08g09250        |
| evm.model.unitig_1.1138 | An08g09260        |
| evm.model.unitig_1.114  | An18g02110        |
| evm.model.unitig_1.1140 | An08g09280        |
| evm.model.unitig_1.1141 | An15g00280        |

---

---

| Gene ID of H915-1       | Gene ID of 513.88 |
|-------------------------|-------------------|
| evm.model.unitig_1.1142 | An08g09310        |
| evm.model.unitig_1.1143 | An08g09310        |
| evm.model.unitig_1.1144 | An08g09320        |
| evm.model.unitig_1.1145 | An08g09330        |
| evm.model.unitig_1.1146 | An08g09340        |
| evm.model.unitig_1.1147 | An08g09350        |
| evm.model.unitig_1.1148 | An08g09360        |
| evm.model.unitig_1.1149 | An08g09370        |
| evm.model.unitig_1.115  | An18g02130        |
| evm.model.unitig_1.1150 | An08g09390        |
| evm.model.unitig_1.1151 | An01g00700        |
| evm.model.unitig_1.1152 | An08g09420        |
| evm.model.unitig_1.1153 | An16g03130        |
| evm.model.unitig_1.1154 | An08g09460        |
| evm.model.unitig_1.1155 | An08g09470        |
| evm.model.unitig_1.1156 | An08g09490        |
| evm.model.unitig_1.1157 | An03g03030        |
| evm.model.unitig_1.1159 | An08g11190        |
| evm.model.unitig_1.116  | An18g02140        |
| evm.model.unitig_1.1161 | An08g09550        |
| evm.model.unitig_1.1163 | An08g09580        |
| evm.model.unitig_1.1164 | An08g09610        |
| evm.model.unitig_1.1165 | An08g09630        |
| evm.model.unitig_1.1166 | An08g09690        |
| evm.model.unitig_1.1167 | An08g09700        |
| evm.model.unitig_1.1169 | An08g09750        |
| evm.model.unitig_1.117  | An18g02150        |
| evm.model.unitig_1.1170 | An08g09760        |
| evm.model.unitig_1.1171 | An08g09780        |
| evm.model.unitig_1.1172 | An08g09800        |
| evm.model.unitig_1.1173 | An08g09810        |
| evm.model.unitig_1.1174 | An08g09850        |
| evm.model.unitig_1.1175 | An09g01430        |
| evm.model.unitig_1.1176 | An08g09870        |
| evm.model.unitig_1.1178 | An08g09940        |
| evm.model.unitig_1.1179 | An08g09970        |
| evm.model.unitig_1.118  | An18g02170        |
| evm.model.unitig_1.1180 | An08g09980        |
| evm.model.unitig_1.1181 | An12g00100        |
| evm.model.unitig_1.1182 | An08g10000        |
| evm.model.unitig_1.1183 | An08g10010        |
| evm.model.unitig_1.1184 | An08g10020        |
| evm.model.unitig_1.1185 | An08g10030        |

---

---

| Gene ID of H915-1       | Gene ID of 513.88 |
|-------------------------|-------------------|
| evm.model.unitig_1.1186 | An08g10040        |
| evm.model.unitig_1.1187 | An08g10050        |
| evm.model.unitig_1.1188 | An08g10060        |
| evm.model.unitig_1.1189 | An08g10070        |
| evm.model.unitig_1.119  | An18g02190        |
| evm.model.unitig_1.1190 | An08g10100        |
| evm.model.unitig_1.1191 | An08g10110        |
| evm.model.unitig_1.1192 | An08g10130        |
| evm.model.unitig_1.1193 | An08g10140        |
| evm.model.unitig_1.1194 | An08g10150        |
| evm.model.unitig_1.1197 | An08g10170        |
| evm.model.unitig_1.1198 | An08g10180        |
| evm.model.unitig_1.1199 | An08g10190        |
| evm.model.unitig_1.12   | An18g00120        |
| evm.model.unitig_1.120  | An18g02200        |
| evm.model.unitig_1.1200 | An08g10210        |
| evm.model.unitig_1.1201 | An08g10260        |
| evm.model.unitig_1.1202 | An08g10270        |
| evm.model.unitig_1.1203 | An08g10280        |
| evm.model.unitig_1.1204 | An08g10300        |
| evm.model.unitig_1.1205 | An08g10310        |
| evm.model.unitig_1.1206 | An08g10320        |
| evm.model.unitig_1.1207 | An08g10330        |
| evm.model.unitig_1.1208 | An08g10340        |
| evm.model.unitig_1.1209 | An08g10350        |
| evm.model.unitig_1.121  | An18g02210        |
| evm.model.unitig_1.1210 | An08g10360        |
| evm.model.unitig_1.1211 | -                 |
| evm.model.unitig_1.1212 | An08g10370        |
| evm.model.unitig_1.1213 | An08g10380        |
| evm.model.unitig_1.1214 | An08g10390        |
| evm.model.unitig_1.1215 | An08g10390        |
| evm.model.unitig_1.1216 | An08g10400        |
| evm.model.unitig_1.1217 | An08g10410        |
| evm.model.unitig_1.1218 | An08g10440        |
| evm.model.unitig_1.1219 | An08g10450        |
| evm.model.unitig_1.122  | An18g02220        |
| evm.model.unitig_1.1220 | An08g10460        |
| evm.model.unitig_1.1221 | An08g10480        |
| evm.model.unitig_1.1222 | An08g10490        |
| evm.model.unitig_1.1223 | An08g10500        |
| evm.model.unitig_1.1224 | An08g10510        |
| evm.model.unitig_1.1225 | An08g10520        |

---

---

| Gene ID of H915-1       | Gene ID of 513.88 |
|-------------------------|-------------------|
| evm.model.unitig_1.1226 | An08g10530        |
| evm.model.unitig_1.1227 | An08g10550        |
| evm.model.unitig_1.1228 | An08g10560        |
| evm.model.unitig_1.1229 | An08g10570        |
| evm.model.unitig_1.123  | An18g02230        |
| evm.model.unitig_1.1230 | An08g10600        |
| evm.model.unitig_1.1231 | An08g10610        |
| evm.model.unitig_1.1232 | -                 |
| evm.model.unitig_1.1233 | An08g10640        |
| evm.model.unitig_1.1234 | An08g10650        |
| evm.model.unitig_1.1235 | An08g10670        |
| evm.model.unitig_1.1236 | An08g10680        |
| evm.model.unitig_1.1237 | An08g10690        |
| evm.model.unitig_1.1238 | An08g10700        |
| evm.model.unitig_1.1239 | An08g10710        |
| evm.model.unitig_1.124  | An18g02240        |
| evm.model.unitig_1.1240 | An08g10720        |
| evm.model.unitig_1.1241 | An08g10740        |
| evm.model.unitig_1.1242 | An08g10750        |
| evm.model.unitig_1.1243 | An06g01920        |
| evm.model.unitig_1.1244 | An06g01910        |
| evm.model.unitig_1.1245 | An06g01900        |
| evm.model.unitig_1.1246 | An06g01890        |
| evm.model.unitig_1.1247 | An06g01880        |
| evm.model.unitig_1.1248 | An06g01870        |
| evm.model.unitig_1.1249 | An06g01860        |
| evm.model.unitig_1.125  | An18g02250        |
| evm.model.unitig_1.1250 | An06g01850        |
| evm.model.unitig_1.1251 | An06g01840        |
| evm.model.unitig_1.1252 | An06g01830        |
| evm.model.unitig_1.1253 | An06g01820        |
| evm.model.unitig_1.1254 | An06g01810        |
| evm.model.unitig_1.1255 | An06g01780        |
| evm.model.unitig_1.1256 | An06g01770        |
| evm.model.unitig_1.1257 | An06g01760        |
| evm.model.unitig_1.1258 | An06g01750        |
| evm.model.unitig_1.1259 | An06g01740        |
| evm.model.unitig_1.126  | An18g02270        |
| evm.model.unitig_1.1260 | An06g01730        |
| evm.model.unitig_1.1261 | An06g01710        |
| evm.model.unitig_1.1262 | An06g01660        |
| evm.model.unitig_1.1263 | An06g01650        |
| evm.model.unitig_1.1264 | An06g01640        |

---

---

| Gene ID of H915-1       | Gene ID of 513.88 |
|-------------------------|-------------------|
| evm.model.unitig_1.1265 | An06g01630        |
| evm.model.unitig_1.1266 | An06g01620        |
| evm.model.unitig_1.1267 | An06g01600        |
| evm.model.unitig_1.1268 | An06g01590        |
| evm.model.unitig_1.1269 | An06g01580        |
| evm.model.unitig_1.127  | An18g02280        |
| evm.model.unitig_1.1270 | An06g01550        |
| evm.model.unitig_1.1271 | An06g01540        |
| evm.model.unitig_1.1272 | An06g01530        |
| evm.model.unitig_1.1273 | An06g01520        |
| evm.model.unitig_1.1274 | An06g01510        |
| evm.model.unitig_1.1275 | An06g01500        |
| evm.model.unitig_1.1276 | An06g01490        |
| evm.model.unitig_1.1277 | An06g01480        |
| evm.model.unitig_1.1278 | An06g01470        |
| evm.model.unitig_1.1279 | An06g01460        |
| evm.model.unitig_1.128  | An18g02305        |
| evm.model.unitig_1.1280 | An06g01440        |
| evm.model.unitig_1.1281 | An06g01430        |
| evm.model.unitig_1.1282 | An06g01400        |
| evm.model.unitig_1.1283 | An06g01390        |
| evm.model.unitig_1.1284 | An06g01380        |
| evm.model.unitig_1.1285 | An06g01370        |
| evm.model.unitig_1.1286 | -                 |
| evm.model.unitig_1.1287 | An06g01360        |
| evm.model.unitig_1.1288 | An06g01350        |
| evm.model.unitig_1.1289 | An06g01320        |
| evm.model.unitig_1.129  | An18g02330        |
| evm.model.unitig_1.1290 | An06g01300        |
| evm.model.unitig_1.1291 | An06g01290        |
| evm.model.unitig_1.1292 | An06g01270        |
| evm.model.unitig_1.1293 | An06g01260        |
| evm.model.unitig_1.1294 | An06g01220        |
| evm.model.unitig_1.1295 | An06g01210        |
| evm.model.unitig_1.1296 | An06g01200        |
| evm.model.unitig_1.1297 | An06g01190        |
| evm.model.unitig_1.1298 | An06g01180        |
| evm.model.unitig_1.1299 | An06g01170        |
| evm.model.unitig_1.13   | An18g00170        |
| evm.model.unitig_1.130  | An18g02350        |
| evm.model.unitig_1.1300 | An06g01160        |
| evm.model.unitig_1.1301 | An06g01140        |
| evm.model.unitig_1.1302 | An06g01130        |

---

---

| Gene ID of H915-1       | Gene ID of 513.88 |
|-------------------------|-------------------|
| evm.model.unitig_1.1303 | An06g01120        |
| evm.model.unitig_1.1304 | An06g01110        |
| evm.model.unitig_1.1305 | An06g01100        |
| evm.model.unitig_1.1306 | An06g01080        |
| evm.model.unitig_1.1307 | An06g01070        |
| evm.model.unitig_1.1308 | An06g01060        |
| evm.model.unitig_1.1309 | An06g01050        |
| evm.model.unitig_1.131  | -                 |
| evm.model.unitig_1.1310 | An06g01040        |
| evm.model.unitig_1.1311 | An06g01030        |
| evm.model.unitig_1.1312 | An06g01020        |
| evm.model.unitig_1.1313 | -                 |
| evm.model.unitig_1.1314 | An06g01000        |
| evm.model.unitig_1.1315 | An06g00990        |
| evm.model.unitig_1.1316 | An06g00970        |
| evm.model.unitig_1.1317 | An01g12480        |
| evm.model.unitig_1.1318 | An06g00950        |
| evm.model.unitig_1.1319 | An06g00940        |
| evm.model.unitig_1.132  | An18g02360        |
| evm.model.unitig_1.1320 | An06g00930        |
| evm.model.unitig_1.1321 | An06g00920        |
| evm.model.unitig_1.1322 | An06g00900        |
| evm.model.unitig_1.1323 | -                 |
| evm.model.unitig_1.1324 | An06g00890        |
| evm.model.unitig_1.1325 | An06g00860        |
| evm.model.unitig_1.1326 | An06g00850        |
| evm.model.unitig_1.1327 | An06g00840        |
| evm.model.unitig_1.1328 | An06g00830        |
| evm.model.unitig_1.1329 | An06g00820        |
| evm.model.unitig_1.133  | An18g02370        |
| evm.model.unitig_1.1330 | An06g00810        |
| evm.model.unitig_1.1332 | An08g07440        |
| evm.model.unitig_1.1333 | An06g00770        |
| evm.model.unitig_1.1334 | An06g00740        |
| evm.model.unitig_1.1335 | An04g02690        |
| evm.model.unitig_1.1336 | An06g00750        |
| evm.model.unitig_1.1337 | An12g08620        |
| evm.model.unitig_1.1338 | An06g00760        |
| evm.model.unitig_1.1339 | An14g07040        |
| evm.model.unitig_1.134  | An18g02380        |
| evm.model.unitig_1.1340 | An06g00720        |
| evm.model.unitig_1.1341 | -                 |
| evm.model.unitig_1.1342 | An05g00630        |

---

---

| Gene ID of H915-1       | Gene ID of 513.88 |
|-------------------------|-------------------|
| evm.model.unitig_1.1343 | An06g00670        |
| evm.model.unitig_1.1344 | An06g00660        |
| evm.model.unitig_1.1345 | An06g00640        |
| evm.model.unitig_1.1346 | An06g00630        |
| evm.model.unitig_1.1347 | An06g00620        |
| evm.model.unitig_1.1348 | An06g00610        |
| evm.model.unitig_1.1349 | An06g00590        |
| evm.model.unitig_1.135  | An18g02400        |
| evm.model.unitig_1.1350 | An06g00580        |
| evm.model.unitig_1.1351 | An08g12110        |
| evm.model.unitig_1.1352 | An06g00560        |
| evm.model.unitig_1.1355 | An06g00490        |
| evm.model.unitig_1.1356 | An08g06440        |
| evm.model.unitig_1.1357 | An06g00460        |
| evm.model.unitig_1.1358 | An06g00430        |
| evm.model.unitig_1.1359 | An04g04750        |
| evm.model.unitig_1.136  | An18g02410        |
| evm.model.unitig_1.1360 | An06g00380        |
| evm.model.unitig_1.1362 | An06g00370        |
| evm.model.unitig_1.1363 | An06g00360        |
| evm.model.unitig_1.1364 | An06g00350        |
| evm.model.unitig_1.1366 | An06g00340        |
| evm.model.unitig_1.1367 | An06g00330        |
| evm.model.unitig_1.1368 | An06g00310        |
| evm.model.unitig_1.1369 | An06g00300        |
| evm.model.unitig_1.137  | An18g02440        |
| evm.model.unitig_1.1370 | An06g00290        |
| evm.model.unitig_1.1371 | An06g00280        |
| evm.model.unitig_1.1372 | An04g09900        |
| evm.model.unitig_1.1373 | An06g00270        |
| evm.model.unitig_1.1374 | An06g00260        |
| evm.model.unitig_1.1375 | An06g00210        |
| evm.model.unitig_1.1376 | An06g00190        |
| evm.model.unitig_1.1377 | An06g00170        |
| evm.model.unitig_1.1378 | An06g00160        |
| evm.model.unitig_1.1379 | An06g00150        |
| evm.model.unitig_1.138  | An18g02460        |
| evm.model.unitig_1.1380 | An06g00150        |
| evm.model.unitig_1.1381 | An06g00120        |
| evm.model.unitig_1.1384 | An17g00380        |
| evm.model.unitig_1.1385 | An08g11160        |
| evm.model.unitig_1.1386 | An08g11120        |
| evm.model.unitig_1.1387 | An08g11070        |

---

---

| Gene ID of H915-1       | Gene ID of 513.88 |
|-------------------------|-------------------|
| evm.model.unitig_1.1388 | An08g11060        |
| evm.model.unitig_1.1389 | An08g11040        |
| evm.model.unitig_1.139  | An18g02470        |
| evm.model.unitig_1.1390 | An08g11030        |
| evm.model.unitig_1.1391 | An08g11010        |
| evm.model.unitig_1.1392 | An08g10990        |
| evm.model.unitig_1.1393 | An08g10980        |
| evm.model.unitig_1.1394 | An08g10970        |
| evm.model.unitig_1.1395 | An08g10950        |
| evm.model.unitig_1.1396 | An08g10930        |
| evm.model.unitig_1.1397 | An08g10920        |
| evm.model.unitig_1.1399 | An08g10880        |
| evm.model.unitig_1.14   | An18g00230        |
| evm.model.unitig_1.140  | An18g02480        |
| evm.model.unitig_1.1400 | An08g10870        |
| evm.model.unitig_1.1401 | An08g10860        |
| evm.model.unitig_1.1402 | An08g10830        |
| evm.model.unitig_1.1403 | An08g10820        |
| evm.model.unitig_1.1404 | An08g10810        |
| evm.model.unitig_1.1405 | An08g10800        |
| evm.model.unitig_1.1406 | An08g10790        |
| evm.model.unitig_1.1407 | An08g10780        |
| evm.model.unitig_1.1409 | An08g10760        |
| evm.model.unitig_1.141  | An18g02490        |
| evm.model.unitig_1.1410 | An08g10750        |
| evm.model.unitig_1.1411 | An06g01970        |
| evm.model.unitig_1.1412 | An06g01980        |
| evm.model.unitig_1.1413 | An06g01990        |
| evm.model.unitig_1.1414 | An06g02000        |
| evm.model.unitig_1.1415 | An06g02010        |
| evm.model.unitig_1.1416 | An06g02020        |
| evm.model.unitig_1.1417 | An06g02030        |
| evm.model.unitig_1.1418 | An06g02040        |
| evm.model.unitig_1.1419 | An06g02050        |
| evm.model.unitig_1.142  | An18g02510        |
| evm.model.unitig_1.1420 | An06g02060        |
| evm.model.unitig_1.1421 | An07g06270        |
| evm.model.unitig_1.1422 | An06g02070        |
| evm.model.unitig_1.1423 | An06g02080        |
| evm.model.unitig_1.1424 | An06g02090        |
| evm.model.unitig_1.1425 | An11g05660        |
| evm.model.unitig_1.1426 | An06g02120        |
| evm.model.unitig_1.1427 | An01g11330        |

---



---

| Gene ID of H915-1       | Gene ID of 513.88 |
|-------------------------|-------------------|
| evm.model.unitig_1.1428 | An06g02150        |
| evm.model.unitig_1.143  | An18g02520        |
| evm.model.unitig_1.1430 | An06g02160        |
| evm.model.unitig_1.1431 | An06g02170        |
| evm.model.unitig_1.1432 | An06g02180        |
| evm.model.unitig_1.1434 | An06g02210        |
| evm.model.unitig_1.1435 | An06g02270        |
| evm.model.unitig_1.1436 | An06g02430        |
| evm.model.unitig_1.1438 | An02g00470        |
| evm.model.unitig_1.1439 | An06g02340        |
| evm.model.unitig_1.144  | An18g02550        |
| evm.model.unitig_1.1440 | An19g00290        |
| evm.model.unitig_1.1441 | An06g02380        |
| evm.model.unitig_1.1442 | An06g02400        |
| evm.model.unitig_1.1443 | An06g02420        |
| evm.model.unitig_1.1444 | An06g02430        |
| evm.model.unitig_1.1445 | An06g02450        |
| evm.model.unitig_1.1446 | An06g02460        |
| evm.model.unitig_1.1447 | An06g02470        |
| evm.model.unitig_1.1448 | An06g02480        |
| evm.model.unitig_1.1449 | An06g02500        |
| evm.model.unitig_1.145  | An18g02560        |
| evm.model.unitig_1.1450 | An06g02510        |
| evm.model.unitig_1.1451 | An02g13500        |
| evm.model.unitig_1.1452 | An06g02530        |
| evm.model.unitig_1.1453 | An06g02540        |
| evm.model.unitig_1.1454 | An06g02550        |
| evm.model.unitig_1.1455 | An08g03900        |
| evm.model.unitig_1.1456 | An08g03900        |
| evm.model.unitig_1.1457 | An06g02640        |
| evm.model.unitig_1.1458 | An06g02650        |
| evm.model.unitig_1.1459 | An06g02660        |
| evm.model.unitig_1.146  | An18g02600        |
| evm.model.unitig_1.1460 | An06g02670        |
| evm.model.unitig_1.1461 | An06g02680        |
| evm.model.unitig_1.1462 | An06g02680        |
| evm.model.unitig_1.1463 | An06g02700        |
| evm.model.unitig_1.1464 | An06g02710        |
| evm.model.unitig_1.1465 | An11g03420        |
| evm.model.unitig_1.147  | An18g02650        |
| evm.model.unitig_1.148  | An18g02680        |
| evm.model.unitig_1.149  | An18g02690        |
| evm.model.unitig_1.15   | An18g00240        |

---

---

| Gene ID of H915-1      | Gene ID of 513.88 |
|------------------------|-------------------|
| evm.model.unitig_1.150 | An18g02700        |
| evm.model.unitig_1.151 | An18g02710        |
| evm.model.unitig_1.152 | An18g02720        |
| evm.model.unitig_1.153 | An18g02730        |
| evm.model.unitig_1.154 | An12g01360        |
| evm.model.unitig_1.155 | An18g02750        |
| evm.model.unitig_1.156 | An18g02752        |
| evm.model.unitig_1.157 | An18g02760        |
| evm.model.unitig_1.158 | An18g02770        |
| evm.model.unitig_1.159 | An12g03140        |
| evm.model.unitig_1.16  | An18g00260        |
| evm.model.unitig_1.161 | An18g02800        |
| evm.model.unitig_1.162 | An18g02820        |
| evm.model.unitig_1.163 | An18g02830        |
| evm.model.unitig_1.164 | An18g02840        |
| evm.model.unitig_1.165 | An18g02860        |
| evm.model.unitig_1.166 | An18g02890        |
| evm.model.unitig_1.167 | An18g02900        |
| evm.model.unitig_1.168 | An18g02940        |
| evm.model.unitig_1.169 | An18g02950        |
| evm.model.unitig_1.17  | -                 |
| evm.model.unitig_1.170 | An18g02950        |
| evm.model.unitig_1.171 | An18g02960        |
| evm.model.unitig_1.172 | An18g02970        |
| evm.model.unitig_1.173 | An18g02980        |
| evm.model.unitig_1.174 | An18g02990        |
| evm.model.unitig_1.175 | An18g03000        |
| evm.model.unitig_1.176 | An18g03010        |
| evm.model.unitig_1.177 | An18g03020        |
| evm.model.unitig_1.178 | An18g03030        |
| evm.model.unitig_1.179 | An18g03040        |
| evm.model.unitig_1.18  | An18g00280        |
| evm.model.unitig_1.180 | An18g03060        |
| evm.model.unitig_1.181 | An18g03070        |
| evm.model.unitig_1.182 | An18g03080        |
| evm.model.unitig_1.183 | An18g03090        |
| evm.model.unitig_1.184 | An18g03100        |
| evm.model.unitig_1.185 | An18g03110        |
| evm.model.unitig_1.186 | An18g03120        |
| evm.model.unitig_1.187 | An18g03130        |
| evm.model.unitig_1.188 | An18g03150        |
| evm.model.unitig_1.189 | An18g03170        |
| evm.model.unitig_1.19  | An18g00290        |

---

---

| Gene ID of H915-1      | Gene ID of 513.88 |
|------------------------|-------------------|
| evm.model.unitig_1.190 | An18g03180        |
| evm.model.unitig_1.191 | An18g03190        |
| evm.model.unitig_1.192 | An18g03200        |
| evm.model.unitig_1.193 | An18g03210        |
| evm.model.unitig_1.194 | An18g03220        |
| evm.model.unitig_1.195 | An18g03230        |
| evm.model.unitig_1.196 | An18g03240        |
| evm.model.unitig_1.197 | An18g03250        |
| evm.model.unitig_1.198 | An18g03270        |
| evm.model.unitig_1.199 | An18g03290        |
| evm.model.unitig_1.2   | An16g06440        |
| evm.model.unitig_1.20  | An18g00300        |
| evm.model.unitig_1.200 | An18g03300        |
| evm.model.unitig_1.201 | An18g03310        |
| evm.model.unitig_1.202 | An18g03320        |
| evm.model.unitig_1.203 | An18g03330        |
| evm.model.unitig_1.204 | An18g03335        |
| evm.model.unitig_1.205 | An18g03340        |
| evm.model.unitig_1.206 | An18g03350        |
| evm.model.unitig_1.207 | An18g03380        |
| evm.model.unitig_1.208 | An18g03430        |
| evm.model.unitig_1.209 | An18g03450        |
| evm.model.unitig_1.21  | An18g00320        |
| evm.model.unitig_1.210 | An18g03470        |
| evm.model.unitig_1.211 | An18g03480        |
| evm.model.unitig_1.212 | An18g03490        |
| evm.model.unitig_1.213 | An18g03530        |
| evm.model.unitig_1.214 | -                 |
| evm.model.unitig_1.215 | An18g03550        |
| evm.model.unitig_1.216 | An18g03570        |
| evm.model.unitig_1.217 | An18g03580        |
| evm.model.unitig_1.218 | An18g03590        |
| evm.model.unitig_1.219 | An18g03600        |
| evm.model.unitig_1.22  | An18g00330        |
| evm.model.unitig_1.220 | An18g03610        |
| evm.model.unitig_1.221 | An18g03630        |
| evm.model.unitig_1.222 | An18g03660        |
| evm.model.unitig_1.223 | An18g03670        |
| evm.model.unitig_1.224 | An18g03690        |
| evm.model.unitig_1.225 | An18g03700        |
| evm.model.unitig_1.226 | An18g03710        |
| evm.model.unitig_1.227 | An18g03710        |
| evm.model.unitig_1.228 | An18g03730        |

---

---

| Gene ID of H915-1      | Gene ID of 513.88 |
|------------------------|-------------------|
| evm.model.unitig_1.229 | An18g03740        |
| evm.model.unitig_1.230 | An18g03760        |
| evm.model.unitig_1.231 | -                 |
| evm.model.unitig_1.232 | An18g03770        |
| evm.model.unitig_1.233 | An18g03780        |
| evm.model.unitig_1.234 | An18g03790        |
| evm.model.unitig_1.235 | An18g03800        |
| evm.model.unitig_1.236 | An18g03810        |
| evm.model.unitig_1.237 | An18g03820        |
| evm.model.unitig_1.238 | An18g03830        |
| evm.model.unitig_1.239 | An18g03870        |
| evm.model.unitig_1.24  | An18g00380        |
| evm.model.unitig_1.240 | An18g03880        |
| evm.model.unitig_1.241 | An18g03900        |
| evm.model.unitig_1.242 | An18g03910        |
| evm.model.unitig_1.243 | An18g03920        |
| evm.model.unitig_1.244 | An18g03930        |
| evm.model.unitig_1.245 | An18g03930        |
| evm.model.unitig_1.246 | An18g03950        |
| evm.model.unitig_1.247 | An18g03960        |
| evm.model.unitig_1.248 | An18g03970        |
| evm.model.unitig_1.249 | An18g03980        |
| evm.model.unitig_1.25  | An18g00390        |
| evm.model.unitig_1.250 | An18g03990        |
| evm.model.unitig_1.251 | An18g04010        |
| evm.model.unitig_1.252 | An18g04020        |
| evm.model.unitig_1.253 | An18g04030        |
| evm.model.unitig_1.254 | An18g04040        |
| evm.model.unitig_1.255 | An18g04060        |
| evm.model.unitig_1.257 | An18g04070        |
| evm.model.unitig_1.258 | An18g04080        |
| evm.model.unitig_1.259 | An18g04090        |
| evm.model.unitig_1.26  | An18g00400        |
| evm.model.unitig_1.260 | An18g04100        |
| evm.model.unitig_1.261 | An18g04110        |
| evm.model.unitig_1.262 | An18g04120        |
| evm.model.unitig_1.263 | An18g04130        |
| evm.model.unitig_1.264 | An18g04140        |
| evm.model.unitig_1.265 | An18g04150        |
| evm.model.unitig_1.266 | An18g04160        |
| evm.model.unitig_1.268 | An18g04170        |
| evm.model.unitig_1.269 | An18g04180        |
| evm.model.unitig_1.27  | An18g00410        |

---

---

| Gene ID of H915-1      | Gene ID of 513.88 |
|------------------------|-------------------|
| evm.model.unitig_1.270 | An18g04190        |
| evm.model.unitig_1.271 | An18g04200        |
| evm.model.unitig_1.272 | An18g04210        |
| evm.model.unitig_1.274 | An18g04220        |
| evm.model.unitig_1.275 | An18g04230        |
| evm.model.unitig_1.276 | An18g04240        |
| evm.model.unitig_1.277 | An18g04250        |
| evm.model.unitig_1.278 | An18g04260        |
| evm.model.unitig_1.279 | An18g04270        |
| evm.model.unitig_1.28  | An18g00420        |
| evm.model.unitig_1.280 | An18g04280        |
| evm.model.unitig_1.281 | An18g04290        |
| evm.model.unitig_1.282 | An18g04300        |
| evm.model.unitig_1.283 | An18g04310        |
| evm.model.unitig_1.284 | An18g04320        |
| evm.model.unitig_1.285 | An18g04330        |
| evm.model.unitig_1.286 | An18g04340        |
| evm.model.unitig_1.287 | An18g04350        |
| evm.model.unitig_1.288 | An18g04360        |
| evm.model.unitig_1.289 | An18g04400        |
| evm.model.unitig_1.29  | An18g00430        |
| evm.model.unitig_1.290 | An18g04410        |
| evm.model.unitig_1.291 | An18g04420        |
| evm.model.unitig_1.292 | An18g04430        |
| evm.model.unitig_1.293 | An18g04440        |
| evm.model.unitig_1.294 | An18g04460        |
| evm.model.unitig_1.295 | An18g04470        |
| evm.model.unitig_1.296 | An18g04480        |
| evm.model.unitig_1.297 | An18g04490        |
| evm.model.unitig_1.298 | An18g04520        |
| evm.model.unitig_1.299 | An18g04530        |
| evm.model.unitig_1.3   | An18g00010        |
| evm.model.unitig_1.30  | An18g00440        |
| evm.model.unitig_1.300 | An18g04540        |
| evm.model.unitig_1.301 | An18g04550        |
| evm.model.unitig_1.302 | An18g04560        |
| evm.model.unitig_1.303 | An18g04570        |
| evm.model.unitig_1.304 | An18g04580        |
| evm.model.unitig_1.305 | An18g04590        |
| evm.model.unitig_1.306 | An18g04600        |
| evm.model.unitig_1.307 | An18g04610        |
| evm.model.unitig_1.308 | An18g04620        |
| evm.model.unitig_1.309 | An18g04640        |

---

---

| Gene ID of H915-1      | Gene ID of 513.88 |
|------------------------|-------------------|
| evm.model.unitig_1.31  | An18g00460        |
| evm.model.unitig_1.310 | An18g04650        |
| evm.model.unitig_1.311 | An18g04660        |
| evm.model.unitig_1.312 | An18g04670        |
| evm.model.unitig_1.313 | An18g04690        |
| evm.model.unitig_1.314 | An18g04730        |
| evm.model.unitig_1.315 | An18g04750        |
| evm.model.unitig_1.316 | An18g04780        |
| evm.model.unitig_1.317 | An18g04790        |
| evm.model.unitig_1.318 | -                 |
| evm.model.unitig_1.319 | An18g04800        |
| evm.model.unitig_1.32  | An18g00470        |
| evm.model.unitig_1.320 | An18g04810        |
| evm.model.unitig_1.322 | An18g04840        |
| evm.model.unitig_1.323 | An18g04850        |
| evm.model.unitig_1.324 | An18g04870        |
| evm.model.unitig_1.325 | An18g04880        |
| evm.model.unitig_1.327 | An18g05000        |
| evm.model.unitig_1.328 | An18g05020        |
| evm.model.unitig_1.329 | An18g05040        |
| evm.model.unitig_1.33  | An18g00490        |
| evm.model.unitig_1.330 | An18g05050        |
| evm.model.unitig_1.331 | An18g05060        |
| evm.model.unitig_1.332 | An18g05070        |
| evm.model.unitig_1.333 | An18g05080        |
| evm.model.unitig_1.334 | An18g05090        |
| evm.model.unitig_1.335 | An18g05100        |
| evm.model.unitig_1.336 | An18g05110        |
| evm.model.unitig_1.337 | An18g05120        |
| evm.model.unitig_1.338 | An18g05130        |
| evm.model.unitig_1.339 | An18g05140        |
| evm.model.unitig_1.34  | An18g00500        |
| evm.model.unitig_1.340 | An18g05150        |
| evm.model.unitig_1.341 | An18g05170        |
| evm.model.unitig_1.342 | An18g05180        |
| evm.model.unitig_1.343 | An18g05190        |
| evm.model.unitig_1.344 | An18g05210        |
| evm.model.unitig_1.345 | An18g05220        |
| evm.model.unitig_1.346 | An18g05230        |
| evm.model.unitig_1.348 | An18g05270        |
| evm.model.unitig_1.349 | An18g05280        |
| evm.model.unitig_1.35  | An18g00510        |
| evm.model.unitig_1.350 | An18g05340        |

---

---

| Gene ID of H915-1      | Gene ID of 513.88 |
|------------------------|-------------------|
| evm.model.unitig_1.351 | An18g05380        |
| evm.model.unitig_1.352 | An18g05420        |
| evm.model.unitig_1.353 | An18g05430        |
| evm.model.unitig_1.354 | An18g05450        |
| evm.model.unitig_1.355 | An18g05470        |
| evm.model.unitig_1.356 | An18g05480        |
| evm.model.unitig_1.357 | An18g05490        |
| evm.model.unitig_1.358 | An18g05500        |
| evm.model.unitig_1.359 | An18g05520        |
| evm.model.unitig_1.36  | An18g00520        |
| evm.model.unitig_1.360 | An18g05540        |
| evm.model.unitig_1.361 | An18g05550        |
| evm.model.unitig_1.362 | An18g05560        |
| evm.model.unitig_1.363 | An18g05570        |
| evm.model.unitig_1.364 | An18g05590        |
| evm.model.unitig_1.365 | An18g05600        |
| evm.model.unitig_1.366 | An18g05610        |
| evm.model.unitig_1.367 | An18g05620        |
| evm.model.unitig_1.368 | An18g05630        |
| evm.model.unitig_1.369 | An18g05640        |
| evm.model.unitig_1.37  | An18g00540        |
| evm.model.unitig_1.370 | An18g05650        |
| evm.model.unitig_1.371 | An18g05660        |
| evm.model.unitig_1.372 | An18g05670        |
| evm.model.unitig_1.373 | An18g05680        |
| evm.model.unitig_1.374 | An18g05690        |
| evm.model.unitig_1.375 | -                 |
| evm.model.unitig_1.376 | An18g05700        |
| evm.model.unitig_1.377 | An18g05710        |
| evm.model.unitig_1.378 | An18g05720        |
| evm.model.unitig_1.379 | An18g05730        |
| evm.model.unitig_1.38  | An18g00540        |
| evm.model.unitig_1.380 | An18g05740        |
| evm.model.unitig_1.381 | An18g05750        |
| evm.model.unitig_1.382 | An18g05760        |
| evm.model.unitig_1.383 | An18g05770        |
| evm.model.unitig_1.384 | An18g05780        |
| evm.model.unitig_1.385 | An18g05800        |
| evm.model.unitig_1.386 | An18g05810        |
| evm.model.unitig_1.387 | An18g05820        |
| evm.model.unitig_1.388 | An18g05830        |
| evm.model.unitig_1.389 | An18g05840        |
| evm.model.unitig_1.39  | An18g00550        |

---

---

| Gene ID of H915-1      | Gene ID of 513.88 |
|------------------------|-------------------|
| evm.model.unitig_1.390 | An18g05850        |
| evm.model.unitig_1.391 | An18g05860        |
| evm.model.unitig_1.392 | An18g05870        |
| evm.model.unitig_1.393 | An18g05880        |
| evm.model.unitig_1.394 | An18g05890        |
| evm.model.unitig_1.395 | An18g05900        |
| evm.model.unitig_1.396 | An18g05910        |
| evm.model.unitig_1.397 | An18g05920        |
| evm.model.unitig_1.398 | An18g05940        |
| evm.model.unitig_1.399 | An18g05960        |
| evm.model.unitig_1.4   | An18g00030        |
| evm.model.unitig_1.406 | An08g08480        |
| evm.model.unitig_1.409 | An18g05980        |
| evm.model.unitig_1.41  | An18g00620        |
| evm.model.unitig_1.410 | An18g06010        |
| evm.model.unitig_1.411 | An18g06020        |
| evm.model.unitig_1.412 | An18g06050        |
| evm.model.unitig_1.413 | An18g06110        |
| evm.model.unitig_1.414 | An18g06120        |
| evm.model.unitig_1.415 | An18g06130        |
| evm.model.unitig_1.416 | An18g06160        |
| evm.model.unitig_1.417 | An18g06170        |
| evm.model.unitig_1.418 | An18g06190        |
| evm.model.unitig_1.419 | An18g06210        |
| evm.model.unitig_1.42  | An18g00630        |
| evm.model.unitig_1.420 | An18g06220        |
| evm.model.unitig_1.421 | An18g06230        |
| evm.model.unitig_1.422 | An18g06250        |
| evm.model.unitig_1.423 | An18g06260        |
| evm.model.unitig_1.424 | An18g06270        |
| evm.model.unitig_1.425 | An18g06290        |
| evm.model.unitig_1.426 | An18g06310        |
| evm.model.unitig_1.427 | An18g06320        |
| evm.model.unitig_1.428 | An18g06340        |
| evm.model.unitig_1.429 | An18g06350        |
| evm.model.unitig_1.43  | An18g00730        |
| evm.model.unitig_1.430 | An18g06360        |
| evm.model.unitig_1.431 | An18g06370        |
| evm.model.unitig_1.432 | An18g06380        |
| evm.model.unitig_1.433 | An18g06390        |
| evm.model.unitig_1.434 | An18g06400        |
| evm.model.unitig_1.435 | An18g06410        |
| evm.model.unitig_1.436 | An18g06430        |

---



---

| Gene ID of H915-1      | Gene ID of 513.88 |
|------------------------|-------------------|
| evm.model.unitig_1.437 | An18g06440        |
| evm.model.unitig_1.438 | An18g06470        |
| evm.model.unitig_1.439 | -                 |
| evm.model.unitig_1.44  | An18g00740        |
| evm.model.unitig_1.440 | An18g06490        |
| evm.model.unitig_1.441 | An18g06500        |
| evm.model.unitig_1.442 | An18g06510        |
| evm.model.unitig_1.443 | An18g06520        |
| evm.model.unitig_1.444 | An18g06540        |
| evm.model.unitig_1.445 | An18g06570        |
| evm.model.unitig_1.446 | An18g06580        |
| evm.model.unitig_1.447 | An18g06590        |
| evm.model.unitig_1.448 | An18g06600        |
| evm.model.unitig_1.449 | An18g06610        |
| evm.model.unitig_1.45  | An18g00740        |
| evm.model.unitig_1.451 | An18g06650        |
| evm.model.unitig_1.452 | An18g06670        |
| evm.model.unitig_1.453 | An18g06680        |
| evm.model.unitig_1.454 | An18g06690        |
| evm.model.unitig_1.455 | An18g06700        |
| evm.model.unitig_1.456 | An18g06710        |
| evm.model.unitig_1.457 | An18g06720        |
| evm.model.unitig_1.458 | An18g06730        |
| evm.model.unitig_1.459 | An18g06740        |
| evm.model.unitig_1.46  | An18g00810        |
| evm.model.unitig_1.460 | An18g06750        |
| evm.model.unitig_1.461 | An18g06760        |
| evm.model.unitig_1.463 | An18g06780        |
| evm.model.unitig_1.464 | An18g06800        |
| evm.model.unitig_1.465 | An18g06810        |
| evm.model.unitig_1.467 | An18g06820        |
| evm.model.unitig_1.468 | An18g06840        |
| evm.model.unitig_1.47  | An18g00820        |
| evm.model.unitig_1.471 | An18g04650        |
| evm.model.unitig_1.472 | An08g00010        |
| evm.model.unitig_1.473 | An08g00030        |
| evm.model.unitig_1.474 | An08g00070        |
| evm.model.unitig_1.475 | An08g00090        |
| evm.model.unitig_1.476 | An08g00100        |
| evm.model.unitig_1.477 | An08g00180        |
| evm.model.unitig_1.478 | An08g00210        |
| evm.model.unitig_1.479 | An15g05540        |
| evm.model.unitig_1.48  | An18g00840        |

---

---

| Gene ID of H915-1      | Gene ID of 513.88 |
|------------------------|-------------------|
| evm.model.unitig_1.480 | An08g00280        |
| evm.model.unitig_1.481 | An08g00290        |
| evm.model.unitig_1.482 | An08g00300        |
| evm.model.unitig_1.483 | An08g00310        |
| evm.model.unitig_1.484 | An08g00340        |
| evm.model.unitig_1.485 | An08g00340        |
| evm.model.unitig_1.486 | An08g00350        |
| evm.model.unitig_1.487 | An08g00360        |
| evm.model.unitig_1.488 | An08g00380        |
| evm.model.unitig_1.489 | An08g00400        |
| evm.model.unitig_1.49  | An18g00850        |
| evm.model.unitig_1.490 | An08g00410        |
| evm.model.unitig_1.491 | An08g00420        |
| evm.model.unitig_1.492 | An08g00430        |
| evm.model.unitig_1.493 | An08g00450        |
| evm.model.unitig_1.494 | An08g00470        |
| evm.model.unitig_1.495 | An08g00480        |
| evm.model.unitig_1.496 | An08g00490        |
| evm.model.unitig_1.497 | An08g00500        |
| evm.model.unitig_1.498 | An08g00510        |
| evm.model.unitig_1.499 | An08g00520        |
| evm.model.unitig_1.5   | An18g00040        |
| evm.model.unitig_1.50  | An18g00870        |
| evm.model.unitig_1.500 | An08g00540        |
| evm.model.unitig_1.501 | An08g00550        |
| evm.model.unitig_1.502 | An08g00560        |
| evm.model.unitig_1.503 | An08g00570        |
| evm.model.unitig_1.504 | An08g00580        |
| evm.model.unitig_1.505 | An08g00590        |
| evm.model.unitig_1.506 | An08g00600        |
| evm.model.unitig_1.507 | An08g00620        |
| evm.model.unitig_1.508 | An08g00630        |
| evm.model.unitig_1.509 | An08g00640        |
| evm.model.unitig_1.510 | An08g00660        |
| evm.model.unitig_1.511 | An08g00670        |
| evm.model.unitig_1.512 | An08g00680        |
| evm.model.unitig_1.513 | An08g00690        |
| evm.model.unitig_1.514 | An08g00700        |
| evm.model.unitig_1.515 | An08g00710        |
| evm.model.unitig_1.516 | An08g00720        |
| evm.model.unitig_1.517 | An08g00730        |
| evm.model.unitig_1.518 | An08g00740        |
| evm.model.unitig_1.519 | An08g00750        |

---

---

| Gene ID of H915-1      | Gene ID of 513.88 |
|------------------------|-------------------|
| evm.model.unitig_1.52  | An18g00910        |
| evm.model.unitig_1.520 | An08g00760        |
| evm.model.unitig_1.521 | An08g00770        |
| evm.model.unitig_1.522 | An08g00790        |
| evm.model.unitig_1.523 | An08g00800        |
| evm.model.unitig_1.524 | An08g00810        |
| evm.model.unitig_1.525 | An08g00830        |
| evm.model.unitig_1.526 | An08g00830        |
| evm.model.unitig_1.527 | An08g00840        |
| evm.model.unitig_1.528 | An08g00850        |
| evm.model.unitig_1.529 | An08g00860        |
| evm.model.unitig_1.53  | An18g00940        |
| evm.model.unitig_1.530 | An08g00870        |
| evm.model.unitig_1.531 | An08g00880        |
| evm.model.unitig_1.532 | An08g00890        |
| evm.model.unitig_1.533 | An08g00910        |
| evm.model.unitig_1.534 | An08g00920        |
| evm.model.unitig_1.535 | An08g00930        |
| evm.model.unitig_1.536 | An08g00940        |
| evm.model.unitig_1.537 | An08g00950        |
| evm.model.unitig_1.538 | -                 |
| evm.model.unitig_1.539 | An08g00960        |
| evm.model.unitig_1.54  | An18g00950        |
| evm.model.unitig_1.540 | An08g00970        |
| evm.model.unitig_1.541 | An08g00980        |
| evm.model.unitig_1.542 | An08g00990        |
| evm.model.unitig_1.543 | An08g01000        |
| evm.model.unitig_1.544 | An08g01020        |
| evm.model.unitig_1.545 | An08g01030        |
| evm.model.unitig_1.546 | An08g01040        |
| evm.model.unitig_1.547 | An08g01060        |
| evm.model.unitig_1.548 | -                 |
| evm.model.unitig_1.549 | An08g01070        |
| evm.model.unitig_1.55  | An18g00960        |
| evm.model.unitig_1.550 | An08g01080        |
| evm.model.unitig_1.551 | An08g01090        |
| evm.model.unitig_1.552 | An08g01100        |
| evm.model.unitig_1.553 | An08g01110        |
| evm.model.unitig_1.554 | An08g01120        |
| evm.model.unitig_1.555 | An08g01130        |
| evm.model.unitig_1.556 | An08g01140        |
| evm.model.unitig_1.557 | An08g01150        |
| evm.model.unitig_1.558 | An08g01160        |

---

---

| Gene ID of H915-1      | Gene ID of 513.88 |
|------------------------|-------------------|
| evm.model.unitig_1.559 | An08g01170        |
| evm.model.unitig_1.56  | An18g01000        |
| evm.model.unitig_1.560 | An08g01180        |
| evm.model.unitig_1.561 | An08g01190        |
| evm.model.unitig_1.562 | An08g01200        |
| evm.model.unitig_1.563 | An08g01210        |
| evm.model.unitig_1.564 | An08g01230        |
| evm.model.unitig_1.565 | An08g01240        |
| evm.model.unitig_1.566 | An08g01250        |
| evm.model.unitig_1.567 | An08g01260        |
| evm.model.unitig_1.568 | An08g01270        |
| evm.model.unitig_1.569 | An08g01280        |
| evm.model.unitig_1.570 | An08g01290        |
| evm.model.unitig_1.571 | An08g01300        |
| evm.model.unitig_1.572 | An08g01310        |
| evm.model.unitig_1.573 | An08g01320        |
| evm.model.unitig_1.574 | An08g01330        |
| evm.model.unitig_1.575 | An08g01340        |
| evm.model.unitig_1.576 | An08g01350        |
| evm.model.unitig_1.577 | An08g01360        |
| evm.model.unitig_1.578 | An08g01370        |
| evm.model.unitig_1.579 | An08g01380        |
| evm.model.unitig_1.58  | An18g01050        |
| evm.model.unitig_1.581 | An08g01420        |
| evm.model.unitig_1.582 | An08g01430        |
| evm.model.unitig_1.583 | An08g01440        |
| evm.model.unitig_1.584 | An08g01460        |
| evm.model.unitig_1.586 | An08g01480        |
| evm.model.unitig_1.587 | An08g01490        |
| evm.model.unitig_1.588 | An08g01500        |
| evm.model.unitig_1.589 | An08g01510        |
| evm.model.unitig_1.59  | An18g01120        |
| evm.model.unitig_1.590 | An08g01520        |
| evm.model.unitig_1.591 | An08g01540        |
| evm.model.unitig_1.592 | An08g01560        |
| evm.model.unitig_1.593 | An08g01580        |
| evm.model.unitig_1.594 | An08g01590        |
| evm.model.unitig_1.595 | An08g01600        |
| evm.model.unitig_1.596 | An08g01610        |
| evm.model.unitig_1.597 | An08g01630        |
| evm.model.unitig_1.598 | An08g01640        |
| evm.model.unitig_1.599 | An08g01650        |
| evm.model.unitig_1.6   | An18g00050        |

---

---

| Gene ID of H915-1      | Gene ID of 513.88 |
|------------------------|-------------------|
| evm.model.unitig_1.60  | An18g01130        |
| evm.model.unitig_1.600 | An08g01660        |
| evm.model.unitig_1.601 | An08g01680        |
| evm.model.unitig_1.602 | An08g01690        |
| evm.model.unitig_1.603 | An08g01710        |
| evm.model.unitig_1.604 | An08g01720        |
| evm.model.unitig_1.605 | An08g01730        |
| evm.model.unitig_1.606 | An08g01740        |
| evm.model.unitig_1.607 | An08g01750        |
| evm.model.unitig_1.608 | An08g01760        |
| evm.model.unitig_1.609 | An08g01770        |
| evm.model.unitig_1.61  | An18g01140        |
| evm.model.unitig_1.610 | An08g01780        |
| evm.model.unitig_1.611 | An08g01790        |
| evm.model.unitig_1.612 | An08g01800        |
| evm.model.unitig_1.613 | An08g01810        |
| evm.model.unitig_1.614 | An08g01840        |
| evm.model.unitig_1.615 | An08g01850        |
| evm.model.unitig_1.616 | -                 |
| evm.model.unitig_1.617 | An08g01860        |
| evm.model.unitig_1.618 | An08g01870        |
| evm.model.unitig_1.619 | An08g01890        |
| evm.model.unitig_1.62  | An18g01150        |
| evm.model.unitig_1.620 | An08g01900        |
| evm.model.unitig_1.621 | An08g01910        |
| evm.model.unitig_1.622 | An08g01920        |
| evm.model.unitig_1.623 | An08g01940        |
| evm.model.unitig_1.624 | An08g01950        |
| evm.model.unitig_1.625 | An08g01960        |
| evm.model.unitig_1.626 | An08g01970        |
| evm.model.unitig_1.627 | An08g01980        |
| evm.model.unitig_1.628 | An08g01990        |
| evm.model.unitig_1.629 | An08g02000        |
| evm.model.unitig_1.63  | An18g01150        |
| evm.model.unitig_1.630 | An08g02020        |
| evm.model.unitig_1.631 | An08g02030        |
| evm.model.unitig_1.632 | An08g02060        |
| evm.model.unitig_1.633 | An08g02080        |
| evm.model.unitig_1.634 | An08g02090        |
| evm.model.unitig_1.635 | An08g02110        |
| evm.model.unitig_1.636 | An08g02170        |
| evm.model.unitig_1.637 | An08g02180        |
| evm.model.unitig_1.638 | An08g02190        |

---

---

| Gene ID of H915-1      | Gene ID of 513.88 |
|------------------------|-------------------|
| evm.model.unitig_1.639 | An08g02200        |
| evm.model.unitig_1.64  | An18g01170        |
| evm.model.unitig_1.640 | An08g02210        |
| evm.model.unitig_1.641 | An08g02220        |
| evm.model.unitig_1.642 | An08g02230        |
| evm.model.unitig_1.643 | An08g02260        |
| evm.model.unitig_1.644 | An08g02280        |
| evm.model.unitig_1.645 | An08g02290        |
| evm.model.unitig_1.646 | An08g02310        |
| evm.model.unitig_1.647 | An08g02330        |
| evm.model.unitig_1.648 | An08g02340        |
| evm.model.unitig_1.649 | An08g02350        |
| evm.model.unitig_1.65  | An18g01180        |
| evm.model.unitig_1.650 | An08g02360        |
| evm.model.unitig_1.651 | An08g02390        |
| evm.model.unitig_1.652 | An08g02400        |
| evm.model.unitig_1.653 | -                 |
| evm.model.unitig_1.654 | An08g02410        |
| evm.model.unitig_1.655 | An08g02420        |
| evm.model.unitig_1.656 | An08g02440        |
| evm.model.unitig_1.657 | An08g02450        |
| evm.model.unitig_1.658 | An08g02460        |
| evm.model.unitig_1.659 | An08g02470        |
| evm.model.unitig_1.66  | An18g01180        |
| evm.model.unitig_1.660 | An08g02480        |
| evm.model.unitig_1.661 | An08g02500        |
| evm.model.unitig_1.662 | An08g02510        |
| evm.model.unitig_1.663 | An08g02520        |
| evm.model.unitig_1.664 | An08g02530        |
| evm.model.unitig_1.665 | An08g02580        |
| evm.model.unitig_1.666 | An08g02590        |
| evm.model.unitig_1.667 | An08g02600        |
| evm.model.unitig_1.668 | An08g02600        |
| evm.model.unitig_1.669 | An08g02670        |
| evm.model.unitig_1.67  | An18g01220        |
| evm.model.unitig_1.670 | An08g02680        |
| evm.model.unitig_1.671 | An08g02700        |
| evm.model.unitig_1.672 | An08g02710        |
| evm.model.unitig_1.673 | An08g02720        |
| evm.model.unitig_1.674 | An08g02730        |
| evm.model.unitig_1.675 | An08g02730        |
| evm.model.unitig_1.676 | An08g02770        |
| evm.model.unitig_1.677 | An08g02780        |

---

---

| Gene ID of H915-1      | Gene ID of 513.88 |
|------------------------|-------------------|
| evm.model.unitig_1.678 | An08g02790        |
| evm.model.unitig_1.679 | An08g02800        |
| evm.model.unitig_1.680 | An08g02810        |
| evm.model.unitig_1.681 | An08g02820        |
| evm.model.unitig_1.682 | An08g02830        |
| evm.model.unitig_1.683 | An08g02850        |
| evm.model.unitig_1.684 | An08g02860        |
| evm.model.unitig_1.685 | An08g02870        |
| evm.model.unitig_1.686 | An08g02900        |
| evm.model.unitig_1.687 | An08g02910        |
| evm.model.unitig_1.688 | An08g02920        |
| evm.model.unitig_1.689 | An08g02930        |
| evm.model.unitig_1.69  | An18g01250        |
| evm.model.unitig_1.690 | An08g02960        |
| evm.model.unitig_1.691 | An08g02970        |
| evm.model.unitig_1.692 | An08g02990        |
| evm.model.unitig_1.693 | An08g03000        |
| evm.model.unitig_1.694 | An08g03010        |
| evm.model.unitig_1.695 | An08g03030        |
| evm.model.unitig_1.696 | An08g03040        |
| evm.model.unitig_1.697 | An08g03060        |
| evm.model.unitig_1.698 | An08g03070        |
| evm.model.unitig_1.699 | An08g03080        |
| evm.model.unitig_1.7   | An18g00060        |
| evm.model.unitig_1.70  | An18g01290        |
| evm.model.unitig_1.700 | An08g03090        |
| evm.model.unitig_1.701 | An08g03120        |
| evm.model.unitig_1.703 | An08g03150        |
| evm.model.unitig_1.704 | An08g03170        |
| evm.model.unitig_1.705 | An08g03180        |
| evm.model.unitig_1.706 | An08g03190        |
| evm.model.unitig_1.707 | An08g03200        |
| evm.model.unitig_1.709 | An08g03240        |
| evm.model.unitig_1.71  | An18g01320        |
| evm.model.unitig_1.710 | An08g03250        |
| evm.model.unitig_1.711 | An08g03260        |
| evm.model.unitig_1.712 | An08g03270        |
| evm.model.unitig_1.713 | An08g03280        |
| evm.model.unitig_1.714 | An08g03290        |
| evm.model.unitig_1.715 | An08g03300        |
| evm.model.unitig_1.716 | An08g03320        |
| evm.model.unitig_1.717 | An08g03340        |
| evm.model.unitig_1.718 | An08g03360        |

---

---

| Gene ID of H915-1      | Gene ID of 513.88 |
|------------------------|-------------------|
| evm.model.unitig_1.719 | An08g03380        |
| evm.model.unitig_1.72  | An18g01350        |
| evm.model.unitig_1.720 | An08g03390        |
| evm.model.unitig_1.721 | An08g03400        |
| evm.model.unitig_1.722 | An08g03420        |
| evm.model.unitig_1.723 | An08g03430        |
| evm.model.unitig_1.724 | An08g03440        |
| evm.model.unitig_1.725 | An08g03450        |
| evm.model.unitig_1.726 | An08g03460        |
| evm.model.unitig_1.727 | An08g03470        |
| evm.model.unitig_1.728 | An08g03480        |
| evm.model.unitig_1.729 | An08g03490        |
| evm.model.unitig_1.73  | An18g01360        |
| evm.model.unitig_1.730 | An08g03493        |
| evm.model.unitig_1.731 | An08g03510        |
| evm.model.unitig_1.732 | An08g03520        |
| evm.model.unitig_1.733 | An08g03530        |
| evm.model.unitig_1.734 | An08g03550        |
| evm.model.unitig_1.735 | An08g03560        |
| evm.model.unitig_1.736 | An08g03570        |
| evm.model.unitig_1.737 | An08g03580        |
| evm.model.unitig_1.738 | An08g03590        |
| evm.model.unitig_1.739 | An08g03600        |
| evm.model.unitig_1.74  | An18g01380        |
| evm.model.unitig_1.740 | An08g03610        |
| evm.model.unitig_1.741 | An08g03620        |
| evm.model.unitig_1.742 | An08g03630        |
| evm.model.unitig_1.743 | An08g03640        |
| evm.model.unitig_1.744 | An08g03650        |
| evm.model.unitig_1.745 | An08g03660        |
| evm.model.unitig_1.746 | An08g03670        |
| evm.model.unitig_1.747 | An08g03680        |
| evm.model.unitig_1.748 | An08g03690        |
| evm.model.unitig_1.749 | An08g03700        |
| evm.model.unitig_1.75  | An18g01390        |
| evm.model.unitig_1.750 | An08g03710        |
| evm.model.unitig_1.751 | An08g03720        |
| evm.model.unitig_1.752 | An08g03730        |
| evm.model.unitig_1.753 | An08g03740        |
| evm.model.unitig_1.754 | An08g03750        |
| evm.model.unitig_1.755 | An08g03760        |
| evm.model.unitig_1.756 | An08g03770        |
| evm.model.unitig_1.757 | An08g03780        |

---



---

| Gene ID of H915-1      | Gene ID of 513.88 |
|------------------------|-------------------|
| evm.model.unitig_1.758 | An08g03790        |
| evm.model.unitig_1.759 | An08g03810        |
| evm.model.unitig_1.76  | An18g01400        |
| evm.model.unitig_1.760 | An08g03820        |
| evm.model.unitig_1.761 | An08g03830        |
| evm.model.unitig_1.762 | An08g03840        |
| evm.model.unitig_1.763 | An08g03850        |
| evm.model.unitig_1.764 | -                 |
| evm.model.unitig_1.765 | An08g03870        |
| evm.model.unitig_1.766 | An08g03880        |
| evm.model.unitig_1.767 | An08g03890        |
| evm.model.unitig_1.768 | An08g03900        |
| evm.model.unitig_1.769 | An08g03910        |
| evm.model.unitig_1.77  | An18g01410        |
| evm.model.unitig_1.770 | An08g03920        |
| evm.model.unitig_1.771 | An08g03930        |
| evm.model.unitig_1.772 | An08g03950        |
| evm.model.unitig_1.773 | An08g03960        |
| evm.model.unitig_1.774 | An08g03970        |
| evm.model.unitig_1.775 | An08g03980        |
| evm.model.unitig_1.776 | An08g04000        |
| evm.model.unitig_1.777 | An08g04015        |
| evm.model.unitig_1.778 | An08g04030        |
| evm.model.unitig_1.779 | An08g04040        |
| evm.model.unitig_1.78  | An18g01470        |
| evm.model.unitig_1.781 | An08g04060        |
| evm.model.unitig_1.782 | An08g04070        |
| evm.model.unitig_1.783 | An08g04080        |
| evm.model.unitig_1.784 | An08g04090        |
| evm.model.unitig_1.785 | An08g04100        |
| evm.model.unitig_1.786 | An08g04110        |
| evm.model.unitig_1.787 | An08g04120        |
| evm.model.unitig_1.788 | An08g04130        |
| evm.model.unitig_1.789 | An08g04140        |
| evm.model.unitig_1.79  | An18g01480        |
| evm.model.unitig_1.790 | An08g04150        |
| evm.model.unitig_1.791 | An08g04160        |
| evm.model.unitig_1.793 | An08g04240        |
| evm.model.unitig_1.794 | An08g04250        |
| evm.model.unitig_1.795 | An08g04260        |
| evm.model.unitig_1.796 | An08g04280        |
| evm.model.unitig_1.797 | An08g04290        |
| evm.model.unitig_1.798 | An08g04300        |

---

---

| Gene ID of H915-1      | Gene ID of 513.88 |
|------------------------|-------------------|
| evm.model.unitig_1.799 | An08g04310        |
| evm.model.unitig_1.8   | An18g00070        |
| evm.model.unitig_1.80  | An18g01490        |
| evm.model.unitig_1.800 | An08g04330        |
| evm.model.unitig_1.801 | An08g04350        |
| evm.model.unitig_1.802 | An08g04360        |
| evm.model.unitig_1.803 | An08g04370        |
| evm.model.unitig_1.804 | An08g04390        |
| evm.model.unitig_1.805 | An08g04400        |
| evm.model.unitig_1.806 | An08g04420        |
| evm.model.unitig_1.807 | An08g04430        |
| evm.model.unitig_1.808 | An08g04440        |
| evm.model.unitig_1.809 | An08g04450        |
| evm.model.unitig_1.810 | An08g04460        |
| evm.model.unitig_1.811 | An08g04470        |
| evm.model.unitig_1.812 | An08g04480        |
| evm.model.unitig_1.813 | An08g04500        |
| evm.model.unitig_1.814 | An08g04540        |
| evm.model.unitig_1.815 | An08g04550        |
| evm.model.unitig_1.816 | An08g04560        |
| evm.model.unitig_1.817 | An08g04570        |
| evm.model.unitig_1.818 | An08g04580        |
| evm.model.unitig_1.819 | An08g04590        |
| evm.model.unitig_1.82  | An18g01520        |
| evm.model.unitig_1.820 | An08g04630        |
| evm.model.unitig_1.821 | An08g04640        |
| evm.model.unitig_1.822 | An08g04640        |
| evm.model.unitig_1.824 | An08g04710        |
| evm.model.unitig_1.825 | An08g04740        |
| evm.model.unitig_1.826 | An08g04750        |
| evm.model.unitig_1.827 | An08g04780        |
| evm.model.unitig_1.828 | An08g04810        |
| evm.model.unitig_1.829 | An08g04820        |
| evm.model.unitig_1.83  | An18g01530        |
| evm.model.unitig_1.830 | An08g04830        |
| evm.model.unitig_1.831 | An08g04830        |
| evm.model.unitig_1.832 | An08g04860        |
| evm.model.unitig_1.833 | An15g05630        |
| evm.model.unitig_1.834 | An08g04870        |
| evm.model.unitig_1.835 | An08g04880        |
| evm.model.unitig_1.836 | An08g04890        |
| evm.model.unitig_1.837 | An08g04910        |
| evm.model.unitig_1.838 | An08g04920        |

---

---

| Gene ID of H915-1      | Gene ID of 513.88 |
|------------------------|-------------------|
| evm.model.unitig_1.839 | An08g04930        |
| evm.model.unitig_1.84  | An18g01540        |
| evm.model.unitig_1.840 | An08g04960        |
| evm.model.unitig_1.841 | An08g04990        |
| evm.model.unitig_1.842 | An08g05030        |
| evm.model.unitig_1.843 | An08g05050        |
| evm.model.unitig_1.844 | An08g05060        |
| evm.model.unitig_1.845 | An08g05070        |
| evm.model.unitig_1.846 | An08g05080        |
| evm.model.unitig_1.847 | An08g05100        |
| evm.model.unitig_1.848 | An08g05150        |
| evm.model.unitig_1.849 | An08g05160        |
| evm.model.unitig_1.85  | An18g01570        |
| evm.model.unitig_1.850 | An08g05190        |
| evm.model.unitig_1.851 | An08g05200        |
| evm.model.unitig_1.852 | An08g05230        |
| evm.model.unitig_1.854 | An08g05250        |
| evm.model.unitig_1.855 | An08g05260        |
| evm.model.unitig_1.856 | An08g05278        |
| evm.model.unitig_1.857 | An08g05290        |
| evm.model.unitig_1.858 | An08g05300        |
| evm.model.unitig_1.859 | An08g05310        |
| evm.model.unitig_1.86  | An18g01580        |
| evm.model.unitig_1.860 | An08g05320        |
| evm.model.unitig_1.861 | An08g05330        |
| evm.model.unitig_1.862 | An08g05340        |
| evm.model.unitig_1.863 | An08g05340        |
| evm.model.unitig_1.864 | An08g05360        |
| evm.model.unitig_1.865 | An08g05380        |
| evm.model.unitig_1.866 | An08g05390        |
| evm.model.unitig_1.867 | An08g05400        |
| evm.model.unitig_1.868 | An08g05410        |
| evm.model.unitig_1.869 | An08g05420        |
| evm.model.unitig_1.87  | An18g01590        |
| evm.model.unitig_1.870 | An08g05440        |
| evm.model.unitig_1.871 | An08g05450        |
| evm.model.unitig_1.872 | An08g05470        |
| evm.model.unitig_1.873 | An08g05490        |
| evm.model.unitig_1.874 | An08g05500        |
| evm.model.unitig_1.875 | An08g05510        |
| evm.model.unitig_1.876 | An08g05520        |
| evm.model.unitig_1.877 | An08g05530        |
| evm.model.unitig_1.878 | An08g05540        |

---

---

| Gene ID of H915-1      | Gene ID of 513.88 |
|------------------------|-------------------|
| evm.model.unitig_1.879 | An08g05560        |
| evm.model.unitig_1.88  | An18g01610        |
| evm.model.unitig_1.880 | An08g05570        |
| evm.model.unitig_1.881 | An08g05580        |
| evm.model.unitig_1.882 | An08g05590        |
| evm.model.unitig_1.883 | An08g05610        |
| evm.model.unitig_1.884 | An08g05640        |
| evm.model.unitig_1.885 | An08g05670        |
| evm.model.unitig_1.887 | An08g05680        |
| evm.model.unitig_1.888 | An08g05690        |
| evm.model.unitig_1.889 | An08g05700        |
| evm.model.unitig_1.89  | -                 |
| evm.model.unitig_1.890 | An08g05720        |
| evm.model.unitig_1.891 | An08g05730        |
| evm.model.unitig_1.892 | An08g05760        |
| evm.model.unitig_1.893 | An08g05780        |
| evm.model.unitig_1.894 | An08g05790        |
| evm.model.unitig_1.895 | An08g05820        |
| evm.model.unitig_1.896 | An08g05850        |
| evm.model.unitig_1.897 | An08g05860        |
| evm.model.unitig_1.898 | An08g05870        |
| evm.model.unitig_1.899 | -                 |
| evm.model.unitig_1.9   | An18g00090        |
| evm.model.unitig_1.90  | An18g01620        |
| evm.model.unitig_1.900 | An08g05890        |
| evm.model.unitig_1.901 | An08g05900        |
| evm.model.unitig_1.902 | An08g05910        |
| evm.model.unitig_1.903 | An08g05920        |
| evm.model.unitig_1.904 | An12g01470        |
| evm.model.unitig_1.905 | An08g05950        |
| evm.model.unitig_1.907 | An08g05970        |
| evm.model.unitig_1.908 | An08g06030        |
| evm.model.unitig_1.909 | An08g06050        |
| evm.model.unitig_1.91  | An18g01630        |
| evm.model.unitig_1.910 | An08g06060        |
| evm.model.unitig_1.911 | An08g06070        |
| evm.model.unitig_1.912 | An08g06080        |
| evm.model.unitig_1.913 | An08g06090        |
| evm.model.unitig_1.914 | An08g06100        |
| evm.model.unitig_1.915 | An08g06120        |
| evm.model.unitig_1.916 | -                 |
| evm.model.unitig_1.917 | An08g06130        |
| evm.model.unitig_1.918 | An08g06150        |

---

---

| Gene ID of H915-1      | Gene ID of 513.88 |
|------------------------|-------------------|
| evm.model.unitig_1.919 | An08g06160        |
| evm.model.unitig_1.92  | An18g01640        |
| evm.model.unitig_1.920 | An08g06170        |
| evm.model.unitig_1.921 | An08g06180        |
| evm.model.unitig_1.922 | An08g06190        |
| evm.model.unitig_1.923 | An08g06200        |
| evm.model.unitig_1.924 | An08g06210        |
| evm.model.unitig_1.925 | An08g06230        |
| evm.model.unitig_1.926 | An08g06240        |
| evm.model.unitig_1.927 | An08g06250        |
| evm.model.unitig_1.928 | An08g06260        |
| evm.model.unitig_1.929 | An08g06270        |
| evm.model.unitig_1.93  | An18g01670        |
| evm.model.unitig_1.930 | An08g06320        |
| evm.model.unitig_1.931 | An08g06330        |
| evm.model.unitig_1.932 | An08g06340        |
| evm.model.unitig_1.933 | An08g06350        |
| evm.model.unitig_1.934 | An08g06360        |
| evm.model.unitig_1.935 | An08g06380        |
| evm.model.unitig_1.936 | An08g06390        |
| evm.model.unitig_1.937 | An08g06400        |
| evm.model.unitig_1.938 | An08g06420        |
| evm.model.unitig_1.939 | An08g06430        |
| evm.model.unitig_1.94  | An18g01680        |
| evm.model.unitig_1.940 | An08g06440        |
| evm.model.unitig_1.941 | An08g06450        |
| evm.model.unitig_1.942 | An08g06460        |
| evm.model.unitig_1.943 | An08g06490        |
| evm.model.unitig_1.944 | An08g06500        |
| evm.model.unitig_1.945 | An08g06520        |
| evm.model.unitig_1.946 | An08g06530        |
| evm.model.unitig_1.947 | An08g06540        |
| evm.model.unitig_1.948 | An08g06560        |
| evm.model.unitig_1.949 | An08g06570        |
| evm.model.unitig_1.95  | An18g01690        |
| evm.model.unitig_1.950 | An08g06580        |
| evm.model.unitig_1.951 | An08g06590        |
| evm.model.unitig_1.952 | An08g06600        |
| evm.model.unitig_1.953 | An08g06610        |
| evm.model.unitig_1.954 | An08g06620        |
| evm.model.unitig_1.955 | An08g06630        |
| evm.model.unitig_1.956 | -                 |
| evm.model.unitig_1.957 | An08g06650        |

---

---

| Gene ID of H915-1      | Gene ID of 513.88 |
|------------------------|-------------------|
| evm.model.unitig_1.958 | An08g06660        |
| evm.model.unitig_1.959 | An08g06670        |
| evm.model.unitig_1.96  | An18g01700        |
| evm.model.unitig_1.960 | An08g06680        |
| evm.model.unitig_1.961 | An08g06690        |
| evm.model.unitig_1.962 | An08g06700        |
| evm.model.unitig_1.963 | An08g06710        |
| evm.model.unitig_1.964 | An08g06720        |
| evm.model.unitig_1.965 | An08g06730        |
| evm.model.unitig_1.966 | An08g06750        |
| evm.model.unitig_1.967 | An08g06760        |
| evm.model.unitig_1.968 | An08g06770        |
| evm.model.unitig_1.969 | An08g06780        |
| evm.model.unitig_1.97  | An18g01720        |
| evm.model.unitig_1.970 | An08g06790        |
| evm.model.unitig_1.971 | An08g06810        |
| evm.model.unitig_1.972 | An08g06850        |
| evm.model.unitig_1.973 | An08g06890        |
| evm.model.unitig_1.974 | An08g06940        |
| evm.model.unitig_1.975 | An08g06960        |
| evm.model.unitig_1.976 | An08g06980        |
| evm.model.unitig_1.977 | An08g06990        |
| evm.model.unitig_1.979 | An08g07020        |
| evm.model.unitig_1.98  | An18g01840        |
| evm.model.unitig_1.980 | An08g07030        |
| evm.model.unitig_1.981 | An08g07040        |
| evm.model.unitig_1.982 | An08g07050        |
| evm.model.unitig_1.983 | An08g07060        |
| evm.model.unitig_1.984 | An08g07070        |
| evm.model.unitig_1.985 | An08g07080        |
| evm.model.unitig_1.986 | An08g07090        |
| evm.model.unitig_1.987 | An08g07100        |
| evm.model.unitig_1.988 | An08g07120        |
| evm.model.unitig_1.989 | An08g07150        |
| evm.model.unitig_1.99  | An18g01860        |
| evm.model.unitig_1.991 | An08g07200        |
| evm.model.unitig_1.992 | An08g07210        |
| evm.model.unitig_1.993 | An08g07220        |
| evm.model.unitig_1.994 | An08g07230        |
| evm.model.unitig_1.995 | An08g07240        |
| evm.model.unitig_1.996 | An08g07250        |
| evm.model.unitig_1.997 | An08g07270        |
| evm.model.unitig_1.998 | An08g07280        |

---

---

| Gene ID of H915-1       | Gene ID of 513.88 |
|-------------------------|-------------------|
| evm.model.unitig_1.999  | An08g07290        |
| evm.model.unitig_13.2   | -                 |
| evm.model.unitig_16.2   | -                 |
| evm.model.unitig_19.2   | -                 |
| evm.model.unitig_2.1    | An01g15200        |
| evm.model.unitig_2.10   | An01g15120        |
| evm.model.unitig_2.100  | An01g13940        |
| evm.model.unitig_2.1000 | An01g01490        |
| evm.model.unitig_2.1001 | An01g01470        |
| evm.model.unitig_2.1002 | An01g01450        |
| evm.model.unitig_2.1003 | -                 |
| evm.model.unitig_2.1004 | An01g01430        |
| evm.model.unitig_2.1005 | An12g05390        |
| evm.model.unitig_2.1006 | An02g00470        |
| evm.model.unitig_2.1007 | An01g01400        |
| evm.model.unitig_2.1008 | An01g01390        |
| evm.model.unitig_2.1009 | An01g01380        |
| evm.model.unitig_2.101  | An01g13930        |
| evm.model.unitig_2.1010 | An01g01370        |
| evm.model.unitig_2.1011 | An01g01360        |
| evm.model.unitig_2.1012 | An01g01350        |
| evm.model.unitig_2.1013 | An01g01340        |
| evm.model.unitig_2.1014 | An01g01330        |
| evm.model.unitig_2.1015 | An01g01320        |
| evm.model.unitig_2.1016 | An01g01290        |
| evm.model.unitig_2.1017 | An01g01280        |
| evm.model.unitig_2.1018 | An01g01260        |
| evm.model.unitig_2.1019 | -                 |
| evm.model.unitig_2.102  | An01g13920        |
| evm.model.unitig_2.1020 | An01g01230        |
| evm.model.unitig_2.1021 | An01g01220        |
| evm.model.unitig_2.1022 | An04g02850        |
| evm.model.unitig_2.1023 | An01g01190        |
| evm.model.unitig_2.1024 | An01g01180        |
| evm.model.unitig_2.1025 | An01g01170        |
| evm.model.unitig_2.1026 | An01g01160        |
| evm.model.unitig_2.1027 | An01g01120        |
| evm.model.unitig_2.1029 | An01g01110        |
| evm.model.unitig_2.103  | An01g13910        |
| evm.model.unitig_2.1030 | An01g01090        |
| evm.model.unitig_2.1031 | An01g01080        |
| evm.model.unitig_2.1032 | An01g01070        |
| evm.model.unitig_2.1033 | An01g01060        |

---

---

| Gene ID of H915-1       | Gene ID of 513.88 |
|-------------------------|-------------------|
| evm.model.unitig_2.1034 | An01g01050        |
| evm.model.unitig_2.1035 | An08g11190        |
| evm.model.unitig_2.1036 | An01g01030        |
| evm.model.unitig_2.1037 | An01g01020        |
| evm.model.unitig_2.1038 | An01g01010        |
| evm.model.unitig_2.1039 | An01g01000        |
| evm.model.unitig_2.104  | An01g13900        |
| evm.model.unitig_2.1040 | An01g00960        |
| evm.model.unitig_2.1041 | An14g03300        |
| evm.model.unitig_2.1042 | An01g00950        |
| evm.model.unitig_2.1043 | An01g00930        |
| evm.model.unitig_2.1044 | An04g03170        |
| evm.model.unitig_2.1046 | An18g01740        |
| evm.model.unitig_2.1047 | An09g04810        |
| evm.model.unitig_2.1048 | An11g02870        |
| evm.model.unitig_2.1049 | An01g00890        |
| evm.model.unitig_2.105  | An01g13890        |
| evm.model.unitig_2.1050 | An01g00880        |
| evm.model.unitig_2.1051 | An01g00870        |
| evm.model.unitig_2.1052 | An01g00860        |
| evm.model.unitig_2.1053 | An01g00850        |
| evm.model.unitig_2.1054 | An01g00820        |
| evm.model.unitig_2.1056 | An01g00800        |
| evm.model.unitig_2.1057 | An01g00780        |
| evm.model.unitig_2.1058 | An01g00770        |
| evm.model.unitig_2.1059 | An01g00750        |
| evm.model.unitig_2.106  | An01g13880        |
| evm.model.unitig_2.1060 | An01g00730        |
| evm.model.unitig_2.1061 | An01g00720        |
| evm.model.unitig_2.1062 | An01g00710        |
| evm.model.unitig_2.1063 | An01g00700        |
| evm.model.unitig_2.1064 | An01g00690        |
| evm.model.unitig_2.1065 | An01g00680        |
| evm.model.unitig_2.1066 | An01g00660        |
| evm.model.unitig_2.1067 | An01g00640        |
| evm.model.unitig_2.1068 | An01g00630        |
| evm.model.unitig_2.1069 | An01g00620        |
| evm.model.unitig_2.107  | An01g13830        |
| evm.model.unitig_2.1070 | An01g00610        |
| evm.model.unitig_2.1071 | An01g00600        |
| evm.model.unitig_2.1072 | -                 |
| evm.model.unitig_2.1073 | An01g00570        |
| evm.model.unitig_2.1074 | An01g00560        |

---



---

| Gene ID of H915-1       | Gene ID of 513.88 |
|-------------------------|-------------------|
| evm.model.unitig_2.1075 | An01g00550        |
| evm.model.unitig_2.1076 | An01g00530        |
| evm.model.unitig_2.1077 | An01g00520        |
| evm.model.unitig_2.1078 | -                 |
| evm.model.unitig_2.1079 | An01g00510        |
| evm.model.unitig_2.108  | An01g13820        |
| evm.model.unitig_2.1080 | An01g00490        |
| evm.model.unitig_2.1081 | An01g00480        |
| evm.model.unitig_2.1083 | An01g00460        |
| evm.model.unitig_2.1084 | An01g00450        |
| evm.model.unitig_2.1086 | An01g01580        |
| evm.model.unitig_2.1087 | An01g00400        |
| evm.model.unitig_2.1088 | An01g00390        |
| evm.model.unitig_2.1089 | An01g00380        |
| evm.model.unitig_2.109  | An01g13810        |
| evm.model.unitig_2.1090 | An11g08190        |
| evm.model.unitig_2.1091 | An01g00370        |
| evm.model.unitig_2.1093 | An01g00340        |
| evm.model.unitig_2.1094 | An01g00330        |
| evm.model.unitig_2.1095 | An01g00290        |
| evm.model.unitig_2.1096 | An01g00280        |
| evm.model.unitig_2.1097 | An01g00270        |
| evm.model.unitig_2.1098 | An01g00260        |
| evm.model.unitig_2.1099 | An01g00250        |
| evm.model.unitig_2.11   | An01g15110        |
| evm.model.unitig_2.110  | An01g13790        |
| evm.model.unitig_2.1100 | An01g00240        |
| evm.model.unitig_2.1101 | An01g00220        |
| evm.model.unitig_2.1102 | An01g00210        |
| evm.model.unitig_2.1103 | An01g00200        |
| evm.model.unitig_2.1104 | An01g00190        |
| evm.model.unitig_2.1105 | An01g00170        |
| evm.model.unitig_2.1106 | An01g00160        |
| evm.model.unitig_2.1107 | An01g00150        |
| evm.model.unitig_2.1108 | An01g00140        |
| evm.model.unitig_2.1109 | An01g00130        |
| evm.model.unitig_2.111  | An01g13780        |
| evm.model.unitig_2.1110 | An01g00120        |
| evm.model.unitig_2.1111 | An01g00110        |
| evm.model.unitig_2.1112 | An01g00100        |
| evm.model.unitig_2.1113 | An01g00090        |
| evm.model.unitig_2.1114 | An01g00070        |
| evm.model.unitig_2.1115 | An01g00070        |

---

---

| Gene ID of H915-1       | Gene ID of 513.88 |
|-------------------------|-------------------|
| evm.model.unitig_2.1116 | An01g00060        |
| evm.model.unitig_2.1117 | An01g00050        |
| evm.model.unitig_2.1118 | An01g00040        |
| evm.model.unitig_2.1119 | An01g00030        |
| evm.model.unitig_2.112  | An01g13770        |
| evm.model.unitig_2.1120 | An03g03700        |
| evm.model.unitig_2.1121 | An02g08060        |
| evm.model.unitig_2.1122 | An14g04980        |
| evm.model.unitig_2.1124 | An14g00540        |
| evm.model.unitig_2.1126 | An13g00010        |
| evm.model.unitig_2.1127 | An13g00020        |
| evm.model.unitig_2.1128 | An13g00030        |
| evm.model.unitig_2.1129 | An13g00040        |
| evm.model.unitig_2.113  | An01g13750        |
| evm.model.unitig_2.1130 | An13g00050        |
| evm.model.unitig_2.1131 | An13g00050        |
| evm.model.unitig_2.1132 | An13g00080        |
| evm.model.unitig_2.1133 | An13g00090        |
| evm.model.unitig_2.1134 | An13g00100        |
| evm.model.unitig_2.1135 | An13g00110        |
| evm.model.unitig_2.1136 | An13g00130        |
| evm.model.unitig_2.1137 | An13g00140        |
| evm.model.unitig_2.1138 | An13g00210        |
| evm.model.unitig_2.1139 | An13g00220        |
| evm.model.unitig_2.114  | An01g13740        |
| evm.model.unitig_2.1140 | An13g00240        |
| evm.model.unitig_2.1141 | An13g00250        |
| evm.model.unitig_2.1142 | An13g00270        |
| evm.model.unitig_2.1143 | An13g00280        |
| evm.model.unitig_2.1144 | An13g00290        |
| evm.model.unitig_2.1145 | An13g00300        |
| evm.model.unitig_2.1146 | An13g00310        |
| evm.model.unitig_2.1147 | An13g00320        |
| evm.model.unitig_2.1148 | An13g00370        |
| evm.model.unitig_2.1149 | An13g00380        |
| evm.model.unitig_2.1150 | An13g00390        |
| evm.model.unitig_2.1151 | An13g00400        |
| evm.model.unitig_2.1152 | An13g00410        |
| evm.model.unitig_2.1153 | An13g00420        |
| evm.model.unitig_2.1154 | An16g07920        |
| evm.model.unitig_2.1155 | An13g00430        |
| evm.model.unitig_2.1156 | An13g00440        |
| evm.model.unitig_2.1157 | An13g00450        |

---

---

| Gene ID of H915-1       | Gene ID of 513.88 |
|-------------------------|-------------------|
| evm.model.unitig_2.1158 | An13g00460        |
| evm.model.unitig_2.1159 | An13g00480        |
| evm.model.unitig_2.1160 | An13g00510        |
| evm.model.unitig_2.1161 | An13g00520        |
| evm.model.unitig_2.1162 | An13g00540        |
| evm.model.unitig_2.1163 | An13g00550        |
| evm.model.unitig_2.1164 | An13g00560        |
| evm.model.unitig_2.1166 | An13g00590        |
| evm.model.unitig_2.1167 | An13g00600        |
| evm.model.unitig_2.1168 | An13g00610        |
| evm.model.unitig_2.1169 | An13g00620        |
| evm.model.unitig_2.117  | An01g13720        |
| evm.model.unitig_2.1170 | An13g00640        |
| evm.model.unitig_2.1171 | An13g00650        |
| evm.model.unitig_2.1172 | An13g00660        |
| evm.model.unitig_2.1173 | An13g00670        |
| evm.model.unitig_2.1174 | An13g00680        |
| evm.model.unitig_2.1175 | An13g00690        |
| evm.model.unitig_2.1176 | An13g00710        |
| evm.model.unitig_2.1177 | An13g00720        |
| evm.model.unitig_2.1178 | An13g00730        |
| evm.model.unitig_2.1179 | An13g00740        |
| evm.model.unitig_2.118  | An01g13690        |
| evm.model.unitig_2.1180 | An13g00750        |
| evm.model.unitig_2.1181 | An13g00760        |
| evm.model.unitig_2.1182 | An13g00770        |
| evm.model.unitig_2.1183 | An13g00780        |
| evm.model.unitig_2.1184 | An13g00790        |
| evm.model.unitig_2.1185 | An13g00793        |
| evm.model.unitig_2.1186 | An13g00800        |
| evm.model.unitig_2.1187 | An13g00810        |
| evm.model.unitig_2.1188 | An13g00840        |
| evm.model.unitig_2.1189 | An13g00850        |
| evm.model.unitig_2.119  | An01g13680        |
| evm.model.unitig_2.1190 | An13g00860        |
| evm.model.unitig_2.1191 | An13g00870        |
| evm.model.unitig_2.1192 | An13g00890        |
| evm.model.unitig_2.1193 | An13g00910        |
| evm.model.unitig_2.1194 | An13g00920        |
| evm.model.unitig_2.1195 | An13g00930        |
| evm.model.unitig_2.1196 | An13g00940        |
| evm.model.unitig_2.1197 | An13g00950        |
| evm.model.unitig_2.1198 | An13g00970        |

---

---

| Gene ID of H915-1       | Gene ID of 513.88 |
|-------------------------|-------------------|
| evm.model.unitig_2.1199 | An13g00980        |
| evm.model.unitig_2.12   | An01g15100        |
| evm.model.unitig_2.120  | An01g13670        |
| evm.model.unitig_2.1200 | An13g01000        |
| evm.model.unitig_2.1201 | An13g01010        |
| evm.model.unitig_2.1202 | An13g01020        |
| evm.model.unitig_2.1203 | An13g01040        |
| evm.model.unitig_2.1204 | An13g01050        |
| evm.model.unitig_2.1205 | An13g01060        |
| evm.model.unitig_2.1206 | An13g01080        |
| evm.model.unitig_2.1207 | An13g01090        |
| evm.model.unitig_2.1208 | An13g01120        |
| evm.model.unitig_2.1209 | An13g01130        |
| evm.model.unitig_2.121  | An01g13660        |
| evm.model.unitig_2.1210 | An17g01925        |
| evm.model.unitig_2.1211 | An13g01150        |
| evm.model.unitig_2.1212 | An13g01150        |
| evm.model.unitig_2.1213 | An13g01180        |
| evm.model.unitig_2.1214 | An13g01190        |
| evm.model.unitig_2.1215 | An13g01200        |
| evm.model.unitig_2.1218 | An13g01210        |
| evm.model.unitig_2.1219 | An13g01220        |
| evm.model.unitig_2.122  | An01g13650        |
| evm.model.unitig_2.1220 | -                 |
| evm.model.unitig_2.1221 | An13g01230        |
| evm.model.unitig_2.1222 | An13g01240        |
| evm.model.unitig_2.1223 | An12g05510        |
| evm.model.unitig_2.1224 | An13g01260        |
| evm.model.unitig_2.1225 | An13g01270        |
| evm.model.unitig_2.1226 | An13g01280        |
| evm.model.unitig_2.1227 | An13g01290        |
| evm.model.unitig_2.1228 | An13g01300        |
| evm.model.unitig_2.1229 | An13g01310        |
| evm.model.unitig_2.123  | An01g13640        |
| evm.model.unitig_2.1230 | -                 |
| evm.model.unitig_2.1231 | An13g01320        |
| evm.model.unitig_2.1232 | An13g01340        |
| evm.model.unitig_2.1233 | An13g01350        |
| evm.model.unitig_2.1234 | An13g01370        |
| evm.model.unitig_2.1235 | An13g01420        |
| evm.model.unitig_2.1236 | -                 |
| evm.model.unitig_2.1237 | An13g01440        |
| evm.model.unitig_2.1238 | An13g01450        |

---

---

| Gene ID of H915-1       | Gene ID of 513.88 |
|-------------------------|-------------------|
| evm.model.unitig_2.1239 | An13g01460        |
| evm.model.unitig_2.124  | An01g13630        |
| evm.model.unitig_2.1240 | An13g01480        |
| evm.model.unitig_2.1241 | An13g01490        |
| evm.model.unitig_2.1244 | An13g01520        |
| evm.model.unitig_2.1245 | An13g01530        |
| evm.model.unitig_2.1246 | An13g01540        |
| evm.model.unitig_2.1247 | An13g01560        |
| evm.model.unitig_2.1248 | An13g01590        |
| evm.model.unitig_2.1249 | An13g01600        |
| evm.model.unitig_2.125  | An01g13620        |
| evm.model.unitig_2.1250 | An13g01610        |
| evm.model.unitig_2.1251 | An13g01620        |
| evm.model.unitig_2.1252 | An13g01640        |
| evm.model.unitig_2.1253 | An13g01680        |
| evm.model.unitig_2.1254 | An13g01690        |
| evm.model.unitig_2.1255 | An13g01700        |
| evm.model.unitig_2.1256 | An13g01730        |
| evm.model.unitig_2.1257 | An13g01750        |
| evm.model.unitig_2.1258 | An13g01760        |
| evm.model.unitig_2.1259 | An13g01780        |
| evm.model.unitig_2.126  | An01g13610        |
| evm.model.unitig_2.1260 | An13g01790        |
| evm.model.unitig_2.1261 | An13g01800        |
| evm.model.unitig_2.1262 | An13g01810        |
| evm.model.unitig_2.1264 | An13g01840        |
| evm.model.unitig_2.1265 | An13g01860        |
| evm.model.unitig_2.1266 | An13g01870        |
| evm.model.unitig_2.1267 | An13g01880        |
| evm.model.unitig_2.1268 | An13g01890        |
| evm.model.unitig_2.1269 | An13g01920        |
| evm.model.unitig_2.127  | An01g13600        |
| evm.model.unitig_2.1270 | An13g01930        |
| evm.model.unitig_2.1271 | An13g01940        |
| evm.model.unitig_2.1272 | An13g01960        |
| evm.model.unitig_2.1273 | An13g01980        |
| evm.model.unitig_2.1275 | An08g03080        |
| evm.model.unitig_2.1276 | An13g02000        |
| evm.model.unitig_2.1277 | An13g02020        |
| evm.model.unitig_2.1278 | An13g02030        |
| evm.model.unitig_2.1279 | An13g02050        |
| evm.model.unitig_2.1280 | An13g02060        |
| evm.model.unitig_2.1281 | An13g02070        |

---

---

| Gene ID of H915-1       | Gene ID of 513.88 |
|-------------------------|-------------------|
| evm.model.unitig_2.1282 | An13g02080        |
| evm.model.unitig_2.1283 | An13g02090        |
| evm.model.unitig_2.1284 | An13g02100        |
| evm.model.unitig_2.1285 | An13g02130        |
| evm.model.unitig_2.1286 | An12g01700        |
| evm.model.unitig_2.1287 | An13g02160        |
| evm.model.unitig_2.1288 | An13g02180        |
| evm.model.unitig_2.1289 | An13g02220        |
| evm.model.unitig_2.129  | An01g13590        |
| evm.model.unitig_2.1290 | An13g02240        |
| evm.model.unitig_2.1291 | An13g02250        |
| evm.model.unitig_2.1292 | An13g02260        |
| evm.model.unitig_2.1293 | An13g02310        |
| evm.model.unitig_2.1294 | An14g03290        |
| evm.model.unitig_2.1295 | An13g02350        |
| evm.model.unitig_2.1296 | An13g02370        |
| evm.model.unitig_2.1297 | An13g02380        |
| evm.model.unitig_2.1299 | An13g02390        |
| evm.model.unitig_2.13   | An01g15070        |
| evm.model.unitig_2.130  | An01g13580        |
| evm.model.unitig_2.1300 | An13g02400        |
| evm.model.unitig_2.1301 | An13g02410        |
| evm.model.unitig_2.1302 | An13g02420        |
| evm.model.unitig_2.1303 | An13g02430        |
| evm.model.unitig_2.1304 | An13g02450        |
| evm.model.unitig_2.1305 | An13g02480        |
| evm.model.unitig_2.1308 | An13g02600        |
| evm.model.unitig_2.1309 | An13g02610        |
| evm.model.unitig_2.131  | An01g13560        |
| evm.model.unitig_2.1310 | An13g02620        |
| evm.model.unitig_2.1311 | An13g02640        |
| evm.model.unitig_2.1312 | An13g02680        |
| evm.model.unitig_2.1313 | An13g02690        |
| evm.model.unitig_2.1314 | An13g02780        |
| evm.model.unitig_2.1315 | An13g02790        |
| evm.model.unitig_2.1316 | An13g02790        |
| evm.model.unitig_2.1317 | An13g02820        |
| evm.model.unitig_2.1318 | An13g02880        |
| evm.model.unitig_2.132  | An01g13550        |
| evm.model.unitig_2.1320 | An08g03790        |
| evm.model.unitig_2.1321 | An13g02990        |
| evm.model.unitig_2.1322 | An13g03000        |
| evm.model.unitig_2.1323 | An13g03030        |

---

---

| Gene ID of H915-1       | Gene ID of 513.88 |
|-------------------------|-------------------|
| evm.model.unitig_2.1324 | An13g03050        |
| evm.model.unitig_2.1325 | An13g03130        |
| evm.model.unitig_2.1326 | An13g03140        |
| evm.model.unitig_2.1327 | An13g03190        |
| evm.model.unitig_2.1328 | An13g03220        |
| evm.model.unitig_2.1329 | An13g03240        |
| evm.model.unitig_2.133  | An01g13540        |
| evm.model.unitig_2.1330 | An13g03250        |
| evm.model.unitig_2.1331 | An13g03260        |
| evm.model.unitig_2.1333 | An13g03290        |
| evm.model.unitig_2.1334 | An13g03300        |
| evm.model.unitig_2.1335 | An13g03310        |
| evm.model.unitig_2.1336 | An13g03360        |
| evm.model.unitig_2.1337 | An13g03370        |
| evm.model.unitig_2.1338 | An13g03380        |
| evm.model.unitig_2.134  | An01g13530        |
| evm.model.unitig_2.1340 | An13g03430        |
| evm.model.unitig_2.1342 | An13g03470        |
| evm.model.unitig_2.1344 | An13g03490        |
| evm.model.unitig_2.1345 | An13g03500        |
| evm.model.unitig_2.1346 | An08g12200        |
| evm.model.unitig_2.1347 | An13g03560        |
| evm.model.unitig_2.1348 | An13g03570        |
| evm.model.unitig_2.1349 | An13g03590        |
| evm.model.unitig_2.135  | An01g13510        |
| evm.model.unitig_2.1351 | An13g03600        |
| evm.model.unitig_2.1352 | An13g03610        |
| evm.model.unitig_2.1353 | An13g03640        |
| evm.model.unitig_2.1354 | An06g00160        |
| evm.model.unitig_2.1355 | An13g03680        |
| evm.model.unitig_2.1356 | An13g03690        |
| evm.model.unitig_2.1357 | An13g03710        |
| evm.model.unitig_2.1358 | -                 |
| evm.model.unitig_2.1359 | An13g03800        |
| evm.model.unitig_2.136  | An01g13500        |
| evm.model.unitig_2.1360 | An13g03810        |
| evm.model.unitig_2.1361 | An13g03820        |
| evm.model.unitig_2.1362 | An13g03860        |
| evm.model.unitig_2.1363 | An13g03870        |
| evm.model.unitig_2.1364 | An13g03890        |
| evm.model.unitig_2.1365 | An13g03910        |
| evm.model.unitig_2.1366 | An13g03920        |
| evm.model.unitig_2.1367 | An13g03930        |

---

---

| Gene ID of H915-1       | Gene ID of 513.88 |
|-------------------------|-------------------|
| evm.model.unitig_2.1368 | An13g03940        |
| evm.model.unitig_2.1369 | An13g03950        |
| evm.model.unitig_2.137  | An01g13490        |
| evm.model.unitig_2.1370 | An13g03970        |
| evm.model.unitig_2.1371 | An13g03980        |
| evm.model.unitig_2.1372 | An13g03990        |
| evm.model.unitig_2.1373 | An13g04000        |
| evm.model.unitig_2.1374 | An13g04000        |
| evm.model.unitig_2.1376 | An13g04030        |
| evm.model.unitig_2.1377 | An13g04060        |
| evm.model.unitig_2.1378 | An13g04070        |
| evm.model.unitig_2.1379 | An13g04080        |
| evm.model.unitig_2.138  | An01g13480        |
| evm.model.unitig_2.1380 | An09g01340        |
| evm.model.unitig_2.1381 | An19g00420        |
| evm.model.unitig_2.1382 | An19g00410        |
| evm.model.unitig_2.1383 | An19g00400        |
| evm.model.unitig_2.1384 | An19g00390        |
| evm.model.unitig_2.1385 | An19g00380        |
| evm.model.unitig_2.1386 | An19g00370        |
| evm.model.unitig_2.1387 | An02g01120        |
| evm.model.unitig_2.1388 | An19g00360        |
| evm.model.unitig_2.1389 | An19g00350        |
| evm.model.unitig_2.139  | An01g13470        |
| evm.model.unitig_2.1390 | An19g00340        |
| evm.model.unitig_2.1391 | An19g00330        |
| evm.model.unitig_2.1392 | An19g00320        |
| evm.model.unitig_2.1393 | An19g00300        |
| evm.model.unitig_2.1394 | An19g00290        |
| evm.model.unitig_2.1395 | An19g00280        |
| evm.model.unitig_2.1396 | An19g00270        |
| evm.model.unitig_2.1397 | An19g00240        |
| evm.model.unitig_2.1398 | An19g00230        |
| evm.model.unitig_2.1399 | An19g00230        |
| evm.model.unitig_2.14   | An01g15020        |
| evm.model.unitig_2.140  | An16g05270        |
| evm.model.unitig_2.1400 | An19g00210        |
| evm.model.unitig_2.1401 | -                 |
| evm.model.unitig_2.1402 | An19g00180        |
| evm.model.unitig_2.1403 | An19g00170        |
| evm.model.unitig_2.1404 | An19g00160        |
| evm.model.unitig_2.1405 | -                 |
| evm.model.unitig_2.1406 | An19g00140        |

---



---

| Gene ID of H915-1       | Gene ID of 513.88 |
|-------------------------|-------------------|
| evm.model.unitig_2.1407 | An15g05440        |
| evm.model.unitig_2.1408 | An19g00120        |
| evm.model.unitig_2.1409 | An19g00110        |
| evm.model.unitig_2.141  | An01g13460        |
| evm.model.unitig_2.1410 | An19g00100        |
| evm.model.unitig_2.1411 | An19g00090        |
| evm.model.unitig_2.1412 | An19g00080        |
| evm.model.unitig_2.1414 | An19g00060        |
| evm.model.unitig_2.1415 | An19g00030        |
| evm.model.unitig_2.1416 | An19g00010        |
| evm.model.unitig_2.1417 | An11g09520        |
| evm.model.unitig_2.1418 | An15g04550        |
| evm.model.unitig_2.1419 | An03g00940        |
| evm.model.unitig_2.142  | An01g13450        |
| evm.model.unitig_2.1420 | An07g01380        |
| evm.model.unitig_2.143  | An01g13410        |
| evm.model.unitig_2.144  | An01g13400        |
| evm.model.unitig_2.145  | An01g13390        |
| evm.model.unitig_2.146  | An01g13370        |
| evm.model.unitig_2.147  | An01g13350        |
| evm.model.unitig_2.148  | An01g13340        |
| evm.model.unitig_2.149  | An01g13320        |
| evm.model.unitig_2.15   | An01g15010        |
| evm.model.unitig_2.150  | An01g13290        |
| evm.model.unitig_2.151  | An01g13280        |
| evm.model.unitig_2.152  | An01g13270        |
| evm.model.unitig_2.153  | An01g13260        |
| evm.model.unitig_2.154  | An01g13250        |
| evm.model.unitig_2.155  | An01g13240        |
| evm.model.unitig_2.156  | An01g13230        |
| evm.model.unitig_2.157  | An01g13220        |
| evm.model.unitig_2.158  | An01g13210        |
| evm.model.unitig_2.159  | An01g13200        |
| evm.model.unitig_2.16   | An01g15000        |
| evm.model.unitig_2.160  | An01g13190        |
| evm.model.unitig_2.161  | An01g13170        |
| evm.model.unitig_2.162  | An01g13160        |
| evm.model.unitig_2.163  | An01g13150        |
| evm.model.unitig_2.164  | An01g13130        |
| evm.model.unitig_2.165  | An01g13120        |
| evm.model.unitig_2.166  | An01g13100        |
| evm.model.unitig_2.167  | An01g13080        |
| evm.model.unitig_2.168  | An01g13070        |

---

---

| Gene ID of H915-1      | Gene ID of 513.88 |
|------------------------|-------------------|
| evm.model.unitig_2.169 | An01g13060        |
| evm.model.unitig_2.17  | An01g14990        |
| evm.model.unitig_2.170 | An01g13040        |
| evm.model.unitig_2.171 | An01g13030        |
| evm.model.unitig_2.172 | An01g13010        |
| evm.model.unitig_2.173 | An01g13000        |
| evm.model.unitig_2.174 | An01g12990        |
| evm.model.unitig_2.175 | An01g12970        |
| evm.model.unitig_2.176 | An01g12960        |
| evm.model.unitig_2.177 | An01g12940        |
| evm.model.unitig_2.178 | An01g12910        |
| evm.model.unitig_2.18  | An01g14980        |
| evm.model.unitig_2.180 | An01g12820        |
| evm.model.unitig_2.181 | An01g12810        |
| evm.model.unitig_2.182 | An01g12800        |
| evm.model.unitig_2.183 | An01g12780        |
| evm.model.unitig_2.184 | An01g12770        |
| evm.model.unitig_2.185 | An01g12760        |
| evm.model.unitig_2.186 | An01g12750        |
| evm.model.unitig_2.187 | An01g12740        |
| evm.model.unitig_2.188 | An01g12730        |
| evm.model.unitig_2.189 | An01g12720        |
| evm.model.unitig_2.19  | -                 |
| evm.model.unitig_2.190 | An01g12710        |
| evm.model.unitig_2.191 | An01g12700        |
| evm.model.unitig_2.192 | An01g12690        |
| evm.model.unitig_2.193 | An01g12640        |
| evm.model.unitig_2.194 | An01g12630        |
| evm.model.unitig_2.195 | An01g12620        |
| evm.model.unitig_2.196 | An01g12610        |
| evm.model.unitig_2.197 | An01g12600        |
| evm.model.unitig_2.198 | An01g12590        |
| evm.model.unitig_2.199 | An01g12580        |
| evm.model.unitig_2.2   | An01g15190        |
| evm.model.unitig_2.20  | An01g14970        |
| evm.model.unitig_2.200 | An01g12570        |
| evm.model.unitig_2.201 | An01g12550        |
| evm.model.unitig_2.202 | An01g12530        |
| evm.model.unitig_2.203 | An01g12520        |
| evm.model.unitig_2.204 | An01g12500        |
| evm.model.unitig_2.205 | An01g12480        |
| evm.model.unitig_2.206 | An01g12480        |
| evm.model.unitig_2.207 | An01g12470        |

---

---

| Gene ID of H915-1      | Gene ID of 513.88 |
|------------------------|-------------------|
| evm.model.unitig_2.208 | An01g12460        |
| evm.model.unitig_2.209 | An01g12450        |
| evm.model.unitig_2.21  | An01g14960        |
| evm.model.unitig_2.210 | An01g12440        |
| evm.model.unitig_2.211 | An01g12430        |
| evm.model.unitig_2.212 | An01g12410        |
| evm.model.unitig_2.213 | An01g12400        |
| evm.model.unitig_2.214 | An01g12390        |
| evm.model.unitig_2.215 | An01g12380        |
| evm.model.unitig_2.216 | An01g12370        |
| evm.model.unitig_2.217 | An01g12360        |
| evm.model.unitig_2.218 | An01g12350        |
| evm.model.unitig_2.219 | An01g12330        |
| evm.model.unitig_2.22  | An01g14950        |
| evm.model.unitig_2.220 | An01g12320        |
| evm.model.unitig_2.221 | An01g12310        |
| evm.model.unitig_2.222 | An01g12300        |
| evm.model.unitig_2.223 | An01g12290        |
| evm.model.unitig_2.224 | An01g12270        |
| evm.model.unitig_2.225 | An01g12240        |
| evm.model.unitig_2.226 | An01g12230        |
| evm.model.unitig_2.227 | An01g12220        |
| evm.model.unitig_2.228 | An01g12210        |
| evm.model.unitig_2.229 | An01g12200        |
| evm.model.unitig_2.23  | An01g14940        |
| evm.model.unitig_2.230 | An01g12190        |
| evm.model.unitig_2.231 | An01g12180        |
| evm.model.unitig_2.232 | An01g12170        |
| evm.model.unitig_2.233 | An01g12150        |
| evm.model.unitig_2.234 | An01g12130        |
| evm.model.unitig_2.235 | An01g12120        |
| evm.model.unitig_2.236 | An01g12110        |
| evm.model.unitig_2.237 | An01g12100        |
| evm.model.unitig_2.238 | An01g12090        |
| evm.model.unitig_2.239 | An01g12090        |
| evm.model.unitig_2.24  | An01g14930        |
| evm.model.unitig_2.240 | An09g00640        |
| evm.model.unitig_2.241 | An01g12050        |
| evm.model.unitig_2.242 | An01g01130        |
| evm.model.unitig_2.243 | An15g02130        |
| evm.model.unitig_2.244 | An01g12020        |
| evm.model.unitig_2.245 | An01g12010        |
| evm.model.unitig_2.246 | An01g12000        |

---

---

| Gene ID of H915-1      | Gene ID of 513.88 |
|------------------------|-------------------|
| evm.model.unitig_2.248 | An01g11970        |
| evm.model.unitig_2.249 | An01g11960        |
| evm.model.unitig_2.25  | An01g14920        |
| evm.model.unitig_2.250 | An01g11950        |
| evm.model.unitig_2.251 | An01g11940        |
| evm.model.unitig_2.252 | An01g11930        |
| evm.model.unitig_2.253 | An01g11920        |
| evm.model.unitig_2.254 | An01g11910        |
| evm.model.unitig_2.255 | An01g11900        |
| evm.model.unitig_2.256 | -                 |
| evm.model.unitig_2.257 | An01g11880        |
| evm.model.unitig_2.258 | An01g11880        |
| evm.model.unitig_2.259 | An01g11860        |
| evm.model.unitig_2.26  | An01g14910        |
| evm.model.unitig_2.260 | -                 |
| evm.model.unitig_2.261 | An01g11820        |
| evm.model.unitig_2.262 | An01g11810        |
| evm.model.unitig_2.263 | An01g11800        |
| evm.model.unitig_2.264 | An01g11790        |
| evm.model.unitig_2.265 | An01g11780        |
| evm.model.unitig_2.266 | An05g01060        |
| evm.model.unitig_2.267 | An01g11760        |
| evm.model.unitig_2.268 | An01g11750        |
| evm.model.unitig_2.269 | An01g11740        |
| evm.model.unitig_2.27  | An01g14900        |
| evm.model.unitig_2.270 | An01g11720        |
| evm.model.unitig_2.272 | An01g11690        |
| evm.model.unitig_2.273 | An01g11680        |
| evm.model.unitig_2.274 | An01g11670        |
| evm.model.unitig_2.275 | An01g11660        |
| evm.model.unitig_2.276 | An01g11650        |
| evm.model.unitig_2.277 | An01g11640        |
| evm.model.unitig_2.278 | -                 |
| evm.model.unitig_2.279 | An01g11620        |
| evm.model.unitig_2.28  | An01g14890        |
| evm.model.unitig_2.280 | An01g11610        |
| evm.model.unitig_2.281 | An01g11600        |
| evm.model.unitig_2.282 | An01g11580        |
| evm.model.unitig_2.283 | An01g11560        |
| evm.model.unitig_2.284 | An01g11560        |
| evm.model.unitig_2.285 | An01g11550        |
| evm.model.unitig_2.286 | An01g11540        |
| evm.model.unitig_2.287 | An01g11530        |

---

---

| Gene ID of H915-1      | Gene ID of 513.88 |
|------------------------|-------------------|
| evm.model.unitig_2.288 | An01g11520        |
| evm.model.unitig_2.289 | An01g11510        |
| evm.model.unitig_2.29  | An01g14880        |
| evm.model.unitig_2.291 | An16g04050        |
| evm.model.unitig_2.292 | An01g11480        |
| evm.model.unitig_2.293 | An01g11470        |
| evm.model.unitig_2.294 | An01g11450        |
| evm.model.unitig_2.295 | An01g11440        |
| evm.model.unitig_2.296 | An01g11430        |
| evm.model.unitig_2.297 | An01g11420        |
| evm.model.unitig_2.298 | An01g11410        |
| evm.model.unitig_2.299 | An01g11400        |
| evm.model.unitig_2.3   | An08g06440        |
| evm.model.unitig_2.30  | An01g14870        |
| evm.model.unitig_2.300 | An01g11390        |
| evm.model.unitig_2.301 | An01g11380        |
| evm.model.unitig_2.302 | An01g11360        |
| evm.model.unitig_2.303 | An01g11330        |
| evm.model.unitig_2.304 | An01g11310        |
| evm.model.unitig_2.305 | An01g11290        |
| evm.model.unitig_2.306 | An01g11270        |
| evm.model.unitig_2.307 | An01g11260        |
| evm.model.unitig_2.308 | An01g11250        |
| evm.model.unitig_2.309 | -                 |
| evm.model.unitig_2.31  | An01g14860        |
| evm.model.unitig_2.310 | An01g11200        |
| evm.model.unitig_2.311 | An01g11190        |
| evm.model.unitig_2.312 | An01g11150        |
| evm.model.unitig_2.313 | An01g11140        |
| evm.model.unitig_2.314 | An01g11130        |
| evm.model.unitig_2.315 | An01g11100        |
| evm.model.unitig_2.316 | An01g11080        |
| evm.model.unitig_2.317 | An01g11010        |
| evm.model.unitig_2.318 | An01g11000        |
| evm.model.unitig_2.319 | An01g10990        |
| evm.model.unitig_2.32  | An01g14840        |
| evm.model.unitig_2.320 | An01g10980        |
| evm.model.unitig_2.321 | An01g10970        |
| evm.model.unitig_2.322 | An01g10960        |
| evm.model.unitig_2.323 | An01g10950        |
| evm.model.unitig_2.324 | An01g10930        |
| evm.model.unitig_2.325 | An01g10920        |
| evm.model.unitig_2.326 | An01g10910        |

---

---

| Gene ID of H915-1      | Gene ID of 513.88 |
|------------------------|-------------------|
| evm.model.unitig_2.327 | An01g10900        |
| evm.model.unitig_2.328 | An01g10880        |
| evm.model.unitig_2.329 | An01g10870        |
| evm.model.unitig_2.33  | An01g14820        |
| evm.model.unitig_2.330 | An01g10860        |
| evm.model.unitig_2.331 | An01g10850        |
| evm.model.unitig_2.332 | An01g10840        |
| evm.model.unitig_2.333 | An01g10820        |
| evm.model.unitig_2.334 | An01g10810        |
| evm.model.unitig_2.335 | An01g10800        |
| evm.model.unitig_2.336 | An01g10790        |
| evm.model.unitig_2.337 | An01g10760        |
| evm.model.unitig_2.338 | An01g10750        |
| evm.model.unitig_2.339 | An01g10740        |
| evm.model.unitig_2.340 | An01g10730        |
| evm.model.unitig_2.341 | -                 |
| evm.model.unitig_2.342 | An01g10700        |
| evm.model.unitig_2.343 | An01g10690        |
| evm.model.unitig_2.344 | An01g10680        |
| evm.model.unitig_2.345 | An01g10660        |
| evm.model.unitig_2.346 | An01g10650        |
| evm.model.unitig_2.347 | An01g10640        |
| evm.model.unitig_2.348 | An01g10620        |
| evm.model.unitig_2.349 | An01g10610        |
| evm.model.unitig_2.35  | An01g14800        |
| evm.model.unitig_2.350 | An01g10600        |
| evm.model.unitig_2.351 | An01g10580        |
| evm.model.unitig_2.352 | An01g10570        |
| evm.model.unitig_2.353 | An01g10540        |
| evm.model.unitig_2.354 | An01g10490        |
| evm.model.unitig_2.355 | An01g10460        |
| evm.model.unitig_2.357 | An01g10380        |
| evm.model.unitig_2.358 | An01g10360        |
| evm.model.unitig_2.359 | An01g10350        |
| evm.model.unitig_2.360 | An01g10340        |
| evm.model.unitig_2.361 | An01g10320        |
| evm.model.unitig_2.362 | An01g10310        |
| evm.model.unitig_2.363 | An01g10290        |
| evm.model.unitig_2.364 | An07g00050        |
| evm.model.unitig_2.365 | An01g10270        |
| evm.model.unitig_2.367 | An01g10240        |
| evm.model.unitig_2.368 | An01g10200        |
| evm.model.unitig_2.369 | An01g10190        |

---

---

| Gene ID of H915-1      | Gene ID of 513.88 |
|------------------------|-------------------|
| evm.model.unitig_2.37  | An01g14790        |
| evm.model.unitig_2.370 | An01g10170        |
| evm.model.unitig_2.371 | An01g10150        |
| evm.model.unitig_2.372 | An01g10140        |
| evm.model.unitig_2.374 | An01g10100        |
| evm.model.unitig_2.375 | An01g10060        |
| evm.model.unitig_2.376 | An01g10050        |
| evm.model.unitig_2.377 | An01g10030        |
| evm.model.unitig_2.379 | An01g10010        |
| evm.model.unitig_2.38  | An01g14780        |
| evm.model.unitig_2.380 | An01g10000        |
| evm.model.unitig_2.381 | An01g09980        |
| evm.model.unitig_2.382 | An01g09960        |
| evm.model.unitig_2.383 | An01g09950        |
| evm.model.unitig_2.384 | An01g09940        |
| evm.model.unitig_2.385 | An01g09930        |
| evm.model.unitig_2.386 | An01g09920        |
| evm.model.unitig_2.387 | An01g09910        |
| evm.model.unitig_2.388 | An01g09900        |
| evm.model.unitig_2.389 | An01g09890        |
| evm.model.unitig_2.39  | An01g14770        |
| evm.model.unitig_2.390 | An01g09880        |
| evm.model.unitig_2.391 | An01g09870        |
| evm.model.unitig_2.392 | An01g09860        |
| evm.model.unitig_2.393 | An01g09850        |
| evm.model.unitig_2.394 | An01g09830        |
| evm.model.unitig_2.395 | An01g09820        |
| evm.model.unitig_2.396 | An01g09810        |
| evm.model.unitig_2.397 | An01g09800        |
| evm.model.unitig_2.398 | An01g09780        |
| evm.model.unitig_2.399 | An01g09770        |
| evm.model.unitig_2.4   | An18g04130        |
| evm.model.unitig_2.40  | An01g14760        |
| evm.model.unitig_2.400 | An01g09760        |
| evm.model.unitig_2.401 | An01g09750        |
| evm.model.unitig_2.402 | An01g09740        |
| evm.model.unitig_2.403 | An01g09730        |
| evm.model.unitig_2.404 | An01g09650        |
| evm.model.unitig_2.406 | An01g09640        |
| evm.model.unitig_2.407 | An01g09630        |
| evm.model.unitig_2.408 | An01g09620        |
| evm.model.unitig_2.409 | An01g09610        |
| evm.model.unitig_2.41  | An01g14740        |

---

---

| Gene ID of H915-1      | Gene ID of 513.88 |
|------------------------|-------------------|
| evm.model.unitig_2.411 | An01g09590        |
| evm.model.unitig_2.412 | An01g09580        |
| evm.model.unitig_2.413 | An01g09570        |
| evm.model.unitig_2.414 | An01g09560        |
| evm.model.unitig_2.415 | An01g09550        |
| evm.model.unitig_2.416 | An01g09540        |
| evm.model.unitig_2.417 | An01g09530        |
| evm.model.unitig_2.418 | An01g09520        |
| evm.model.unitig_2.419 | An01g09510        |
| evm.model.unitig_2.42  | An01g14730        |
| evm.model.unitig_2.420 | An01g09500        |
| evm.model.unitig_2.421 | An01g09480        |
| evm.model.unitig_2.422 | An01g09460        |
| evm.model.unitig_2.423 | An01g09450        |
| evm.model.unitig_2.424 | An01g09410        |
| evm.model.unitig_2.425 | An01g09400        |
| evm.model.unitig_2.426 | An01g09390        |
| evm.model.unitig_2.427 | An01g09380        |
| evm.model.unitig_2.428 | An01g09350        |
| evm.model.unitig_2.429 | An01g09330        |
| evm.model.unitig_2.43  | An01g14720        |
| evm.model.unitig_2.430 | An01g09320        |
| evm.model.unitig_2.431 | An01g09310        |
| evm.model.unitig_2.432 | An01g09300        |
| evm.model.unitig_2.433 | An01g09290        |
| evm.model.unitig_2.434 | An01g09270        |
| evm.model.unitig_2.435 | An01g09260        |
| evm.model.unitig_2.436 | An01g09250        |
| evm.model.unitig_2.437 | An01g09240        |
| evm.model.unitig_2.438 | An01g09220        |
| evm.model.unitig_2.439 | An01g09210        |
| evm.model.unitig_2.44  | An01g14710        |
| evm.model.unitig_2.440 | An01g09190        |
| evm.model.unitig_2.441 | An01g09180        |
| evm.model.unitig_2.442 | An01g09170        |
| evm.model.unitig_2.443 | An01g09160        |
| evm.model.unitig_2.444 | An01g09160        |
| evm.model.unitig_2.445 | An01g09130        |
| evm.model.unitig_2.446 | An01g09130        |
| evm.model.unitig_2.447 | An01g09120        |
| evm.model.unitig_2.448 | An01g09110        |
| evm.model.unitig_2.449 | An01g09100        |
| evm.model.unitig_2.45  | An01g14690        |

---



---

| Gene ID of H915-1      | Gene ID of 513.88 |
|------------------------|-------------------|
| evm.model.unitig_2.450 | An01g09090        |
| evm.model.unitig_2.451 | An07g06910        |
| evm.model.unitig_2.452 | An01g09050        |
| evm.model.unitig_2.453 | An01g09040        |
| evm.model.unitig_2.454 | An01g09030        |
| evm.model.unitig_2.455 | An01g09020        |
| evm.model.unitig_2.456 | An01g09010        |
| evm.model.unitig_2.457 | An01g09000        |
| evm.model.unitig_2.458 | An01g08990        |
| evm.model.unitig_2.459 | An01g08980        |
| evm.model.unitig_2.46  | An01g14680        |
| evm.model.unitig_2.460 | An01g08970        |
| evm.model.unitig_2.461 | An01g08960        |
| evm.model.unitig_2.462 | An01g08950        |
| evm.model.unitig_2.463 | An01g08950        |
| evm.model.unitig_2.464 | An01g08930        |
| evm.model.unitig_2.465 | An01g08920        |
| evm.model.unitig_2.466 | An01g08910        |
| evm.model.unitig_2.467 | An01g08900        |
| evm.model.unitig_2.468 | An01g08890        |
| evm.model.unitig_2.469 | An01g08880        |
| evm.model.unitig_2.47  | An01g14670        |
| evm.model.unitig_2.470 | An01g08870        |
| evm.model.unitig_2.471 | An01g08860        |
| evm.model.unitig_2.472 | An01g08850        |
| evm.model.unitig_2.473 | An01g08840        |
| evm.model.unitig_2.474 | An01g08830        |
| evm.model.unitig_2.475 | -                 |
| evm.model.unitig_2.476 | -                 |
| evm.model.unitig_2.477 | An01g08790        |
| evm.model.unitig_2.478 | An01g08780        |
| evm.model.unitig_2.479 | -                 |
| evm.model.unitig_2.48  | An01g14660        |
| evm.model.unitig_2.480 | An01g08730        |
| evm.model.unitig_2.481 | An01g08720        |
| evm.model.unitig_2.482 | An01g08700        |
| evm.model.unitig_2.483 | An01g08690        |
| evm.model.unitig_2.484 | An01g08670        |
| evm.model.unitig_2.485 | An01g08660        |
| evm.model.unitig_2.486 | An01g08650        |
| evm.model.unitig_2.487 | An01g08630        |
| evm.model.unitig_2.488 | An01g08620        |
| evm.model.unitig_2.489 | An01g08610        |

---

---

| Gene ID of H915-1      | Gene ID of 513.88 |
|------------------------|-------------------|
| evm.model.unitig_2.49  | An01g14650        |
| evm.model.unitig_2.490 | An01g08600        |
| evm.model.unitig_2.491 | An01g08590        |
| evm.model.unitig_2.492 | An01g08580        |
| evm.model.unitig_2.493 | An01g08570        |
| evm.model.unitig_2.494 | An01g08560        |
| evm.model.unitig_2.495 | An01g08550        |
| evm.model.unitig_2.496 | An01g08540        |
| evm.model.unitig_2.497 | An01g08530        |
| evm.model.unitig_2.498 | An01g08520        |
| evm.model.unitig_2.499 | An01g08500        |
| evm.model.unitig_2.5   | An12g02770        |
| evm.model.unitig_2.50  | An01g14640        |
| evm.model.unitig_2.500 | An01g08490        |
| evm.model.unitig_2.501 | An01g08470        |
| evm.model.unitig_2.502 | An01g08460        |
| evm.model.unitig_2.503 | An01g08450        |
| evm.model.unitig_2.504 | An01g08440        |
| evm.model.unitig_2.505 | An01g08430        |
| evm.model.unitig_2.506 | An01g08420        |
| evm.model.unitig_2.507 | An01g08410        |
| evm.model.unitig_2.508 | An01g08400        |
| evm.model.unitig_2.509 | An01g08390        |
| evm.model.unitig_2.51  | An01g14620        |
| evm.model.unitig_2.510 | An01g08380        |
| evm.model.unitig_2.511 | An01g08310        |
| evm.model.unitig_2.512 | An01g08280        |
| evm.model.unitig_2.513 | An01g08240        |
| evm.model.unitig_2.514 | An01g08230        |
| evm.model.unitig_2.515 | An01g08220        |
| evm.model.unitig_2.516 | An01g08210        |
| evm.model.unitig_2.517 | An01g08180        |
| evm.model.unitig_2.518 | An01g08170        |
| evm.model.unitig_2.519 | An01g08160        |
| evm.model.unitig_2.52  | An01g14600        |
| evm.model.unitig_2.520 | An01g08150        |
| evm.model.unitig_2.521 | An01g08130        |
| evm.model.unitig_2.522 | An01g08120        |
| evm.model.unitig_2.523 | An01g08110        |
| evm.model.unitig_2.524 | An01g08100        |
| evm.model.unitig_2.525 | An01g08090        |
| evm.model.unitig_2.526 | An01g08080        |
| evm.model.unitig_2.527 | An01g08060        |

---

---

| Gene ID of H915-1      | Gene ID of 513.88 |
|------------------------|-------------------|
| evm.model.unitig_2.528 | An01g08050        |
| evm.model.unitig_2.529 | An01g08040        |
| evm.model.unitig_2.53  | An01g14590        |
| evm.model.unitig_2.530 | An01g08030        |
| evm.model.unitig_2.531 | An01g08020        |
| evm.model.unitig_2.532 | An01g08010        |
| evm.model.unitig_2.533 | An01g08000        |
| evm.model.unitig_2.534 | An01g07990        |
| evm.model.unitig_2.535 | An01g07980        |
| evm.model.unitig_2.536 | An06g02150        |
| evm.model.unitig_2.537 | An01g11330        |
| evm.model.unitig_2.538 | An11g07050        |
| evm.model.unitig_2.539 | An01g07950        |
| evm.model.unitig_2.54  | An01g14560        |
| evm.model.unitig_2.540 | An01g07920        |
| evm.model.unitig_2.541 | An01g07910        |
| evm.model.unitig_2.543 | An01g07870        |
| evm.model.unitig_2.544 | An01g07860        |
| evm.model.unitig_2.545 | An01g07850        |
| evm.model.unitig_2.546 | An01g07840        |
| evm.model.unitig_2.547 | An01g07830        |
| evm.model.unitig_2.548 | An01g07820        |
| evm.model.unitig_2.549 | An01g07810        |
| evm.model.unitig_2.550 | An01g07790        |
| evm.model.unitig_2.551 | An01g07770        |
| evm.model.unitig_2.552 | An01g07760        |
| evm.model.unitig_2.553 | An01g07750        |
| evm.model.unitig_2.554 | An09g02340        |
| evm.model.unitig_2.555 | An01g07720        |
| evm.model.unitig_2.556 | An01g07700        |
| evm.model.unitig_2.557 | An01g07680        |
| evm.model.unitig_2.558 | An01g07660        |
| evm.model.unitig_2.559 | An01g07650        |
| evm.model.unitig_2.56  | An01g14550        |
| evm.model.unitig_2.560 | An01g07640        |
| evm.model.unitig_2.561 | An01g07630        |
| evm.model.unitig_2.562 | An01g07600        |
| evm.model.unitig_2.563 | An01g07590        |
| evm.model.unitig_2.564 | An01g07580        |
| evm.model.unitig_2.565 | An01g07570        |
| evm.model.unitig_2.566 | An01g07550        |
| evm.model.unitig_2.567 | An01g07530        |
| evm.model.unitig_2.568 | An01g07520        |

---

---

| Gene ID of H915-1      | Gene ID of 513.88 |
|------------------------|-------------------|
| evm.model.unitig_2.569 | An01g07510        |
| evm.model.unitig_2.57  | An01g14540        |
| evm.model.unitig_2.570 | An01g07500        |
| evm.model.unitig_2.571 | An01g07480        |
| evm.model.unitig_2.572 | An01g07470        |
| evm.model.unitig_2.573 | An01g07460        |
| evm.model.unitig_2.574 | An12g02210        |
| evm.model.unitig_2.575 | An01g07430        |
| evm.model.unitig_2.576 | An01g07420        |
| evm.model.unitig_2.577 | An01g07400        |
| evm.model.unitig_2.578 | An01g07390        |
| evm.model.unitig_2.579 | An01g07380        |
| evm.model.unitig_2.58  | An01g14540        |
| evm.model.unitig_2.580 | An01g07370        |
| evm.model.unitig_2.581 | An01g07360        |
| evm.model.unitig_2.582 | An01g07350        |
| evm.model.unitig_2.583 | An01g07330        |
| evm.model.unitig_2.584 | An01g07320        |
| evm.model.unitig_2.585 | An01g07300        |
| evm.model.unitig_2.586 | An01g07290        |
| evm.model.unitig_2.587 | An01g07280        |
| evm.model.unitig_2.588 | An01g07270        |
| evm.model.unitig_2.589 | An01g07260        |
| evm.model.unitig_2.59  | An01g14520        |
| evm.model.unitig_2.590 | An01g07240        |
| evm.model.unitig_2.591 | An01g07230        |
| evm.model.unitig_2.592 | An01g07220        |
| evm.model.unitig_2.593 | An01g07200        |
| evm.model.unitig_2.594 | An01g07190        |
| evm.model.unitig_2.595 | An01g07180        |
| evm.model.unitig_2.596 | An01g07170        |
| evm.model.unitig_2.597 | An01g07160        |
| evm.model.unitig_2.598 | An01g07150        |
| evm.model.unitig_2.599 | An01g07140        |
| evm.model.unitig_2.60  | An01g14510        |
| evm.model.unitig_2.600 | An01g07110        |
| evm.model.unitig_2.601 | An01g07090        |
| evm.model.unitig_2.602 | An01g07080        |
| evm.model.unitig_2.603 | -                 |
| evm.model.unitig_2.604 | An01g07060        |
| evm.model.unitig_2.605 | An01g07050        |
| evm.model.unitig_2.606 | An01g07040        |
| evm.model.unitig_2.607 | An01g07030        |

---

---

| Gene ID of H915-1      | Gene ID of 513.88 |
|------------------------|-------------------|
| evm.model.unitig_2.608 | An01g07025        |
| evm.model.unitig_2.609 | An01g07010        |
| evm.model.unitig_2.610 | An01g07000        |
| evm.model.unitig_2.611 | An01g06990        |
| evm.model.unitig_2.612 | An01g06970        |
| evm.model.unitig_2.613 | An01g06960        |
| evm.model.unitig_2.614 | An01g06930        |
| evm.model.unitig_2.615 | An01g06930        |
| evm.model.unitig_2.616 | An01g06920        |
| evm.model.unitig_2.617 | An01g06910        |
| evm.model.unitig_2.618 | An01g06880        |
| evm.model.unitig_2.619 | An01g06870        |
| evm.model.unitig_2.62  | An01g14480        |
| evm.model.unitig_2.620 | An01g06860        |
| evm.model.unitig_2.621 | An01g06850        |
| evm.model.unitig_2.622 | An01g06830        |
| evm.model.unitig_2.623 | An01g06820        |
| evm.model.unitig_2.624 | An01g06810        |
| evm.model.unitig_2.625 | An01g06800        |
| evm.model.unitig_2.627 | An01g06790        |
| evm.model.unitig_2.628 | An01g06780        |
| evm.model.unitig_2.629 | An01g06770        |
| evm.model.unitig_2.63  | An01g14450        |
| evm.model.unitig_2.630 | An08g03810        |
| evm.model.unitig_2.631 | An01g06750        |
| evm.model.unitig_2.633 | An01g06710        |
| evm.model.unitig_2.634 | An01g06690        |
| evm.model.unitig_2.635 | An01g06670        |
| evm.model.unitig_2.636 | An01g06660        |
| evm.model.unitig_2.637 | An01g06650        |
| evm.model.unitig_2.638 | An01g06640        |
| evm.model.unitig_2.639 | An01g06630        |
| evm.model.unitig_2.64  | An01g14430        |
| evm.model.unitig_2.640 | An01g06620        |
| evm.model.unitig_2.641 | An01g06610        |
| evm.model.unitig_2.642 | An01g06570        |
| evm.model.unitig_2.643 | An01g06560        |
| evm.model.unitig_2.644 | An01g06550        |
| evm.model.unitig_2.645 | An01g06530        |
| evm.model.unitig_2.646 | An01g06520        |
| evm.model.unitig_2.647 | An01g06500        |
| evm.model.unitig_2.648 | An01g06480        |
| evm.model.unitig_2.649 | An01g06470        |

---

---

| Gene ID of H915-1      | Gene ID of 513.88 |
|------------------------|-------------------|
| evm.model.unitig_2.65  | An01g14420        |
| evm.model.unitig_2.650 | An01g06460        |
| evm.model.unitig_2.651 | An01g06440        |
| evm.model.unitig_2.652 | An01g06420        |
| evm.model.unitig_2.653 | An01g06410        |
| evm.model.unitig_2.654 | An01g06400        |
| evm.model.unitig_2.655 | An01g06390        |
| evm.model.unitig_2.656 | An01g06380        |
| evm.model.unitig_2.657 | An01g06370        |
| evm.model.unitig_2.658 | An01g06360        |
| evm.model.unitig_2.659 | An01g06350        |
| evm.model.unitig_2.66  | An01g14410        |
| evm.model.unitig_2.660 | An01g06340        |
| evm.model.unitig_2.661 | An01g06330        |
| evm.model.unitig_2.662 | An01g06310        |
| evm.model.unitig_2.663 | An01g06290        |
| evm.model.unitig_2.664 | An01g06280        |
| evm.model.unitig_2.665 | An01g06270        |
| evm.model.unitig_2.666 | An01g06260        |
| evm.model.unitig_2.667 | An01g06250        |
| evm.model.unitig_2.668 | An01g06240        |
| evm.model.unitig_2.669 | An01g06230        |
| evm.model.unitig_2.67  | An01g14400        |
| evm.model.unitig_2.670 | An08g05010        |
| evm.model.unitig_2.671 | An01g06210        |
| evm.model.unitig_2.672 | An01g06190        |
| evm.model.unitig_2.673 | An01g06180        |
| evm.model.unitig_2.674 | An01g06170        |
| evm.model.unitig_2.675 | An01g06150        |
| evm.model.unitig_2.676 | An01g06120        |
| evm.model.unitig_2.677 | An01g06120        |
| evm.model.unitig_2.678 | An01g06110        |
| evm.model.unitig_2.679 | An01g06080        |
| evm.model.unitig_2.68  | An01g14390        |
| evm.model.unitig_2.680 | An01g06080        |
| evm.model.unitig_2.681 | An01g06070        |
| evm.model.unitig_2.682 | An01g06060        |
| evm.model.unitig_2.683 | An01g06050        |
| evm.model.unitig_2.684 | An01g06040        |
| evm.model.unitig_2.685 | An01g06030        |
| evm.model.unitig_2.686 | An01g06020        |
| evm.model.unitig_2.687 | An01g06010        |
| evm.model.unitig_2.688 | An01g05990        |

---

---

| Gene ID of H915-1      | Gene ID of 513.88 |
|------------------------|-------------------|
| evm.model.unitig_2.689 | An01g05970        |
| evm.model.unitig_2.69  | An01g14380        |
| evm.model.unitig_2.690 | An01g05960        |
| evm.model.unitig_2.691 | An01g05920        |
| evm.model.unitig_2.692 | An01g05900        |
| evm.model.unitig_2.693 | An01g05890        |
| evm.model.unitig_2.694 | An01g05860        |
| evm.model.unitig_2.695 | An01g05850        |
| evm.model.unitig_2.696 | An01g05840        |
| evm.model.unitig_2.697 | An03g04730        |
| evm.model.unitig_2.698 | An01g05830        |
| evm.model.unitig_2.699 | An01g05820        |
| evm.model.unitig_2.7   | An01g15140        |
| evm.model.unitig_2.70  | An01g14380        |
| evm.model.unitig_2.700 | An01g05810        |
| evm.model.unitig_2.701 | An01g05800        |
| evm.model.unitig_2.702 | An01g05790        |
| evm.model.unitig_2.703 | An01g05780        |
| evm.model.unitig_2.704 | An01g05770        |
| evm.model.unitig_2.705 | An01g05760        |
| evm.model.unitig_2.706 | An01g05750        |
| evm.model.unitig_2.707 | An01g05740        |
| evm.model.unitig_2.708 | An01g05700        |
| evm.model.unitig_2.709 | An01g05680        |
| evm.model.unitig_2.71  | An01g14360        |
| evm.model.unitig_2.710 | An01g05670        |
| evm.model.unitig_2.711 | An01g05660        |
| evm.model.unitig_2.712 | An01g05650        |
| evm.model.unitig_2.713 | An01g05640        |
| evm.model.unitig_2.714 | An01g05630        |
| evm.model.unitig_2.715 | An01g05620        |
| evm.model.unitig_2.716 | An01g05610        |
| evm.model.unitig_2.717 | An01g05600        |
| evm.model.unitig_2.718 | An01g05580        |
| evm.model.unitig_2.719 | An01g05570        |
| evm.model.unitig_2.72  | An01g14330        |
| evm.model.unitig_2.720 | An01g05540        |
| evm.model.unitig_2.721 | -                 |
| evm.model.unitig_2.722 | An01g05510        |
| evm.model.unitig_2.723 | An01g05500        |
| evm.model.unitig_2.724 | An01g05470        |
| evm.model.unitig_2.725 | An01g05410        |
| evm.model.unitig_2.726 | An01g05390        |

---

---

| Gene ID of H915-1      | Gene ID of 513.88 |
|------------------------|-------------------|
| evm.model.unitig_2.727 | An01g05370        |
| evm.model.unitig_2.728 | An01g05360        |
| evm.model.unitig_2.73  | An01g14310        |
| evm.model.unitig_2.730 | An01g05350        |
| evm.model.unitig_2.731 | An01g05340        |
| evm.model.unitig_2.732 | An01g05330        |
| evm.model.unitig_2.733 | An01g05320        |
| evm.model.unitig_2.734 | An01g05310        |
| evm.model.unitig_2.735 | An01g05300        |
| evm.model.unitig_2.736 | -                 |
| evm.model.unitig_2.737 | An01g05290        |
| evm.model.unitig_2.738 | An01g05280        |
| evm.model.unitig_2.739 | An01g05270        |
| evm.model.unitig_2.74  | An01g14290        |
| evm.model.unitig_2.740 | An01g05260        |
| evm.model.unitig_2.741 | An01g05230        |
| evm.model.unitig_2.742 | An01g05220        |
| evm.model.unitig_2.743 | An01g05190        |
| evm.model.unitig_2.744 | -                 |
| evm.model.unitig_2.745 | An01g05180        |
| evm.model.unitig_2.746 | An01g05160        |
| evm.model.unitig_2.747 | An01g05150        |
| evm.model.unitig_2.748 | An01g05100        |
| evm.model.unitig_2.749 | An01g05090        |
| evm.model.unitig_2.75  | An01g14280        |
| evm.model.unitig_2.750 | An01g05080        |
| evm.model.unitig_2.751 | An01g05070        |
| evm.model.unitig_2.752 | An01g05060        |
| evm.model.unitig_2.753 | An01g05050        |
| evm.model.unitig_2.754 | An01g05040        |
| evm.model.unitig_2.755 | An01g05030        |
| evm.model.unitig_2.756 | An01g04990        |
| evm.model.unitig_2.757 | An01g04980        |
| evm.model.unitig_2.758 | An01g04970        |
| evm.model.unitig_2.759 | An01g04950        |
| evm.model.unitig_2.76  | An01g14250        |
| evm.model.unitig_2.761 | An01g04930        |
| evm.model.unitig_2.762 | An01g04910        |
| evm.model.unitig_2.763 | An01g04900        |
| evm.model.unitig_2.764 | An01g04880        |
| evm.model.unitig_2.765 | An01g04830        |
| evm.model.unitig_2.768 | An01g04760        |
| evm.model.unitig_2.769 | An01g04740        |

---



---

| Gene ID of H915-1      | Gene ID of 513.88 |
|------------------------|-------------------|
| evm.model.unitig_2.77  | An01g14230        |
| evm.model.unitig_2.770 | An01g04730        |
| evm.model.unitig_2.771 | An01g04720        |
| evm.model.unitig_2.772 | An01g04710        |
| evm.model.unitig_2.773 | An01g04700        |
| evm.model.unitig_2.774 | An01g04690        |
| evm.model.unitig_2.775 | An01g04680        |
| evm.model.unitig_2.776 | An01g04670        |
| evm.model.unitig_2.777 | An01g04660        |
| evm.model.unitig_2.778 | An01g04650        |
| evm.model.unitig_2.779 | An01g04640        |
| evm.model.unitig_2.78  | An01g14210        |
| evm.model.unitig_2.780 | An01g04630        |
| evm.model.unitig_2.781 | An01g04620        |
| evm.model.unitig_2.782 | An01g04610        |
| evm.model.unitig_2.783 | An01g04600        |
| evm.model.unitig_2.784 | An01g04590        |
| evm.model.unitig_2.785 | An01g04570        |
| evm.model.unitig_2.786 | An01g04560        |
| evm.model.unitig_2.787 | An01g04550        |
| evm.model.unitig_2.788 | An01g04530        |
| evm.model.unitig_2.789 | An01g04520        |
| evm.model.unitig_2.79  | An01g14200        |
| evm.model.unitig_2.790 | An01g04470        |
| evm.model.unitig_2.792 | An01g04450        |
| evm.model.unitig_2.793 | An01g04440        |
| evm.model.unitig_2.794 | An01g04430        |
| evm.model.unitig_2.795 | An01g04420        |
| evm.model.unitig_2.796 | An01g04410        |
| evm.model.unitig_2.797 | An01g04400        |
| evm.model.unitig_2.798 | An01g04380        |
| evm.model.unitig_2.799 | An01g04370        |
| evm.model.unitig_2.8   | An01g15130        |
| evm.model.unitig_2.80  | An01g14180        |
| evm.model.unitig_2.800 | An01g04360        |
| evm.model.unitig_2.801 | An01g04330        |
| evm.model.unitig_2.802 | An01g04320        |
| evm.model.unitig_2.803 | An01g04310        |
| evm.model.unitig_2.804 | An01g04300        |
| evm.model.unitig_2.805 | An01g04280        |
| evm.model.unitig_2.806 | An01g04260        |
| evm.model.unitig_2.807 | An01g04250        |
| evm.model.unitig_2.808 | An01g04240        |

---

---

| Gene ID of H915-1      | Gene ID of 513.88 |
|------------------------|-------------------|
| evm.model.unitig_2.809 | An01g04230        |
| evm.model.unitig_2.81  | An01g14160        |
| evm.model.unitig_2.810 | An15g04600        |
| evm.model.unitig_2.811 | An01g04100        |
| evm.model.unitig_2.812 | An01g04090        |
| evm.model.unitig_2.813 | An01g04080        |
| evm.model.unitig_2.814 | An01g04060        |
| evm.model.unitig_2.815 | An01g04180        |
| evm.model.unitig_2.816 | An01g04150        |
| evm.model.unitig_2.817 | An12g02980        |
| evm.model.unitig_2.818 | An01g04040        |
| evm.model.unitig_2.819 | An01g04030        |
| evm.model.unitig_2.82  | An01g14140        |
| evm.model.unitig_2.820 | An01g03970        |
| evm.model.unitig_2.821 | An01g03950        |
| evm.model.unitig_2.822 | An15g04620        |
| evm.model.unitig_2.823 | An01g03950        |
| evm.model.unitig_2.824 | An01g03900        |
| evm.model.unitig_2.825 | An01g03870        |
| evm.model.unitig_2.826 | An01g03820        |
| evm.model.unitig_2.827 | An01g03790        |
| evm.model.unitig_2.828 | An01g03780        |
| evm.model.unitig_2.829 | An01g03760        |
| evm.model.unitig_2.83  | An01g14130        |
| evm.model.unitig_2.830 | An01g03750        |
| evm.model.unitig_2.831 | An01g03740        |
| evm.model.unitig_2.832 | An01g03720        |
| evm.model.unitig_2.833 | An01g03700        |
| evm.model.unitig_2.834 | An01g03680        |
| evm.model.unitig_2.835 | An01g03670        |
| evm.model.unitig_2.836 | An01g03660        |
| evm.model.unitig_2.837 | An01g03650        |
| evm.model.unitig_2.838 | An01g03630        |
| evm.model.unitig_2.839 | An01g03610        |
| evm.model.unitig_2.84  | An01g14120        |
| evm.model.unitig_2.840 | An01g03600        |
| evm.model.unitig_2.841 | An01g03590        |
| evm.model.unitig_2.842 | An01g03580        |
| evm.model.unitig_2.843 | An01g03570        |
| evm.model.unitig_2.844 | An01g03560        |
| evm.model.unitig_2.845 | An01g03550        |
| evm.model.unitig_2.846 | An01g03540        |
| evm.model.unitig_2.847 | An01g03530        |

---

---

| Gene ID of H915-1      | Gene ID of 513.88 |
|------------------------|-------------------|
| evm.model.unitig_2.848 | An01g03520        |
| evm.model.unitig_2.849 | An01g03510        |
| evm.model.unitig_2.85  | An01g14110        |
| evm.model.unitig_2.850 | An01g03500        |
| evm.model.unitig_2.851 | An01g03490        |
| evm.model.unitig_2.852 | An01g03480        |
| evm.model.unitig_2.853 | An01g03470        |
| evm.model.unitig_2.854 | An01g03460        |
| evm.model.unitig_2.855 | An01g03450        |
| evm.model.unitig_2.856 | An01g03410        |
| evm.model.unitig_2.857 | An12g05490        |
| evm.model.unitig_2.858 | An01g03390        |
| evm.model.unitig_2.859 | An01g03370        |
| evm.model.unitig_2.86  | An01g14100        |
| evm.model.unitig_2.860 | -                 |
| evm.model.unitig_2.861 | An01g03360        |
| evm.model.unitig_2.862 | An01g03350        |
| evm.model.unitig_2.863 | An01g03340        |
| evm.model.unitig_2.864 | An01g03330        |
| evm.model.unitig_2.865 | An01g03310        |
| evm.model.unitig_2.866 | An01g03300        |
| evm.model.unitig_2.867 | -                 |
| evm.model.unitig_2.868 | An01g03270        |
| evm.model.unitig_2.869 | An01g03250        |
| evm.model.unitig_2.87  | An01g14090        |
| evm.model.unitig_2.870 | An01g03240        |
| evm.model.unitig_2.871 | An01g03230        |
| evm.model.unitig_2.872 | An01g03220        |
| evm.model.unitig_2.873 | An01g03210        |
| evm.model.unitig_2.874 | An01g03190        |
| evm.model.unitig_2.875 | An01g03180        |
| evm.model.unitig_2.876 | An01g03170        |
| evm.model.unitig_2.877 | An01g03160        |
| evm.model.unitig_2.878 | An01g03150        |
| evm.model.unitig_2.879 | An01g03140        |
| evm.model.unitig_2.88  | An01g14080        |
| evm.model.unitig_2.880 | An01g03130        |
| evm.model.unitig_2.881 | An01g03120        |
| evm.model.unitig_2.882 | An01g03100        |
| evm.model.unitig_2.883 | An01g03090        |
| evm.model.unitig_2.884 | An01g03080        |
| evm.model.unitig_2.885 | An01g03070        |
| evm.model.unitig_2.886 | An01g03060        |

---

---

| Gene ID of H915-1      | Gene ID of 513.88 |
|------------------------|-------------------|
| evm.model.unitig_2.887 | An01g03050        |
| evm.model.unitig_2.888 | An01g03040        |
| evm.model.unitig_2.889 | An01g03030        |
| evm.model.unitig_2.89  | An01g14070        |
| evm.model.unitig_2.890 | An01g03000        |
| evm.model.unitig_2.891 | An01g02990        |
| evm.model.unitig_2.892 | An04g00410        |
| evm.model.unitig_2.893 | An01g02970        |
| evm.model.unitig_2.894 | An01g02960        |
| evm.model.unitig_2.895 | An01g02950        |
| evm.model.unitig_2.896 | An01g02940        |
| evm.model.unitig_2.897 | An01g02930        |
| evm.model.unitig_2.898 | An01g02910        |
| evm.model.unitig_2.899 | An01g02900        |
| evm.model.unitig_2.9   | -                 |
| evm.model.unitig_2.90  | An01g14050        |
| evm.model.unitig_2.900 | An01g02890        |
| evm.model.unitig_2.901 | An01g02870        |
| evm.model.unitig_2.902 | An01g02860        |
| evm.model.unitig_2.903 | An01g02850        |
| evm.model.unitig_2.904 | An01g02840        |
| evm.model.unitig_2.905 | An01g02830        |
| evm.model.unitig_2.906 | An01g02810        |
| evm.model.unitig_2.907 | An01g02800        |
| evm.model.unitig_2.908 | An01g02790        |
| evm.model.unitig_2.909 | An01g02760        |
| evm.model.unitig_2.91  | An01g14040        |
| evm.model.unitig_2.910 | An15g03540        |
| evm.model.unitig_2.911 | An01g02740        |
| evm.model.unitig_2.912 | An01g02730        |
| evm.model.unitig_2.913 | An01g02720        |
| evm.model.unitig_2.914 | An01g02700        |
| evm.model.unitig_2.915 | An01g02690        |
| evm.model.unitig_2.916 | An01g02680        |
| evm.model.unitig_2.917 | An01g02670        |
| evm.model.unitig_2.918 | An01g02660        |
| evm.model.unitig_2.919 | An03g05810        |
| evm.model.unitig_2.92  | An01g14030        |
| evm.model.unitig_2.920 | An01g02640        |
| evm.model.unitig_2.921 | An01g02630        |
| evm.model.unitig_2.922 | An01g02620        |
| evm.model.unitig_2.923 | An01g02600        |
| evm.model.unitig_2.924 | An01g02510        |

---

---

| Gene ID of H915-1      | Gene ID of 513.88 |
|------------------------|-------------------|
| evm.model.unitig_2.925 | An01g02500        |
| evm.model.unitig_2.926 | An01g02460        |
| evm.model.unitig_2.927 | An01g02440        |
| evm.model.unitig_2.928 | An01g02430        |
| evm.model.unitig_2.929 | An01g02420        |
| evm.model.unitig_2.93  | An01g14020        |
| evm.model.unitig_2.930 | An01g02410        |
| evm.model.unitig_2.931 | An01g02370        |
| evm.model.unitig_2.932 | An01g02360        |
| evm.model.unitig_2.933 | An01g02340        |
| evm.model.unitig_2.934 | An01g02330        |
| evm.model.unitig_2.935 | An01g02320        |
| evm.model.unitig_2.936 | An01g02310        |
| evm.model.unitig_2.937 | An01g02280        |
| evm.model.unitig_2.939 | An01g02260        |
| evm.model.unitig_2.94  | An01g14010        |
| evm.model.unitig_2.940 | An01g02250        |
| evm.model.unitig_2.941 | An01g02240        |
| evm.model.unitig_2.942 | An01g02230        |
| evm.model.unitig_2.943 | An01g02220        |
| evm.model.unitig_2.944 | An01g02210        |
| evm.model.unitig_2.945 | An01g02200        |
| evm.model.unitig_2.946 | An01g02190        |
| evm.model.unitig_2.947 | An01g02180        |
| evm.model.unitig_2.948 | An01g02170        |
| evm.model.unitig_2.949 | An01g02160        |
| evm.model.unitig_2.95  | An18g01460        |
| evm.model.unitig_2.950 | An01g02150        |
| evm.model.unitig_2.951 | An01g02140        |
| evm.model.unitig_2.952 | An01g02140        |
| evm.model.unitig_2.953 | An02g06470        |
| evm.model.unitig_2.954 | An01g02120        |
| evm.model.unitig_2.955 | An01g02110        |
| evm.model.unitig_2.956 | An01g02100        |
| evm.model.unitig_2.957 | An01g02090        |
| evm.model.unitig_2.958 | An01g02080        |
| evm.model.unitig_2.959 | An01g02070        |
| evm.model.unitig_2.96  | An01g14000        |
| evm.model.unitig_2.960 | An01g02060        |
| evm.model.unitig_2.961 | An01g02050        |
| evm.model.unitig_2.964 | An09g01290        |
| evm.model.unitig_2.965 | An09g05340        |
| evm.model.unitig_2.967 | An01g02000        |

---

---

| Gene ID of H915-1       | Gene ID of 513.88 |
|-------------------------|-------------------|
| evm.model.unitig_2.968  | An01g01980        |
| evm.model.unitig_2.970  | An01g01960        |
| evm.model.unitig_2.971  | An01g01950        |
| evm.model.unitig_2.972  | An01g01940        |
| evm.model.unitig_2.974  | An01g01920        |
| evm.model.unitig_2.975  | An01g01900        |
| evm.model.unitig_2.976  | An01g01880        |
| evm.model.unitig_2.977  | An01g01870        |
| evm.model.unitig_2.978  | -                 |
| evm.model.unitig_2.979  | An01g01850        |
| evm.model.unitig_2.98   | An01g13960        |
| evm.model.unitig_2.980  | An01g01840        |
| evm.model.unitig_2.981  | An01g01830        |
| evm.model.unitig_2.982  | An01g01820        |
| evm.model.unitig_2.983  | An01g01810        |
| evm.model.unitig_2.984  | An01g01800        |
| evm.model.unitig_2.985  | An01g01790        |
| evm.model.unitig_2.986  | An01g01780        |
| evm.model.unitig_2.987  | An01g01750        |
| evm.model.unitig_2.988  | An01g01720        |
| evm.model.unitig_2.989  | An01g01670        |
| evm.model.unitig_2.99   | An01g13950        |
| evm.model.unitig_2.990  | An01g01640        |
| evm.model.unitig_2.991  | An01g01620        |
| evm.model.unitig_2.992  | An01g01600        |
| evm.model.unitig_2.993  | An01g01580        |
| evm.model.unitig_2.994  | An01g01560        |
| evm.model.unitig_2.995  | An01g01550        |
| evm.model.unitig_2.996  | An01g01540        |
| evm.model.unitig_2.997  | An01g01530        |
| evm.model.unitig_2.998  | An01g01520        |
| evm.model.unitig_2.999  | An01g01500        |
| evm.model.unitig_3.1    | An05g02540        |
| evm.model.unitig_3.10   | An05g02450        |
| evm.model.unitig_3.100  | An05g01160        |
| evm.model.unitig_3.1000 | An11g02440        |
| evm.model.unitig_3.1001 | An11g02430        |
| evm.model.unitig_3.1002 | An11g02400        |
| evm.model.unitig_3.1003 | An11g02390        |
| evm.model.unitig_3.1004 | An11g02380        |
| evm.model.unitig_3.1005 | -                 |
| evm.model.unitig_3.1006 | -                 |
| evm.model.unitig_3.1007 | -                 |

---

---

| Gene ID of H915-1       | Gene ID of 513.88 |
|-------------------------|-------------------|
| evm.model.unitig_3.1008 | -                 |
| evm.model.unitig_3.1009 | An11g02370        |
| evm.model.unitig_3.101  | An05g01170        |
| evm.model.unitig_3.1010 | An11g02370        |
| evm.model.unitig_3.1012 | -                 |
| evm.model.unitig_3.1013 | An11g02360        |
| evm.model.unitig_3.1014 | -                 |
| evm.model.unitig_3.1015 | An11g02270        |
| evm.model.unitig_3.1016 | An11g02230        |
| evm.model.unitig_3.1017 | An11g02220        |
| evm.model.unitig_3.1018 | An11g02200        |
| evm.model.unitig_3.1019 | An11g02190        |
| evm.model.unitig_3.102  | An05g01200        |
| evm.model.unitig_3.1020 | An11g02180        |
| evm.model.unitig_3.1021 | An11g02170        |
| evm.model.unitig_3.1022 | An11g02160        |
| evm.model.unitig_3.1023 | An11g02150        |
| evm.model.unitig_3.1024 | An11g02140        |
| evm.model.unitig_3.1025 | An11g02120        |
| evm.model.unitig_3.1026 | An11g02110        |
| evm.model.unitig_3.1027 | An11g02100        |
| evm.model.unitig_3.1028 | -                 |
| evm.model.unitig_3.1029 | An11g02090        |
| evm.model.unitig_3.103  | An05g01210        |
| evm.model.unitig_3.1030 | An11g02070        |
| evm.model.unitig_3.1031 | An11g02050        |
| evm.model.unitig_3.1032 | An11g02040        |
| evm.model.unitig_3.1033 | An11g02030        |
| evm.model.unitig_3.1034 | An11g02020        |
| evm.model.unitig_3.1035 | An11g02010        |
| evm.model.unitig_3.1036 | An11g02000        |
| evm.model.unitig_3.1037 | An11g01990        |
| evm.model.unitig_3.1038 | An11g01980        |
| evm.model.unitig_3.1039 | An11g01970        |
| evm.model.unitig_3.104  | An06g00680        |
| evm.model.unitig_3.1040 | An11g01960        |
| evm.model.unitig_3.1041 | An11g01950        |
| evm.model.unitig_3.1042 | An11g01940        |
| evm.model.unitig_3.1043 | An11g05660        |
| evm.model.unitig_3.1044 | An11g01890        |
| evm.model.unitig_3.1045 | An11g01880        |
| evm.model.unitig_3.1046 | An11g01870        |
| evm.model.unitig_3.1047 | An11g01860        |

---

---

| Gene ID of H915-1       | Gene ID of 513.88 |
|-------------------------|-------------------|
| evm.model.unitig_3.1048 | An11g01850        |
| evm.model.unitig_3.1049 | An11g01840        |
| evm.model.unitig_3.1050 | An11g01830        |
| evm.model.unitig_3.1051 | An11g01810        |
| evm.model.unitig_3.1052 | An11g01790        |
| evm.model.unitig_3.1053 | An11g01770        |
| evm.model.unitig_3.1054 | An11g01760        |
| evm.model.unitig_3.1055 | An11g01750        |
| evm.model.unitig_3.1056 | An11g01740        |
| evm.model.unitig_3.1057 | An11g01720        |
| evm.model.unitig_3.1058 | An11g01700        |
| evm.model.unitig_3.1059 | An11g01660        |
| evm.model.unitig_3.1060 | An11g01650        |
| evm.model.unitig_3.1061 | An11g01640        |
| evm.model.unitig_3.1062 | An11g01630        |
| evm.model.unitig_3.1063 | An11g01610        |
| evm.model.unitig_3.1064 | An11g01600        |
| evm.model.unitig_3.1065 | An11g01580        |
| evm.model.unitig_3.1066 | An11g01570        |
| evm.model.unitig_3.1067 | An11g01550        |
| evm.model.unitig_3.1068 | An11g01540        |
| evm.model.unitig_3.1069 | An11g01520        |
| evm.model.unitig_3.1070 | An11g01510        |
| evm.model.unitig_3.1071 | An12g00830        |
| evm.model.unitig_3.1072 | An11g01430        |
| evm.model.unitig_3.1073 | An11g01420        |
| evm.model.unitig_3.1074 | An11g01410        |
| evm.model.unitig_3.1075 | An11g01400        |
| evm.model.unitig_3.1076 | An11g01390        |
| evm.model.unitig_3.1077 | An11g01380        |
| evm.model.unitig_3.1078 | An11g01350        |
| evm.model.unitig_3.1079 | An11g01340        |
| evm.model.unitig_3.1080 | An11g01330        |
| evm.model.unitig_3.1081 | An11g01310        |
| evm.model.unitig_3.1082 | An11g01300        |
| evm.model.unitig_3.1083 | An11g01270        |
| evm.model.unitig_3.1084 | An11g01260        |
| evm.model.unitig_3.1085 | An13g02410        |
| evm.model.unitig_3.1086 | An11g01250        |
| evm.model.unitig_3.1087 | An11g01240        |
| evm.model.unitig_3.1088 | An11g01220        |
| evm.model.unitig_3.1089 | An11g01200        |
| evm.model.unitig_3.109  | An05g01270        |

---



---

| Gene ID of H915-1       | Gene ID of 513.88 |
|-------------------------|-------------------|
| evm.model.unitig_3.1090 | An11g01190        |
| evm.model.unitig_3.1091 | An11g01180        |
| evm.model.unitig_3.1092 | An08g09030        |
| evm.model.unitig_3.1093 | An11g01150        |
| evm.model.unitig_3.1094 | An11g01140        |
| evm.model.unitig_3.1095 | An11g01140        |
| evm.model.unitig_3.1096 | An11g01120        |
| evm.model.unitig_3.1097 | An11g01110        |
| evm.model.unitig_3.1098 | An11g01100        |
| evm.model.unitig_3.1099 | An11g01080        |
| evm.model.unitig_3.11   | An05g02440        |
| evm.model.unitig_3.110  | An05g01290        |
| evm.model.unitig_3.1100 | An11g01070        |
| evm.model.unitig_3.1101 | An11g01060        |
| evm.model.unitig_3.1102 | An11g01040        |
| evm.model.unitig_3.1103 | An11g01000        |
| evm.model.unitig_3.1104 | An11g00990        |
| evm.model.unitig_3.1105 | An11g00970        |
| evm.model.unitig_3.1106 | An11g00960        |
| evm.model.unitig_3.1107 | An15g05650        |
| evm.model.unitig_3.1108 | An11g00940        |
| evm.model.unitig_3.1109 | An11g00930        |
| evm.model.unitig_3.111  | An05g01320        |
| evm.model.unitig_3.1110 | An11g00920        |
| evm.model.unitig_3.1111 | An11g00910        |
| evm.model.unitig_3.1112 | An11g00890        |
| evm.model.unitig_3.1113 | An11g00870        |
| evm.model.unitig_3.1114 | An11g00860        |
| evm.model.unitig_3.1115 | -                 |
| evm.model.unitig_3.1116 | An11g00840        |
| evm.model.unitig_3.1117 | An11g00830        |
| evm.model.unitig_3.1118 | An11g00810        |
| evm.model.unitig_3.1119 | An11g00800        |
| evm.model.unitig_3.112  | An05g01330        |
| evm.model.unitig_3.1120 | An11g00790        |
| evm.model.unitig_3.1121 | An11g00780        |
| evm.model.unitig_3.1122 | An11g00770        |
| evm.model.unitig_3.1123 | An11g00760        |
| evm.model.unitig_3.1124 | -                 |
| evm.model.unitig_3.1125 | An11g00750        |
| evm.model.unitig_3.1126 | An11g00740        |
| evm.model.unitig_3.1127 | -                 |
| evm.model.unitig_3.1128 | -                 |

---

---

| Gene ID of H915-1       | Gene ID of 513.88 |
|-------------------------|-------------------|
| evm.model.unitig_3.1129 | An11g00690        |
| evm.model.unitig_3.113  | An05g01340        |
| evm.model.unitig_3.1130 | An11g00680        |
| evm.model.unitig_3.1131 | An11g00670        |
| evm.model.unitig_3.1132 | An11g00660        |
| evm.model.unitig_3.1133 | An11g00650        |
| evm.model.unitig_3.1134 | An11g00640        |
| evm.model.unitig_3.1135 | An11g00630        |
| evm.model.unitig_3.1136 | An11g00620        |
| evm.model.unitig_3.1137 | An11g00610        |
| evm.model.unitig_3.1138 | An11g00600        |
| evm.model.unitig_3.1139 | An11g00590        |
| evm.model.unitig_3.114  | An05g01350        |
| evm.model.unitig_3.1140 | An11g00580        |
| evm.model.unitig_3.1141 | An11g00570        |
| evm.model.unitig_3.1142 | -                 |
| evm.model.unitig_3.1143 | -                 |
| evm.model.unitig_3.1144 | An11g00530        |
| evm.model.unitig_3.1145 | An11g00510        |
| evm.model.unitig_3.1146 | An11g00500        |
| evm.model.unitig_3.1147 | An11g00490        |
| evm.model.unitig_3.1148 | An11g00480        |
| evm.model.unitig_3.1149 | An11g00470        |
| evm.model.unitig_3.115  | An12g03460        |
| evm.model.unitig_3.1150 | An11g00460        |
| evm.model.unitig_3.1151 | An11g00450        |
| evm.model.unitig_3.1152 | An11g00440        |
| evm.model.unitig_3.1153 | An11g00430        |
| evm.model.unitig_3.1154 | An11g00420        |
| evm.model.unitig_3.1155 | An11g00410        |
| evm.model.unitig_3.1156 | An11g00400        |
| evm.model.unitig_3.1157 | An11g00390        |
| evm.model.unitig_3.1158 | An11g00380        |
| evm.model.unitig_3.1159 | An11g00370        |
| evm.model.unitig_3.116  | An12g03440        |
| evm.model.unitig_3.1160 | An11g00350        |
| evm.model.unitig_3.1161 | An11g00310        |
| evm.model.unitig_3.1162 | An11g00300        |
| evm.model.unitig_3.1163 | An11g00300        |
| evm.model.unitig_3.1164 | An11g00280        |
| evm.model.unitig_3.1165 | An11g00260        |
| evm.model.unitig_3.1166 | An11g00220        |
| evm.model.unitig_3.1167 | An11g00210        |

---

---

| Gene ID of H915-1       | Gene ID of 513.88 |
|-------------------------|-------------------|
| evm.model.unitig_3.1168 | An11g00200        |
| evm.model.unitig_3.1169 | An12g05820        |
| evm.model.unitig_3.1170 | An11g00130        |
| evm.model.unitig_3.1171 | An11g00120        |
| evm.model.unitig_3.1172 | An11g00110        |
| evm.model.unitig_3.1173 | An11g00100        |
| evm.model.unitig_3.1176 | An11g00070        |
| evm.model.unitig_3.1177 | An11g00070        |
| evm.model.unitig_3.1178 | An11g00060        |
| evm.model.unitig_3.1179 | An11g00050        |
| evm.model.unitig_3.1180 | An11g00040        |
| evm.model.unitig_3.1182 | An04g02910        |
| evm.model.unitig_3.1183 | An04g02930        |
| evm.model.unitig_3.1184 | An12g01730        |
| evm.model.unitig_3.1185 | An09g01210        |
| evm.model.unitig_3.1186 | An01g07570        |
| evm.model.unitig_3.1188 | An14g03500        |
| evm.model.unitig_3.119  | An12g03370        |
| evm.model.unitig_3.1190 | An04g02850        |
| evm.model.unitig_3.1191 | An16g06580        |
| evm.model.unitig_3.1192 | An07g05640        |
| evm.model.unitig_3.1193 | An11g09490        |
| evm.model.unitig_3.1195 | An15g00840        |
| evm.model.unitig_3.1196 | An09g03770        |
| evm.model.unitig_3.12   | An05g02420        |
| evm.model.unitig_3.121  | An12g03310        |
| evm.model.unitig_3.122  | An12g03300        |
| evm.model.unitig_3.123  | An12g03290        |
| evm.model.unitig_3.124  | An12g03280        |
| evm.model.unitig_3.125  | An12g03270        |
| evm.model.unitig_3.126  | An12g03260        |
| evm.model.unitig_3.127  | An12g03250        |
| evm.model.unitig_3.128  | An12g03240        |
| evm.model.unitig_3.129  | An12g03230        |
| evm.model.unitig_3.13   | An05g02410        |
| evm.model.unitig_3.130  | An12g03220        |
| evm.model.unitig_3.131  | An12g03210        |
| evm.model.unitig_3.132  | -                 |
| evm.model.unitig_3.133  | An12g03200        |
| evm.model.unitig_3.134  | An12g03190        |
| evm.model.unitig_3.135  | An12g03180        |
| evm.model.unitig_3.136  | An12g03170        |
| evm.model.unitig_3.137  | An12g03160        |

---

---

| Gene ID of H915-1      | Gene ID of 513.88 |
|------------------------|-------------------|
| evm.model.unitig_3.138 | An12g03150        |
| evm.model.unitig_3.139 | An12g03140        |
| evm.model.unitig_3.14  | An05g02400        |
| evm.model.unitig_3.140 | An12g03130        |
| evm.model.unitig_3.141 | An12g03120        |
| evm.model.unitig_3.142 | An12g03110        |
| evm.model.unitig_3.143 | An07g01680        |
| evm.model.unitig_3.144 | An12g03070        |
| evm.model.unitig_3.145 | An12g03040        |
| evm.model.unitig_3.146 | An12g02990        |
| evm.model.unitig_3.147 | An12g02970        |
| evm.model.unitig_3.148 | An12g02960        |
| evm.model.unitig_3.149 | An12g02950        |
| evm.model.unitig_3.15  | An05g02390        |
| evm.model.unitig_3.151 | An12g02930        |
| evm.model.unitig_3.152 | An12g02920        |
| evm.model.unitig_3.153 | An12g02900        |
| evm.model.unitig_3.154 | An12g02880        |
| evm.model.unitig_3.155 | An12g02860        |
| evm.model.unitig_3.156 | An12g02850        |
| evm.model.unitig_3.157 | An12g02840        |
| evm.model.unitig_3.158 | An12g02830        |
| evm.model.unitig_3.159 | An12g02810        |
| evm.model.unitig_3.16  | An05g02380        |
| evm.model.unitig_3.160 | An12g02800        |
| evm.model.unitig_3.161 | An12g02790        |
| evm.model.unitig_3.162 | An12g02730        |
| evm.model.unitig_3.163 | An12g02720        |
| evm.model.unitig_3.164 | An12g02700        |
| evm.model.unitig_3.165 | An12g02680        |
| evm.model.unitig_3.166 | An12g02670        |
| evm.model.unitig_3.167 | An12g02670        |
| evm.model.unitig_3.169 | An12g02650        |
| evm.model.unitig_3.17  | An05g02370        |
| evm.model.unitig_3.170 | An12g02640        |
| evm.model.unitig_3.171 | An12g02630        |
| evm.model.unitig_3.172 | An11g09210        |
| evm.model.unitig_3.173 | An16g04840        |
| evm.model.unitig_3.174 | An12g02590        |
| evm.model.unitig_3.175 | An12g02520        |
| evm.model.unitig_3.176 | An12g02510        |
| evm.model.unitig_3.177 | An12g02500        |
| evm.model.unitig_3.178 | An12g02490        |

---

---

| Gene ID of H915-1      | Gene ID of 513.88 |
|------------------------|-------------------|
| evm.model.unitig_3.179 | An12g02480        |
| evm.model.unitig_3.18  | An05g02340        |
| evm.model.unitig_3.180 | An12g02470        |
| evm.model.unitig_3.181 | An12g02460        |
| evm.model.unitig_3.182 | An12g02450        |
| evm.model.unitig_3.183 | An12g02430        |
| evm.model.unitig_3.184 | An12g02420        |
| evm.model.unitig_3.185 | An12g02410        |
| evm.model.unitig_3.186 | An12g02400        |
| evm.model.unitig_3.187 | An09g04980        |
| evm.model.unitig_3.188 | An12g02380        |
| evm.model.unitig_3.189 | An12g02370        |
| evm.model.unitig_3.19  | An05g02330        |
| evm.model.unitig_3.190 | An12g02360        |
| evm.model.unitig_3.191 | An15g00810        |
| evm.model.unitig_3.192 | An12g02340        |
| evm.model.unitig_3.193 | An12g02330        |
| evm.model.unitig_3.194 | An12g02320        |
| evm.model.unitig_3.195 | An12g02300        |
| evm.model.unitig_3.196 | An12g02280        |
| evm.model.unitig_3.197 | An12g02240        |
| evm.model.unitig_3.198 | An12g02220        |
| evm.model.unitig_3.199 | An12g02210        |
| evm.model.unitig_3.2   | An01g00640        |
| evm.model.unitig_3.20  | An05g02320        |
| evm.model.unitig_3.200 | An12g02190        |
| evm.model.unitig_3.201 | An02g09120        |
| evm.model.unitig_3.202 | An15g03830        |
| evm.model.unitig_3.203 | An12g02120        |
| evm.model.unitig_3.204 | An12g02110        |
| evm.model.unitig_3.205 | An12g02100        |
| evm.model.unitig_3.206 | An12g02090        |
| evm.model.unitig_3.207 | An12g02080        |
| evm.model.unitig_3.208 | An12g02060        |
| evm.model.unitig_3.209 | An12g02050        |
| evm.model.unitig_3.21  | An05g02310        |
| evm.model.unitig_3.210 | An12g02040        |
| evm.model.unitig_3.211 | An12g02020        |
| evm.model.unitig_3.212 | An12g02020        |
| evm.model.unitig_3.213 | An12g01990        |
| evm.model.unitig_3.214 | An12g01980        |
| evm.model.unitig_3.215 | An02g09120        |
| evm.model.unitig_3.216 | An12g01960        |

---

---

| Gene ID of H915-1      | Gene ID of 513.88 |
|------------------------|-------------------|
| evm.model.unitig_3.217 | An12g01950        |
| evm.model.unitig_3.218 | An12g01940        |
| evm.model.unitig_3.219 | An12g01930        |
| evm.model.unitig_3.22  | An05g02280        |
| evm.model.unitig_3.220 | An12g01920        |
| evm.model.unitig_3.221 | An12g01910        |
| evm.model.unitig_3.222 | An12g01900        |
| evm.model.unitig_3.223 | An12g01890        |
| evm.model.unitig_3.224 | An12g01880        |
| evm.model.unitig_3.225 | An12g01870        |
| evm.model.unitig_3.226 | An12g01850        |
| evm.model.unitig_3.227 | An16g05190        |
| evm.model.unitig_3.228 | An12g01820        |
| evm.model.unitig_3.229 | An12g01800        |
| evm.model.unitig_3.23  | An05g02270        |
| evm.model.unitig_3.230 | An12g01750        |
| evm.model.unitig_3.231 | An12g01730        |
| evm.model.unitig_3.232 | An12g01710        |
| evm.model.unitig_3.233 | An12g01700        |
| evm.model.unitig_3.234 | An12g01680        |
| evm.model.unitig_3.235 | An12g01670        |
| evm.model.unitig_3.236 | An02g10560        |
| evm.model.unitig_3.237 | An07g05970        |
| evm.model.unitig_3.24  | An05g02260        |
| evm.model.unitig_3.240 | An12g01640        |
| evm.model.unitig_3.241 | An12g01630        |
| evm.model.unitig_3.242 | An12g01620        |
| evm.model.unitig_3.243 | An12g01610        |
| evm.model.unitig_3.244 | An12g01600        |
| evm.model.unitig_3.245 | An12g01590        |
| evm.model.unitig_3.246 | An12g01580        |
| evm.model.unitig_3.247 | An12g01570        |
| evm.model.unitig_3.248 | An12g01560        |
| evm.model.unitig_3.249 | An12g01550        |
| evm.model.unitig_3.25  | An05g02250        |
| evm.model.unitig_3.250 | An12g01540        |
| evm.model.unitig_3.251 | An12g01520        |
| evm.model.unitig_3.252 | An12g01510        |
| evm.model.unitig_3.253 | An12g01500        |
| evm.model.unitig_3.254 | An12g01490        |
| evm.model.unitig_3.255 | An12g01480        |
| evm.model.unitig_3.256 | An12g01470        |
| evm.model.unitig_3.257 | An12g01460        |

---

---

| Gene ID of H915-1      | Gene ID of 513.88 |
|------------------------|-------------------|
| evm.model.unitig_3.259 | An12g01380        |
| evm.model.unitig_3.26  | An11g08510        |
| evm.model.unitig_3.260 | -                 |
| evm.model.unitig_3.261 | An12g01370        |
| evm.model.unitig_3.262 | An12g01360        |
| evm.model.unitig_3.263 | An12g01350        |
| evm.model.unitig_3.264 | An12g01340        |
| evm.model.unitig_3.265 | An12g01330        |
| evm.model.unitig_3.266 | An12g01320        |
| evm.model.unitig_3.267 | An12g01310        |
| evm.model.unitig_3.268 | An18g03620        |
| evm.model.unitig_3.269 | An01g02240        |
| evm.model.unitig_3.27  | An05g02230        |
| evm.model.unitig_3.270 | An12g01280        |
| evm.model.unitig_3.271 | An12g01280        |
| evm.model.unitig_3.272 | An12g01260        |
| evm.model.unitig_3.273 | An12g01250        |
| evm.model.unitig_3.274 | An12g01210        |
| evm.model.unitig_3.275 | An12g01190        |
| evm.model.unitig_3.276 | An12g01180        |
| evm.model.unitig_3.277 | An12g01170        |
| evm.model.unitig_3.278 | An12g01150        |
| evm.model.unitig_3.279 | An12g01140        |
| evm.model.unitig_3.28  | An05g02220        |
| evm.model.unitig_3.280 | An12g01130        |
| evm.model.unitig_3.281 | An12g01110        |
| evm.model.unitig_3.282 | An12g01100        |
| evm.model.unitig_3.283 | An12g01080        |
| evm.model.unitig_3.284 | An12g01070        |
| evm.model.unitig_3.285 | An12g01060        |
| evm.model.unitig_3.286 | An14g07190        |
| evm.model.unitig_3.287 | An12g01040        |
| evm.model.unitig_3.288 | An12g01030        |
| evm.model.unitig_3.289 | An12g01020        |
| evm.model.unitig_3.29  | An05g02210        |
| evm.model.unitig_3.290 | An12g01010        |
| evm.model.unitig_3.291 | An12g01000        |
| evm.model.unitig_3.292 | An12g00980        |
| evm.model.unitig_3.293 | An12g00960        |
| evm.model.unitig_3.294 | An12g00950        |
| evm.model.unitig_3.295 | An12g00940        |
| evm.model.unitig_3.296 | An12g00930        |
| evm.model.unitig_3.297 | An12g00920        |

---

---

| Gene ID of H915-1      | Gene ID of 513.88 |
|------------------------|-------------------|
| evm.model.unitig_3.298 | An12g00910        |
| evm.model.unitig_3.299 | An12g00900        |
| evm.model.unitig_3.30  | An05g02200        |
| evm.model.unitig_3.300 | An12g00890        |
| evm.model.unitig_3.301 | An12g00880        |
| evm.model.unitig_3.302 | An12g00870        |
| evm.model.unitig_3.304 | An12g00840        |
| evm.model.unitig_3.305 | An12g00830        |
| evm.model.unitig_3.306 | An12g00800        |
| evm.model.unitig_3.307 | An12g00790        |
| evm.model.unitig_3.308 | An12g00780        |
| evm.model.unitig_3.309 | An12g00770        |
| evm.model.unitig_3.31  | An05g02190        |
| evm.model.unitig_3.310 | An12g00760        |
| evm.model.unitig_3.311 | An12g00750        |
| evm.model.unitig_3.312 | An12g00730        |
| evm.model.unitig_3.313 | An12g00720        |
| evm.model.unitig_3.314 | An12g00710        |
| evm.model.unitig_3.315 | An12g00700        |
| evm.model.unitig_3.316 | An12g00690        |
| evm.model.unitig_3.317 | -                 |
| evm.model.unitig_3.318 | An12g00680        |
| evm.model.unitig_3.319 | An09g03270        |
| evm.model.unitig_3.32  | An05g02170        |
| evm.model.unitig_3.320 | An12g00670        |
| evm.model.unitig_3.321 | An12g00660        |
| evm.model.unitig_3.322 | An12g00640        |
| evm.model.unitig_3.323 | An12g00630        |
| evm.model.unitig_3.324 | An12g00620        |
| evm.model.unitig_3.325 | An12g00610        |
| evm.model.unitig_3.326 | An12g00600        |
| evm.model.unitig_3.327 | An12g00590        |
| evm.model.unitig_3.328 | An12g00580        |
| evm.model.unitig_3.329 | An12g00570        |
| evm.model.unitig_3.33  | An16g01190        |
| evm.model.unitig_3.330 | An12g00550        |
| evm.model.unitig_3.331 | An12g00530        |
| evm.model.unitig_3.332 | An12g00520        |
| evm.model.unitig_3.333 | An12g00510        |
| evm.model.unitig_3.334 | An12g00500        |
| evm.model.unitig_3.335 | An12g00490        |
| evm.model.unitig_3.336 | An12g00480        |
| evm.model.unitig_3.337 | An12g00470        |

---



---

| Gene ID of H915-1      | Gene ID of 513.88 |
|------------------------|-------------------|
| evm.model.unitig_3.338 | An12g00460        |
| evm.model.unitig_3.339 | An12g00450        |
| evm.model.unitig_3.34  | An03g06670        |
| evm.model.unitig_3.340 | An12g00440        |
| evm.model.unitig_3.341 | An12g00410        |
| evm.model.unitig_3.342 | An12g00400        |
| evm.model.unitig_3.343 | An12g00390        |
| evm.model.unitig_3.344 | An12g00380        |
| evm.model.unitig_3.345 | An12g00370        |
| evm.model.unitig_3.346 | An12g00350        |
| evm.model.unitig_3.347 | An12g00340        |
| evm.model.unitig_3.348 | An12g00330        |
| evm.model.unitig_3.349 | An12g00320        |
| evm.model.unitig_3.35  | An03g01670        |
| evm.model.unitig_3.350 | An12g00260        |
| evm.model.unitig_3.351 | An12g00240        |
| evm.model.unitig_3.352 | An12g00230        |
| evm.model.unitig_3.353 | An12g00220        |
| evm.model.unitig_3.354 | An12g00210        |
| evm.model.unitig_3.355 | An12g00180        |
| evm.model.unitig_3.356 | An12g00170        |
| evm.model.unitig_3.357 | An12g00160        |
| evm.model.unitig_3.358 | -                 |
| evm.model.unitig_3.359 | An12g00130        |
| evm.model.unitig_3.36  | An05g02080        |
| evm.model.unitig_3.360 | An12g00120        |
| evm.model.unitig_3.361 | An12g00060        |
| evm.model.unitig_3.362 | An12g00050        |
| evm.model.unitig_3.363 | An12g00030        |
| evm.model.unitig_3.364 | An12g00020        |
| evm.model.unitig_3.368 | An18g03700        |
| evm.model.unitig_3.37  | An05g02070        |
| evm.model.unitig_3.370 | An11g11320        |
| evm.model.unitig_3.371 | An11g11310        |
| evm.model.unitig_3.372 | An11g11300        |
| evm.model.unitig_3.373 | An11g11280        |
| evm.model.unitig_3.375 | An11g11260        |
| evm.model.unitig_3.376 | An11g11250        |
| evm.model.unitig_3.377 | An11g11240        |
| evm.model.unitig_3.378 | An11g11230        |
| evm.model.unitig_3.379 | An11g11210        |
| evm.model.unitig_3.38  | An05g02060        |
| evm.model.unitig_3.380 | An11g11190        |

---

---

| Gene ID of H915-1      | Gene ID of 513.88 |
|------------------------|-------------------|
| evm.model.unitig_3.381 | An11g11180        |
| evm.model.unitig_3.382 | An11g11170        |
| evm.model.unitig_3.383 | An11g11160        |
| evm.model.unitig_3.384 | An11g11150        |
| evm.model.unitig_3.385 | An11g11140        |
| evm.model.unitig_3.386 | An11g11130        |
| evm.model.unitig_3.387 | An11g11120        |
| evm.model.unitig_3.388 | An11g11110        |
| evm.model.unitig_3.389 | An11g11100        |
| evm.model.unitig_3.39  | An05g02050        |
| evm.model.unitig_3.390 | An11g11090        |
| evm.model.unitig_3.391 | An11g11080        |
| evm.model.unitig_3.392 | An11g11070        |
| evm.model.unitig_3.393 | An11g11070        |
| evm.model.unitig_3.394 | An11g11050        |
| evm.model.unitig_3.395 | An11g11040        |
| evm.model.unitig_3.396 | An11g11020        |
| evm.model.unitig_3.397 | An11g11010        |
| evm.model.unitig_3.398 | An11g11000        |
| evm.model.unitig_3.399 | An11g10990        |
| evm.model.unitig_3.4   | An05g02510        |
| evm.model.unitig_3.40  | An05g02030        |
| evm.model.unitig_3.400 | An11g10970        |
| evm.model.unitig_3.401 | An11g10960        |
| evm.model.unitig_3.402 | An11g10950        |
| evm.model.unitig_3.403 | An11g10930        |
| evm.model.unitig_3.404 | An11g10920        |
| evm.model.unitig_3.405 | An11g10910        |
| evm.model.unitig_3.406 | An11g10890        |
| evm.model.unitig_3.407 | An11g10870        |
| evm.model.unitig_3.408 | An11g10840        |
| evm.model.unitig_3.409 | An11g10820        |
| evm.model.unitig_3.41  | An05g02010        |
| evm.model.unitig_3.410 | An11g10810        |
| evm.model.unitig_3.411 | An11g10800        |
| evm.model.unitig_3.412 | An11g10790        |
| evm.model.unitig_3.413 | An11g10780        |
| evm.model.unitig_3.414 | An11g10760        |
| evm.model.unitig_3.415 | An11g10750        |
| evm.model.unitig_3.416 | An11g10740        |
| evm.model.unitig_3.417 | An11g10730        |
| evm.model.unitig_3.418 | An11g10720        |
| evm.model.unitig_3.419 | An11g10710        |

---

---

| Gene ID of H915-1      | Gene ID of 513.88 |
|------------------------|-------------------|
| evm.model.unitig_3.42  | An05g02000        |
| evm.model.unitig_3.420 | An11g10690        |
| evm.model.unitig_3.421 | An11g10680        |
| evm.model.unitig_3.422 | An11g10670        |
| evm.model.unitig_3.423 | An11g10660        |
| evm.model.unitig_3.424 | An11g10650        |
| evm.model.unitig_3.425 | An11g10630        |
| evm.model.unitig_3.426 | An11g10620        |
| evm.model.unitig_3.427 | An11g10610        |
| evm.model.unitig_3.428 | An11g10600        |
| evm.model.unitig_3.429 | An11g10580        |
| evm.model.unitig_3.43  | An05g01960        |
| evm.model.unitig_3.430 | An11g10560        |
| evm.model.unitig_3.431 | An11g10540        |
| evm.model.unitig_3.432 | An11g10520        |
| evm.model.unitig_3.433 | An15g05650        |
| evm.model.unitig_3.434 | An11g10490        |
| evm.model.unitig_3.435 | An11g10470        |
| evm.model.unitig_3.436 | An11g10460        |
| evm.model.unitig_3.437 | An11g10450        |
| evm.model.unitig_3.438 | An11g10430        |
| evm.model.unitig_3.439 | An11g10410        |
| evm.model.unitig_3.440 | An11g10400        |
| evm.model.unitig_3.441 | An11g10390        |
| evm.model.unitig_3.442 | An11g10380        |
| evm.model.unitig_3.443 | An11g10350        |
| evm.model.unitig_3.444 | An11g10340        |
| evm.model.unitig_3.445 | An11g10330        |
| evm.model.unitig_3.446 | An11g10320        |
| evm.model.unitig_3.447 | An11g10310        |
| evm.model.unitig_3.448 | An11g10300        |
| evm.model.unitig_3.449 | An11g10290        |
| evm.model.unitig_3.450 | An08g04870        |
| evm.model.unitig_3.451 | An11g09240        |
| evm.model.unitig_3.452 | An11g10260        |
| evm.model.unitig_3.453 | An11g00640        |
| evm.model.unitig_3.454 | An11g00640        |
| evm.model.unitig_3.455 | An11g10240        |
| evm.model.unitig_3.456 | An11g10210        |
| evm.model.unitig_3.457 | An11g10190        |
| evm.model.unitig_3.458 | An11g10180        |
| evm.model.unitig_3.459 | An11g10160        |
| evm.model.unitig_3.46  | An05g01890        |

---

---

| Gene ID of H915-1      | Gene ID of 513.88 |
|------------------------|-------------------|
| evm.model.unitig_3.460 | An11g10150        |
| evm.model.unitig_3.461 | An11g10140        |
| evm.model.unitig_3.462 | An11g10110        |
| evm.model.unitig_3.463 | An11g10100        |
| evm.model.unitig_3.464 | An11g10090        |
| evm.model.unitig_3.465 | An11g10080        |
| evm.model.unitig_3.466 | An11g10070        |
| evm.model.unitig_3.467 | An11g10060        |
| evm.model.unitig_3.468 | An11g10050        |
| evm.model.unitig_3.469 | An11g10030        |
| evm.model.unitig_3.47  | An05g01870        |
| evm.model.unitig_3.470 | An11g10020        |
| evm.model.unitig_3.471 | An11g10000        |
| evm.model.unitig_3.472 | An11g09990        |
| evm.model.unitig_3.473 | An11g09985        |
| evm.model.unitig_3.474 | An11g09980        |
| evm.model.unitig_3.475 | An11g09970        |
| evm.model.unitig_3.476 | An11g09960        |
| evm.model.unitig_3.477 | An11g09950        |
| evm.model.unitig_3.478 | An11g09940        |
| evm.model.unitig_3.479 | An11g09930        |
| evm.model.unitig_3.48  | An05g01860        |
| evm.model.unitig_3.480 | An11g09920        |
| evm.model.unitig_3.481 | An11g09910        |
| evm.model.unitig_3.482 | An11g09900        |
| evm.model.unitig_3.483 | An11g09890        |
| evm.model.unitig_3.484 | An11g09880        |
| evm.model.unitig_3.485 | An11g09870        |
| evm.model.unitig_3.486 | An11g09860        |
| evm.model.unitig_3.487 | An11g09850        |
| evm.model.unitig_3.488 | An11g09840        |
| evm.model.unitig_3.489 | An11g09830        |
| evm.model.unitig_3.49  | An05g01840        |
| evm.model.unitig_3.490 | An11g09820        |
| evm.model.unitig_3.491 | An11g09800        |
| evm.model.unitig_3.492 | An11g09790        |
| evm.model.unitig_3.493 | An11g09790        |
| evm.model.unitig_3.494 | An11g09780        |
| evm.model.unitig_3.495 | An11g09770        |
| evm.model.unitig_3.496 | An11g09760        |
| evm.model.unitig_3.497 | An11g09750        |
| evm.model.unitig_3.498 | An11g09740        |
| evm.model.unitig_3.499 | An11g09730        |

---

---

| Gene ID of H915-1      | Gene ID of 513.88 |
|------------------------|-------------------|
| evm.model.unitig_3.5   | An05g02500        |
| evm.model.unitig_3.50  | An05g01830        |
| evm.model.unitig_3.500 | -                 |
| evm.model.unitig_3.501 | -                 |
| evm.model.unitig_3.502 | An04g04340        |
| evm.model.unitig_3.503 | An11g09710        |
| evm.model.unitig_3.504 | An11g09700        |
| evm.model.unitig_3.505 | An11g09690        |
| evm.model.unitig_3.506 | An11g09680        |
| evm.model.unitig_3.507 | An11g09670        |
| evm.model.unitig_3.508 | An11g09660        |
| evm.model.unitig_3.509 | An11g09650        |
| evm.model.unitig_3.51  | An05g01820        |
| evm.model.unitig_3.511 | An11g09640        |
| evm.model.unitig_3.512 | An11g09630        |
| evm.model.unitig_3.513 | An11g09620        |
| evm.model.unitig_3.514 | An11g09610        |
| evm.model.unitig_3.516 | An11g09600        |
| evm.model.unitig_3.517 | An11g09590        |
| evm.model.unitig_3.518 | An11g09580        |
| evm.model.unitig_3.519 | An11g09570        |
| evm.model.unitig_3.52  | An05g01810        |
| evm.model.unitig_3.520 | An11g09560        |
| evm.model.unitig_3.521 | An11g09550        |
| evm.model.unitig_3.522 | An11g09540        |
| evm.model.unitig_3.523 | An11g09520        |
| evm.model.unitig_3.524 | An11g09510        |
| evm.model.unitig_3.525 | An11g09500        |
| evm.model.unitig_3.526 | An11g09490        |
| evm.model.unitig_3.527 | An11g09480        |
| evm.model.unitig_3.528 | An11g09470        |
| evm.model.unitig_3.529 | An11g09460        |
| evm.model.unitig_3.53  | An05g01800        |
| evm.model.unitig_3.530 | An11g09450        |
| evm.model.unitig_3.531 | An11g09440        |
| evm.model.unitig_3.533 | An11g09420        |
| evm.model.unitig_3.534 | An11g09390        |
| evm.model.unitig_3.535 | An11g09380        |
| evm.model.unitig_3.536 | An11g09370        |
| evm.model.unitig_3.537 | An11g09360        |
| evm.model.unitig_3.538 | An11g09350        |
| evm.model.unitig_3.539 | An11g09340        |
| evm.model.unitig_3.54  | An05g01780        |

---

---

| Gene ID of H915-1      | Gene ID of 513.88 |
|------------------------|-------------------|
| evm.model.unitig_3.540 | An11g09330        |
| evm.model.unitig_3.541 | An11g09320        |
| evm.model.unitig_3.542 | An11g09310        |
| evm.model.unitig_3.546 | -                 |
| evm.model.unitig_3.547 | An11g00810        |
| evm.model.unitig_3.548 | An02g07580        |
| evm.model.unitig_3.549 | An02g03070        |
| evm.model.unitig_3.55  | An05g01770        |
| evm.model.unitig_3.550 | An01g03100        |
| evm.model.unitig_3.551 | -                 |
| evm.model.unitig_3.552 | An11g09270        |
| evm.model.unitig_3.553 | An11g09260        |
| evm.model.unitig_3.554 | An11g09240        |
| evm.model.unitig_3.555 | An11g09230        |
| evm.model.unitig_3.556 | An11g09210        |
| evm.model.unitig_3.557 | An11g09200        |
| evm.model.unitig_3.558 | An11g09190        |
| evm.model.unitig_3.559 | An06g01420        |
| evm.model.unitig_3.56  | An05g01760        |
| evm.model.unitig_3.560 | An11g09170        |
| evm.model.unitig_3.562 | An11g09150        |
| evm.model.unitig_3.563 | An11g09140        |
| evm.model.unitig_3.564 | An11g09130        |
| evm.model.unitig_3.565 | An11g09120        |
| evm.model.unitig_3.566 | An11g09110        |
| evm.model.unitig_3.567 | An11g09010        |
| evm.model.unitig_3.568 | An11g09000        |
| evm.model.unitig_3.569 | An11g08990        |
| evm.model.unitig_3.57  | An05g01750        |
| evm.model.unitig_3.570 | An11g08950        |
| evm.model.unitig_3.571 | An11g08940        |
| evm.model.unitig_3.572 | An11g08930        |
| evm.model.unitig_3.573 | An11g08920        |
| evm.model.unitig_3.575 | An11g08900        |
| evm.model.unitig_3.576 | An11g08890        |
| evm.model.unitig_3.577 | An11g08880        |
| evm.model.unitig_3.578 | An11g08870        |
| evm.model.unitig_3.579 | An11g08860        |
| evm.model.unitig_3.58  | An05g01740        |
| evm.model.unitig_3.580 | An11g08840        |
| evm.model.unitig_3.581 | An11g08830        |
| evm.model.unitig_3.582 | An11g08820        |
| evm.model.unitig_3.583 | An11g08810        |

---

---

| Gene ID of H915-1      | Gene ID of 513.88 |
|------------------------|-------------------|
| evm.model.unitig_3.584 | An11g08790        |
| evm.model.unitig_3.585 | An11g08770        |
| evm.model.unitig_3.586 | An11g08750        |
| evm.model.unitig_3.587 | An11g06320        |
| evm.model.unitig_3.588 | An12g00950        |
| evm.model.unitig_3.589 | An11g08650        |
| evm.model.unitig_3.59  | An05g01720        |
| evm.model.unitig_3.590 | An09g01180        |
| evm.model.unitig_3.591 | An11g08620        |
| evm.model.unitig_3.592 | An11g08610        |
| evm.model.unitig_3.593 | An11g08550        |
| evm.model.unitig_3.594 | -                 |
| evm.model.unitig_3.595 | An11g08530        |
| evm.model.unitig_3.596 | An11g08510        |
| evm.model.unitig_3.597 | An11g08510        |
| evm.model.unitig_3.598 | An11g08470        |
| evm.model.unitig_3.599 | An11g08470        |
| evm.model.unitig_3.6   | An05g02490        |
| evm.model.unitig_3.60  | An05g01710        |
| evm.model.unitig_3.600 | An11g08460        |
| evm.model.unitig_3.601 | An11g08440        |
| evm.model.unitig_3.603 | An11g08410        |
| evm.model.unitig_3.604 | An11g08400        |
| evm.model.unitig_3.606 | An11g08370        |
| evm.model.unitig_3.609 | An11g08320        |
| evm.model.unitig_3.61  | An05g01700        |
| evm.model.unitig_3.610 | An11g08280        |
| evm.model.unitig_3.611 | An11g08260        |
| evm.model.unitig_3.612 | An11g08250        |
| evm.model.unitig_3.614 | An11g08200        |
| evm.model.unitig_3.615 | An11g08190        |
| evm.model.unitig_3.616 | An11g08160        |
| evm.model.unitig_3.617 | An11g08150        |
| evm.model.unitig_3.618 | An11g08140        |
| evm.model.unitig_3.619 | An11g08130        |
| evm.model.unitig_3.62  | An05g01700        |
| evm.model.unitig_3.620 | An11g08100        |
| evm.model.unitig_3.621 | An11g08080        |
| evm.model.unitig_3.622 | An11g08070        |
| evm.model.unitig_3.623 | An11g08060        |
| evm.model.unitig_3.624 | An11g08030        |
| evm.model.unitig_3.625 | An11g08020        |
| evm.model.unitig_3.626 | An11g08010        |

---

---

| Gene ID of H915-1      | Gene ID of 513.88 |
|------------------------|-------------------|
| evm.model.unitig_3.627 | An11g07980        |
| evm.model.unitig_3.628 | An11g07960        |
| evm.model.unitig_3.629 | An11g07950        |
| evm.model.unitig_3.63  | An05g01700        |
| evm.model.unitig_3.630 | An11g07930        |
| evm.model.unitig_3.631 | An11g07910        |
| evm.model.unitig_3.633 | An11g07875        |
| evm.model.unitig_3.634 | An11g07840        |
| evm.model.unitig_3.635 | An11g07830        |
| evm.model.unitig_3.636 | An11g07820        |
| evm.model.unitig_3.637 | -                 |
| evm.model.unitig_3.638 | An18g02610        |
| evm.model.unitig_3.639 | An14g02830        |
| evm.model.unitig_3.64  | -                 |
| evm.model.unitig_3.640 | An11g07780        |
| evm.model.unitig_3.641 | An11g07760        |
| evm.model.unitig_3.642 | An11g07750        |
| evm.model.unitig_3.643 | An11g07740        |
| evm.model.unitig_3.646 | An11g07700        |
| evm.model.unitig_3.647 | An11g07690        |
| evm.model.unitig_3.648 | An11g07680        |
| evm.model.unitig_3.649 | -                 |
| evm.model.unitig_3.65  | An05g01680        |
| evm.model.unitig_3.650 | An11g07670        |
| evm.model.unitig_3.651 | An11g07660        |
| evm.model.unitig_3.652 | An11g07650        |
| evm.model.unitig_3.653 | An11g07640        |
| evm.model.unitig_3.654 | An08g09040        |
| evm.model.unitig_3.655 | An11g07600        |
| evm.model.unitig_3.656 | An11g07590        |
| evm.model.unitig_3.657 | An11g07570        |
| evm.model.unitig_3.658 | An11g07550        |
| evm.model.unitig_3.659 | An09g00640        |
| evm.model.unitig_3.660 | An11g07510        |
| evm.model.unitig_3.661 | An11g07490        |
| evm.model.unitig_3.662 | An11g07450        |
| evm.model.unitig_3.663 | An11g07380        |
| evm.model.unitig_3.664 | An11g07350        |
| evm.model.unitig_3.665 | An11g07330        |
| evm.model.unitig_3.666 | An11g07320        |
| evm.model.unitig_3.667 | An11g07310        |
| evm.model.unitig_3.668 | An11g07300        |
| evm.model.unitig_3.669 | An11g07290        |

---



---

| Gene ID of H915-1      | Gene ID of 513.88 |
|------------------------|-------------------|
| evm.model.unitig_3.67  | An05g01660        |
| evm.model.unitig_3.670 | An11g07270        |
| evm.model.unitig_3.671 | -                 |
| evm.model.unitig_3.672 | An11g07220        |
| evm.model.unitig_3.673 | An11g07210        |
| evm.model.unitig_3.674 | An11g07190        |
| evm.model.unitig_3.675 | An11g07160        |
| evm.model.unitig_3.676 | An11g07150        |
| evm.model.unitig_3.677 | An11g07120        |
| evm.model.unitig_3.678 | An11g07080        |
| evm.model.unitig_3.679 | An11g07070        |
| evm.model.unitig_3.68  | An05g01650        |
| evm.model.unitig_3.680 | An11g07060        |
| evm.model.unitig_3.681 | An11g07030        |
| evm.model.unitig_3.682 | An11g07020        |
| evm.model.unitig_3.683 | An11g07010        |
| evm.model.unitig_3.684 | An11g07000        |
| evm.model.unitig_3.685 | An11g06990        |
| evm.model.unitig_3.686 | An11g06980        |
| evm.model.unitig_3.687 | An11g06970        |
| evm.model.unitig_3.688 | An11g06960        |
| evm.model.unitig_3.689 | An11g06950        |
| evm.model.unitig_3.69  | An05g01640        |
| evm.model.unitig_3.690 | An11g06930        |
| evm.model.unitig_3.691 | An11g06920        |
| evm.model.unitig_3.692 | An11g06900        |
| evm.model.unitig_3.693 | An11g06890        |
| evm.model.unitig_3.694 | An11g06880        |
| evm.model.unitig_3.695 | An11g06860        |
| evm.model.unitig_3.696 | An11g06850        |
| evm.model.unitig_3.697 | An11g06830        |
| evm.model.unitig_3.698 | An11g06820        |
| evm.model.unitig_3.699 | An11g06810        |
| evm.model.unitig_3.7   | An05g02470        |
| evm.model.unitig_3.70  | -                 |
| evm.model.unitig_3.700 | An11g06800        |
| evm.model.unitig_3.701 | An11g06790        |
| evm.model.unitig_3.702 | An11g06780        |
| evm.model.unitig_3.703 | An11g06770        |
| evm.model.unitig_3.704 | An11g06760        |
| evm.model.unitig_3.705 | An11g06750        |
| evm.model.unitig_3.706 | An11g06740        |
| evm.model.unitig_3.707 | An11g06730        |

---

---

| Gene ID of H915-1      | Gene ID of 513.88 |
|------------------------|-------------------|
| evm.model.unitig_3.708 | An11g06720        |
| evm.model.unitig_3.709 | An11g06690        |
| evm.model.unitig_3.71  | An05g01620        |
| evm.model.unitig_3.710 | An11g06680        |
| evm.model.unitig_3.711 | An11g06670        |
| evm.model.unitig_3.712 | An11g06660        |
| evm.model.unitig_3.713 | An11g06650        |
| evm.model.unitig_3.714 | An11g06640        |
| evm.model.unitig_3.715 | An11g06630        |
| evm.model.unitig_3.716 | An11g06610        |
| evm.model.unitig_3.717 | An11g06600        |
| evm.model.unitig_3.718 | An11g06590        |
| evm.model.unitig_3.719 | An11g06570        |
| evm.model.unitig_3.72  | An05g01610        |
| evm.model.unitig_3.720 | An11g06570        |
| evm.model.unitig_3.721 | An11g06540        |
| evm.model.unitig_3.722 | An11g06520        |
| evm.model.unitig_3.723 | An11g06510        |
| evm.model.unitig_3.724 | An11g06490        |
| evm.model.unitig_3.725 | An11g06460        |
| evm.model.unitig_3.726 | An11g06440        |
| evm.model.unitig_3.727 | An11g06430        |
| evm.model.unitig_3.728 | An11g06420        |
| evm.model.unitig_3.729 | An05g01870        |
| evm.model.unitig_3.730 | An11g06330        |
| evm.model.unitig_3.731 | An11g06320        |
| evm.model.unitig_3.732 | An11g06290        |
| evm.model.unitig_3.733 | An11g06280        |
| evm.model.unitig_3.734 | An11g06270        |
| evm.model.unitig_3.735 | An11g06260        |
| evm.model.unitig_3.737 | An11g06230        |
| evm.model.unitig_3.738 | -                 |
| evm.model.unitig_3.739 | An11g06200        |
| evm.model.unitig_3.74  | An05g01560        |
| evm.model.unitig_3.740 | An11g06190        |
| evm.model.unitig_3.741 | An11g06180        |
| evm.model.unitig_3.742 | An11g06170        |
| evm.model.unitig_3.743 | An11g06160        |
| evm.model.unitig_3.744 | An11g06150        |
| evm.model.unitig_3.745 | An11g06140        |
| evm.model.unitig_3.746 | An11g06130        |
| evm.model.unitig_3.747 | An11g06120        |
| evm.model.unitig_3.748 | An11g06110        |

---

---

| Gene ID of H915-1      | Gene ID of 513.88 |
|------------------------|-------------------|
| evm.model.unitig_3.749 | An11g06080        |
| evm.model.unitig_3.75  | An05g01500        |
| evm.model.unitig_3.750 | An11g06060        |
| evm.model.unitig_3.751 | An11g06040        |
| evm.model.unitig_3.752 | An19g00080        |
| evm.model.unitig_3.753 | An11g06000        |
| evm.model.unitig_3.755 | An11g05960        |
| evm.model.unitig_3.756 | An11g05950        |
| evm.model.unitig_3.757 | An11g05940        |
| evm.model.unitig_3.758 | An11g05930        |
| evm.model.unitig_3.759 | An11g05910        |
| evm.model.unitig_3.76  | An05g01490        |
| evm.model.unitig_3.761 | An11g05850        |
| evm.model.unitig_3.762 | An11g05820        |
| evm.model.unitig_3.763 | An11g05810        |
| evm.model.unitig_3.764 | An11g05800        |
| evm.model.unitig_3.766 | An11g05780        |
| evm.model.unitig_3.767 | An11g05770        |
| evm.model.unitig_3.768 | An11g05750        |
| evm.model.unitig_3.769 | An11g05730        |
| evm.model.unitig_3.77  | An05g01480        |
| evm.model.unitig_3.771 | An11g05710        |
| evm.model.unitig_3.772 | An11g05700        |
| evm.model.unitig_3.773 | -                 |
| evm.model.unitig_3.774 | An11g05680        |
| evm.model.unitig_3.775 | An11g05660        |
| evm.model.unitig_3.776 | An11g05640        |
| evm.model.unitig_3.777 | An11g05630        |
| evm.model.unitig_3.778 | An11g05600        |
| evm.model.unitig_3.779 | An11g05580        |
| evm.model.unitig_3.78  | An05g01450        |
| evm.model.unitig_3.780 | An11g05570        |
| evm.model.unitig_3.781 | An11g05560        |
| evm.model.unitig_3.782 | An11g05550        |
| evm.model.unitig_3.783 | -                 |
| evm.model.unitig_3.784 | An11g05530        |
| evm.model.unitig_3.785 | An11g05520        |
| evm.model.unitig_3.786 | An11g05510        |
| evm.model.unitig_3.787 | An11g05500        |
| evm.model.unitig_3.788 | An11g05490        |
| evm.model.unitig_3.789 | An11g05480        |
| evm.model.unitig_3.79  | An05g01440        |
| evm.model.unitig_3.790 | An11g05470        |

---

---

| Gene ID of H915-1      | Gene ID of 513.88 |
|------------------------|-------------------|
| evm.model.unitig_3.791 | -                 |
| evm.model.unitig_3.792 | An11g05460        |
| evm.model.unitig_3.793 | An11g05450        |
| evm.model.unitig_3.794 | An11g05440        |
| evm.model.unitig_3.795 | An11g05430        |
| evm.model.unitig_3.796 | An11g05430        |
| evm.model.unitig_3.797 | An11g05420        |
| evm.model.unitig_3.798 | -                 |
| evm.model.unitig_3.799 | An11g05380        |
| evm.model.unitig_3.8   | An05g02470        |
| evm.model.unitig_3.800 | An11g05350        |
| evm.model.unitig_3.801 | An11g05340        |
| evm.model.unitig_3.802 | An11g05330        |
| evm.model.unitig_3.803 | An11g05320        |
| evm.model.unitig_3.804 | An11g05310        |
| evm.model.unitig_3.805 | An11g05280        |
| evm.model.unitig_3.806 | An11g05260        |
| evm.model.unitig_3.807 | An11g05240        |
| evm.model.unitig_3.808 | An11g05230        |
| evm.model.unitig_3.809 | An11g05190        |
| evm.model.unitig_3.810 | An11g05180        |
| evm.model.unitig_3.811 | An11g05130        |
| evm.model.unitig_3.812 | An11g05120        |
| evm.model.unitig_3.813 | An11g05110        |
| evm.model.unitig_3.815 | An11g05100        |
| evm.model.unitig_3.816 | An02g07610        |
| evm.model.unitig_3.817 | An11g05060        |
| evm.model.unitig_3.818 | An11g05010        |
| evm.model.unitig_3.819 | An11g05000        |
| evm.model.unitig_3.82  | An05g01410        |
| evm.model.unitig_3.820 | An11g04990        |
| evm.model.unitig_3.821 | An11g04970        |
| evm.model.unitig_3.822 | An11g04940        |
| evm.model.unitig_3.823 | An11g04930        |
| evm.model.unitig_3.824 | An11g04880        |
| evm.model.unitig_3.825 | An11g04880        |
| evm.model.unitig_3.826 | An11g04870        |
| evm.model.unitig_3.827 | An11g04860        |
| evm.model.unitig_3.829 | An11g04840        |
| evm.model.unitig_3.83  | An05g01400        |
| evm.model.unitig_3.830 | An11g04830        |
| evm.model.unitig_3.831 | An11g04820        |
| evm.model.unitig_3.832 | An11g04810        |

---

---

| Gene ID of H915-1      | Gene ID of 513.88 |
|------------------------|-------------------|
| evm.model.unitig_3.833 | An11g04780        |
| evm.model.unitig_3.834 | An11g04770        |
| evm.model.unitig_3.835 | An11g04750        |
| evm.model.unitig_3.836 | An11g04740        |
| evm.model.unitig_3.837 | An11g04730        |
| evm.model.unitig_3.838 | An11g04720        |
| evm.model.unitig_3.839 | An01g14020        |
| evm.model.unitig_3.84  | An05g01380        |
| evm.model.unitig_3.840 | An11g04700        |
| evm.model.unitig_3.841 | An11g04690        |
| evm.model.unitig_3.842 | An11g04670        |
| evm.model.unitig_3.843 | An11g04660        |
| evm.model.unitig_3.844 | An11g04650        |
| evm.model.unitig_3.845 | An11g04640        |
| evm.model.unitig_3.846 | An11g04630        |
| evm.model.unitig_3.847 | An11g04620        |
| evm.model.unitig_3.848 | An11g04610        |
| evm.model.unitig_3.849 | An11g04600        |
| evm.model.unitig_3.85  | An05g01370        |
| evm.model.unitig_3.850 | An11g04600        |
| evm.model.unitig_3.851 | An11g04550        |
| evm.model.unitig_3.852 | An11g04540        |
| evm.model.unitig_3.853 | An11g04530        |
| evm.model.unitig_3.854 | An11g04520        |
| evm.model.unitig_3.855 | An11g04510        |
| evm.model.unitig_3.856 | An11g04500        |
| evm.model.unitig_3.857 | An11g04480        |
| evm.model.unitig_3.858 | An11g04470        |
| evm.model.unitig_3.859 | An11g04460        |
| evm.model.unitig_3.86  | An05g00980        |
| evm.model.unitig_3.860 | An11g04420        |
| evm.model.unitig_3.861 | An11g04410        |
| evm.model.unitig_3.862 | An11g04400        |
| evm.model.unitig_3.863 | An11g04380        |
| evm.model.unitig_3.864 | An11g04370        |
| evm.model.unitig_3.865 | An11g04360        |
| evm.model.unitig_3.866 | An11g04340        |
| evm.model.unitig_3.867 | An11g04320        |
| evm.model.unitig_3.868 | An11g04310        |
| evm.model.unitig_3.869 | An11g04290        |
| evm.model.unitig_3.87  | An05g00990        |
| evm.model.unitig_3.870 | An11g04280        |
| evm.model.unitig_3.871 | An11g04270        |

---

---

| Gene ID of H915-1      | Gene ID of 513.88 |
|------------------------|-------------------|
| evm.model.unitig_3.872 | An11g04260        |
| evm.model.unitig_3.873 | An11g04250        |
| evm.model.unitig_3.874 | An11g04240        |
| evm.model.unitig_3.875 | An03g03030        |
| evm.model.unitig_3.876 | An11g04220        |
| evm.model.unitig_3.877 | An11g04210        |
| evm.model.unitig_3.878 | An11g04200        |
| evm.model.unitig_3.879 | An11g04180        |
| evm.model.unitig_3.88  | An05g01000        |
| evm.model.unitig_3.880 | An11g04150        |
| evm.model.unitig_3.881 | An11g04120        |
| evm.model.unitig_3.882 | An11g04110        |
| evm.model.unitig_3.883 | An11g04100        |
| evm.model.unitig_3.884 | An11g04090        |
| evm.model.unitig_3.886 | An11g04060        |
| evm.model.unitig_3.887 | An12g01700        |
| evm.model.unitig_3.888 | An11g04040        |
| evm.model.unitig_3.889 | An11g04030        |
| evm.model.unitig_3.89  | An05g01010        |
| evm.model.unitig_3.890 | An11g04020        |
| evm.model.unitig_3.891 | An11g04010        |
| evm.model.unitig_3.892 | An11g04000        |
| evm.model.unitig_3.893 | An11g03970        |
| evm.model.unitig_3.894 | An11g03960        |
| evm.model.unitig_3.897 | An08g08410        |
| evm.model.unitig_3.898 | An16g02400        |
| evm.model.unitig_3.899 | An11g03900        |
| evm.model.unitig_3.9   | An05g02460        |
| evm.model.unitig_3.90  | An05g01030        |
| evm.model.unitig_3.900 | An11g03890        |
| evm.model.unitig_3.901 | An11g03880        |
| evm.model.unitig_3.902 | An11g03870        |
| evm.model.unitig_3.903 | An11g03860        |
| evm.model.unitig_3.904 | An11g03830        |
| evm.model.unitig_3.905 | An11g03820        |
| evm.model.unitig_3.906 | An11g03810        |
| evm.model.unitig_3.907 | An11g03800        |
| evm.model.unitig_3.908 | An11g03790        |
| evm.model.unitig_3.909 | An11g03780        |
| evm.model.unitig_3.91  | An05g01040        |
| evm.model.unitig_3.910 | An11g03770        |
| evm.model.unitig_3.911 | An11g03760        |
| evm.model.unitig_3.913 | An11g03740        |

---

---

| Gene ID of H915-1      | Gene ID of 513.88 |
|------------------------|-------------------|
| evm.model.unitig_3.914 | An11g03730        |
| evm.model.unitig_3.915 | An11g03700        |
| evm.model.unitig_3.916 | An11g03690        |
| evm.model.unitig_3.917 | An11g03680        |
| evm.model.unitig_3.918 | An11g03660        |
| evm.model.unitig_3.919 | An11g03640        |
| evm.model.unitig_3.92  | An05g01060        |
| evm.model.unitig_3.920 | An11g03630        |
| evm.model.unitig_3.921 | An11g03620        |
| evm.model.unitig_3.922 | An11g03610        |
| evm.model.unitig_3.923 | An11g03600        |
| evm.model.unitig_3.924 | An11g03590        |
| evm.model.unitig_3.925 | An11g03580        |
| evm.model.unitig_3.926 | An11g03540        |
| evm.model.unitig_3.927 | An11g03530        |
| evm.model.unitig_3.928 | An11g03510        |
| evm.model.unitig_3.929 | An11g03500        |
| evm.model.unitig_3.93  | An05g01070        |
| evm.model.unitig_3.930 | An11g03480        |
| evm.model.unitig_3.931 | An11g03470        |
| evm.model.unitig_3.932 | An11g03460        |
| evm.model.unitig_3.933 | An11g03430        |
| evm.model.unitig_3.934 | An11g03420        |
| evm.model.unitig_3.935 | An11g03400        |
| evm.model.unitig_3.936 | An11g03390        |
| evm.model.unitig_3.937 | An11g03380        |
| evm.model.unitig_3.938 | An11g03350        |
| evm.model.unitig_3.939 | An11g03340        |
| evm.model.unitig_3.94  | An09g00380        |
| evm.model.unitig_3.940 | An11g03330        |
| evm.model.unitig_3.941 | An11g03310        |
| evm.model.unitig_3.942 | An11g03290        |
| evm.model.unitig_3.943 | An11g03270        |
| evm.model.unitig_3.944 | An11g03260        |
| evm.model.unitig_3.945 | An11g03240        |
| evm.model.unitig_3.946 | An11g03230        |
| evm.model.unitig_3.947 | An11g03220        |
| evm.model.unitig_3.948 | An11g03200        |
| evm.model.unitig_3.949 | An11g03190        |
| evm.model.unitig_3.95  | -                 |
| evm.model.unitig_3.950 | An11g03180        |
| evm.model.unitig_3.951 | An11g03170        |
| evm.model.unitig_3.952 | An11g03160        |

---

---

| Gene ID of H915-1      | Gene ID of 513.88 |
|------------------------|-------------------|
| evm.model.unitig_3.953 | An11g03130        |
| evm.model.unitig_3.954 | An11g03120        |
| evm.model.unitig_3.955 | An11g03110        |
| evm.model.unitig_3.956 | An11g03090        |
| evm.model.unitig_3.958 | An11g03060        |
| evm.model.unitig_3.959 | An11g03150        |
| evm.model.unitig_3.96  | An05g01100        |
| evm.model.unitig_3.960 | An11g03040        |
| evm.model.unitig_3.961 | An11g03000        |
| evm.model.unitig_3.962 | An11g02990        |
| evm.model.unitig_3.963 | An11g02980        |
| evm.model.unitig_3.964 | An11g02970        |
| evm.model.unitig_3.965 | An11g02960        |
| evm.model.unitig_3.966 | An11g02950        |
| evm.model.unitig_3.967 | An11g02900        |
| evm.model.unitig_3.968 | An11g02870        |
| evm.model.unitig_3.969 | An11g02860        |
| evm.model.unitig_3.97  | An05g01110        |
| evm.model.unitig_3.970 | An11g02850        |
| evm.model.unitig_3.971 | An11g02840        |
| evm.model.unitig_3.972 | An11g02830        |
| evm.model.unitig_3.973 | An11g02780        |
| evm.model.unitig_3.974 | An11g02770        |
| evm.model.unitig_3.975 | An11g02760        |
| evm.model.unitig_3.976 | An11g02750        |
| evm.model.unitig_3.977 | An11g02730        |
| evm.model.unitig_3.978 | An11g02700        |
| evm.model.unitig_3.979 | An11g02690        |
| evm.model.unitig_3.98  | An05g01120        |
| evm.model.unitig_3.980 | An11g02670        |
| evm.model.unitig_3.981 | An11g02660        |
| evm.model.unitig_3.982 | An11g02650        |
| evm.model.unitig_3.983 | An11g02640        |
| evm.model.unitig_3.984 | An11g02630        |
| evm.model.unitig_3.985 | An11g02620        |
| evm.model.unitig_3.986 | An11g02610        |
| evm.model.unitig_3.987 | An11g02600        |
| evm.model.unitig_3.988 | An11g02590        |
| evm.model.unitig_3.989 | An11g02580        |
| evm.model.unitig_3.99  | An05g01140        |
| evm.model.unitig_3.990 | An11g02550        |
| evm.model.unitig_3.991 | An10g00660        |
| evm.model.unitig_3.992 | An11g02540        |

---



---

| Gene ID of H915-1       | Gene ID of 513.88 |
|-------------------------|-------------------|
| evm.model.unitig_3.993  | An11g02520        |
| evm.model.unitig_3.994  | An11g02510        |
| evm.model.unitig_3.995  | An11g02500        |
| evm.model.unitig_3.996  | An11g02480        |
| evm.model.unitig_3.997  | An11g02470        |
| evm.model.unitig_3.998  | An11g02460        |
| evm.model.unitig_3.999  | An11g02450        |
| evm.model.unitig_4.1    | An03g06500        |
| evm.model.unitig_4.10   | An15g07910        |
| evm.model.unitig_4.100  | An15g06700        |
| evm.model.unitig_4.1000 | An12g08320        |
| evm.model.unitig_4.1001 | An12g08340        |
| evm.model.unitig_4.1002 | An12g08350        |
| evm.model.unitig_4.1003 | An12g08360        |
| evm.model.unitig_4.1004 | An12g08370        |
| evm.model.unitig_4.1005 | An12g08380        |
| evm.model.unitig_4.1006 | An12g08390        |
| evm.model.unitig_4.1007 | An12g08400        |
| evm.model.unitig_4.1008 | An12g08510        |
| evm.model.unitig_4.1009 | An12g08530        |
| evm.model.unitig_4.101  | An15g06690        |
| evm.model.unitig_4.1010 | An12g08550        |
| evm.model.unitig_4.1011 | An12g08560        |
| evm.model.unitig_4.1012 | An12g08570        |
| evm.model.unitig_4.1013 | An12g08580        |
| evm.model.unitig_4.1014 | An12g08590        |
| evm.model.unitig_4.1015 | An12g08610        |
| evm.model.unitig_4.1016 | An12g08620        |
| evm.model.unitig_4.1017 | An12g08630        |
| evm.model.unitig_4.1018 | An12g08640        |
| evm.model.unitig_4.1019 | An12g08650        |
| evm.model.unitig_4.102  | An15g06680        |
| evm.model.unitig_4.1020 | An12g08660        |
| evm.model.unitig_4.1021 | An12g08670        |
| evm.model.unitig_4.1022 | An12g08680        |
| evm.model.unitig_4.1023 | An12g08690        |
| evm.model.unitig_4.1025 | An12g08720        |
| evm.model.unitig_4.1026 | An12g08730        |
| evm.model.unitig_4.1027 | An12g08750        |
| evm.model.unitig_4.1028 | An12g08760        |
| evm.model.unitig_4.1029 | An12g08770        |
| evm.model.unitig_4.103  | An15g06670        |
| evm.model.unitig_4.1030 | An12g08790        |

---

---

| Gene ID of H915-1       | Gene ID of 513.88 |
|-------------------------|-------------------|
| evm.model.unitig_4.1031 | An12g08800        |
| evm.model.unitig_4.1032 | An12g08820        |
| evm.model.unitig_4.1033 | An12g08830        |
| evm.model.unitig_4.1034 | An12g08890        |
| evm.model.unitig_4.1035 | An12g08900        |
| evm.model.unitig_4.1036 | An12g08930        |
| evm.model.unitig_4.1037 | An12g08940        |
| evm.model.unitig_4.1038 | An12g08950        |
| evm.model.unitig_4.104  | An15g06660        |
| evm.model.unitig_4.1040 | An12g08960        |
| evm.model.unitig_4.1041 | An12g09020        |
| evm.model.unitig_4.1042 | -                 |
| evm.model.unitig_4.1043 | An12g09120        |
| evm.model.unitig_4.1044 | An12g09130        |
| evm.model.unitig_4.1045 | An12g09140        |
| evm.model.unitig_4.1046 | An12g06490        |
| evm.model.unitig_4.1048 | An12g09270        |
| evm.model.unitig_4.1049 | An12g09280        |
| evm.model.unitig_4.105  | An15g06650        |
| evm.model.unitig_4.1050 | An12g09310        |
| evm.model.unitig_4.1051 | An12g09330        |
| evm.model.unitig_4.1052 | An12g09340        |
| evm.model.unitig_4.1053 | An12g09350        |
| evm.model.unitig_4.1054 | An12g09370        |
| evm.model.unitig_4.1056 | An12g09440        |
| evm.model.unitig_4.1057 | -                 |
| evm.model.unitig_4.1058 | An12g09460        |
| evm.model.unitig_4.1059 | An12g09470        |
| evm.model.unitig_4.106  | An15g06600        |
| evm.model.unitig_4.1060 | An12g09480        |
| evm.model.unitig_4.1061 | An12g09500        |
| evm.model.unitig_4.1062 | An12g09530        |
| evm.model.unitig_4.1064 | An12g09580        |
| evm.model.unitig_4.1065 | An12g09610        |
| evm.model.unitig_4.1066 | -                 |
| evm.model.unitig_4.1067 | An12g09630        |
| evm.model.unitig_4.1068 | An12g09640        |
| evm.model.unitig_4.1069 | An12g09650        |
| evm.model.unitig_4.107  | An15g06580        |
| evm.model.unitig_4.1070 | An12g09660        |
| evm.model.unitig_4.1071 | An12g09670        |
| evm.model.unitig_4.1072 | An12g09680        |
| evm.model.unitig_4.1073 | An12g09700        |

---

---

| Gene ID of H915-1       | Gene ID of 513.88 |
|-------------------------|-------------------|
| evm.model.unitig_4.1074 | An12g09720        |
| evm.model.unitig_4.1075 | An12g09750        |
| evm.model.unitig_4.1076 | An12g09760        |
| evm.model.unitig_4.1077 | An12g09780        |
| evm.model.unitig_4.1078 | An12g09790        |
| evm.model.unitig_4.1079 | An12g09810        |
| evm.model.unitig_4.1080 | An12g09820        |
| evm.model.unitig_4.1081 | An12g09830        |
| evm.model.unitig_4.1082 | An01g11010        |
| evm.model.unitig_4.1083 | An12g09860        |
| evm.model.unitig_4.1084 | An12g09880        |
| evm.model.unitig_4.1085 | An12g09900        |
| evm.model.unitig_4.1086 | An12g09910        |
| evm.model.unitig_4.1089 | An12g09940        |
| evm.model.unitig_4.109  | An15g06560        |
| evm.model.unitig_4.1090 | An12g09950        |
| evm.model.unitig_4.1091 | An12g09960        |
| evm.model.unitig_4.1092 | An12g09970        |
| evm.model.unitig_4.1093 | An12g09980        |
| evm.model.unitig_4.1094 | An12g09990        |
| evm.model.unitig_4.1095 | An12g10000        |
| evm.model.unitig_4.1096 | An12g10020        |
| evm.model.unitig_4.1097 | An12g10030        |
| evm.model.unitig_4.1098 | An12g10050        |
| evm.model.unitig_4.1099 | An12g10060        |
| evm.model.unitig_4.11   | An15g07900        |
| evm.model.unitig_4.110  | An15g06550        |
| evm.model.unitig_4.1101 | An12g10090        |
| evm.model.unitig_4.1102 | An12g10100        |
| evm.model.unitig_4.1103 | An12g10110        |
| evm.model.unitig_4.1104 | An12g10120        |
| evm.model.unitig_4.1105 | An12g10130        |
| evm.model.unitig_4.1106 | An12g10140        |
| evm.model.unitig_4.1107 | An12g10150        |
| evm.model.unitig_4.1108 | An12g10160        |
| evm.model.unitig_4.1109 | An12g10170        |
| evm.model.unitig_4.111  | An15g06540        |
| evm.model.unitig_4.1110 | An12g10180        |
| evm.model.unitig_4.1111 | An12g10190        |
| evm.model.unitig_4.1112 | -                 |
| evm.model.unitig_4.1113 | An12g10220        |
| evm.model.unitig_4.1114 | An12g10230        |
| evm.model.unitig_4.1115 | An12g10240        |

---

---

| Gene ID of H915-1       | Gene ID of 513.88 |
|-------------------------|-------------------|
| evm.model.unitig_4.1116 | An12g10250        |
| evm.model.unitig_4.1117 | An02g11030        |
| evm.model.unitig_4.1118 | An02g11030        |
| evm.model.unitig_4.1119 | An12g10280        |
| evm.model.unitig_4.1120 | An12g10290        |
| evm.model.unitig_4.1121 | An12g09260        |
| evm.model.unitig_4.1122 | An12g10320        |
| evm.model.unitig_4.1123 | An08g07910        |
| evm.model.unitig_4.1124 | An12g10330        |
| evm.model.unitig_4.1125 | An12g10350        |
| evm.model.unitig_4.1126 | An12g10360        |
| evm.model.unitig_4.1127 | An12g10380        |
| evm.model.unitig_4.1128 | An12g10390        |
| evm.model.unitig_4.1129 | An12g10400        |
| evm.model.unitig_4.113  | An15g06500        |
| evm.model.unitig_4.1130 | An12g10410        |
| evm.model.unitig_4.1131 | An12g10430        |
| evm.model.unitig_4.1132 | An12g10430        |
| evm.model.unitig_4.1133 | An12g10440        |
| evm.model.unitig_4.1134 | An12g10450        |
| evm.model.unitig_4.1135 | An12g10470        |
| evm.model.unitig_4.1136 | An12g10480        |
| evm.model.unitig_4.1137 | An12g10490        |
| evm.model.unitig_4.114  | An15g06490        |
| evm.model.unitig_4.115  | An15g06480        |
| evm.model.unitig_4.116  | An15g06470        |
| evm.model.unitig_4.117  | An15g06460        |
| evm.model.unitig_4.118  | An15g06450        |
| evm.model.unitig_4.119  | An15g06440        |
| evm.model.unitig_4.12   | An15g07880        |
| evm.model.unitig_4.120  | An15g06430        |
| evm.model.unitig_4.121  | An15g06420        |
| evm.model.unitig_4.122  | An15g06410        |
| evm.model.unitig_4.123  | An15g06400        |
| evm.model.unitig_4.124  | An15g06390        |
| evm.model.unitig_4.125  | An15g06380        |
| evm.model.unitig_4.126  | An15g06370        |
| evm.model.unitig_4.127  | An15g06360        |
| evm.model.unitig_4.128  | An15g06350        |
| evm.model.unitig_4.130  | An15g06320        |
| evm.model.unitig_4.131  | An15g06310        |
| evm.model.unitig_4.132  | An15g06290        |
| evm.model.unitig_4.133  | An15g06280        |

---

---

| Gene ID of H915-1      | Gene ID of 513.88 |
|------------------------|-------------------|
| evm.model.unitig_4.134 | An15g06270        |
| evm.model.unitig_4.135 | An15g06260        |
| evm.model.unitig_4.136 | An15g06250        |
| evm.model.unitig_4.137 | An15g06230        |
| evm.model.unitig_4.138 | An15g06220        |
| evm.model.unitig_4.139 | An15g06210        |
| evm.model.unitig_4.140 | An15g06200        |
| evm.model.unitig_4.141 | An15g06190        |
| evm.model.unitig_4.142 | An15g06180        |
| evm.model.unitig_4.143 | An15g06160        |
| evm.model.unitig_4.144 | An15g06150        |
| evm.model.unitig_4.145 | An15g06140        |
| evm.model.unitig_4.146 | An15g06120        |
| evm.model.unitig_4.147 | An15g06110        |
| evm.model.unitig_4.148 | An15g06080        |
| evm.model.unitig_4.149 | An15g06050        |
| evm.model.unitig_4.15  | An15g07840        |
| evm.model.unitig_4.150 | An15g06040        |
| evm.model.unitig_4.151 | An15g06030        |
| evm.model.unitig_4.152 | An15g06020        |
| evm.model.unitig_4.153 | An15g06010        |
| evm.model.unitig_4.154 | An15g05990        |
| evm.model.unitig_4.155 | An15g05980        |
| evm.model.unitig_4.156 | An15g05970        |
| evm.model.unitig_4.157 | An15g05960        |
| evm.model.unitig_4.158 | An15g05940        |
| evm.model.unitig_4.159 | An15g05920        |
| evm.model.unitig_4.16  | An15g07830        |
| evm.model.unitig_4.160 | An15g05910        |
| evm.model.unitig_4.161 | -                 |
| evm.model.unitig_4.162 | An15g05890        |
| evm.model.unitig_4.163 | An15g05880        |
| evm.model.unitig_4.165 | An15g05820        |
| evm.model.unitig_4.166 | An15g05810        |
| evm.model.unitig_4.167 | An15g05790        |
| evm.model.unitig_4.168 | An15g05790        |
| evm.model.unitig_4.169 | An15g05770        |
| evm.model.unitig_4.17  | An15g07820        |
| evm.model.unitig_4.170 | An15g05750        |
| evm.model.unitig_4.171 | An15g05740        |
| evm.model.unitig_4.172 | An15g05730        |
| evm.model.unitig_4.173 | An15g05720        |
| evm.model.unitig_4.174 | An15g05710        |

---

---

| Gene ID of H915-1      | Gene ID of 513.88 |
|------------------------|-------------------|
| evm.model.unitig_4.175 | An15g05700        |
| evm.model.unitig_4.176 | An15g05690        |
| evm.model.unitig_4.177 | An15g05670        |
| evm.model.unitig_4.178 | An15g05650        |
| evm.model.unitig_4.179 | An15g05630        |
| evm.model.unitig_4.18  | An15g07820        |
| evm.model.unitig_4.180 | An15g05630        |
| evm.model.unitig_4.182 | An15g05580        |
| evm.model.unitig_4.183 | An15g05550        |
| evm.model.unitig_4.184 | An15g05540        |
| evm.model.unitig_4.185 | An15g05530        |
| evm.model.unitig_4.186 | An15g05520        |
| evm.model.unitig_4.187 | An15g05510        |
| evm.model.unitig_4.188 | An15g05500        |
| evm.model.unitig_4.189 | An15g05490        |
| evm.model.unitig_4.19  | An15g07810        |
| evm.model.unitig_4.190 | An15g05490        |
| evm.model.unitig_4.191 | An15g05490        |
| evm.model.unitig_4.192 | An15g05470        |
| evm.model.unitig_4.193 | An15g05460        |
| evm.model.unitig_4.194 | An15g05450        |
| evm.model.unitig_4.195 | An15g05440        |
| evm.model.unitig_4.196 | An15g05410        |
| evm.model.unitig_4.197 | An15g05400        |
| evm.model.unitig_4.198 | An15g05370        |
| evm.model.unitig_4.199 | An15g05360        |
| evm.model.unitig_4.2   | An16g07710        |
| evm.model.unitig_4.20  | An15g07800        |
| evm.model.unitig_4.200 | An15g05350        |
| evm.model.unitig_4.201 | An15g05320        |
| evm.model.unitig_4.202 | An15g05310        |
| evm.model.unitig_4.203 | An15g05290        |
| evm.model.unitig_4.204 | An15g05280        |
| evm.model.unitig_4.205 | An15g05280        |
| evm.model.unitig_4.206 | An15g05270        |
| evm.model.unitig_4.207 | An15g05230        |
| evm.model.unitig_4.208 | An15g05200        |
| evm.model.unitig_4.209 | An15g05180        |
| evm.model.unitig_4.21  | An15g07760        |
| evm.model.unitig_4.210 | An05g01850        |
| evm.model.unitig_4.211 | An15g05130        |
| evm.model.unitig_4.212 | An15g05120        |
| evm.model.unitig_4.213 | An15g05110        |

---

---

| Gene ID of H915-1      | Gene ID of 513.88 |
|------------------------|-------------------|
| evm.model.unitig_4.214 | An15g05090        |
| evm.model.unitig_4.215 | An15g05080        |
| evm.model.unitig_4.216 | An15g05070        |
| evm.model.unitig_4.217 | An15g05060        |
| evm.model.unitig_4.218 | An15g05030        |
| evm.model.unitig_4.219 | An15g05020        |
| evm.model.unitig_4.22  | An15g07740        |
| evm.model.unitig_4.222 | An15g04940        |
| evm.model.unitig_4.223 | An15g04930        |
| evm.model.unitig_4.224 | An15g04920        |
| evm.model.unitig_4.225 | An15g04900        |
| evm.model.unitig_4.226 | An15g04880        |
| evm.model.unitig_4.228 | An15g04860        |
| evm.model.unitig_4.229 | An15g04850        |
| evm.model.unitig_4.23  | An15g07730        |
| evm.model.unitig_4.230 | An15g04830        |
| evm.model.unitig_4.231 | An15g04820        |
| evm.model.unitig_4.232 | An15g04810        |
| evm.model.unitig_4.233 | An15g04800        |
| evm.model.unitig_4.234 | An15g04790        |
| evm.model.unitig_4.235 | An15g04780        |
| evm.model.unitig_4.236 | An15g04770        |
| evm.model.unitig_4.237 | An15g04760        |
| evm.model.unitig_4.238 | -                 |
| evm.model.unitig_4.239 | An15g04750        |
| evm.model.unitig_4.24  | An15g07720        |
| evm.model.unitig_4.240 | An15g04740        |
| evm.model.unitig_4.241 | An15g04720        |
| evm.model.unitig_4.242 | -                 |
| evm.model.unitig_4.243 | An15g04690        |
| evm.model.unitig_4.244 | An15g04680        |
| evm.model.unitig_4.245 | An15g04670        |
| evm.model.unitig_4.246 | An15g04660        |
| evm.model.unitig_4.247 | An15g04650        |
| evm.model.unitig_4.248 | An15g04640        |
| evm.model.unitig_4.249 | An15g04630        |
| evm.model.unitig_4.25  | An15g07710        |
| evm.model.unitig_4.250 | An15g04620        |
| evm.model.unitig_4.251 | An15g04610        |
| evm.model.unitig_4.252 | An15g04470        |
| evm.model.unitig_4.253 | An15g04480        |
| evm.model.unitig_4.254 | An15g04490        |
| evm.model.unitig_4.256 | An15g04490        |

---

---

| Gene ID of H915-1      | Gene ID of 513.88 |
|------------------------|-------------------|
| evm.model.unitig_4.257 | An15g04520        |
| evm.model.unitig_4.258 | An08g09140        |
| evm.model.unitig_4.259 | An15g04550        |
| evm.model.unitig_4.26  | An15g07700        |
| evm.model.unitig_4.261 | An15g04570        |
| evm.model.unitig_4.262 | An15g04580        |
| evm.model.unitig_4.263 | An15g04590        |
| evm.model.unitig_4.264 | An15g04600        |
| evm.model.unitig_4.265 | An15g04440        |
| evm.model.unitig_4.266 | An15g04430        |
| evm.model.unitig_4.267 | An15g04420        |
| evm.model.unitig_4.268 | An15g04410        |
| evm.model.unitig_4.269 | An15g04390        |
| evm.model.unitig_4.27  | An15g07670        |
| evm.model.unitig_4.270 | An15g04380        |
| evm.model.unitig_4.271 | An15g04370        |
| evm.model.unitig_4.272 | An15g04370        |
| evm.model.unitig_4.273 | An15g04360        |
| evm.model.unitig_4.274 | An15g04350        |
| evm.model.unitig_4.275 | An15g04340        |
| evm.model.unitig_4.276 | An15g04320        |
| evm.model.unitig_4.277 | An15g04310        |
| evm.model.unitig_4.278 | An15g04300        |
| evm.model.unitig_4.279 | An15g04290        |
| evm.model.unitig_4.280 | An15g04260        |
| evm.model.unitig_4.281 | An15g04220        |
| evm.model.unitig_4.282 | An02g01120        |
| evm.model.unitig_4.283 | An15g04170        |
| evm.model.unitig_4.284 | An15g04150        |
| evm.model.unitig_4.285 | An15g04140        |
| evm.model.unitig_4.286 | An15g04130        |
| evm.model.unitig_4.287 | An15g04120        |
| evm.model.unitig_4.289 | An15g04100        |
| evm.model.unitig_4.29  | An15g07600        |
| evm.model.unitig_4.290 | An15g04060        |
| evm.model.unitig_4.291 | An15g04050        |
| evm.model.unitig_4.292 | An15g04010        |
| evm.model.unitig_4.293 | An15g03990        |
| evm.model.unitig_4.294 | An15g03980        |
| evm.model.unitig_4.296 | An15g03950        |
| evm.model.unitig_4.297 | An15g03910        |
| evm.model.unitig_4.298 | An15g03900        |
| evm.model.unitig_4.299 | An15g03880        |

---



---

| Gene ID of H915-1      | Gene ID of 513.88 |
|------------------------|-------------------|
| evm.model.unitig_4.3   | An16g01190        |
| evm.model.unitig_4.30  | An15g07590        |
| evm.model.unitig_4.300 | An15g03860        |
| evm.model.unitig_4.301 | An15g03820        |
| evm.model.unitig_4.302 | An15g03810        |
| evm.model.unitig_4.303 | An15g03800        |
| evm.model.unitig_4.304 | An15g03780        |
| evm.model.unitig_4.305 | An15g03760        |
| evm.model.unitig_4.306 | An15g03750        |
| evm.model.unitig_4.307 | An15g03740        |
| evm.model.unitig_4.308 | An15g03730        |
| evm.model.unitig_4.309 | An15g03710        |
| evm.model.unitig_4.31  | An15g07580        |
| evm.model.unitig_4.310 | An15g03680        |
| evm.model.unitig_4.311 | An15g03670        |
| evm.model.unitig_4.312 | An15g03650        |
| evm.model.unitig_4.313 | An15g03580        |
| evm.model.unitig_4.314 | An15g03570        |
| evm.model.unitig_4.315 | An15g03550        |
| evm.model.unitig_4.316 | An15g03540        |
| evm.model.unitig_4.317 | An15g03530        |
| evm.model.unitig_4.318 | An15g03500        |
| evm.model.unitig_4.319 | An15g03490        |
| evm.model.unitig_4.32  | An15g07570        |
| evm.model.unitig_4.320 | -                 |
| evm.model.unitig_4.321 | An15g03420        |
| evm.model.unitig_4.322 | An15g03410        |
| evm.model.unitig_4.323 | An15g03400        |
| evm.model.unitig_4.324 | An15g03390        |
| evm.model.unitig_4.325 | An15g03380        |
| evm.model.unitig_4.326 | An15g03370        |
| evm.model.unitig_4.327 | An15g03350        |
| evm.model.unitig_4.328 | An15g03340        |
| evm.model.unitig_4.329 | An15g03330        |
| evm.model.unitig_4.33  | An15g07560        |
| evm.model.unitig_4.330 | An15g03300        |
| evm.model.unitig_4.331 | An15g03280        |
| evm.model.unitig_4.332 | An15g03240        |
| evm.model.unitig_4.333 | An15g03220        |
| evm.model.unitig_4.334 | An15g03210        |
| evm.model.unitig_4.335 | An15g03200        |
| evm.model.unitig_4.336 | An15g03190        |
| evm.model.unitig_4.337 | An15g03190        |

---

---

| Gene ID of H915-1      | Gene ID of 513.88 |
|------------------------|-------------------|
| evm.model.unitig_4.338 | An15g03150        |
| evm.model.unitig_4.339 | An15g03140        |
| evm.model.unitig_4.34  | An15g07550        |
| evm.model.unitig_4.340 | An15g03100        |
| evm.model.unitig_4.341 | An15g03090        |
| evm.model.unitig_4.342 | An15g03080        |
| evm.model.unitig_4.343 | An15g03040        |
| evm.model.unitig_4.344 | An15g03030        |
| evm.model.unitig_4.345 | An15g03020        |
| evm.model.unitig_4.346 | An15g02990        |
| evm.model.unitig_4.347 | An15g02980        |
| evm.model.unitig_4.348 | An15g02960        |
| evm.model.unitig_4.349 | An15g02930        |
| evm.model.unitig_4.35  | An15g07530        |
| evm.model.unitig_4.350 | An15g02900        |
| evm.model.unitig_4.351 | An15g02890        |
| evm.model.unitig_4.352 | An15g02880        |
| evm.model.unitig_4.354 | An15g02860        |
| evm.model.unitig_4.355 | An15g02850        |
| evm.model.unitig_4.356 | An15g02840        |
| evm.model.unitig_4.357 | An15g02830        |
| evm.model.unitig_4.358 | An15g02820        |
| evm.model.unitig_4.359 | An15g02810        |
| evm.model.unitig_4.36  | An15g07520        |
| evm.model.unitig_4.360 | An15g02770        |
| evm.model.unitig_4.361 | An15g02760        |
| evm.model.unitig_4.362 | An15g02750        |
| evm.model.unitig_4.363 | An15g02740        |
| evm.model.unitig_4.364 | An15g02710        |
| evm.model.unitig_4.365 | An15g02700        |
| evm.model.unitig_4.366 | An15g02690        |
| evm.model.unitig_4.367 | An15g02670        |
| evm.model.unitig_4.368 | An15g02670        |
| evm.model.unitig_4.369 | An15g02650        |
| evm.model.unitig_4.37  | An15g07510        |
| evm.model.unitig_4.370 | An15g02640        |
| evm.model.unitig_4.371 | An15g02630        |
| evm.model.unitig_4.372 | An15g02620        |
| evm.model.unitig_4.373 | An15g02610        |
| evm.model.unitig_4.374 | An15g02600        |
| evm.model.unitig_4.375 | An15g02590        |
| evm.model.unitig_4.377 | An15g02550        |
| evm.model.unitig_4.378 | An18g01500        |

---

---

| Gene ID of H915-1      | Gene ID of 513.88 |
|------------------------|-------------------|
| evm.model.unitig_4.379 | An15g02520        |
| evm.model.unitig_4.38  | An15g07500        |
| evm.model.unitig_4.381 | An15g02490        |
| evm.model.unitig_4.382 | An15g02470        |
| evm.model.unitig_4.383 | An15g02460        |
| evm.model.unitig_4.384 | An15g02450        |
| evm.model.unitig_4.385 | An15g02440        |
| evm.model.unitig_4.386 | An15g02420        |
| evm.model.unitig_4.387 | An15g02410        |
| evm.model.unitig_4.388 | An15g02400        |
| evm.model.unitig_4.389 | An15g02390        |
| evm.model.unitig_4.39  | An15g07490        |
| evm.model.unitig_4.390 | An15g02380        |
| evm.model.unitig_4.391 | An15g02370        |
| evm.model.unitig_4.392 | An15g02360        |
| evm.model.unitig_4.393 | An15g02350        |
| evm.model.unitig_4.394 | An15g02340        |
| evm.model.unitig_4.395 | An15g02320        |
| evm.model.unitig_4.396 | An15g02300        |
| evm.model.unitig_4.397 | An15g02290        |
| evm.model.unitig_4.398 | An15g02280        |
| evm.model.unitig_4.40  | An15g07480        |
| evm.model.unitig_4.401 | An15g02210        |
| evm.model.unitig_4.402 | An15g02200        |
| evm.model.unitig_4.403 | An15g02190        |
| evm.model.unitig_4.404 | An15g02180        |
| evm.model.unitig_4.405 | An15g02150        |
| evm.model.unitig_4.406 | An15g02140        |
| evm.model.unitig_4.407 | An15g02130        |
| evm.model.unitig_4.408 | An15g02120        |
| evm.model.unitig_4.409 | An15g02110        |
| evm.model.unitig_4.41  | An15g07470        |
| evm.model.unitig_4.410 | An15g02090        |
| evm.model.unitig_4.411 | An15g02080        |
| evm.model.unitig_4.412 | An15g02070        |
| evm.model.unitig_4.414 | An15g02000        |
| evm.model.unitig_4.415 | An15g01990        |
| evm.model.unitig_4.416 | An15g01980        |
| evm.model.unitig_4.417 | An15g01970        |
| evm.model.unitig_4.418 | An15g01960        |
| evm.model.unitig_4.419 | An15g01950        |
| evm.model.unitig_4.42  | An15g07460        |
| evm.model.unitig_4.420 | An15g01940        |

---

---

| Gene ID of H915-1      | Gene ID of 513.88 |
|------------------------|-------------------|
| evm.model.unitig_4.421 | An15g01930        |
| evm.model.unitig_4.422 | An15g01920        |
| evm.model.unitig_4.423 | An15g01910        |
| evm.model.unitig_4.424 | An15g01900        |
| evm.model.unitig_4.425 | An15g01890        |
| evm.model.unitig_4.426 | An15g01870        |
| evm.model.unitig_4.427 | An15g01860        |
| evm.model.unitig_4.428 | An15g01850        |
| evm.model.unitig_4.429 | An15g01840        |
| evm.model.unitig_4.43  | An15g07390        |
| evm.model.unitig_4.430 | An15g01830        |
| evm.model.unitig_4.431 | An15g01810        |
| evm.model.unitig_4.432 | An15g01800        |
| evm.model.unitig_4.433 | An15g01790        |
| evm.model.unitig_4.434 | An15g01780        |
| evm.model.unitig_4.435 | An15g01770        |
| evm.model.unitig_4.436 | An15g01760        |
| evm.model.unitig_4.437 | An15g01750        |
| evm.model.unitig_4.438 | An15g01740        |
| evm.model.unitig_4.439 | An15g01720        |
| evm.model.unitig_4.44  | An15g07370        |
| evm.model.unitig_4.440 | An15g01710        |
| evm.model.unitig_4.441 | An15g01700        |
| evm.model.unitig_4.442 | An15g01690        |
| evm.model.unitig_4.443 | An15g01680        |
| evm.model.unitig_4.444 | An15g01670        |
| evm.model.unitig_4.445 | An15g01650        |
| evm.model.unitig_4.446 | An15g01640        |
| evm.model.unitig_4.447 | An15g01620        |
| evm.model.unitig_4.448 | An15g01600        |
| evm.model.unitig_4.449 | An15g01590        |
| evm.model.unitig_4.45  | An15g07360        |
| evm.model.unitig_4.450 | An15g01580        |
| evm.model.unitig_4.451 | An15g01560        |
| evm.model.unitig_4.452 | An15g01550        |
| evm.model.unitig_4.453 | An15g01530        |
| evm.model.unitig_4.454 | An15g01520        |
| evm.model.unitig_4.455 | An15g01510        |
| evm.model.unitig_4.456 | An15g01500        |
| evm.model.unitig_4.457 | An15g01490        |
| evm.model.unitig_4.458 | An15g01480        |
| evm.model.unitig_4.459 | An15g01470        |
| evm.model.unitig_4.46  | An15g07350        |

---

---

| Gene ID of H915-1      | Gene ID of 513.88 |
|------------------------|-------------------|
| evm.model.unitig_4.460 | An15g01460        |
| evm.model.unitig_4.461 | An15g01450        |
| evm.model.unitig_4.462 | An15g01440        |
| evm.model.unitig_4.463 | An15g01430        |
| evm.model.unitig_4.464 | An15g01420        |
| evm.model.unitig_4.465 | An15g01410        |
| evm.model.unitig_4.466 | An15g01390        |
| evm.model.unitig_4.467 | An15g01380        |
| evm.model.unitig_4.468 | An15g01370        |
| evm.model.unitig_4.469 | An15g01360        |
| evm.model.unitig_4.470 | An15g01350        |
| evm.model.unitig_4.471 | An15g01340        |
| evm.model.unitig_4.472 | An15g01330        |
| evm.model.unitig_4.473 | An15g01320        |
| evm.model.unitig_4.474 | An15g01310        |
| evm.model.unitig_4.475 | An15g01300        |
| evm.model.unitig_4.476 | An15g01290        |
| evm.model.unitig_4.477 | An15g01280        |
| evm.model.unitig_4.478 | An15g01270        |
| evm.model.unitig_4.479 | -                 |
| evm.model.unitig_4.48  | An15g07330        |
| evm.model.unitig_4.480 | An15g01240        |
| evm.model.unitig_4.481 | An15g01230        |
| evm.model.unitig_4.482 | An04g04820        |
| evm.model.unitig_4.483 | An15g01200        |
| evm.model.unitig_4.484 | An15g01180        |
| evm.model.unitig_4.485 | An15g01170        |
| evm.model.unitig_4.486 | An15g01160        |
| evm.model.unitig_4.487 | An15g01155        |
| evm.model.unitig_4.488 | An15g01150        |
| evm.model.unitig_4.489 | An15g01140        |
| evm.model.unitig_4.49  | An12g01680        |
| evm.model.unitig_4.490 | An15g01130        |
| evm.model.unitig_4.491 | An15g01120        |
| evm.model.unitig_4.492 | An15g01110        |
| evm.model.unitig_4.493 | An02g14500        |
| evm.model.unitig_4.494 | An15g01020        |
| evm.model.unitig_4.495 | An15g01000        |
| evm.model.unitig_4.496 | An15g00990        |
| evm.model.unitig_4.497 | An15g00980        |
| evm.model.unitig_4.498 | An15g00970        |
| evm.model.unitig_4.499 | -                 |
| evm.model.unitig_4.5   | An03g03030        |

---

---

| Gene ID of H915-1      | Gene ID of 513.88 |
|------------------------|-------------------|
| evm.model.unitig_4.50  | An15g07300        |
| evm.model.unitig_4.500 | An15g00950        |
| evm.model.unitig_4.501 | An15g00940        |
| evm.model.unitig_4.502 | An15g00930        |
| evm.model.unitig_4.503 | An15g00920        |
| evm.model.unitig_4.504 | An15g00910        |
| evm.model.unitig_4.505 | An15g00900        |
| evm.model.unitig_4.506 | An15g00890        |
| evm.model.unitig_4.507 | An15g00880        |
| evm.model.unitig_4.508 | An15g00870        |
| evm.model.unitig_4.509 | An15g00860        |
| evm.model.unitig_4.510 | An15g00850        |
| evm.model.unitig_4.511 | An15g00840        |
| evm.model.unitig_4.512 | An15g00830        |
| evm.model.unitig_4.513 | An15g00820        |
| evm.model.unitig_4.514 | An15g00810        |
| evm.model.unitig_4.515 | An15g00790        |
| evm.model.unitig_4.516 | An15g00770        |
| evm.model.unitig_4.517 | An15g00750        |
| evm.model.unitig_4.518 | An15g00740        |
| evm.model.unitig_4.519 | An15g00730        |
| evm.model.unitig_4.52  | An15g07260        |
| evm.model.unitig_4.520 | An15g00728        |
| evm.model.unitig_4.521 | An15g00700        |
| evm.model.unitig_4.522 | An15g00690        |
| evm.model.unitig_4.523 | An15g00680        |
| evm.model.unitig_4.524 | An15g00670        |
| evm.model.unitig_4.525 | An15g00660        |
| evm.model.unitig_4.526 | An15g00660        |
| evm.model.unitig_4.527 | An15g00650        |
| evm.model.unitig_4.528 | An15g00640        |
| evm.model.unitig_4.529 | An15g00630        |
| evm.model.unitig_4.53  | An15g07250        |
| evm.model.unitig_4.530 | An15g00620        |
| evm.model.unitig_4.531 | An15g00610        |
| evm.model.unitig_4.532 | An15g00600        |
| evm.model.unitig_4.533 | An15g00590        |
| evm.model.unitig_4.534 | An15g00580        |
| evm.model.unitig_4.535 | An15g00570        |
| evm.model.unitig_4.536 | An15g00560        |
| evm.model.unitig_4.537 | An15g00550        |
| evm.model.unitig_4.538 | An15g00540        |
| evm.model.unitig_4.539 | An15g00530        |

---

---

| Gene ID of H915-1      | Gene ID of 513.88 |
|------------------------|-------------------|
| evm.model.unitig_4.54  | An15g07240        |
| evm.model.unitig_4.540 | An15g00520        |
| evm.model.unitig_4.541 | An15g00510        |
| evm.model.unitig_4.542 | An15g00500        |
| evm.model.unitig_4.543 | An15g00480        |
| evm.model.unitig_4.544 | An15g00470        |
| evm.model.unitig_4.545 | An15g00460        |
| evm.model.unitig_4.546 | An15g00450        |
| evm.model.unitig_4.547 | An15g00440        |
| evm.model.unitig_4.548 | An15g00420        |
| evm.model.unitig_4.549 | An15g00410        |
| evm.model.unitig_4.55  | An15g07230        |
| evm.model.unitig_4.550 | An15g00400        |
| evm.model.unitig_4.551 | An15g00390        |
| evm.model.unitig_4.552 | An15g00390        |
| evm.model.unitig_4.553 | An15g00360        |
| evm.model.unitig_4.554 | An15g00350        |
| evm.model.unitig_4.555 | An15g00340        |
| evm.model.unitig_4.556 | An15g00330        |
| evm.model.unitig_4.557 | An15g00320        |
| evm.model.unitig_4.558 | An15g00310        |
| evm.model.unitig_4.559 | An15g00300        |
| evm.model.unitig_4.56  | An15g07220        |
| evm.model.unitig_4.560 | An15g00290        |
| evm.model.unitig_4.561 | An15g00280        |
| evm.model.unitig_4.562 | An15g00270        |
| evm.model.unitig_4.563 | An15g00260        |
| evm.model.unitig_4.564 | An15g00250        |
| evm.model.unitig_4.565 | An15g00240        |
| evm.model.unitig_4.566 | An15g00230        |
| evm.model.unitig_4.567 | An15g00220        |
| evm.model.unitig_4.568 | An15g00210        |
| evm.model.unitig_4.569 | -                 |
| evm.model.unitig_4.57  | An15g07200        |
| evm.model.unitig_4.570 | An15g00200        |
| evm.model.unitig_4.571 | An15g00190        |
| evm.model.unitig_4.572 | An15g00170        |
| evm.model.unitig_4.573 | An15g00160        |
| evm.model.unitig_4.574 | An15g00150        |
| evm.model.unitig_4.575 | An15g00140        |
| evm.model.unitig_4.576 | An15g00120        |
| evm.model.unitig_4.577 | An15g00110        |
| evm.model.unitig_4.578 | An15g00100        |

---

---

| Gene ID of H915-1      | Gene ID of 513.88 |
|------------------------|-------------------|
| evm.model.unitig_4.579 | An15g00090        |
| evm.model.unitig_4.58  | An15g07190        |
| evm.model.unitig_4.580 | An15g00080        |
| evm.model.unitig_4.581 | An15g00070        |
| evm.model.unitig_4.582 | An15g00050        |
| evm.model.unitig_4.583 | An15g00030        |
| evm.model.unitig_4.584 | An15g00020        |
| evm.model.unitig_4.585 | An15g00010        |
| evm.model.unitig_4.586 | An02g01240        |
| evm.model.unitig_4.59  | An15g07160        |
| evm.model.unitig_4.590 | An13g02130        |
| evm.model.unitig_4.591 | An04g08800        |
| evm.model.unitig_4.594 | An15g05710        |
| evm.model.unitig_4.595 | An03g04570        |
| evm.model.unitig_4.597 | An14g00490        |
| evm.model.unitig_4.6   | An11g03070        |
| evm.model.unitig_4.60  | An15g07150        |
| evm.model.unitig_4.600 | An05g00010        |
| evm.model.unitig_4.601 | An05g00020        |
| evm.model.unitig_4.603 | An05g00040        |
| evm.model.unitig_4.604 | An05g00050        |
| evm.model.unitig_4.605 | An05g00060        |
| evm.model.unitig_4.606 | An05g00070        |
| evm.model.unitig_4.607 | An05g00080        |
| evm.model.unitig_4.608 | An05g00090        |
| evm.model.unitig_4.609 | An05g00100        |
| evm.model.unitig_4.61  | An15g07140        |
| evm.model.unitig_4.610 | An05g00110        |
| evm.model.unitig_4.611 | An05g00120        |
| evm.model.unitig_4.612 | An05g00130        |
| evm.model.unitig_4.613 | An05g00140        |
| evm.model.unitig_4.614 | An05g00160        |
| evm.model.unitig_4.615 | An05g00170        |
| evm.model.unitig_4.616 | An05g00180        |
| evm.model.unitig_4.617 | An05g00190        |
| evm.model.unitig_4.618 | An05g00200        |
| evm.model.unitig_4.619 | An05g00220        |
| evm.model.unitig_4.620 | An05g00280        |
| evm.model.unitig_4.621 | An05g00290        |
| evm.model.unitig_4.622 | An05g00310        |
| evm.model.unitig_4.623 | An05g00340        |
| evm.model.unitig_4.624 | An05g00350        |
| evm.model.unitig_4.625 | An05g00370        |

---



---

| Gene ID of H915-1      | Gene ID of 513.88 |
|------------------------|-------------------|
| evm.model.unitig_4.626 | An05g00390        |
| evm.model.unitig_4.627 | -                 |
| evm.model.unitig_4.628 | An05g00440        |
| evm.model.unitig_4.629 | An05g00480        |
| evm.model.unitig_4.63  | An15g07120        |
| evm.model.unitig_4.630 | -                 |
| evm.model.unitig_4.631 | An05g00490        |
| evm.model.unitig_4.632 | An05g00500        |
| evm.model.unitig_4.633 | An05g00510        |
| evm.model.unitig_4.634 | An05g00520        |
| evm.model.unitig_4.635 | -                 |
| evm.model.unitig_4.636 | An05g00550        |
| evm.model.unitig_4.637 | An05g00570        |
| evm.model.unitig_4.638 | An05g00610        |
| evm.model.unitig_4.639 | An05g00630        |
| evm.model.unitig_4.64  | An15g07110        |
| evm.model.unitig_4.640 | An05g00640        |
| evm.model.unitig_4.641 | An05g00670        |
| evm.model.unitig_4.642 | An05g00690        |
| evm.model.unitig_4.643 | An05g00720        |
| evm.model.unitig_4.644 | An05g00730        |
| evm.model.unitig_4.645 | An05g00760        |
| evm.model.unitig_4.646 | An05g00780        |
| evm.model.unitig_4.647 | An05g00790        |
| evm.model.unitig_4.648 | An05g00820        |
| evm.model.unitig_4.649 | An05g00850        |
| evm.model.unitig_4.65  | An15g07090        |
| evm.model.unitig_4.650 | An05g00870        |
| evm.model.unitig_4.651 | An05g00880        |
| evm.model.unitig_4.652 | An05g00900        |
| evm.model.unitig_4.653 | An05g00930        |
| evm.model.unitig_4.654 | An05g00950        |
| evm.model.unitig_4.655 | An05g00960        |
| evm.model.unitig_4.656 | An05g00970        |
| evm.model.unitig_4.657 | An12g03500        |
| evm.model.unitig_4.659 | An12g03530        |
| evm.model.unitig_4.66  | An15g07080        |
| evm.model.unitig_4.660 | An12g03550        |
| evm.model.unitig_4.661 | An12g03570        |
| evm.model.unitig_4.662 | An12g03580        |
| evm.model.unitig_4.663 | An12g03600        |
| evm.model.unitig_4.664 | An12g03620        |
| evm.model.unitig_4.665 | An12g03650        |

---

---

| Gene ID of H915-1      | Gene ID of 513.88 |
|------------------------|-------------------|
| evm.model.unitig_4.666 | An12g03660        |
| evm.model.unitig_4.667 | An12g03670        |
| evm.model.unitig_4.668 | An12g03700        |
| evm.model.unitig_4.669 | An12g03710        |
| evm.model.unitig_4.67  | An15g07070        |
| evm.model.unitig_4.670 | An12g03720        |
| evm.model.unitig_4.671 | An12g03730        |
| evm.model.unitig_4.672 | An12g03760        |
| evm.model.unitig_4.673 | An12g03760        |
| evm.model.unitig_4.674 | An12g03830        |
| evm.model.unitig_4.675 | An12g03850        |
| evm.model.unitig_4.676 | An02g14290        |
| evm.model.unitig_4.677 | An12g03880        |
| evm.model.unitig_4.678 | An12g03890        |
| evm.model.unitig_4.679 | An12g03900        |
| evm.model.unitig_4.68  | An15g07060        |
| evm.model.unitig_4.680 | An12g03910        |
| evm.model.unitig_4.681 | An12g03920        |
| evm.model.unitig_4.682 | An12g03930        |
| evm.model.unitig_4.683 | An12g03940        |
| evm.model.unitig_4.684 | An12g03950        |
| evm.model.unitig_4.685 | An12g03960        |
| evm.model.unitig_4.686 | An12g03970        |
| evm.model.unitig_4.687 | An12g03990        |
| evm.model.unitig_4.688 | An12g04000        |
| evm.model.unitig_4.689 | An12g04010        |
| evm.model.unitig_4.69  | An15g07050        |
| evm.model.unitig_4.690 | An12g04020        |
| evm.model.unitig_4.691 | An12g04030        |
| evm.model.unitig_4.693 | An12g04050        |
| evm.model.unitig_4.694 | -                 |
| evm.model.unitig_4.695 | An12g04060        |
| evm.model.unitig_4.696 | An12g04070        |
| evm.model.unitig_4.697 | An12g04090        |
| evm.model.unitig_4.698 | An12g04110        |
| evm.model.unitig_4.699 | An12g04120        |
| evm.model.unitig_4.7   | An15g07930        |
| evm.model.unitig_4.70  | An15g07040        |
| evm.model.unitig_4.701 | An12g04140        |
| evm.model.unitig_4.702 | An12g04170        |
| evm.model.unitig_4.703 | An12g04180        |
| evm.model.unitig_4.704 | An12g04190        |
| evm.model.unitig_4.705 | An12g04210        |

---

---

| Gene ID of H915-1      | Gene ID of 513.88 |
|------------------------|-------------------|
| evm.model.unitig_4.706 | An12g04220        |
| evm.model.unitig_4.707 | An12g04250        |
| evm.model.unitig_4.708 | An12g04260        |
| evm.model.unitig_4.709 | An12g04280        |
| evm.model.unitig_4.71  | An08g10830        |
| evm.model.unitig_4.710 | An12g04310        |
| evm.model.unitig_4.711 | An12g04330        |
| evm.model.unitig_4.712 | An12g04340        |
| evm.model.unitig_4.713 | An12g04350        |
| evm.model.unitig_4.714 | An12g04360        |
| evm.model.unitig_4.715 | An12g04370        |
| evm.model.unitig_4.716 | An12g04380        |
| evm.model.unitig_4.717 | An12g04390        |
| evm.model.unitig_4.718 | An12g04450        |
| evm.model.unitig_4.719 | An12g04470        |
| evm.model.unitig_4.72  | An15g07000        |
| evm.model.unitig_4.720 | An12g04480        |
| evm.model.unitig_4.721 | An12g04490        |
| evm.model.unitig_4.722 | An12g04500        |
| evm.model.unitig_4.723 | An12g04510        |
| evm.model.unitig_4.724 | An12g04520        |
| evm.model.unitig_4.725 | An12g10020        |
| evm.model.unitig_4.726 | An12g10020        |
| evm.model.unitig_4.727 | An12g04540        |
| evm.model.unitig_4.728 | An12g04560        |
| evm.model.unitig_4.729 | An12g04570        |
| evm.model.unitig_4.73  | An15g06990        |
| evm.model.unitig_4.730 | An12g04580        |
| evm.model.unitig_4.731 | An12g04590        |
| evm.model.unitig_4.732 | An12g04600        |
| evm.model.unitig_4.733 | An12g04610        |
| evm.model.unitig_4.734 | An12g04620        |
| evm.model.unitig_4.735 | An12g04630        |
| evm.model.unitig_4.736 | An12g04640        |
| evm.model.unitig_4.737 | An12g04650        |
| evm.model.unitig_4.738 | An12g04655        |
| evm.model.unitig_4.739 | An12g04660        |
| evm.model.unitig_4.74  | An15g06980        |
| evm.model.unitig_4.740 | An12g04670        |
| evm.model.unitig_4.741 | An12g04680        |
| evm.model.unitig_4.742 | An12g04690        |
| evm.model.unitig_4.743 | An12g04700        |
| evm.model.unitig_4.744 | An12g04710        |

---

---

| Gene ID of H915-1      | Gene ID of 513.88 |
|------------------------|-------------------|
| evm.model.unitig_4.745 | An12g04720        |
| evm.model.unitig_4.746 | An12g04730        |
| evm.model.unitig_4.747 | An12g04740        |
| evm.model.unitig_4.748 | An12g04750        |
| evm.model.unitig_4.749 | An12g04760        |
| evm.model.unitig_4.75  | An15g06970        |
| evm.model.unitig_4.750 | An12g04770        |
| evm.model.unitig_4.751 | An12g04780        |
| evm.model.unitig_4.752 | An12g04790        |
| evm.model.unitig_4.753 | An12g04800        |
| evm.model.unitig_4.754 | An12g04810        |
| evm.model.unitig_4.755 | An12g04820        |
| evm.model.unitig_4.756 | An12g04830        |
| evm.model.unitig_4.757 | An12g04840        |
| evm.model.unitig_4.758 | An12g04860        |
| evm.model.unitig_4.759 | An12g04870        |
| evm.model.unitig_4.760 | An12g04880        |
| evm.model.unitig_4.761 | An12g04890        |
| evm.model.unitig_4.762 | An12g04910        |
| evm.model.unitig_4.763 | An12g04920        |
| evm.model.unitig_4.764 | An12g04930        |
| evm.model.unitig_4.765 | An12g04900        |
| evm.model.unitig_4.766 | An12g04940        |
| evm.model.unitig_4.767 | An12g04960        |
| evm.model.unitig_4.768 | An12g04960        |
| evm.model.unitig_4.769 | An12g04990        |
| evm.model.unitig_4.77  | An15g06960        |
| evm.model.unitig_4.770 | An12g05000        |
| evm.model.unitig_4.771 | An12g05010        |
| evm.model.unitig_4.772 | An12g05030        |
| evm.model.unitig_4.773 | An12g05050        |
| evm.model.unitig_4.774 | An12g05060        |
| evm.model.unitig_4.775 | An12g05070        |
| evm.model.unitig_4.776 | An12g05080        |
| evm.model.unitig_4.777 | An12g05090        |
| evm.model.unitig_4.778 | An12g05100        |
| evm.model.unitig_4.779 | An12g05110        |
| evm.model.unitig_4.780 | An12g05150        |
| evm.model.unitig_4.781 | An12g05170        |
| evm.model.unitig_4.782 | An12g05180        |
| evm.model.unitig_4.783 | An12g05190        |
| evm.model.unitig_4.784 | An12g05200        |
| evm.model.unitig_4.785 | An12g05210        |

---

---

| Gene ID of H915-1      | Gene ID of 513.88 |
|------------------------|-------------------|
| evm.model.unitig_4.786 | An12g05220        |
| evm.model.unitig_4.787 | An12g05240        |
| evm.model.unitig_4.788 | An12g05250        |
| evm.model.unitig_4.789 | An12g05260        |
| evm.model.unitig_4.79  | An15g06925        |
| evm.model.unitig_4.790 | An12g05280        |
| evm.model.unitig_4.791 | An09g01220        |
| evm.model.unitig_4.792 | An12g05310        |
| evm.model.unitig_4.793 | An12g05320        |
| evm.model.unitig_4.794 | An15g00840        |
| evm.model.unitig_4.795 | An12g05360        |
| evm.model.unitig_4.796 | An12g05370        |
| evm.model.unitig_4.797 | An12g05380        |
| evm.model.unitig_4.798 | An12g05390        |
| evm.model.unitig_4.799 | An12g05400        |
| evm.model.unitig_4.8   | An15g07920        |
| evm.model.unitig_4.80  | An15g06920        |
| evm.model.unitig_4.800 | An12g05420        |
| evm.model.unitig_4.801 | An05g01960        |
| evm.model.unitig_4.802 | An12g05440        |
| evm.model.unitig_4.803 | An18g02760        |
| evm.model.unitig_4.804 | An12g05460        |
| evm.model.unitig_4.805 | An12g05470        |
| evm.model.unitig_4.806 | An12g05490        |
| evm.model.unitig_4.807 | An12g05510        |
| evm.model.unitig_4.808 | An12g05570        |
| evm.model.unitig_4.809 | An12g05580        |
| evm.model.unitig_4.81  | An15g06910        |
| evm.model.unitig_4.810 | An12g05590        |
| evm.model.unitig_4.811 | An12g05600        |
| evm.model.unitig_4.812 | An12g05610        |
| evm.model.unitig_4.813 | An01g14020        |
| evm.model.unitig_4.814 | An13g03050        |
| evm.model.unitig_4.816 | An11g09010        |
| evm.model.unitig_4.817 | An12g05630        |
| evm.model.unitig_4.818 | An12g05640        |
| evm.model.unitig_4.819 | An12g05650        |
| evm.model.unitig_4.82  | An15g06900        |
| evm.model.unitig_4.820 | An12g05660        |
| evm.model.unitig_4.821 | An12g05670        |
| evm.model.unitig_4.822 | An12g05680        |
| evm.model.unitig_4.823 | An12g05700        |
| evm.model.unitig_4.824 | An12g05710        |

---

---

| Gene ID of H915-1      | Gene ID of 513.88 |
|------------------------|-------------------|
| evm.model.unitig_4.825 | An12g05720        |
| evm.model.unitig_4.826 | An12g05740        |
| evm.model.unitig_4.827 | An12g05750        |
| evm.model.unitig_4.828 | An12g05820        |
| evm.model.unitig_4.829 | An12g05830        |
| evm.model.unitig_4.83  | An15g06880        |
| evm.model.unitig_4.830 | An12g05840        |
| evm.model.unitig_4.831 | -                 |
| evm.model.unitig_4.832 | An12g05870        |
| evm.model.unitig_4.834 | An12g05890        |
| evm.model.unitig_4.836 | An12g05930        |
| evm.model.unitig_4.837 | An12g05960        |
| evm.model.unitig_4.838 | An12g05970        |
| evm.model.unitig_4.839 | An12g05990        |
| evm.model.unitig_4.84  | An15g06870        |
| evm.model.unitig_4.840 | An12g06000        |
| evm.model.unitig_4.841 | An12g06010        |
| evm.model.unitig_4.842 | An12g06030        |
| evm.model.unitig_4.843 | An02g11030        |
| evm.model.unitig_4.844 | An12g06050        |
| evm.model.unitig_4.845 | An12g06060        |
| evm.model.unitig_4.846 | An08g01910        |
| evm.model.unitig_4.847 | An03g04820        |
| evm.model.unitig_4.848 | An12g06130        |
| evm.model.unitig_4.85  | An15g06860        |
| evm.model.unitig_4.852 | An12g06180        |
| evm.model.unitig_4.853 | An12g06190        |
| evm.model.unitig_4.854 | An12g06200        |
| evm.model.unitig_4.855 | An12g06250        |
| evm.model.unitig_4.856 | An12g06290        |
| evm.model.unitig_4.857 | An12g06300        |
| evm.model.unitig_4.858 | An12g06310        |
| evm.model.unitig_4.859 | An12g06340        |
| evm.model.unitig_4.86  | An15g06850        |
| evm.model.unitig_4.860 | An12g06350        |
| evm.model.unitig_4.861 | -                 |
| evm.model.unitig_4.862 | An12g06400        |
| evm.model.unitig_4.863 | An12g06440        |
| evm.model.unitig_4.864 | An12g06480        |
| evm.model.unitig_4.865 | An12g06490        |
| evm.model.unitig_4.866 | An12g06500        |
| evm.model.unitig_4.867 | An12g06510        |
| evm.model.unitig_4.868 | An12g06520        |

---

---

| Gene ID of H915-1      | Gene ID of 513.88 |
|------------------------|-------------------|
| evm.model.unitig_4.869 | An12g06530        |
| evm.model.unitig_4.87  | An15g06840        |
| evm.model.unitig_4.870 | An12g06540        |
| evm.model.unitig_4.871 | An12g06550        |
| evm.model.unitig_4.872 | An12g06560        |
| evm.model.unitig_4.873 | An12g06580        |
| evm.model.unitig_4.874 | An12g06590        |
| evm.model.unitig_4.875 | An16g01830        |
| evm.model.unitig_4.876 | An18g00040        |
| evm.model.unitig_4.877 | An01g03030        |
| evm.model.unitig_4.878 | An16g00240        |
| evm.model.unitig_4.879 | An01g03040        |
| evm.model.unitig_4.88  | An15g06820        |
| evm.model.unitig_4.880 | An14g01000        |
| evm.model.unitig_4.881 | An14g01590        |
| evm.model.unitig_4.882 | An02g07550        |
| evm.model.unitig_4.883 | An02g07560        |
| evm.model.unitig_4.884 | An01g11560        |
| evm.model.unitig_4.886 | An11g00680        |
| evm.model.unitig_4.887 | An17g00930        |
| evm.model.unitig_4.888 | An11g05920        |
| evm.model.unitig_4.889 | An12g10950        |
| evm.model.unitig_4.89  | -                 |
| evm.model.unitig_4.890 | An02g08330        |
| evm.model.unitig_4.892 | An12g02850        |
| evm.model.unitig_4.893 | An01g08550        |
| evm.model.unitig_4.894 | An16g02770        |
| evm.model.unitig_4.895 | An01g00630        |
| evm.model.unitig_4.896 | An09g02880        |
| evm.model.unitig_4.898 | An12g07020        |
| evm.model.unitig_4.899 | An12g07060        |
| evm.model.unitig_4.9   | An15g07910        |
| evm.model.unitig_4.90  | An15g06810        |
| evm.model.unitig_4.900 | An12g07070        |
| evm.model.unitig_4.901 | An12g07070        |
| evm.model.unitig_4.902 | An12g07090        |
| evm.model.unitig_4.903 | -                 |
| evm.model.unitig_4.904 | An12g07130        |
| evm.model.unitig_4.905 | An12g07140        |
| evm.model.unitig_4.906 | An12g07150        |
| evm.model.unitig_4.907 | An12g07170        |
| evm.model.unitig_4.908 | An12g07180        |
| evm.model.unitig_4.909 | An12g07190        |

---

---

| Gene ID of H915-1      | Gene ID of 513.88 |
|------------------------|-------------------|
| evm.model.unitig_4.91  | An15g06790        |
| evm.model.unitig_4.911 | An12g07220        |
| evm.model.unitig_4.912 | An12g07230        |
| evm.model.unitig_4.913 | An12g07240        |
| evm.model.unitig_4.914 | An12g07250        |
| evm.model.unitig_4.915 | An12g07260        |
| evm.model.unitig_4.916 | -                 |
| evm.model.unitig_4.917 | An12g07280        |
| evm.model.unitig_4.92  | An15g06780        |
| evm.model.unitig_4.920 | An11g09490        |
| evm.model.unitig_4.922 | An12g06860        |
| evm.model.unitig_4.923 | -                 |
| evm.model.unitig_4.925 | An07g01930        |
| evm.model.unitig_4.928 | An12g06930        |
| evm.model.unitig_4.929 | An12g06670        |
| evm.model.unitig_4.93  | An15g06770        |
| evm.model.unitig_4.931 | An11g03400        |
| evm.model.unitig_4.933 | An12g06610        |
| evm.model.unitig_4.934 | An12g06610        |
| evm.model.unitig_4.935 | An16g04250        |
| evm.model.unitig_4.936 | An12g07300        |
| evm.model.unitig_4.937 | An12g07320        |
| evm.model.unitig_4.938 | An12g07330        |
| evm.model.unitig_4.939 | An12g07360        |
| evm.model.unitig_4.94  | An15g06760        |
| evm.model.unitig_4.940 | An12g07370        |
| evm.model.unitig_4.941 | An12g07380        |
| evm.model.unitig_4.942 | An12g07390        |
| evm.model.unitig_4.943 | An12g07400        |
| evm.model.unitig_4.944 | An12g07420        |
| evm.model.unitig_4.945 | An12g07430        |
| evm.model.unitig_4.946 | An12g07450        |
| evm.model.unitig_4.947 | An12g07490        |
| evm.model.unitig_4.948 | An12g07500        |
| evm.model.unitig_4.949 | An12g07510        |
| evm.model.unitig_4.95  | An15g06750        |
| evm.model.unitig_4.950 | An12g07530        |
| evm.model.unitig_4.951 | An12g07540        |
| evm.model.unitig_4.952 | An12g07550        |
| evm.model.unitig_4.953 | An12g07570        |
| evm.model.unitig_4.954 | An12g07580        |
| evm.model.unitig_4.955 | An12g07590        |
| evm.model.unitig_4.956 | An12g07600        |

---



---

| Gene ID of H915-1      | Gene ID of 513.88 |
|------------------------|-------------------|
| evm.model.unitig_4.957 | An12g07620        |
| evm.model.unitig_4.958 | An12g07630        |
| evm.model.unitig_4.959 | An12g07660        |
| evm.model.unitig_4.96  | An15g06740        |
| evm.model.unitig_4.960 | An12g07670        |
| evm.model.unitig_4.961 | An12g07690        |
| evm.model.unitig_4.963 | An12g07710        |
| evm.model.unitig_4.964 | An12g07715        |
| evm.model.unitig_4.965 | An12g07720        |
| evm.model.unitig_4.966 | An12g07730        |
| evm.model.unitig_4.967 | An12g07740        |
| evm.model.unitig_4.968 | An12g07750        |
| evm.model.unitig_4.969 | An12g07760        |
| evm.model.unitig_4.97  | An15g06730        |
| evm.model.unitig_4.970 | An12g07770        |
| evm.model.unitig_4.971 | An12g07780        |
| evm.model.unitig_4.972 | An12g07800        |
| evm.model.unitig_4.973 | An12g07810        |
| evm.model.unitig_4.974 | An12g07830        |
| evm.model.unitig_4.975 | An12g07840        |
| evm.model.unitig_4.976 | An12g07850        |
| evm.model.unitig_4.977 | An12g07860        |
| evm.model.unitig_4.978 | An12g07870        |
| evm.model.unitig_4.979 | An12g07880        |
| evm.model.unitig_4.98  | An15g06720        |
| evm.model.unitig_4.980 | An12g07900        |
| evm.model.unitig_4.981 | An12g07910        |
| evm.model.unitig_4.982 | An12g07950        |
| evm.model.unitig_4.983 | An12g07960        |
| evm.model.unitig_4.984 | An12g08000        |
| evm.model.unitig_4.985 | -                 |
| evm.model.unitig_4.986 | An12g08020        |
| evm.model.unitig_4.987 | An12g08030        |
| evm.model.unitig_4.988 | An12g08060        |
| evm.model.unitig_4.989 | An12g08090        |
| evm.model.unitig_4.99  | An15g06710        |
| evm.model.unitig_4.990 | An12g08100        |
| evm.model.unitig_4.991 | An12g08110        |
| evm.model.unitig_4.994 | An12g08230        |
| evm.model.unitig_4.995 | An12g08240        |
| evm.model.unitig_4.996 | An12g08260        |
| evm.model.unitig_4.997 | An12g08270        |
| evm.model.unitig_4.998 | An12g08280        |

---

---

| Gene ID of H915-1       | Gene ID of 513.88 |
|-------------------------|-------------------|
| evm.model.unitig_4.999  | An04g09580        |
| evm.model.unitig_5.1    | An19g00100        |
| evm.model.unitig_5.10   | An18g00280        |
| evm.model.unitig_5.100  | An14g06210        |
| evm.model.unitig_5.1000 | An09g01110        |
| evm.model.unitig_5.1001 | An09g01100        |
| evm.model.unitig_5.1002 | An09g01090        |
| evm.model.unitig_5.1003 | An09g01080        |
| evm.model.unitig_5.1004 | An09g01070        |
| evm.model.unitig_5.1005 | An09g01050        |
| evm.model.unitig_5.1006 | An09g01030        |
| evm.model.unitig_5.1007 | An09g01020        |
| evm.model.unitig_5.1008 | An09g01020        |
| evm.model.unitig_5.1009 | An09g01010        |
| evm.model.unitig_5.101  | An14g06200        |
| evm.model.unitig_5.1010 | An09g00800        |
| evm.model.unitig_5.1011 | An09g00810        |
| evm.model.unitig_5.1012 | An09g00820        |
| evm.model.unitig_5.1013 | An09g00830        |
| evm.model.unitig_5.1014 | An09g00840        |
| evm.model.unitig_5.1015 | An09g00850        |
| evm.model.unitig_5.1016 | An09g00860        |
| evm.model.unitig_5.1017 | An09g00870        |
| evm.model.unitig_5.1018 | An09g00880        |
| evm.model.unitig_5.1019 | An09g00890        |
| evm.model.unitig_5.102  | -                 |
| evm.model.unitig_5.1020 | An09g00920        |
| evm.model.unitig_5.1021 | An09g00930        |
| evm.model.unitig_5.1022 | An09g00950        |
| evm.model.unitig_5.1024 | An09g00700        |
| evm.model.unitig_5.1025 | An09g00690        |
| evm.model.unitig_5.1026 | An09g00680        |
| evm.model.unitig_5.1027 | An09g00670        |
| evm.model.unitig_5.1028 | An09g00660        |
| evm.model.unitig_5.1029 | An09g00650        |
| evm.model.unitig_5.103  | An14g06190        |
| evm.model.unitig_5.1030 | An09g00640        |
| evm.model.unitig_5.1031 | An09g00630        |
| evm.model.unitig_5.1032 | An09g00620        |
| evm.model.unitig_5.1033 | An09g00610        |
| evm.model.unitig_5.1034 | An09g00600        |
| evm.model.unitig_5.1035 | An09g00590        |
| evm.model.unitig_5.1036 | An09g00580        |

---

---

| Gene ID of H915-1       | Gene ID of 513.88 |
|-------------------------|-------------------|
| evm.model.unitig_5.1037 | An09g00570        |
| evm.model.unitig_5.1038 | An09g00560        |
| evm.model.unitig_5.1039 | An09g00550        |
| evm.model.unitig_5.104  | An14g06180        |
| evm.model.unitig_5.1040 | An09g00540        |
| evm.model.unitig_5.1041 | An09g00530        |
| evm.model.unitig_5.1042 | An09g00520        |
| evm.model.unitig_5.1043 | An09g00500        |
| evm.model.unitig_5.1044 | -                 |
| evm.model.unitig_5.1045 | An09g00480        |
| evm.model.unitig_5.1046 | An09g00470        |
| evm.model.unitig_5.1047 | An09g00450        |
| evm.model.unitig_5.1048 | -                 |
| evm.model.unitig_5.1049 | An09g00430        |
| evm.model.unitig_5.105  | An14g06170        |
| evm.model.unitig_5.1050 | An09g00420        |
| evm.model.unitig_5.1051 | An09g00400        |
| evm.model.unitig_5.1052 | An09g00390        |
| evm.model.unitig_5.1053 | An09g00380        |
| evm.model.unitig_5.1054 | An09g00380        |
| evm.model.unitig_5.1055 | An09g00380        |
| evm.model.unitig_5.1056 | An09g00360        |
| evm.model.unitig_5.1058 | An09g00320        |
| evm.model.unitig_5.1059 | An09g00310        |
| evm.model.unitig_5.106  | An06g01430        |
| evm.model.unitig_5.1060 | An09g00260        |
| evm.model.unitig_5.1061 | -                 |
| evm.model.unitig_5.1062 | An16g01250        |
| evm.model.unitig_5.1063 | An09g00200        |
| evm.model.unitig_5.1064 | An09g00190        |
| evm.model.unitig_5.1065 | An09g00170        |
| evm.model.unitig_5.1066 | An09g00160        |
| evm.model.unitig_5.1067 | An09g00120        |
| evm.model.unitig_5.1068 | An09g00100        |
| evm.model.unitig_5.1069 | An09g00070        |
| evm.model.unitig_5.107  | An14g06110        |
| evm.model.unitig_5.1070 | An09g00060        |
| evm.model.unitig_5.1071 | An09g00060        |
| evm.model.unitig_5.1072 | An09g00030        |
| evm.model.unitig_5.1073 | An09g00010        |
| evm.model.unitig_5.108  | An14g06100        |
| evm.model.unitig_5.109  | An14g06090        |
| evm.model.unitig_5.11   | An14g07300        |

---

---

| Gene ID of H915-1      | Gene ID of 513.88 |
|------------------------|-------------------|
| evm.model.unitig_5.110 | An14g06070        |
| evm.model.unitig_5.111 | An14g06060        |
| evm.model.unitig_5.112 | An14g06050        |
| evm.model.unitig_5.113 | An14g06040        |
| evm.model.unitig_5.114 | An14g06020        |
| evm.model.unitig_5.115 | An14g06010        |
| evm.model.unitig_5.116 | An14g06000        |
| evm.model.unitig_5.117 | An14g05990        |
| evm.model.unitig_5.118 | An14g05980        |
| evm.model.unitig_5.119 | An14g05970        |
| evm.model.unitig_5.12  | An14g07270        |
| evm.model.unitig_5.120 | An14g05960        |
| evm.model.unitig_5.122 | An14g05920        |
| evm.model.unitig_5.123 | An14g05910        |
| evm.model.unitig_5.124 | An14g05900        |
| evm.model.unitig_5.125 | An14g05890        |
| evm.model.unitig_5.126 | An14g05880        |
| evm.model.unitig_5.127 | An14g05870        |
| evm.model.unitig_5.129 | An14g05850        |
| evm.model.unitig_5.13  | An14g07260        |
| evm.model.unitig_5.130 | An14g05840        |
| evm.model.unitig_5.131 | An14g05830        |
| evm.model.unitig_5.132 | An14g05820        |
| evm.model.unitig_5.133 | An14g05810        |
| evm.model.unitig_5.134 | An14g05800        |
| evm.model.unitig_5.135 | An14g05790        |
| evm.model.unitig_5.136 | An14g05780        |
| evm.model.unitig_5.137 | An14g05765        |
| evm.model.unitig_5.138 | An14g05760        |
| evm.model.unitig_5.139 | An14g05750        |
| evm.model.unitig_5.14  | An01g14450        |
| evm.model.unitig_5.140 | An14g05730        |
| evm.model.unitig_5.141 | An14g05670        |
| evm.model.unitig_5.142 | An14g05630        |
| evm.model.unitig_5.143 | An14g05600        |
| evm.model.unitig_5.144 | An14g05590        |
| evm.model.unitig_5.145 | An14g05580        |
| evm.model.unitig_5.146 | An14g05550        |
| evm.model.unitig_5.147 | An14g05540        |
| evm.model.unitig_5.148 | An14g05530        |
| evm.model.unitig_5.149 | An14g05510        |
| evm.model.unitig_5.15  | An14g07240        |
| evm.model.unitig_5.150 | An14g05500        |

---

---

| Gene ID of H915-1      | Gene ID of 513.88 |
|------------------------|-------------------|
| evm.model.unitig_5.151 | An14g05490        |
| evm.model.unitig_5.152 | An14g05470        |
| evm.model.unitig_5.153 | An14g05460        |
| evm.model.unitig_5.154 | An14g05450        |
| evm.model.unitig_5.155 | An14g05430        |
| evm.model.unitig_5.156 | An14g05420        |
| evm.model.unitig_5.157 | An14g05410        |
| evm.model.unitig_5.158 | An14g05380        |
| evm.model.unitig_5.159 | An14g05370        |
| evm.model.unitig_5.16  | An14g07230        |
| evm.model.unitig_5.160 | An14g05350        |
| evm.model.unitig_5.161 | An14g05340        |
| evm.model.unitig_5.162 | An14g05330        |
| evm.model.unitig_5.163 | An14g05320        |
| evm.model.unitig_5.164 | An14g05310        |
| evm.model.unitig_5.165 | An14g05300        |
| evm.model.unitig_5.166 | An14g05290        |
| evm.model.unitig_5.167 | An14g05280        |
| evm.model.unitig_5.168 | An14g05260        |
| evm.model.unitig_5.169 | An14g05250        |
| evm.model.unitig_5.17  | An14g07220        |
| evm.model.unitig_5.170 | An14g05190        |
| evm.model.unitig_5.171 | An14g05170        |
| evm.model.unitig_5.172 | An14g05160        |
| evm.model.unitig_5.173 | An14g05150        |
| evm.model.unitig_5.174 | An14g05140        |
| evm.model.unitig_5.175 | An14g05130        |
| evm.model.unitig_5.176 | An14g05120        |
| evm.model.unitig_5.177 | An14g05110        |
| evm.model.unitig_5.178 | An14g05100        |
| evm.model.unitig_5.18  | An14g07210        |
| evm.model.unitig_5.180 | An14g05070        |
| evm.model.unitig_5.181 | An14g05050        |
| evm.model.unitig_5.182 | An14g05020        |
| evm.model.unitig_5.183 | An14g05010        |
| evm.model.unitig_5.184 | An14g05000        |
| evm.model.unitig_5.185 | An14g04990        |
| evm.model.unitig_5.186 | An14g04980        |
| evm.model.unitig_5.187 | An14g04970        |
| evm.model.unitig_5.188 | An14g04960        |
| evm.model.unitig_5.189 | An14g04950        |
| evm.model.unitig_5.19  | An14g07200        |
| evm.model.unitig_5.190 | An14g04940        |

---

---

| Gene ID of H915-1      | Gene ID of 513.88 |
|------------------------|-------------------|
| evm.model.unitig_5.191 | An14g04930        |
| evm.model.unitig_5.192 | An14g04920        |
| evm.model.unitig_5.193 | An14g04910        |
| evm.model.unitig_5.195 | An14g04890        |
| evm.model.unitig_5.196 | An14g04880        |
| evm.model.unitig_5.197 | An14g04870        |
| evm.model.unitig_5.198 | An14g04860        |
| evm.model.unitig_5.199 | An14g04840        |
| evm.model.unitig_5.2   | An19g00100        |
| evm.model.unitig_5.20  | An14g07190        |
| evm.model.unitig_5.200 | An14g04830        |
| evm.model.unitig_5.201 | An14g04800        |
| evm.model.unitig_5.202 | An14g04770        |
| evm.model.unitig_5.203 | An14g04760        |
| evm.model.unitig_5.204 | An14g04750        |
| evm.model.unitig_5.205 | An14g04740        |
| evm.model.unitig_5.206 | An14g04730        |
| evm.model.unitig_5.207 | An14g04720        |
| evm.model.unitig_5.208 | An14g04710        |
| evm.model.unitig_5.209 | An14g04680        |
| evm.model.unitig_5.21  | An14g07180        |
| evm.model.unitig_5.210 | An14g04670        |
| evm.model.unitig_5.211 | An14g04650        |
| evm.model.unitig_5.212 | An14g04640        |
| evm.model.unitig_5.213 | An14g04620        |
| evm.model.unitig_5.214 | An14g04590        |
| evm.model.unitig_5.215 | An14g04560        |
| evm.model.unitig_5.216 | An14g04530        |
| evm.model.unitig_5.217 | An04g00830        |
| evm.model.unitig_5.218 | An14g04490        |
| evm.model.unitig_5.220 | An14g04420        |
| evm.model.unitig_5.221 | An14g04410        |
| evm.model.unitig_5.222 | An14g04400        |
| evm.model.unitig_5.223 | An14g04370        |
| evm.model.unitig_5.224 | An14g04340        |
| evm.model.unitig_5.225 | An14g04330        |
| evm.model.unitig_5.226 | An14g04320        |
| evm.model.unitig_5.227 | An14g04300        |
| evm.model.unitig_5.228 | An14g04290        |
| evm.model.unitig_5.229 | An14g04280        |
| evm.model.unitig_5.23  | An14g07160        |
| evm.model.unitig_5.230 | An14g04260        |
| evm.model.unitig_5.231 | An14g04240        |

---

---

| Gene ID of H915-1      | Gene ID of 513.88 |
|------------------------|-------------------|
| evm.model.unitig_5.232 | An14g04210        |
| evm.model.unitig_5.233 | An14g04200        |
| evm.model.unitig_5.234 | An14g04190        |
| evm.model.unitig_5.235 | An14g04180        |
| evm.model.unitig_5.236 | An14g04170        |
| evm.model.unitig_5.237 | An14g04160        |
| evm.model.unitig_5.238 | An14g04140        |
| evm.model.unitig_5.239 | An14g04100        |
| evm.model.unitig_5.24  | An14g07150        |
| evm.model.unitig_5.240 | An14g04090        |
| evm.model.unitig_5.241 | An14g04080        |
| evm.model.unitig_5.242 | An14g04070        |
| evm.model.unitig_5.243 | An14g04060        |
| evm.model.unitig_5.244 | -                 |
| evm.model.unitig_5.245 | An14g04050        |
| evm.model.unitig_5.246 | An14g04040        |
| evm.model.unitig_5.247 | An14g04010        |
| evm.model.unitig_5.248 | An14g04000        |
| evm.model.unitig_5.249 | An14g03990        |
| evm.model.unitig_5.25  | An14g07140        |
| evm.model.unitig_5.250 | An08g04300        |
| evm.model.unitig_5.251 | An14g03950        |
| evm.model.unitig_5.252 | An14g03930        |
| evm.model.unitig_5.253 | An14g03920        |
| evm.model.unitig_5.254 | An14g03910        |
| evm.model.unitig_5.255 | An14g03890        |
| evm.model.unitig_5.256 | An14g03870        |
| evm.model.unitig_5.257 | An14g03850        |
| evm.model.unitig_5.258 | An14g03820        |
| evm.model.unitig_5.259 | An14g03810        |
| evm.model.unitig_5.26  | An14g07130        |
| evm.model.unitig_5.260 | An14g03800        |
| evm.model.unitig_5.261 | An14g03790        |
| evm.model.unitig_5.262 | An14g03780        |
| evm.model.unitig_5.263 | An14g03770        |
| evm.model.unitig_5.264 | An14g03760        |
| evm.model.unitig_5.265 | An14g03740        |
| evm.model.unitig_5.266 | An14g03730        |
| evm.model.unitig_5.267 | An14g03720        |
| evm.model.unitig_5.268 | An14g03710        |
| evm.model.unitig_5.269 | An14g03700        |
| evm.model.unitig_5.27  | An14g07090        |
| evm.model.unitig_5.270 | An14g03660        |

---

---

| Gene ID of H915-1      | Gene ID of 513.88 |
|------------------------|-------------------|
| evm.model.unitig_5.271 | An14g03640        |
| evm.model.unitig_5.272 | An14g03630        |
| evm.model.unitig_5.273 | An14g03620        |
| evm.model.unitig_5.274 | An14g03610        |
| evm.model.unitig_5.275 | An14g03600        |
| evm.model.unitig_5.276 | An14g03590        |
| evm.model.unitig_5.277 | An14g03580        |
| evm.model.unitig_5.278 | An14g03570        |
| evm.model.unitig_5.279 | An14g03560        |
| evm.model.unitig_5.28  | An14g07070        |
| evm.model.unitig_5.280 | An14g03550        |
| evm.model.unitig_5.281 | An14g03530        |
| evm.model.unitig_5.282 | An14g03520        |
| evm.model.unitig_5.283 | An14g03510        |
| evm.model.unitig_5.284 | An14g03500        |
| evm.model.unitig_5.286 | An14g03470        |
| evm.model.unitig_5.287 | An14g03460        |
| evm.model.unitig_5.288 | An14g03450        |
| evm.model.unitig_5.289 | An14g03440        |
| evm.model.unitig_5.29  | An14g07060        |
| evm.model.unitig_5.290 | An14g03430        |
| evm.model.unitig_5.291 | An14g03420        |
| evm.model.unitig_5.292 | An14g03410        |
| evm.model.unitig_5.293 | An14g03400        |
| evm.model.unitig_5.294 | An14g03390        |
| evm.model.unitig_5.295 | An14g03370        |
| evm.model.unitig_5.296 | An14g03360        |
| evm.model.unitig_5.297 | An14g03340        |
| evm.model.unitig_5.298 | An14g03330        |
| evm.model.unitig_5.299 | An14g03310        |
| evm.model.unitig_5.3   | An14g07400        |
| evm.model.unitig_5.30  | An14g07050        |
| evm.model.unitig_5.300 | An14g03300        |
| evm.model.unitig_5.301 | An14g03290        |
| evm.model.unitig_5.302 | An14g03280        |
| evm.model.unitig_5.303 | An14g03270        |
| evm.model.unitig_5.304 | An14g03250        |
| evm.model.unitig_5.305 | An14g03240        |
| evm.model.unitig_5.306 | An13g03440        |
| evm.model.unitig_5.307 | An14g03220        |
| evm.model.unitig_5.308 | An14g03210        |
| evm.model.unitig_5.309 | An14g03200        |
| evm.model.unitig_5.31  | An14g07040        |

---



---

| Gene ID of H915-1      | Gene ID of 513.88 |
|------------------------|-------------------|
| evm.model.unitig_5.310 | An14g03190        |
| evm.model.unitig_5.311 | An14g03160        |
| evm.model.unitig_5.312 | An14g03140        |
| evm.model.unitig_5.313 | An14g03120        |
| evm.model.unitig_5.314 | An14g03110        |
| evm.model.unitig_5.315 | An14g03100        |
| evm.model.unitig_5.316 | An14g03090        |
| evm.model.unitig_5.317 | An14g03080        |
| evm.model.unitig_5.318 | An14g03070        |
| evm.model.unitig_5.319 | An14g03060        |
| evm.model.unitig_5.32  | An14g07030        |
| evm.model.unitig_5.320 | An14g03050        |
| evm.model.unitig_5.321 | An14g03040        |
| evm.model.unitig_5.322 | An14g03030        |
| evm.model.unitig_5.323 | An14g03020        |
| evm.model.unitig_5.324 | An14g03000        |
| evm.model.unitig_5.325 | An14g02990        |
| evm.model.unitig_5.326 | An14g02980        |
| evm.model.unitig_5.327 | An14g02970        |
| evm.model.unitig_5.328 | An14g02960        |
| evm.model.unitig_5.329 | An14g02950        |
| evm.model.unitig_5.33  | An14g07010        |
| evm.model.unitig_5.330 | An14g02940        |
| evm.model.unitig_5.331 | An14g02570        |
| evm.model.unitig_5.332 | An14g02920        |
| evm.model.unitig_5.333 | An14g02910        |
| evm.model.unitig_5.335 | An14g02900        |
| evm.model.unitig_5.336 | An14g02890        |
| evm.model.unitig_5.337 | An14g02880        |
| evm.model.unitig_5.338 | An14g02870        |
| evm.model.unitig_5.339 | An14g02860        |
| evm.model.unitig_5.34  | An11g09000        |
| evm.model.unitig_5.340 | An14g02840        |
| evm.model.unitig_5.341 | An14g02830        |
| evm.model.unitig_5.342 | An01g11750        |
| evm.model.unitig_5.343 | -                 |
| evm.model.unitig_5.346 | An02g09120        |
| evm.model.unitig_5.347 | An14g02780        |
| evm.model.unitig_5.348 | An14g02760        |
| evm.model.unitig_5.349 | An14g02750        |
| evm.model.unitig_5.35  | An14g06980        |
| evm.model.unitig_5.350 | An14g02720        |
| evm.model.unitig_5.351 | An14g02700        |

---

---

| Gene ID of H915-1      | Gene ID of 513.88 |
|------------------------|-------------------|
| evm.model.unitig_5.352 | An14g02670        |
| evm.model.unitig_5.353 | An14g02660        |
| evm.model.unitig_5.354 | An14g02650        |
| evm.model.unitig_5.355 | An14g02640        |
| evm.model.unitig_5.356 | An14g02630        |
| evm.model.unitig_5.357 | An14g02620        |
| evm.model.unitig_5.358 | An14g02610        |
| evm.model.unitig_5.359 | An14g02590        |
| evm.model.unitig_5.36  | An14g06970        |
| evm.model.unitig_5.360 | An14g02570        |
| evm.model.unitig_5.361 | An14g02560        |
| evm.model.unitig_5.362 | An08g12200        |
| evm.model.unitig_5.363 | An14g02540        |
| evm.model.unitig_5.366 | An14g02500        |
| evm.model.unitig_5.367 | An14g02490        |
| evm.model.unitig_5.368 | An14g02470        |
| evm.model.unitig_5.369 | An14g02460        |
| evm.model.unitig_5.37  | An14g06960        |
| evm.model.unitig_5.370 | An14g02450        |
| evm.model.unitig_5.371 | An14g02420        |
| evm.model.unitig_5.372 | An14g02410        |
| evm.model.unitig_5.373 | An14g02390        |
| evm.model.unitig_5.374 | An14g02370        |
| evm.model.unitig_5.375 | An14g02360        |
| evm.model.unitig_5.376 | An14g02350        |
| evm.model.unitig_5.378 | An14g02320        |
| evm.model.unitig_5.379 | An14g02300        |
| evm.model.unitig_5.38  | An14g06950        |
| evm.model.unitig_5.380 | An14g02290        |
| evm.model.unitig_5.381 | An14g02280        |
| evm.model.unitig_5.382 | An14g02260        |
| evm.model.unitig_5.383 | An14g02250        |
| evm.model.unitig_5.384 | An14g02240        |
| evm.model.unitig_5.385 | An14g02230        |
| evm.model.unitig_5.386 | An14g02210        |
| evm.model.unitig_5.387 | An14g02200        |
| evm.model.unitig_5.388 | An14g02190        |
| evm.model.unitig_5.389 | An14g02180        |
| evm.model.unitig_5.390 | An14g02170        |
| evm.model.unitig_5.391 | An14g02160        |
| evm.model.unitig_5.392 | An14g02150        |
| evm.model.unitig_5.393 | -                 |
| evm.model.unitig_5.394 | An14g02130        |

---

---

| Gene ID of H915-1      | Gene ID of 513.88 |
|------------------------|-------------------|
| evm.model.unitig_5.395 | An14g02100        |
| evm.model.unitig_5.396 | An14g02090        |
| evm.model.unitig_5.397 | An14g02080        |
| evm.model.unitig_5.398 | An14g02070        |
| evm.model.unitig_5.399 | An14g02060        |
| evm.model.unitig_5.4   | An14g07390        |
| evm.model.unitig_5.40  | An14g06940        |
| evm.model.unitig_5.400 | An14g02040        |
| evm.model.unitig_5.401 | An15g06750        |
| evm.model.unitig_5.402 | An14g02030        |
| evm.model.unitig_5.403 | An14g02010        |
| evm.model.unitig_5.404 | An14g01990        |
| evm.model.unitig_5.405 | An14g01980        |
| evm.model.unitig_5.406 | An14g01970        |
| evm.model.unitig_5.407 | An14g01960        |
| evm.model.unitig_5.408 | An14g01950        |
| evm.model.unitig_5.409 | An14g01940        |
| evm.model.unitig_5.41  | An14g06930        |
| evm.model.unitig_5.410 | An14g01910        |
| evm.model.unitig_5.411 | An08g08860        |
| evm.model.unitig_5.412 | An13g02880        |
| evm.model.unitig_5.413 | An14g01880        |
| evm.model.unitig_5.414 | An14g01870        |
| evm.model.unitig_5.415 | An14g01860        |
| evm.model.unitig_5.416 | An14g01850        |
| evm.model.unitig_5.417 | An14g01840        |
| evm.model.unitig_5.418 | An14g01820        |
| evm.model.unitig_5.419 | An14g01810        |
| evm.model.unitig_5.42  | An14g06920        |
| evm.model.unitig_5.420 | An14g01800        |
| evm.model.unitig_5.421 | An14g01770        |
| evm.model.unitig_5.422 | An14g01760        |
| evm.model.unitig_5.423 | An14g01730        |
| evm.model.unitig_5.424 | An14g01710        |
| evm.model.unitig_5.425 | An14g01700        |
| evm.model.unitig_5.426 | An14g01690        |
| evm.model.unitig_5.427 | An14g01685        |
| evm.model.unitig_5.428 | An14g01680        |
| evm.model.unitig_5.429 | An14g01670        |
| evm.model.unitig_5.43  | An14g06910        |
| evm.model.unitig_5.430 | An14g01660        |
| evm.model.unitig_5.431 | An14g01630        |
| evm.model.unitig_5.432 | An14g01620        |

---

---

| Gene ID of H915-1      | Gene ID of 513.88 |
|------------------------|-------------------|
| evm.model.unitig_5.434 | An14g01600        |
| evm.model.unitig_5.435 | An14g01590        |
| evm.model.unitig_5.436 | An14g01580        |
| evm.model.unitig_5.437 | An14g01570        |
| evm.model.unitig_5.438 | An14g01560        |
| evm.model.unitig_5.439 | An14g01550        |
| evm.model.unitig_5.44  | An14g06900        |
| evm.model.unitig_5.440 | An14g01540        |
| evm.model.unitig_5.441 | An14g01530        |
| evm.model.unitig_5.442 | An14g01500        |
| evm.model.unitig_5.443 | An14g01490        |
| evm.model.unitig_5.444 | An14g01480        |
| evm.model.unitig_5.445 | An14g01440        |
| evm.model.unitig_5.446 | An14g01450        |
| evm.model.unitig_5.447 | An14g01460        |
| evm.model.unitig_5.448 | An14g01470        |
| evm.model.unitig_5.449 | An14g01430        |
| evm.model.unitig_5.45  | An14g06890        |
| evm.model.unitig_5.450 | An14g01420        |
| evm.model.unitig_5.451 | An14g01410        |
| evm.model.unitig_5.452 | An14g01390        |
| evm.model.unitig_5.453 | An14g01380        |
| evm.model.unitig_5.454 | An14g01370        |
| evm.model.unitig_5.456 | An14g01330        |
| evm.model.unitig_5.457 | An14g01280        |
| evm.model.unitig_5.458 | An14g01255        |
| evm.model.unitig_5.459 | An14g01253        |
| evm.model.unitig_5.46  | An14g06880        |
| evm.model.unitig_5.460 | An14g01245        |
| evm.model.unitig_5.461 | An14g01235        |
| evm.model.unitig_5.462 | An02g02250        |
| evm.model.unitig_5.463 | An14g01210        |
| evm.model.unitig_5.464 | An14g01190        |
| evm.model.unitig_5.465 | An14g01180        |
| evm.model.unitig_5.466 | An14g01180        |
| evm.model.unitig_5.467 | An14g01170        |
| evm.model.unitig_5.468 | An14g01160        |
| evm.model.unitig_5.469 | An14g01150        |
| evm.model.unitig_5.47  | -                 |
| evm.model.unitig_5.470 | An14g01140        |
| evm.model.unitig_5.471 | An14g01130        |
| evm.model.unitig_5.472 | An14g01120        |
| evm.model.unitig_5.473 | An14g01110        |

---

---

| Gene ID of H915-1      | Gene ID of 513.88 |
|------------------------|-------------------|
| evm.model.unitig_5.474 | An14g01080        |
| evm.model.unitig_5.476 | An14g01070        |
| evm.model.unitig_5.477 | An14g01068        |
| evm.model.unitig_5.478 | An14g01060        |
| evm.model.unitig_5.479 | An14g01050        |
| evm.model.unitig_5.48  | An14g06870        |
| evm.model.unitig_5.480 | An14g01030        |
| evm.model.unitig_5.481 | An14g01020        |
| evm.model.unitig_5.482 | An14g01010        |
| evm.model.unitig_5.483 | An14g01000        |
| evm.model.unitig_5.484 | An14g00990        |
| evm.model.unitig_5.485 | An14g00980        |
| evm.model.unitig_5.486 | An14g00970        |
| evm.model.unitig_5.487 | An14g00960        |
| evm.model.unitig_5.488 | An14g00950        |
| evm.model.unitig_5.489 | An14g00940        |
| evm.model.unitig_5.49  | An14g06860        |
| evm.model.unitig_5.490 | An14g00930        |
| evm.model.unitig_5.491 | An14g00920        |
| evm.model.unitig_5.492 | An14g00900        |
| evm.model.unitig_5.493 | An14g00890        |
| evm.model.unitig_5.494 | An14g00880        |
| evm.model.unitig_5.495 | An14g00870        |
| evm.model.unitig_5.496 | An14g00860        |
| evm.model.unitig_5.497 | An14g00850        |
| evm.model.unitig_5.498 | An14g00840        |
| evm.model.unitig_5.499 | An14g00830        |
| evm.model.unitig_5.5   | An14g07380        |
| evm.model.unitig_5.50  | An14g06850        |
| evm.model.unitig_5.500 | An14g00810        |
| evm.model.unitig_5.501 | An14g00800        |
| evm.model.unitig_5.502 | An14g00780        |
| evm.model.unitig_5.503 | An14g00770        |
| evm.model.unitig_5.504 | An14g00760        |
| evm.model.unitig_5.505 | An14g00750        |
| evm.model.unitig_5.506 | An14g00740        |
| evm.model.unitig_5.507 | An14g00710        |
| evm.model.unitig_5.508 | An14g00700        |
| evm.model.unitig_5.509 | An14g00690        |
| evm.model.unitig_5.51  | An14g06840        |
| evm.model.unitig_5.510 | An14g00680        |
| evm.model.unitig_5.511 | An14g00670        |
| evm.model.unitig_5.512 | An14g00660        |

---

---

| Gene ID of H915-1      | Gene ID of 513.88 |
|------------------------|-------------------|
| evm.model.unitig_5.513 | An14g00640        |
| evm.model.unitig_5.514 | An14g00630        |
| evm.model.unitig_5.515 | An14g00620        |
| evm.model.unitig_5.516 | An14g00610        |
| evm.model.unitig_5.517 | An14g00600        |
| evm.model.unitig_5.518 | An14g00590        |
| evm.model.unitig_5.519 | An14g00580        |
| evm.model.unitig_5.52  | An14g06830        |
| evm.model.unitig_5.520 | An14g00570        |
| evm.model.unitig_5.521 | -                 |
| evm.model.unitig_5.522 | An14g00560        |
| evm.model.unitig_5.524 | An14g00550        |
| evm.model.unitig_5.525 | An14g00540        |
| evm.model.unitig_5.526 | An14g00530        |
| evm.model.unitig_5.527 | An14g00520        |
| evm.model.unitig_5.528 | An14g00510        |
| evm.model.unitig_5.529 | An14g00500        |
| evm.model.unitig_5.53  | An14g06820        |
| evm.model.unitig_5.530 | An14g00480        |
| evm.model.unitig_5.532 | An14g00460        |
| evm.model.unitig_5.534 | An14g00440        |
| evm.model.unitig_5.535 | An14g00430        |
| evm.model.unitig_5.536 | An14g00420        |
| evm.model.unitig_5.537 | An14g00410        |
| evm.model.unitig_5.538 | An14g00400        |
| evm.model.unitig_5.539 | An14g00390        |
| evm.model.unitig_5.54  | An14g06810        |
| evm.model.unitig_5.540 | An14g00380        |
| evm.model.unitig_5.541 | An14g00370        |
| evm.model.unitig_5.542 | An14g00360        |
| evm.model.unitig_5.543 | An14g00350        |
| evm.model.unitig_5.544 | An14g00340        |
| evm.model.unitig_5.545 | An14g00330        |
| evm.model.unitig_5.546 | An14g00320        |
| evm.model.unitig_5.547 | An14g00310        |
| evm.model.unitig_5.548 | An14g00300        |
| evm.model.unitig_5.549 | An14g00290        |
| evm.model.unitig_5.55  | An14g06800        |
| evm.model.unitig_5.550 | An14g00280        |
| evm.model.unitig_5.551 | An14g00270        |
| evm.model.unitig_5.552 | An14g00260        |
| evm.model.unitig_5.553 | An14g00250        |
| evm.model.unitig_5.554 | An14g00240        |

---

---

| Gene ID of H915-1      | Gene ID of 513.88 |
|------------------------|-------------------|
| evm.model.unitig_5.555 | An14g00230        |
| evm.model.unitig_5.556 | An14g00220        |
| evm.model.unitig_5.557 | An14g00200        |
| evm.model.unitig_5.558 | An14g00190        |
| evm.model.unitig_5.559 | An14g00180        |
| evm.model.unitig_5.56  | An14g06790        |
| evm.model.unitig_5.560 | An14g00170        |
| evm.model.unitig_5.561 | An14g00160        |
| evm.model.unitig_5.562 | An14g00150        |
| evm.model.unitig_5.563 | An14g00130        |
| evm.model.unitig_5.564 | An14g00130        |
| evm.model.unitig_5.565 | An14g00110        |
| evm.model.unitig_5.566 | An14g00100        |
| evm.model.unitig_5.567 | An14g00090        |
| evm.model.unitig_5.568 | An14g00080        |
| evm.model.unitig_5.569 | An14g00070        |
| evm.model.unitig_5.57  | An14g06780        |
| evm.model.unitig_5.570 | An14g00060        |
| evm.model.unitig_5.571 | An14g00040        |
| evm.model.unitig_5.572 | An14g00020        |
| evm.model.unitig_5.573 | An14g00010        |
| evm.model.unitig_5.575 | An03g06410        |
| evm.model.unitig_5.579 | An07g07340        |
| evm.model.unitig_5.58  | An14g06770        |
| evm.model.unitig_5.580 | An09g06870        |
| evm.model.unitig_5.581 | An09g06860        |
| evm.model.unitig_5.582 | An09g06850        |
| evm.model.unitig_5.583 | An09g06840        |
| evm.model.unitig_5.584 | An09g06830        |
| evm.model.unitig_5.585 | An09g06810        |
| evm.model.unitig_5.586 | An09g06800        |
| evm.model.unitig_5.587 | An09g06790        |
| evm.model.unitig_5.588 | An09g06780        |
| evm.model.unitig_5.589 | An09g06770        |
| evm.model.unitig_5.59  | An14g06760        |
| evm.model.unitig_5.590 | An09g06760        |
| evm.model.unitig_5.591 | An09g06750        |
| evm.model.unitig_5.592 | An09g06740        |
| evm.model.unitig_5.593 | An09g06730        |
| evm.model.unitig_5.594 | An09g06720        |
| evm.model.unitig_5.595 | An09g06710        |
| evm.model.unitig_5.596 | An09g06700        |
| evm.model.unitig_5.597 | An09g06680        |

---

---

| Gene ID of H915-1      | Gene ID of 513.88 |
|------------------------|-------------------|
| evm.model.unitig_5.598 | An09g06670        |
| evm.model.unitig_5.599 | An09g06650        |
| evm.model.unitig_5.6   | An14g07360        |
| evm.model.unitig_5.60  | An14g06750        |
| evm.model.unitig_5.600 | An09g06640        |
| evm.model.unitig_5.601 | An09g06630        |
| evm.model.unitig_5.602 | An09g06610        |
| evm.model.unitig_5.603 | An09g06590        |
| evm.model.unitig_5.604 | An09g06580        |
| evm.model.unitig_5.605 | An09g06570        |
| evm.model.unitig_5.606 | An09g06550        |
| evm.model.unitig_5.607 | An09g06540        |
| evm.model.unitig_5.608 | An09g06530        |
| evm.model.unitig_5.609 | An09g06520        |
| evm.model.unitig_5.61  | An14g06740        |
| evm.model.unitig_5.610 | An09g06510        |
| evm.model.unitig_5.611 | An09g06500        |
| evm.model.unitig_5.612 | An09g06490        |
| evm.model.unitig_5.613 | An09g06480        |
| evm.model.unitig_5.614 | An09g06460        |
| evm.model.unitig_5.615 | An09g06450        |
| evm.model.unitig_5.616 | An09g06440        |
| evm.model.unitig_5.617 | An09g06430        |
| evm.model.unitig_5.618 | An09g06420        |
| evm.model.unitig_5.619 | An09g06410        |
| evm.model.unitig_5.62  | An14g06730        |
| evm.model.unitig_5.620 | An09g06400        |
| evm.model.unitig_5.621 | An09g06390        |
| evm.model.unitig_5.622 | An09g06380        |
| evm.model.unitig_5.623 | An09g06370        |
| evm.model.unitig_5.624 | An09g06360        |
| evm.model.unitig_5.625 | An09g06350        |
| evm.model.unitig_5.626 | An09g06330        |
| evm.model.unitig_5.627 | An09g06330        |
| evm.model.unitig_5.628 | An09g06320        |
| evm.model.unitig_5.629 | An09g06310        |
| evm.model.unitig_5.63  | An14g06720        |
| evm.model.unitig_5.630 | An09g06290        |
| evm.model.unitig_5.631 | An09g06280        |
| evm.model.unitig_5.632 | An09g06270        |
| evm.model.unitig_5.633 | An09g06260        |
| evm.model.unitig_5.634 | An09g06250        |
| evm.model.unitig_5.635 | An09g06240        |

---



---

| Gene ID of H915-1      | Gene ID of 513.88 |
|------------------------|-------------------|
| evm.model.unitig_5.636 | An09g06220        |
| evm.model.unitig_5.637 | An09g06210        |
| evm.model.unitig_5.638 | An09g06180        |
| evm.model.unitig_5.639 | An09g06160        |
| evm.model.unitig_5.64  | An14g06700        |
| evm.model.unitig_5.640 | An09g06150        |
| evm.model.unitig_5.641 | An09g06140        |
| evm.model.unitig_5.642 | An09g06130        |
| evm.model.unitig_5.643 | An09g06120        |
| evm.model.unitig_5.644 | An09g06110        |
| evm.model.unitig_5.645 | An09g06100        |
| evm.model.unitig_5.646 | An03g04890        |
| evm.model.unitig_5.647 | An09g06070        |
| evm.model.unitig_5.648 | An09g06050        |
| evm.model.unitig_5.649 | An09g06040        |
| evm.model.unitig_5.65  | An14g06680        |
| evm.model.unitig_5.650 | An09g06030        |
| evm.model.unitig_5.651 | -                 |
| evm.model.unitig_5.652 | An09g06020        |
| evm.model.unitig_5.653 | An09g06010        |
| evm.model.unitig_5.654 | An09g06000        |
| evm.model.unitig_5.655 | An09g05990        |
| evm.model.unitig_5.656 | An09g05980        |
| evm.model.unitig_5.657 | An09g05970        |
| evm.model.unitig_5.658 | An09g05950        |
| evm.model.unitig_5.659 | An09g05940        |
| evm.model.unitig_5.66  | An14g06670        |
| evm.model.unitig_5.660 | An09g05920        |
| evm.model.unitig_5.661 | An09g05900        |
| evm.model.unitig_5.662 | An09g05880        |
| evm.model.unitig_5.663 | An09g05870        |
| evm.model.unitig_5.664 | An09g05860        |
| evm.model.unitig_5.665 | An09g05850        |
| evm.model.unitig_5.666 | An09g05840        |
| evm.model.unitig_5.667 | An09g05830        |
| evm.model.unitig_5.668 | An09g05800        |
| evm.model.unitig_5.669 | An09g05780        |
| evm.model.unitig_5.67  | An14g06640        |
| evm.model.unitig_5.670 | An09g05770        |
| evm.model.unitig_5.671 | An09g05760        |
| evm.model.unitig_5.672 | An09g05730        |
| evm.model.unitig_5.673 | An09g05710        |
| evm.model.unitig_5.674 | An09g05700        |

---

---

| Gene ID of H915-1      | Gene ID of 513.88 |
|------------------------|-------------------|
| evm.model.unitig_5.675 | An09g05690        |
| evm.model.unitig_5.676 | An09g05680        |
| evm.model.unitig_5.677 | An09g05670        |
| evm.model.unitig_5.678 | An09g05660        |
| evm.model.unitig_5.679 | An09g05655        |
| evm.model.unitig_5.68  | An14g06630        |
| evm.model.unitig_5.680 | An09g05650        |
| evm.model.unitig_5.681 | An09g05640        |
| evm.model.unitig_5.682 | An09g05630        |
| evm.model.unitig_5.683 | An09g05610        |
| evm.model.unitig_5.684 | An09g05600        |
| evm.model.unitig_5.685 | An09g05590        |
| evm.model.unitig_5.686 | An09g05580        |
| evm.model.unitig_5.687 | An09g05550        |
| evm.model.unitig_5.688 | An09g05540        |
| evm.model.unitig_5.689 | An09g05530        |
| evm.model.unitig_5.69  | An14g06610        |
| evm.model.unitig_5.690 | An09g05490        |
| evm.model.unitig_5.691 | An09g05490        |
| evm.model.unitig_5.692 | An09g05480        |
| evm.model.unitig_5.693 | An09g05460        |
| evm.model.unitig_5.694 | An09g05420        |
| evm.model.unitig_5.695 | An09g05410        |
| evm.model.unitig_5.696 | An09g05400        |
| evm.model.unitig_5.697 | An09g05380        |
| evm.model.unitig_5.698 | An09g05370        |
| evm.model.unitig_5.699 | An09g05350        |
| evm.model.unitig_5.7   | An14g07350        |
| evm.model.unitig_5.70  | An14g06600        |
| evm.model.unitig_5.700 | An09g05340        |
| evm.model.unitig_5.701 | An09g05330        |
| evm.model.unitig_5.702 | An09g05320        |
| evm.model.unitig_5.703 | An09g05310        |
| evm.model.unitig_5.704 | An09g05300        |
| evm.model.unitig_5.705 | An09g05290        |
| evm.model.unitig_5.706 | An09g05280        |
| evm.model.unitig_5.707 | An09g05270        |
| evm.model.unitig_5.708 | An09g05260        |
| evm.model.unitig_5.709 | An09g05250        |
| evm.model.unitig_5.71  | An14g06590        |
| evm.model.unitig_5.710 | An09g05240        |
| evm.model.unitig_5.711 | An09g05230        |
| evm.model.unitig_5.712 | An09g05220        |

---

---

| Gene ID of H915-1      | Gene ID of 513.88 |
|------------------------|-------------------|
| evm.model.unitig_5.713 | An09g05200        |
| evm.model.unitig_5.714 | An09g05180        |
| evm.model.unitig_5.715 | An09g05170        |
| evm.model.unitig_5.716 | An09g05150        |
| evm.model.unitig_5.717 | An09g05140        |
| evm.model.unitig_5.718 | An09g05130        |
| evm.model.unitig_5.719 | An09g05120        |
| evm.model.unitig_5.72  | An14g06590        |
| evm.model.unitig_5.720 | An09g05110        |
| evm.model.unitig_5.721 | An09g05100        |
| evm.model.unitig_5.722 | An09g05080        |
| evm.model.unitig_5.723 | An09g05070        |
| evm.model.unitig_5.724 | An09g05060        |
| evm.model.unitig_5.726 | An09g05040        |
| evm.model.unitig_5.727 | An09g05010        |
| evm.model.unitig_5.728 | An09g05000        |
| evm.model.unitig_5.729 | An09g04990        |
| evm.model.unitig_5.73  | An14g06580        |
| evm.model.unitig_5.730 | An09g04980        |
| evm.model.unitig_5.731 | An09g04970        |
| evm.model.unitig_5.732 | An09g04950        |
| evm.model.unitig_5.733 | -                 |
| evm.model.unitig_5.734 | An09g04910        |
| evm.model.unitig_5.735 | An09g04900        |
| evm.model.unitig_5.736 | An09g04890        |
| evm.model.unitig_5.737 | An09g04880        |
| evm.model.unitig_5.738 | An09g04870        |
| evm.model.unitig_5.739 | An09g04860        |
| evm.model.unitig_5.74  | An14g06560        |
| evm.model.unitig_5.740 | An09g04850        |
| evm.model.unitig_5.741 | An09g04840        |
| evm.model.unitig_5.742 | An09g04830        |
| evm.model.unitig_5.743 | An09g04820        |
| evm.model.unitig_5.744 | An09g04810        |
| evm.model.unitig_5.745 | An09g04790        |
| evm.model.unitig_5.746 | An09g04780        |
| evm.model.unitig_5.747 | An09g04730        |
| evm.model.unitig_5.748 | An09g04710        |
| evm.model.unitig_5.749 | An09g04690        |
| evm.model.unitig_5.75  | An14g06550        |
| evm.model.unitig_5.750 | An09g04680        |
| evm.model.unitig_5.751 | An09g04660        |
| evm.model.unitig_5.752 | An09g04650        |

---

---

| Gene ID of H915-1      | Gene ID of 513.88 |
|------------------------|-------------------|
| evm.model.unitig_5.753 | An09g04640        |
| evm.model.unitig_5.754 | An09g04620        |
| evm.model.unitig_5.755 | An09g04600        |
| evm.model.unitig_5.756 | An09g04590        |
| evm.model.unitig_5.757 | An09g04580        |
| evm.model.unitig_5.759 | An09g04540        |
| evm.model.unitig_5.76  | An14g06540        |
| evm.model.unitig_5.760 | An09g04530        |
| evm.model.unitig_5.761 | An09g04520        |
| evm.model.unitig_5.762 | An09g04510        |
| evm.model.unitig_5.763 | -                 |
| evm.model.unitig_5.764 | An09g04470        |
| evm.model.unitig_5.765 | An09g04440        |
| evm.model.unitig_5.767 | An09g04390        |
| evm.model.unitig_5.768 | An09g04380        |
| evm.model.unitig_5.769 | An09g04370        |
| evm.model.unitig_5.77  | An14g06530        |
| evm.model.unitig_5.770 | An09g04360        |
| evm.model.unitig_5.771 | An09g04300        |
| evm.model.unitig_5.772 | An09g04280        |
| evm.model.unitig_5.773 | An09g04250        |
| evm.model.unitig_5.774 | An09g04240        |
| evm.model.unitig_5.775 | An09g04230        |
| evm.model.unitig_5.776 | An09g04200        |
| evm.model.unitig_5.777 | An09g04190        |
| evm.model.unitig_5.778 | An09g04180        |
| evm.model.unitig_5.779 | An09g04170        |
| evm.model.unitig_5.78  | An14g06530        |
| evm.model.unitig_5.780 | An09g04150        |
| evm.model.unitig_5.781 | An09g04130        |
| evm.model.unitig_5.782 | An09g04120        |
| evm.model.unitig_5.783 | An09g04110        |
| evm.model.unitig_5.784 | An09g04100        |
| evm.model.unitig_5.785 | An09g04090        |
| evm.model.unitig_5.786 | An09g04080        |
| evm.model.unitig_5.787 | An09g04070        |
| evm.model.unitig_5.788 | An09g04050        |
| evm.model.unitig_5.789 | An09g04010        |
| evm.model.unitig_5.79  | An14g06500        |
| evm.model.unitig_5.790 | An09g04000        |
| evm.model.unitig_5.791 | An09g03980        |
| evm.model.unitig_5.792 | -                 |
| evm.model.unitig_5.793 | An09g03970        |

---

---

| Gene ID of H915-1      | Gene ID of 513.88 |
|------------------------|-------------------|
| evm.model.unitig_5.794 | An09g03960        |
| evm.model.unitig_5.795 | An09g03950        |
| evm.model.unitig_5.796 | An09g03940        |
| evm.model.unitig_5.797 | An09g03930        |
| evm.model.unitig_5.798 | An09g03920        |
| evm.model.unitig_5.799 | An11g05770        |
| evm.model.unitig_5.8   | An14g07330        |
| evm.model.unitig_5.80  | An14g06480        |
| evm.model.unitig_5.800 | An09g03900        |
| evm.model.unitig_5.801 | An09g03890        |
| evm.model.unitig_5.802 | An09g03880        |
| evm.model.unitig_5.803 | An09g03870        |
| evm.model.unitig_5.804 | An09g03860        |
| evm.model.unitig_5.805 | An09g03850        |
| evm.model.unitig_5.806 | An11g02830        |
| evm.model.unitig_5.807 | An09g03830        |
| evm.model.unitig_5.808 | An09g03820        |
| evm.model.unitig_5.809 | An09g03810        |
| evm.model.unitig_5.81  | An14g06470        |
| evm.model.unitig_5.810 | An09g03800        |
| evm.model.unitig_5.811 | An09g03790        |
| evm.model.unitig_5.812 | An09g03780        |
| evm.model.unitig_5.813 | An09g03770        |
| evm.model.unitig_5.814 | An09g03760        |
| evm.model.unitig_5.815 | An09g03750        |
| evm.model.unitig_5.816 | An09g03740        |
| evm.model.unitig_5.817 | An09g03730        |
| evm.model.unitig_5.818 | An09g03720        |
| evm.model.unitig_5.819 | An09g03710        |
| evm.model.unitig_5.82  | An14g06460        |
| evm.model.unitig_5.820 | An09g03700        |
| evm.model.unitig_5.821 | An09g03660        |
| evm.model.unitig_5.822 | An09g03640        |
| evm.model.unitig_5.823 | An09g03630        |
| evm.model.unitig_5.824 | An09g03620        |
| evm.model.unitig_5.825 | -                 |
| evm.model.unitig_5.826 | An09g03600        |
| evm.model.unitig_5.827 | An09g03560        |
| evm.model.unitig_5.828 | An09g03530        |
| evm.model.unitig_5.829 | An09g03510        |
| evm.model.unitig_5.83  | An14g06450        |
| evm.model.unitig_5.830 | An11g05350        |
| evm.model.unitig_5.831 | An09g03500        |

---

---

| Gene ID of H915-1      | Gene ID of 513.88 |
|------------------------|-------------------|
| evm.model.unitig_5.832 | An09g03490        |
| evm.model.unitig_5.833 | An09g03470        |
| evm.model.unitig_5.834 | An09g03450        |
| evm.model.unitig_5.835 | An09g03440        |
| evm.model.unitig_5.837 | An09g03380        |
| evm.model.unitig_5.838 | An08g07270        |
| evm.model.unitig_5.839 | An09g03350        |
| evm.model.unitig_5.84  | An14g06440        |
| evm.model.unitig_5.840 | An09g03340        |
| evm.model.unitig_5.841 | An09g03330        |
| evm.model.unitig_5.842 | An09g03320        |
| evm.model.unitig_5.843 | An09g03300        |
| evm.model.unitig_5.844 | An09g03290        |
| evm.model.unitig_5.845 | An09g03270        |
| evm.model.unitig_5.846 | An09g03260        |
| evm.model.unitig_5.847 | An09g03250        |
| evm.model.unitig_5.848 | An09g03240        |
| evm.model.unitig_5.849 | An09g03230        |
| evm.model.unitig_5.85  | An14g06430        |
| evm.model.unitig_5.850 | An09g03210        |
| evm.model.unitig_5.851 | An09g03200        |
| evm.model.unitig_5.852 | An09g03170        |
| evm.model.unitig_5.853 | An09g03160        |
| evm.model.unitig_5.854 | An09g03140        |
| evm.model.unitig_5.855 | An09g03130        |
| evm.model.unitig_5.856 | An09g03120        |
| evm.model.unitig_5.857 | An09g03110        |
| evm.model.unitig_5.858 | An09g03100        |
| evm.model.unitig_5.859 | An09g03070        |
| evm.model.unitig_5.86  | An14g06360        |
| evm.model.unitig_5.860 | An09g03050        |
| evm.model.unitig_5.861 | An09g03050        |
| evm.model.unitig_5.862 | -                 |
| evm.model.unitig_5.863 | An09g03040        |
| evm.model.unitig_5.864 | An09g03030        |
| evm.model.unitig_5.865 | An09g03020        |
| evm.model.unitig_5.866 | An09g03010        |
| evm.model.unitig_5.867 | An09g02990        |
| evm.model.unitig_5.868 | An09g02980        |
| evm.model.unitig_5.869 | An09g02930        |
| evm.model.unitig_5.87  | An14g06350        |
| evm.model.unitig_5.870 | An09g02920        |
| evm.model.unitig_5.872 | An09g02910        |

---

---

| Gene ID of H915-1      | Gene ID of 513.88 |
|------------------------|-------------------|
| evm.model.unitig_5.873 | -                 |
| evm.model.unitig_5.874 | An09g02900        |
| evm.model.unitig_5.875 | An09g02890        |
| evm.model.unitig_5.876 | An09g02880        |
| evm.model.unitig_5.877 | An09g02870        |
| evm.model.unitig_5.878 | An09g02860        |
| evm.model.unitig_5.879 | An09g02840        |
| evm.model.unitig_5.88  | An14g06340        |
| evm.model.unitig_5.880 | An09g02830        |
| evm.model.unitig_5.881 | An09g02820        |
| evm.model.unitig_5.882 | An09g02810        |
| evm.model.unitig_5.883 | -                 |
| evm.model.unitig_5.884 | An09g02800        |
| evm.model.unitig_5.885 | An09g02790        |
| evm.model.unitig_5.886 | An09g02780        |
| evm.model.unitig_5.887 | An09g02770        |
| evm.model.unitig_5.888 | An09g02740        |
| evm.model.unitig_5.889 | An09g02730        |
| evm.model.unitig_5.89  | An14g06330        |
| evm.model.unitig_5.890 | An09g02720        |
| evm.model.unitig_5.891 | An09g02710        |
| evm.model.unitig_5.892 | An09g02700        |
| evm.model.unitig_5.893 | An09g02660        |
| evm.model.unitig_5.894 | An09g02610        |
| evm.model.unitig_5.895 | An09g02580        |
| evm.model.unitig_5.896 | An09g02580        |
| evm.model.unitig_5.897 | An09g02560        |
| evm.model.unitig_5.898 | An09g02550        |
| evm.model.unitig_5.899 | An09g02540        |
| evm.model.unitig_5.9   | An14g07320        |
| evm.model.unitig_5.90  | An14g06320        |
| evm.model.unitig_5.900 | An09g02530        |
| evm.model.unitig_5.901 | An09g02520        |
| evm.model.unitig_5.902 | An09g02510        |
| evm.model.unitig_5.903 | An09g02490        |
| evm.model.unitig_5.904 | An09g02470        |
| evm.model.unitig_5.905 | An09g02460        |
| evm.model.unitig_5.907 | An09g02440        |
| evm.model.unitig_5.908 | An09g02430        |
| evm.model.unitig_5.91  | An14g06310        |
| evm.model.unitig_5.910 | An09g02410        |
| evm.model.unitig_5.911 | An09g02390        |
| evm.model.unitig_5.912 | An09g02380        |

---

---

| Gene ID of H915-1      | Gene ID of 513.88 |
|------------------------|-------------------|
| evm.model.unitig_5.913 | An06g02150        |
| evm.model.unitig_5.914 | An06g00940        |
| evm.model.unitig_5.915 | An11g07050        |
| evm.model.unitig_5.916 | An06g00940        |
| evm.model.unitig_5.917 | An09g02370        |
| evm.model.unitig_5.918 | An09g02340        |
| evm.model.unitig_5.919 | An09g02330        |
| evm.model.unitig_5.92  | An14g06300        |
| evm.model.unitig_5.920 | An09g02320        |
| evm.model.unitig_5.922 | An09g02290        |
| evm.model.unitig_5.923 | An09g02280        |
| evm.model.unitig_5.924 | An09g02270        |
| evm.model.unitig_5.925 | An09g02260        |
| evm.model.unitig_5.926 | An09g02250        |
| evm.model.unitig_5.927 | An09g02240        |
| evm.model.unitig_5.928 | An09g02230        |
| evm.model.unitig_5.929 | An09g02220        |
| evm.model.unitig_5.93  | An14g06290        |
| evm.model.unitig_5.930 | An09g02210        |
| evm.model.unitig_5.931 | An09g02180        |
| evm.model.unitig_5.932 | An09g02160        |
| evm.model.unitig_5.933 | An09g02150        |
| evm.model.unitig_5.934 | An09g02120        |
| evm.model.unitig_5.935 | An01g13720        |
| evm.model.unitig_5.936 | An18g00750        |
| evm.model.unitig_5.937 | An09g02080        |
| evm.model.unitig_5.938 | An09g02060        |
| evm.model.unitig_5.939 | An09g02050        |
| evm.model.unitig_5.94  | An14g06280        |
| evm.model.unitig_5.940 | An09g02040        |
| evm.model.unitig_5.941 | An09g02020        |
| evm.model.unitig_5.942 | An09g02010        |
| evm.model.unitig_5.943 | An09g02000        |
| evm.model.unitig_5.944 | An09g01990        |
| evm.model.unitig_5.945 | An09g01970        |
| evm.model.unitig_5.946 | An09g01950        |
| evm.model.unitig_5.947 | An09g01930        |
| evm.model.unitig_5.948 | An09g01910        |
| evm.model.unitig_5.949 | An09g01870        |
| evm.model.unitig_5.95  | An14g06270        |
| evm.model.unitig_5.950 | An09g01860        |
| evm.model.unitig_5.951 | An09g01840        |
| evm.model.unitig_5.952 | An09g01820        |

---



---

| Gene ID of H915-1      | Gene ID of 513.88 |
|------------------------|-------------------|
| evm.model.unitig_5.953 | An09g01810        |
| evm.model.unitig_5.954 | An09g01800        |
| evm.model.unitig_5.955 | An09g01790        |
| evm.model.unitig_5.956 | An09g01740        |
| evm.model.unitig_5.957 | An09g01710        |
| evm.model.unitig_5.958 | An09g01700        |
| evm.model.unitig_5.959 | An09g01690        |
| evm.model.unitig_5.96  | An14g06260        |
| evm.model.unitig_5.960 | An09g01680        |
| evm.model.unitig_5.962 | An09g01650        |
| evm.model.unitig_5.963 | An09g01630        |
| evm.model.unitig_5.964 | An09g01620        |
| evm.model.unitig_5.965 | An09g01560        |
| evm.model.unitig_5.966 | An09g01550        |
| evm.model.unitig_5.967 | An09g01540        |
| evm.model.unitig_5.968 | An09g01520        |
| evm.model.unitig_5.969 | An09g01510        |
| evm.model.unitig_5.97  | An14g06250        |
| evm.model.unitig_5.970 | An09g01510        |
| evm.model.unitig_5.973 | An01g01840        |
| evm.model.unitig_5.974 | An09g01440        |
| evm.model.unitig_5.975 | An09g01430        |
| evm.model.unitig_5.976 | An16g05710        |
| evm.model.unitig_5.977 | An09g01380        |
| evm.model.unitig_5.978 | An09g01370        |
| evm.model.unitig_5.979 | An09g01330        |
| evm.model.unitig_5.98  | An14g06230        |
| evm.model.unitig_5.980 | An09g01320        |
| evm.model.unitig_5.981 | An09g01310        |
| evm.model.unitig_5.982 | An09g01300        |
| evm.model.unitig_5.983 | An09g01290        |
| evm.model.unitig_5.984 | An09g01270        |
| evm.model.unitig_5.985 | An09g01260        |
| evm.model.unitig_5.987 | An09g01240        |
| evm.model.unitig_5.988 | An09g01220        |
| evm.model.unitig_5.989 | An09g01210        |
| evm.model.unitig_5.99  | An14g06220        |
| evm.model.unitig_5.990 | An09g01200        |
| evm.model.unitig_5.991 | An09g01190        |
| evm.model.unitig_5.992 | An09g01180        |
| evm.model.unitig_5.993 | An09g01170        |
| evm.model.unitig_5.994 | An09g01160        |
| evm.model.unitig_5.995 | An09g01150        |

---

---

| Gene ID of H915-1      | Gene ID of 513.88 |
|------------------------|-------------------|
| evm.model.unitig_5.996 | An09g01140        |
| evm.model.unitig_5.997 | An09g01130        |
| evm.model.unitig_5.998 | An09g01125        |
| evm.model.unitig_5.999 | An09g01120        |
| evm.model.unitig_50.1  | -                 |
| evm.model.unitig_52.1  | -                 |
| evm.model.unitig_58.2  | -                 |
| evm.model.unitig_6.1   | An10g00010        |
| evm.model.unitig_6.10  | An10g00150        |
| evm.model.unitig_6.100 | An17g00090        |
| evm.model.unitig_6.101 | An17g00120        |
| evm.model.unitig_6.102 | An14g01910        |
| evm.model.unitig_6.103 | An11g06460        |
| evm.model.unitig_6.104 | An17g00170        |
| evm.model.unitig_6.105 | An17g00180        |
| evm.model.unitig_6.106 | An17g00200        |
| evm.model.unitig_6.107 | An17g00210        |
| evm.model.unitig_6.108 | An17g00230        |
| evm.model.unitig_6.109 | An17g00240        |
| evm.model.unitig_6.11  | An10g00150        |
| evm.model.unitig_6.110 | An17g00250        |
| evm.model.unitig_6.111 | An17g00260        |
| evm.model.unitig_6.112 | An17g00270        |
| evm.model.unitig_6.113 | An17g00280        |
| evm.model.unitig_6.114 | An17g00290        |
| evm.model.unitig_6.115 | An17g00300        |
| evm.model.unitig_6.116 | An17g00310        |
| evm.model.unitig_6.117 | An17g00320        |
| evm.model.unitig_6.118 | An17g00330        |
| evm.model.unitig_6.119 | An17g00340        |
| evm.model.unitig_6.12  | An10g00160        |
| evm.model.unitig_6.120 | An17g00370        |
| evm.model.unitig_6.121 | An17g00380        |
| evm.model.unitig_6.122 | An17g00390        |
| evm.model.unitig_6.123 | An17g00390        |
| evm.model.unitig_6.124 | An17g00400        |
| evm.model.unitig_6.125 | An11g02830        |
| evm.model.unitig_6.126 | An17g00420        |
| evm.model.unitig_6.127 | An17g00430        |
| evm.model.unitig_6.128 | An17g00440        |
| evm.model.unitig_6.129 | An17g00450        |
| evm.model.unitig_6.13  | An10g00170        |
| evm.model.unitig_6.130 | An17g00470        |

---

---

| Gene ID of H915-1      | Gene ID of 513.88 |
|------------------------|-------------------|
| evm.model.unitig_6.132 | An17g00520        |
| evm.model.unitig_6.133 | An17g00530        |
| evm.model.unitig_6.134 | An17g00550        |
| evm.model.unitig_6.135 | An17g00560        |
| evm.model.unitig_6.136 | An17g00570        |
| evm.model.unitig_6.137 | An17g00580        |
| evm.model.unitig_6.138 | An17g00590        |
| evm.model.unitig_6.14  | An10g00180        |
| evm.model.unitig_6.140 | An17g00600        |
| evm.model.unitig_6.141 | An17g00620        |
| evm.model.unitig_6.142 | An17g00630        |
| evm.model.unitig_6.143 | An17g00640        |
| evm.model.unitig_6.144 | An17g00650        |
| evm.model.unitig_6.145 | An17g00660        |
| evm.model.unitig_6.146 | An17g00670        |
| evm.model.unitig_6.147 | An17g00680        |
| evm.model.unitig_6.148 | An17g00690        |
| evm.model.unitig_6.149 | An17g00700        |
| evm.model.unitig_6.15  | An10g00190        |
| evm.model.unitig_6.150 | An17g00710        |
| evm.model.unitig_6.151 | An17g00720        |
| evm.model.unitig_6.152 | An17g00730        |
| evm.model.unitig_6.153 | An17g00750        |
| evm.model.unitig_6.154 | An17g00760        |
| evm.model.unitig_6.155 | An17g00770        |
| evm.model.unitig_6.156 | An17g00780        |
| evm.model.unitig_6.157 | An17g00790        |
| evm.model.unitig_6.158 | An17g00800        |
| evm.model.unitig_6.159 | An17g00810        |
| evm.model.unitig_6.16  | An10g00210        |
| evm.model.unitig_6.160 | An17g00820        |
| evm.model.unitig_6.161 | An17g00830        |
| evm.model.unitig_6.162 | An17g00840        |
| evm.model.unitig_6.163 | An17g00850        |
| evm.model.unitig_6.164 | An17g00860        |
| evm.model.unitig_6.165 | An17g00870        |
| evm.model.unitig_6.166 | An17g00890        |
| evm.model.unitig_6.167 | An17g00910        |
| evm.model.unitig_6.168 | An17g00930        |
| evm.model.unitig_6.169 | An17g00940        |
| evm.model.unitig_6.17  | An10g00220        |
| evm.model.unitig_6.170 | An17g00970        |
| evm.model.unitig_6.171 | An17g01000        |

---

---

| Gene ID of H915-1      | Gene ID of 513.88 |
|------------------------|-------------------|
| evm.model.unitig_6.172 | An17g01040        |
| evm.model.unitig_6.173 | An17g01050        |
| evm.model.unitig_6.174 | An17g01060        |
| evm.model.unitig_6.175 | An17g01070        |
| evm.model.unitig_6.176 | An17g01080        |
| evm.model.unitig_6.177 | An17g01100        |
| evm.model.unitig_6.178 | An17g01120        |
| evm.model.unitig_6.179 | An17g01140        |
| evm.model.unitig_6.18  | An10g00230        |
| evm.model.unitig_6.180 | An17g01160        |
| evm.model.unitig_6.181 | An17g01170        |
| evm.model.unitig_6.183 | An17g01250        |
| evm.model.unitig_6.184 | An17g01260        |
| evm.model.unitig_6.185 | An17g01270        |
| evm.model.unitig_6.186 | An17g01280        |
| evm.model.unitig_6.187 | An17g01300        |
| evm.model.unitig_6.188 | An17g01310        |
| evm.model.unitig_6.189 | An17g01320        |
| evm.model.unitig_6.19  | An10g00240        |
| evm.model.unitig_6.190 | An17g01330        |
| evm.model.unitig_6.191 | An17g01340        |
| evm.model.unitig_6.192 | An17g01350        |
| evm.model.unitig_6.193 | An17g01360        |
| evm.model.unitig_6.194 | An17g01370        |
| evm.model.unitig_6.195 | An17g01390        |
| evm.model.unitig_6.196 | An17g01410        |
| evm.model.unitig_6.197 | An17g01420        |
| evm.model.unitig_6.198 | An17g01430        |
| evm.model.unitig_6.199 | An17g01440        |
| evm.model.unitig_6.2   | An15g01800        |
| evm.model.unitig_6.20  | An10g00250        |
| evm.model.unitig_6.200 | An17g01450        |
| evm.model.unitig_6.201 | An17g01470        |
| evm.model.unitig_6.202 | An17g01480        |
| evm.model.unitig_6.203 | An17g01490        |
| evm.model.unitig_6.204 | An17g01530        |
| evm.model.unitig_6.205 | An17g01540        |
| evm.model.unitig_6.206 | An17g01550        |
| evm.model.unitig_6.207 | An17g01560        |
| evm.model.unitig_6.208 | An17g01580        |
| evm.model.unitig_6.209 | An17g01630        |
| evm.model.unitig_6.21  | An10g00260        |
| evm.model.unitig_6.210 | An17g01640        |

---

---

| Gene ID of H915-1      | Gene ID of 513.88 |
|------------------------|-------------------|
| evm.model.unitig_6.211 | An17g01660        |
| evm.model.unitig_6.212 | An17g01670        |
| evm.model.unitig_6.213 | An17g01710        |
| evm.model.unitig_6.214 | An17g01720        |
| evm.model.unitig_6.215 | An17g01730        |
| evm.model.unitig_6.216 | An17g01740        |
| evm.model.unitig_6.217 | An17g01750        |
| evm.model.unitig_6.218 | An17g01770        |
| evm.model.unitig_6.22  | An10g00280        |
| evm.model.unitig_6.221 | An01g02880        |
| evm.model.unitig_6.222 | An17g01795        |
| evm.model.unitig_6.223 | An17g01805        |
| evm.model.unitig_6.224 | An17g01815        |
| evm.model.unitig_6.225 | An17g01825        |
| evm.model.unitig_6.226 | An17g01865        |
| evm.model.unitig_6.227 | An17g01875        |
| evm.model.unitig_6.228 | An17g01925        |
| evm.model.unitig_6.229 | An17g01945        |
| evm.model.unitig_6.23  | An10g00290        |
| evm.model.unitig_6.230 | An17g01965        |
| evm.model.unitig_6.231 | An17g01977        |
| evm.model.unitig_6.232 | -                 |
| evm.model.unitig_6.233 | An17g02010        |
| evm.model.unitig_6.234 | An17g02020        |
| evm.model.unitig_6.235 | An17g02030        |
| evm.model.unitig_6.236 | An17g02040        |
| evm.model.unitig_6.237 | An17g02060        |
| evm.model.unitig_6.238 | An17g02070        |
| evm.model.unitig_6.239 | An17g02075        |
| evm.model.unitig_6.24  | An10g00300        |
| evm.model.unitig_6.240 | An17g02080        |
| evm.model.unitig_6.241 | An17g02090        |
| evm.model.unitig_6.242 | An17g02100        |
| evm.model.unitig_6.243 | An17g02110        |
| evm.model.unitig_6.244 | An17g02120        |
| evm.model.unitig_6.245 | An17g02130        |
| evm.model.unitig_6.246 | An17g02140        |
| evm.model.unitig_6.247 | An17g02150        |
| evm.model.unitig_6.248 | An17g02160        |
| evm.model.unitig_6.249 | An17g02170        |
| evm.model.unitig_6.25  | An10g00310        |
| evm.model.unitig_6.250 | An17g02180        |
| evm.model.unitig_6.251 | An17g02190        |

---

---

| Gene ID of H915-1      | Gene ID of 513.88 |
|------------------------|-------------------|
| evm.model.unitig_6.252 | An17g02210        |
| evm.model.unitig_6.253 | An17g02220        |
| evm.model.unitig_6.254 | An17g02230        |
| evm.model.unitig_6.255 | An17g02240        |
| evm.model.unitig_6.256 | An17g02250        |
| evm.model.unitig_6.257 | An17g02270        |
| evm.model.unitig_6.258 | An17g02280        |
| evm.model.unitig_6.259 | -                 |
| evm.model.unitig_6.26  | An10g00320        |
| evm.model.unitig_6.260 | An17g02287        |
| evm.model.unitig_6.261 | An17g02290        |
| evm.model.unitig_6.262 | An17g02300        |
| evm.model.unitig_6.263 | An17g02310        |
| evm.model.unitig_6.264 | An17g02330        |
| evm.model.unitig_6.265 | An17g02340        |
| evm.model.unitig_6.266 | An17g02350        |
| evm.model.unitig_6.267 | An17g02370        |
| evm.model.unitig_6.268 | An17g02390        |
| evm.model.unitig_6.269 | An16g09320        |
| evm.model.unitig_6.27  | An10g00330        |
| evm.model.unitig_6.270 | An16g09300        |
| evm.model.unitig_6.271 | An16g09280        |
| evm.model.unitig_6.272 | An16g09260        |
| evm.model.unitig_6.273 | An16g09250        |
| evm.model.unitig_6.274 | An16g09230        |
| evm.model.unitig_6.275 | An16g09210        |
| evm.model.unitig_6.276 | An16g09200        |
| evm.model.unitig_6.277 | An16g09190        |
| evm.model.unitig_6.278 | An16g09180        |
| evm.model.unitig_6.279 | -                 |
| evm.model.unitig_6.28  | An10g00350        |
| evm.model.unitig_6.280 | An16g09160        |
| evm.model.unitig_6.281 | An16g09150        |
| evm.model.unitig_6.282 | An16g09140        |
| evm.model.unitig_6.283 | An16g09130        |
| evm.model.unitig_6.284 | An16g09090        |
| evm.model.unitig_6.285 | An16g09070        |
| evm.model.unitig_6.286 | An16g09060        |
| evm.model.unitig_6.287 | An16g09050        |
| evm.model.unitig_6.288 | An16g09040        |
| evm.model.unitig_6.289 | An16g09020        |
| evm.model.unitig_6.29  | An10g00360        |
| evm.model.unitig_6.290 | An16g09010        |

---

---

| Gene ID of H915-1      | Gene ID of 513.88 |
|------------------------|-------------------|
| evm.model.unitig_6.291 | An16g08980        |
| evm.model.unitig_6.292 | An16g08950        |
| evm.model.unitig_6.293 | An16g08940        |
| evm.model.unitig_6.294 | -                 |
| evm.model.unitig_6.295 | An16g08920        |
| evm.model.unitig_6.296 | An16g08910        |
| evm.model.unitig_6.297 | An16g08890        |
| evm.model.unitig_6.298 | An16g08880        |
| evm.model.unitig_6.299 | An16g08870        |
| evm.model.unitig_6.3   | An10g00050        |
| evm.model.unitig_6.30  | An10g00370        |
| evm.model.unitig_6.300 | An16g08860        |
| evm.model.unitig_6.301 | -                 |
| evm.model.unitig_6.302 | An16g08850        |
| evm.model.unitig_6.303 | An16g08840        |
| evm.model.unitig_6.304 | An16g08830        |
| evm.model.unitig_6.305 | An16g08820        |
| evm.model.unitig_6.306 | An16g08810        |
| evm.model.unitig_6.307 | An16g08800        |
| evm.model.unitig_6.308 | An16g08780        |
| evm.model.unitig_6.309 | An16g08760        |
| evm.model.unitig_6.31  | An10g00390        |
| evm.model.unitig_6.310 | An16g08740        |
| evm.model.unitig_6.311 | An16g08730        |
| evm.model.unitig_6.312 | An16g08720        |
| evm.model.unitig_6.313 | An16g08710        |
| evm.model.unitig_6.314 | An16g08700        |
| evm.model.unitig_6.315 | An18g04070        |
| evm.model.unitig_6.316 | An02g03740        |
| evm.model.unitig_6.317 | An16g08680        |
| evm.model.unitig_6.318 | An16g08670        |
| evm.model.unitig_6.319 | An16g08650        |
| evm.model.unitig_6.32  | An10g00400        |
| evm.model.unitig_6.320 | An16g08640        |
| evm.model.unitig_6.321 | An16g08630        |
| evm.model.unitig_6.322 | An16g08620        |
| evm.model.unitig_6.323 | An16g08610        |
| evm.model.unitig_6.324 | An16g08610        |
| evm.model.unitig_6.325 | An16g08590        |
| evm.model.unitig_6.326 | An16g08570        |
| evm.model.unitig_6.327 | An16g08560        |
| evm.model.unitig_6.328 | An16g08540        |
| evm.model.unitig_6.329 | An16g08530        |

---

---

| Gene ID of H915-1      | Gene ID of 513.88 |
|------------------------|-------------------|
| evm.model.unitig_6.33  | An10g00410        |
| evm.model.unitig_6.330 | An16g08520        |
| evm.model.unitig_6.331 | An16g08510        |
| evm.model.unitig_6.332 | An16g08500        |
| evm.model.unitig_6.333 | An16g08490        |
| evm.model.unitig_6.334 | An16g08480        |
| evm.model.unitig_6.335 | An16g08470        |
| evm.model.unitig_6.336 | An16g08460        |
| evm.model.unitig_6.337 | An16g08450        |
| evm.model.unitig_6.338 | An16g08440        |
| evm.model.unitig_6.339 | An16g08420        |
| evm.model.unitig_6.340 | An16g08410        |
| evm.model.unitig_6.341 | An16g08390        |
| evm.model.unitig_6.342 | An16g08380        |
| evm.model.unitig_6.343 | An16g08360        |
| evm.model.unitig_6.344 | An16g08330        |
| evm.model.unitig_6.346 | An16g08220        |
| evm.model.unitig_6.347 | An16g08210        |
| evm.model.unitig_6.348 | An16g08200        |
| evm.model.unitig_6.349 | An16g08170        |
| evm.model.unitig_6.35  | -                 |
| evm.model.unitig_6.350 | An16g08150        |
| evm.model.unitig_6.351 | An16g08140        |
| evm.model.unitig_6.352 | An16g08130        |
| evm.model.unitig_6.353 | An16g08120        |
| evm.model.unitig_6.354 | An16g08110        |
| evm.model.unitig_6.355 | An16g08100        |
| evm.model.unitig_6.356 | An16g08090        |
| evm.model.unitig_6.357 | An16g08080        |
| evm.model.unitig_6.358 | An16g08070        |
| evm.model.unitig_6.359 | An16g08060        |
| evm.model.unitig_6.36  | An10g00450        |
| evm.model.unitig_6.360 | An11g01200        |
| evm.model.unitig_6.361 | An16g08040        |
| evm.model.unitig_6.362 | An16g08020        |
| evm.model.unitig_6.363 | An16g08010        |
| evm.model.unitig_6.364 | An16g08000        |
| evm.model.unitig_6.365 | An16g07990        |
| evm.model.unitig_6.366 | An16g07980        |
| evm.model.unitig_6.367 | An16g07970        |
| evm.model.unitig_6.368 | An16g07960        |
| evm.model.unitig_6.369 | An16g07940        |
| evm.model.unitig_6.37  | An10g00450        |

---



---

| Gene ID of H915-1      | Gene ID of 513.88 |
|------------------------|-------------------|
| evm.model.unitig_6.371 | An16g07920        |
| evm.model.unitig_6.372 | An16g07910        |
| evm.model.unitig_6.373 | An16g07900        |
| evm.model.unitig_6.374 | An16g07890        |
| evm.model.unitig_6.375 | An16g07870        |
| evm.model.unitig_6.376 | An16g07860        |
| evm.model.unitig_6.377 | An16g07830        |
| evm.model.unitig_6.378 | An16g07810        |
| evm.model.unitig_6.379 | An16g07800        |
| evm.model.unitig_6.38  | An10g00460        |
| evm.model.unitig_6.380 | An16g07795        |
| evm.model.unitig_6.381 | An16g07720        |
| evm.model.unitig_6.382 | An16g07710        |
| evm.model.unitig_6.383 | An16g07700        |
| evm.model.unitig_6.384 | An16g07690        |
| evm.model.unitig_6.385 | An16g07680        |
| evm.model.unitig_6.386 | An16g07660        |
| evm.model.unitig_6.387 | An16g07650        |
| evm.model.unitig_6.388 | An16g07640        |
| evm.model.unitig_6.389 | An16g07630        |
| evm.model.unitig_6.39  | An10g00470        |
| evm.model.unitig_6.390 | An16g07620        |
| evm.model.unitig_6.391 | An16g07610        |
| evm.model.unitig_6.392 | An16g07580        |
| evm.model.unitig_6.394 | An16g07540        |
| evm.model.unitig_6.395 | An16g07530        |
| evm.model.unitig_6.396 | An16g07520        |
| evm.model.unitig_6.397 | An16g07510        |
| evm.model.unitig_6.398 | An16g07500        |
| evm.model.unitig_6.399 | An16g07490        |
| evm.model.unitig_6.4   | An10g00050        |
| evm.model.unitig_6.40  | An10g00490        |
| evm.model.unitig_6.400 | An16g07480        |
| evm.model.unitig_6.401 | An16g07460        |
| evm.model.unitig_6.402 | An16g07450        |
| evm.model.unitig_6.403 | An16g07440        |
| evm.model.unitig_6.404 | An16g07430        |
| evm.model.unitig_6.405 | An16g07420        |
| evm.model.unitig_6.406 | An16g07410        |
| evm.model.unitig_6.407 | An16g07400        |
| evm.model.unitig_6.408 | An16g07390        |
| evm.model.unitig_6.409 | An16g07380        |
| evm.model.unitig_6.41  | An10g00500        |

---

---

| Gene ID of H915-1      | Gene ID of 513.88 |
|------------------------|-------------------|
| evm.model.unitig_6.410 | An16g07370        |
| evm.model.unitig_6.411 | An16g07360        |
| evm.model.unitig_6.412 | An16g07350        |
| evm.model.unitig_6.414 | An16g07340        |
| evm.model.unitig_6.415 | An16g07330        |
| evm.model.unitig_6.416 | An16g07300        |
| evm.model.unitig_6.417 | An16g07290        |
| evm.model.unitig_6.418 | An16g07280        |
| evm.model.unitig_6.419 | An16g07260        |
| evm.model.unitig_6.42  | An10g00510        |
| evm.model.unitig_6.420 | An16g07230        |
| evm.model.unitig_6.421 | An16g07220        |
| evm.model.unitig_6.422 | An16g07210        |
| evm.model.unitig_6.423 | An16g07200        |
| evm.model.unitig_6.424 | An16g07180        |
| evm.model.unitig_6.425 | An16g07150        |
| evm.model.unitig_6.426 | An16g07140        |
| evm.model.unitig_6.427 | An16g07130        |
| evm.model.unitig_6.428 | An16g07120        |
| evm.model.unitig_6.429 | An16g07110        |
| evm.model.unitig_6.43  | An09g05780        |
| evm.model.unitig_6.430 | An16g07090        |
| evm.model.unitig_6.431 | An16g07040        |
| evm.model.unitig_6.432 | An16g07030        |
| evm.model.unitig_6.433 | An04g08040        |
| evm.model.unitig_6.434 | An16g06990        |
| evm.model.unitig_6.435 | An16g06950        |
| evm.model.unitig_6.436 | An16g06940        |
| evm.model.unitig_6.438 | An16g06890        |
| evm.model.unitig_6.439 | An16g06860        |
| evm.model.unitig_6.44  | An10g00530        |
| evm.model.unitig_6.440 | An16g06850        |
| evm.model.unitig_6.442 | An16g06820        |
| evm.model.unitig_6.443 | An16g06810        |
| evm.model.unitig_6.444 | An16g06800        |
| evm.model.unitig_6.445 | An16g06790        |
| evm.model.unitig_6.446 | An16g06780        |
| evm.model.unitig_6.447 | An16g06770        |
| evm.model.unitig_6.448 | An16g06760        |
| evm.model.unitig_6.449 | An16g06750        |
| evm.model.unitig_6.45  | An10g00540        |
| evm.model.unitig_6.450 | An16g06740        |
| evm.model.unitig_6.451 | An16g06720        |

---

---

| Gene ID of H915-1      | Gene ID of 513.88 |
|------------------------|-------------------|
| evm.model.unitig_6.452 | An16g06710        |
| evm.model.unitig_6.453 | An16g06690        |
| evm.model.unitig_6.454 | An16g06680        |
| evm.model.unitig_6.456 | An18g02280        |
| evm.model.unitig_6.457 | An16g06630        |
| evm.model.unitig_6.458 | An16g06620        |
| evm.model.unitig_6.459 | An16g06610        |
| evm.model.unitig_6.46  | An10g00560        |
| evm.model.unitig_6.460 | An16g06600        |
| evm.model.unitig_6.461 | An16g06590        |
| evm.model.unitig_6.462 | An16g06580        |
| evm.model.unitig_6.464 | An16g06560        |
| evm.model.unitig_6.465 | An16g06550        |
| evm.model.unitig_6.466 | An16g06540        |
| evm.model.unitig_6.467 | An16g06530        |
| evm.model.unitig_6.468 | An16g06520        |
| evm.model.unitig_6.469 | An16g06510        |
| evm.model.unitig_6.47  | An10g00570        |
| evm.model.unitig_6.470 | An16g06500        |
| evm.model.unitig_6.471 | An16g06490        |
| evm.model.unitig_6.472 | An16g06480        |
| evm.model.unitig_6.473 | An16g06470        |
| evm.model.unitig_6.474 | An16g06460        |
| evm.model.unitig_6.475 | An16g06440        |
| evm.model.unitig_6.476 | An16g06440        |
| evm.model.unitig_6.477 | An16g06420        |
| evm.model.unitig_6.478 | An16g06410        |
| evm.model.unitig_6.479 | An16g06400        |
| evm.model.unitig_6.48  | An10g00600        |
| evm.model.unitig_6.480 | An16g06390        |
| evm.model.unitig_6.481 | An01g14430        |
| evm.model.unitig_6.482 | An16g06370        |
| evm.model.unitig_6.483 | An16g06360        |
| evm.model.unitig_6.484 | An16g06350        |
| evm.model.unitig_6.486 | An16g06300        |
| evm.model.unitig_6.487 | An16g06270        |
| evm.model.unitig_6.488 | An16g06260        |
| evm.model.unitig_6.489 | An16g06240        |
| evm.model.unitig_6.49  | An10g00600        |
| evm.model.unitig_6.490 | An16g06220        |
| evm.model.unitig_6.491 | An16g06210        |
| evm.model.unitig_6.492 | An16g06200        |
| evm.model.unitig_6.493 | An16g06190        |

---

---

| Gene ID of H915-1      | Gene ID of 513.88 |
|------------------------|-------------------|
| evm.model.unitig_6.494 | An16g06170        |
| evm.model.unitig_6.495 | An08g11610        |
| evm.model.unitig_6.496 | An16g06140        |
| evm.model.unitig_6.497 | An16g06120        |
| evm.model.unitig_6.498 | An16g06100        |
| evm.model.unitig_6.499 | An16g06090        |
| evm.model.unitig_6.5   | An10g00070        |
| evm.model.unitig_6.50  | An10g00600        |
| evm.model.unitig_6.500 | An16g06080        |
| evm.model.unitig_6.503 | An16g06010        |
| evm.model.unitig_6.504 | An16g05970        |
| evm.model.unitig_6.505 | An16g05960        |
| evm.model.unitig_6.506 | An16g05940        |
| evm.model.unitig_6.507 | An16g05930        |
| evm.model.unitig_6.508 | An16g05920        |
| evm.model.unitig_6.509 | An16g05910        |
| evm.model.unitig_6.51  | An10g00620        |
| evm.model.unitig_6.510 | An16g05880        |
| evm.model.unitig_6.511 | An16g05840        |
| evm.model.unitig_6.512 | An08g08030        |
| evm.model.unitig_6.513 | An16g05810        |
| evm.model.unitig_6.514 | An16g05790        |
| evm.model.unitig_6.515 | An11g03690        |
| evm.model.unitig_6.516 | An16g05770        |
| evm.model.unitig_6.517 | An16g05760        |
| evm.model.unitig_6.518 | An16g05750        |
| evm.model.unitig_6.519 | An16g05740        |
| evm.model.unitig_6.52  | An10g00630        |
| evm.model.unitig_6.520 | An16g05730        |
| evm.model.unitig_6.521 | An16g05710        |
| evm.model.unitig_6.522 | An16g05690        |
| evm.model.unitig_6.523 | An16g05660        |
| evm.model.unitig_6.524 | -                 |
| evm.model.unitig_6.525 | -                 |
| evm.model.unitig_6.526 | An16g05580        |
| evm.model.unitig_6.527 | An16g05570        |
| evm.model.unitig_6.528 | An16g05560        |
| evm.model.unitig_6.529 | An16g05550        |
| evm.model.unitig_6.53  | An10g00650        |
| evm.model.unitig_6.530 | An16g05520        |
| evm.model.unitig_6.531 | An16g05510        |
| evm.model.unitig_6.532 | An16g05500        |
| evm.model.unitig_6.533 | An16g05460        |

---

---

| Gene ID of H915-1      | Gene ID of 513.88 |
|------------------------|-------------------|
| evm.model.unitig_6.534 | An16g05460        |
| evm.model.unitig_6.535 | An16g05450        |
| evm.model.unitig_6.536 | An16g05440        |
| evm.model.unitig_6.537 | An16g05430        |
| evm.model.unitig_6.538 | An16g05420        |
| evm.model.unitig_6.539 | An16g05400        |
| evm.model.unitig_6.54  | An10g00690        |
| evm.model.unitig_6.540 | An16g05390        |
| evm.model.unitig_6.541 | An16g05380        |
| evm.model.unitig_6.542 | An16g05370        |
| evm.model.unitig_6.543 | An01g01030        |
| evm.model.unitig_6.544 | An16g05350        |
| evm.model.unitig_6.545 | An16g05340        |
| evm.model.unitig_6.546 | An16g05330        |
| evm.model.unitig_6.547 | An16g05320        |
| evm.model.unitig_6.548 | An16g05310        |
| evm.model.unitig_6.549 | An16g05290        |
| evm.model.unitig_6.55  | An10g00710        |
| evm.model.unitig_6.550 | An16g05280        |
| evm.model.unitig_6.551 | An16g05270        |
| evm.model.unitig_6.552 | An16g05190        |
| evm.model.unitig_6.554 | An16g05150        |
| evm.model.unitig_6.555 | An16g05130        |
| evm.model.unitig_6.556 | An16g05120        |
| evm.model.unitig_6.557 | An16g05090        |
| evm.model.unitig_6.558 | An16g05070        |
| evm.model.unitig_6.559 | An16g05060        |
| evm.model.unitig_6.56  | -                 |
| evm.model.unitig_6.560 | An16g05050        |
| evm.model.unitig_6.561 | An16g05030        |
| evm.model.unitig_6.562 | An16g05020        |
| evm.model.unitig_6.563 | An16g04970        |
| evm.model.unitig_6.564 | An16g04950        |
| evm.model.unitig_6.565 | An16g04940        |
| evm.model.unitig_6.566 | An16g04930        |
| evm.model.unitig_6.567 | An16g04920        |
| evm.model.unitig_6.568 | An16g04910        |
| evm.model.unitig_6.569 | An16g04900        |
| evm.model.unitig_6.57  | -                 |
| evm.model.unitig_6.570 | An16g04890        |
| evm.model.unitig_6.571 | An16g04880        |
| evm.model.unitig_6.572 | An16g04870        |
| evm.model.unitig_6.573 | An16g04840        |

---

---

| Gene ID of H915-1      | Gene ID of 513.88 |
|------------------------|-------------------|
| evm.model.unitig_6.574 | An16g04830        |
| evm.model.unitig_6.575 | An16g04820        |
| evm.model.unitig_6.576 | An16g04790        |
| evm.model.unitig_6.577 | An16g04780        |
| evm.model.unitig_6.578 | An16g04770        |
| evm.model.unitig_6.579 | An16g04760        |
| evm.model.unitig_6.58  | An10g00800        |
| evm.model.unitig_6.580 | An16g04750        |
| evm.model.unitig_6.581 | An16g04730        |
| evm.model.unitig_6.582 | An16g04720        |
| evm.model.unitig_6.583 | An16g04710        |
| evm.model.unitig_6.584 | An16g04700        |
| evm.model.unitig_6.585 | An16g04690        |
| evm.model.unitig_6.586 | An16g04680        |
| evm.model.unitig_6.587 | An16g04670        |
| evm.model.unitig_6.588 | An16g04660        |
| evm.model.unitig_6.589 | An16g04650        |
| evm.model.unitig_6.59  | An10g00820        |
| evm.model.unitig_6.590 | An16g04640        |
| evm.model.unitig_6.591 | An16g04630        |
| evm.model.unitig_6.592 | An16g04600        |
| evm.model.unitig_6.593 | An16g04580        |
| evm.model.unitig_6.594 | An16g04560        |
| evm.model.unitig_6.595 | An16g04550        |
| evm.model.unitig_6.596 | An16g04530        |
| evm.model.unitig_6.597 | An16g04530        |
| evm.model.unitig_6.598 | An16g04520        |
| evm.model.unitig_6.599 | An16g04500        |
| evm.model.unitig_6.6   | An10g00070        |
| evm.model.unitig_6.60  | An10g00830        |
| evm.model.unitig_6.600 | An16g04460        |
| evm.model.unitig_6.601 | An16g04440        |
| evm.model.unitig_6.602 | An16g04430        |
| evm.model.unitig_6.603 | An16g04420        |
| evm.model.unitig_6.604 | An16g04410        |
| evm.model.unitig_6.605 | An16g04400        |
| evm.model.unitig_6.606 | An16g04390        |
| evm.model.unitig_6.607 | An16g04370        |
| evm.model.unitig_6.608 | An16g04350        |
| evm.model.unitig_6.609 | An16g04340        |
| evm.model.unitig_6.61  | An10g00840        |
| evm.model.unitig_6.610 | An16g04330        |
| evm.model.unitig_6.611 | An16g04320        |

---

---

| Gene ID of H915-1      | Gene ID of 513.88 |
|------------------------|-------------------|
| evm.model.unitig_6.612 | An16g04310        |
| evm.model.unitig_6.613 | An16g04270        |
| evm.model.unitig_6.614 | An16g04260        |
| evm.model.unitig_6.615 | An16g04250        |
| evm.model.unitig_6.616 | An16g04230        |
| evm.model.unitig_6.617 | An16g04220        |
| evm.model.unitig_6.618 | An16g04210        |
| evm.model.unitig_6.619 | An16g04200        |
| evm.model.unitig_6.62  | An10g00850        |
| evm.model.unitig_6.620 | -                 |
| evm.model.unitig_6.621 | An16g04180        |
| evm.model.unitig_6.622 | An16g04170        |
| evm.model.unitig_6.623 | An16g04160        |
| evm.model.unitig_6.624 | An16g04150        |
| evm.model.unitig_6.625 | An16g04140        |
| evm.model.unitig_6.626 | An16g04130        |
| evm.model.unitig_6.627 | An16g04120        |
| evm.model.unitig_6.628 | -                 |
| evm.model.unitig_6.629 | An16g04110        |
| evm.model.unitig_6.63  | An10g00860        |
| evm.model.unitig_6.630 | An16g04100        |
| evm.model.unitig_6.631 | An16g04080        |
| evm.model.unitig_6.632 | An16g04060        |
| evm.model.unitig_6.633 | An16g04050        |
| evm.model.unitig_6.634 | An14g02500        |
| evm.model.unitig_6.635 | An16g04030        |
| evm.model.unitig_6.636 | An16g04020        |
| evm.model.unitig_6.637 | An16g04010        |
| evm.model.unitig_6.638 | An16g04000        |
| evm.model.unitig_6.639 | An16g03980        |
| evm.model.unitig_6.64  | An10g00880        |
| evm.model.unitig_6.640 | An16g03960        |
| evm.model.unitig_6.641 | An16g03950        |
| evm.model.unitig_6.642 | An16g03940        |
| evm.model.unitig_6.644 | An16g03910        |
| evm.model.unitig_6.645 | An16g03890        |
| evm.model.unitig_6.646 | An16g03880        |
| evm.model.unitig_6.647 | An16g03860        |
| evm.model.unitig_6.648 | An16g03850        |
| evm.model.unitig_6.649 | An16g03840        |
| evm.model.unitig_6.65  | An10g00900        |
| evm.model.unitig_6.650 | An16g03830        |
| evm.model.unitig_6.651 | An16g03820        |

---

---

| Gene ID of H915-1      | Gene ID of 513.88 |
|------------------------|-------------------|
| evm.model.unitig_6.652 | An16g03810        |
| evm.model.unitig_6.653 | An16g03800        |
| evm.model.unitig_6.654 | An16g03790        |
| evm.model.unitig_6.655 | An16g03760        |
| evm.model.unitig_6.656 | An16g03750        |
| evm.model.unitig_6.657 | An16g03740        |
| evm.model.unitig_6.658 | An16g03720        |
| evm.model.unitig_6.659 | An16g03710        |
| evm.model.unitig_6.66  | An10g00910        |
| evm.model.unitig_6.660 | An16g03700        |
| evm.model.unitig_6.661 | An16g03690        |
| evm.model.unitig_6.662 | An16g03650        |
| evm.model.unitig_6.663 | An16g03640        |
| evm.model.unitig_6.664 | An16g03630        |
| evm.model.unitig_6.665 | An16g03620        |
| evm.model.unitig_6.666 | An16g03610        |
| evm.model.unitig_6.667 | An16g03600        |
| evm.model.unitig_6.668 | An16g03590        |
| evm.model.unitig_6.669 | An16g03580        |
| evm.model.unitig_6.67  | An10g00950        |
| evm.model.unitig_6.672 | An16g03550        |
| evm.model.unitig_6.673 | An16g03540        |
| evm.model.unitig_6.674 | An16g03530        |
| evm.model.unitig_6.675 | An16g03520        |
| evm.model.unitig_6.676 | An16g03510        |
| evm.model.unitig_6.677 | An16g03500        |
| evm.model.unitig_6.678 | An16g03490        |
| evm.model.unitig_6.679 | An16g03450        |
| evm.model.unitig_6.68  | An08g04620        |
| evm.model.unitig_6.680 | An16g03430        |
| evm.model.unitig_6.681 | An16g03420        |
| evm.model.unitig_6.682 | An16g03410        |
| evm.model.unitig_6.683 | An16g03400        |
| evm.model.unitig_6.684 | An16g03390        |
| evm.model.unitig_6.685 | An16g03380        |
| evm.model.unitig_6.686 | An16g03370        |
| evm.model.unitig_6.687 | An16g03340        |
| evm.model.unitig_6.688 | An16g03330        |
| evm.model.unitig_6.689 | An16g03320        |
| evm.model.unitig_6.69  | An10g00970        |
| evm.model.unitig_6.690 | An16g03310        |
| evm.model.unitig_6.691 | An16g03300        |
| evm.model.unitig_6.692 | An16g03290        |

---



---

| Gene ID of H915-1      | Gene ID of 513.88 |
|------------------------|-------------------|
| evm.model.unitig_6.694 | An16g03190        |
| evm.model.unitig_6.695 | An16g03140        |
| evm.model.unitig_6.696 | An16g03130        |
| evm.model.unitig_6.697 | An16g03120        |
| evm.model.unitig_6.698 | An16g03110        |
| evm.model.unitig_6.699 | An16g03100        |
| evm.model.unitig_6.7   | An10g00100        |
| evm.model.unitig_6.70  | An10g01000        |
| evm.model.unitig_6.700 | An16g03090        |
| evm.model.unitig_6.701 | An16g03080        |
| evm.model.unitig_6.702 | An16g03070        |
| evm.model.unitig_6.703 | An16g03060        |
| evm.model.unitig_6.704 | An16g03050        |
| evm.model.unitig_6.705 | An16g03040        |
| evm.model.unitig_6.706 | An16g03030        |
| evm.model.unitig_6.707 | An16g03020        |
| evm.model.unitig_6.708 | An16g03010        |
| evm.model.unitig_6.709 | An16g03000        |
| evm.model.unitig_6.71  | An10g01010        |
| evm.model.unitig_6.710 | An16g02990        |
| evm.model.unitig_6.711 | An16g02980        |
| evm.model.unitig_6.712 | An16g02970        |
| evm.model.unitig_6.713 | An16g02960        |
| evm.model.unitig_6.714 | An16g02950        |
| evm.model.unitig_6.715 | An16g02940        |
| evm.model.unitig_6.716 | An16g02930        |
| evm.model.unitig_6.717 | An16g02920        |
| evm.model.unitig_6.718 | An16g02910        |
| evm.model.unitig_6.719 | An16g02890        |
| evm.model.unitig_6.72  | An10g01020        |
| evm.model.unitig_6.720 | An16g02870        |
| evm.model.unitig_6.721 | An16g02850        |
| evm.model.unitig_6.722 | An16g02820        |
| evm.model.unitig_6.723 | An16g02770        |
| evm.model.unitig_6.724 | An16g02760        |
| evm.model.unitig_6.725 | An10g00120        |
| evm.model.unitig_6.726 | An16g02740        |
| evm.model.unitig_6.727 | An16g02740        |
| evm.model.unitig_6.728 | An07g03950        |
| evm.model.unitig_6.729 | An16g02730        |
| evm.model.unitig_6.73  | An10g01040        |
| evm.model.unitig_6.730 | An16g02700        |
| evm.model.unitig_6.731 | An16g02680        |

---

---

| Gene ID of H915-1      | Gene ID of 513.88 |
|------------------------|-------------------|
| evm.model.unitig_6.732 | An16g02670        |
| evm.model.unitig_6.733 | An16g02660        |
| evm.model.unitig_6.734 | An16g02650        |
| evm.model.unitig_6.736 | An16g02610        |
| evm.model.unitig_6.737 | An16g02595        |
| evm.model.unitig_6.738 | An16g02590        |
| evm.model.unitig_6.739 | An16g02580        |
| evm.model.unitig_6.74  | An14g03640        |
| evm.model.unitig_6.740 | An16g02570        |
| evm.model.unitig_6.741 | An16g02560        |
| evm.model.unitig_6.742 | An16g02550        |
| evm.model.unitig_6.743 | An16g02520        |
| evm.model.unitig_6.744 | An16g02510        |
| evm.model.unitig_6.745 | An16g02500        |
| evm.model.unitig_6.746 | An16g02490        |
| evm.model.unitig_6.747 | An16g02480        |
| evm.model.unitig_6.748 | An16g02470        |
| evm.model.unitig_6.749 | An16g02460        |
| evm.model.unitig_6.75  | An07g01940        |
| evm.model.unitig_6.751 | An16g02450        |
| evm.model.unitig_6.752 | An16g02440        |
| evm.model.unitig_6.753 | An16g02430        |
| evm.model.unitig_6.754 | An16g02420        |
| evm.model.unitig_6.755 | An16g02400        |
| evm.model.unitig_6.756 | An16g02390        |
| evm.model.unitig_6.757 | An02g08660        |
| evm.model.unitig_6.758 | An16g02370        |
| evm.model.unitig_6.759 | An16g02360        |
| evm.model.unitig_6.760 | An16g02350        |
| evm.model.unitig_6.761 | An16g02330        |
| evm.model.unitig_6.762 | An16g02320        |
| evm.model.unitig_6.763 | An16g02250        |
| evm.model.unitig_6.764 | An16g02240        |
| evm.model.unitig_6.765 | An16g02230        |
| evm.model.unitig_6.766 | An18g03080        |
| evm.model.unitig_6.767 | An16g02210        |
| evm.model.unitig_6.768 | An16g02200        |
| evm.model.unitig_6.769 | An16g02190        |
| evm.model.unitig_6.77  | An11g08220        |
| evm.model.unitig_6.770 | An16g02180        |
| evm.model.unitig_6.771 | An16g02170        |
| evm.model.unitig_6.772 | An16g02160        |
| evm.model.unitig_6.773 | An16g02150        |

---

---

| Gene ID of H915-1      | Gene ID of 513.88 |
|------------------------|-------------------|
| evm.model.unitig_6.774 | An16g02140        |
| evm.model.unitig_6.775 | An16g02130        |
| evm.model.unitig_6.776 | An16g02120        |
| evm.model.unitig_6.777 | An16g02100        |
| evm.model.unitig_6.778 | An16g02090        |
| evm.model.unitig_6.779 | An16g02080        |
| evm.model.unitig_6.78  | An07g08940        |
| evm.model.unitig_6.780 | An16g02070        |
| evm.model.unitig_6.781 | An16g02060        |
| evm.model.unitig_6.782 | An16g02040        |
| evm.model.unitig_6.783 | An16g02020        |
| evm.model.unitig_6.784 | An16g02010        |
| evm.model.unitig_6.785 | An16g02000        |
| evm.model.unitig_6.786 | An16g01990        |
| evm.model.unitig_6.787 | An16g01980        |
| evm.model.unitig_6.788 | An16g01950        |
| evm.model.unitig_6.789 | An16g01940        |
| evm.model.unitig_6.790 | An16g01930        |
| evm.model.unitig_6.791 | An16g01920        |
| evm.model.unitig_6.792 | An16g01900        |
| evm.model.unitig_6.793 | An16g01890        |
| evm.model.unitig_6.794 | An16g01880        |
| evm.model.unitig_6.795 | An16g01870        |
| evm.model.unitig_6.796 | An16g01860        |
| evm.model.unitig_6.797 | An16g01850        |
| evm.model.unitig_6.798 | An16g01840        |
| evm.model.unitig_6.799 | An16g01830        |
| evm.model.unitig_6.8   | An10g00120        |
| evm.model.unitig_6.80  | An12g05240        |
| evm.model.unitig_6.800 | An16g01820        |
| evm.model.unitig_6.801 | An16g01810        |
| evm.model.unitig_6.802 | An16g01800        |
| evm.model.unitig_6.803 | An16g01780        |
| evm.model.unitig_6.804 | An16g01770        |
| evm.model.unitig_6.805 | An16g01760        |
| evm.model.unitig_6.806 | An16g01750        |
| evm.model.unitig_6.807 | An16g01740        |
| evm.model.unitig_6.808 | An16g01730        |
| evm.model.unitig_6.809 | An16g01720        |
| evm.model.unitig_6.81  | An12g05610        |
| evm.model.unitig_6.810 | An16g01710        |
| evm.model.unitig_6.811 | An07g01290        |
| evm.model.unitig_6.812 | An16g01690        |

---

---

| Gene ID of H915-1      | Gene ID of 513.88 |
|------------------------|-------------------|
| evm.model.unitig_6.813 | An16g01680        |
| evm.model.unitig_6.814 | An16g01670        |
| evm.model.unitig_6.815 | An16g01660        |
| evm.model.unitig_6.816 | An16g01650        |
| evm.model.unitig_6.817 | An16g01640        |
| evm.model.unitig_6.818 | An16g01630        |
| evm.model.unitig_6.819 | An16g01620        |
| evm.model.unitig_6.82  | An16g05190        |
| evm.model.unitig_6.820 | An16g01600        |
| evm.model.unitig_6.821 | An16g01590        |
| evm.model.unitig_6.822 | An16g01580        |
| evm.model.unitig_6.823 | An16g01570        |
| evm.model.unitig_6.824 | An16g01560        |
| evm.model.unitig_6.825 | An16g01550        |
| evm.model.unitig_6.826 | An16g01540        |
| evm.model.unitig_6.827 | An16g01530        |
| evm.model.unitig_6.828 | An16g01520        |
| evm.model.unitig_6.829 | An16g01510        |
| evm.model.unitig_6.83  | An16g06170        |
| evm.model.unitig_6.830 | An16g01500        |
| evm.model.unitig_6.831 | An16g01490        |
| evm.model.unitig_6.832 | An16g01480        |
| evm.model.unitig_6.833 | An16g01470        |
| evm.model.unitig_6.834 | An16g01460        |
| evm.model.unitig_6.835 | An16g01450        |
| evm.model.unitig_6.836 | An16g01440        |
| evm.model.unitig_6.837 | An04g03850        |
| evm.model.unitig_6.838 | An16g01420        |
| evm.model.unitig_6.839 | An16g01410        |
| evm.model.unitig_6.84  | An12g10240        |
| evm.model.unitig_6.840 | An16g08980        |
| evm.model.unitig_6.841 | An16g01390        |
| evm.model.unitig_6.842 | An16g01380        |
| evm.model.unitig_6.843 | An16g01370        |
| evm.model.unitig_6.844 | An16g01360        |
| evm.model.unitig_6.845 | An16g01320        |
| evm.model.unitig_6.846 | An16g01290        |
| evm.model.unitig_6.847 | An16g01280        |
| evm.model.unitig_6.849 | An16g01250        |
| evm.model.unitig_6.85  | An12g10230        |
| evm.model.unitig_6.851 | An16g01230        |
| evm.model.unitig_6.853 | An16g01200        |
| evm.model.unitig_6.854 | An16g01190        |

---

---

| Gene ID of H915-1      | Gene ID of 513.88 |
|------------------------|-------------------|
| evm.model.unitig_6.855 | An16g01170        |
| evm.model.unitig_6.856 | An16g01150        |
| evm.model.unitig_6.857 | An16g01110        |
| evm.model.unitig_6.858 | An16g01040        |
| evm.model.unitig_6.859 | An16g01030        |
| evm.model.unitig_6.86  | An03g00940        |
| evm.model.unitig_6.860 | An16g01010        |
| evm.model.unitig_6.861 | An16g01000        |
| evm.model.unitig_6.862 | An16g00990        |
| evm.model.unitig_6.863 | An02g08350        |
| evm.model.unitig_6.864 | An16g00960        |
| evm.model.unitig_6.865 | An16g00930        |
| evm.model.unitig_6.866 | An16g00920        |
| evm.model.unitig_6.867 | An16g00910        |
| evm.model.unitig_6.868 | An16g00900        |
| evm.model.unitig_6.869 | An16g00890        |
| evm.model.unitig_6.87  | An04g02610        |
| evm.model.unitig_6.870 | An16g00850        |
| evm.model.unitig_6.871 | An16g00830        |
| evm.model.unitig_6.872 | An16g00810        |
| evm.model.unitig_6.873 | An16g00800        |
| evm.model.unitig_6.874 | An16g00780        |
| evm.model.unitig_6.875 | An16g00780        |
| evm.model.unitig_6.876 | An16g00090        |
| evm.model.unitig_6.877 | An16g00760        |
| evm.model.unitig_6.878 | An16g00750        |
| evm.model.unitig_6.879 | An16g00740        |
| evm.model.unitig_6.88  | An09g00880        |
| evm.model.unitig_6.881 | An16g00710        |
| evm.model.unitig_6.882 | An16g00700        |
| evm.model.unitig_6.883 | An16g00660        |
| evm.model.unitig_6.884 | An02g10480        |
| evm.model.unitig_6.885 | An16g00600        |
| evm.model.unitig_6.886 | An16g00550        |
| evm.model.unitig_6.887 | An16g00540        |
| evm.model.unitig_6.888 | An16g00530        |
| evm.model.unitig_6.889 | An16g00520        |
| evm.model.unitig_6.890 | An16g00500        |
| evm.model.unitig_6.891 | An16g00460        |
| evm.model.unitig_6.892 | An16g00450        |
| evm.model.unitig_6.893 | An16g00440        |
| evm.model.unitig_6.894 | An16g00430        |
| evm.model.unitig_6.895 | An16g00420        |

---

---

| Gene ID of H915-1      | Gene ID of 513.88 |
|------------------------|-------------------|
| evm.model.unitig_6.896 | An16g00410        |
| evm.model.unitig_6.897 | An16g00400        |
| evm.model.unitig_6.898 | An16g00370        |
| evm.model.unitig_6.899 | An16g00350        |
| evm.model.unitig_6.9   | An10g00140        |
| evm.model.unitig_6.90  | An13g02680        |
| evm.model.unitig_6.900 | An16g00320        |
| evm.model.unitig_6.901 | An16g00290        |
| evm.model.unitig_6.902 | An16g00260        |
| evm.model.unitig_6.903 | An16g00250        |
| evm.model.unitig_6.904 | An16g00240        |
| evm.model.unitig_6.905 | An16g00230        |
| evm.model.unitig_6.906 | An16g00210        |
| evm.model.unitig_6.907 | An16g00200        |
| evm.model.unitig_6.908 | -                 |
| evm.model.unitig_6.909 | An16g00180        |
| evm.model.unitig_6.910 | -                 |
| evm.model.unitig_6.911 | An16g00090        |
| evm.model.unitig_6.913 | An16g00070        |
| evm.model.unitig_6.914 | An16g00040        |
| evm.model.unitig_6.915 | An16g00030        |
| evm.model.unitig_6.916 | An16g00020        |
| evm.model.unitig_6.917 | An16g00010        |
| evm.model.unitig_6.918 | An09g03800        |
| evm.model.unitig_6.919 | An03g01000        |
| evm.model.unitig_6.92  | An11g04700        |
| evm.model.unitig_6.923 | An13g02410        |
| evm.model.unitig_6.93  | An01g13260        |
| evm.model.unitig_6.94  | An16g04830        |
| evm.model.unitig_6.97  | An17g00010        |

---
